# Supplementary material
Source: publisher site journal article supplement (https://www.spandidos-publications.com/681/downloadSupplementary)
Supplement: Supplementary file 1 [file downloadSupplementary]

## Sheet: TopBlastHits
GO function annotation and analysis different expressed proteins of ACBP vs. control TopBlastHits
Sequence name	Sequence desc.	Sequence length	Hit desc.	Hit ACC	E-Value	Similarity	Bit-Score	Alignment length	Positives
G3V1D1	FRIH_HUMANFerritin heavy chain OS=Homo sapiens GN=FTH1 PE=1 SV=2	113	sp|P02794|FRIH_HUMANFerritin heavy chain OS=Homo sapiens GN=FTH1 PE=1 SV=2	P02794	3.50331e-81	100	239.58	113	113
Q9UDW1	QCR9_HUMANCytochrome b-c1 complex subunit 9 OS=Homo sapiens GN=UQCR10 PE=1 SV=3	63	sp|Q9UDW1|QCR9_HUMANCytochrome b-c1 complex subunit 9 OS=Homo sapiens GN=UQCR10 PE=1 SV=3	Q9UDW1	2.61338e-41	100	131.724	63	63
Q96AE4	FUBP1_HUMANFar upstream element-binding 1 OS=Homo sapiens GN=FUBP1 PE=1 SV=3	644	sp|Q96AE4|FUBP1_HUMANFar upstream element-binding protein 1 OS=Homo sapiens GN=FUBP1 PE=1 SV=3	Q96AE4	0	100	1275.38	644	644
K7ER90	EIF3G_HUMANEukaryotic translation initiation factor 3 subunit G OS=Homo sapiens GN=EIF3G PE=1 SV=2	227	sp|O75821|EIF3G_HUMANEukaryotic translation initiation factor 3 subunit G OS=Homo sapiens GN=EIF3G PE=1 SV=2	O75821	4.61887e-148	86	419.468	262	227
B4DUP5	EI2BD_HUMANTranslation initiation factor eIF-2B subunit delta OS=Homo sapiens GN=EIF2B4 PE=1 SV=2	312	sp|Q9UI10|EI2BD_HUMANTranslation initiation factor eIF-2B subunit delta OS=Homo sapiens GN=EIF2B4 PE=1 SV=2	Q9UI10	0	98	560.066	283	280
Q16678	CP1B1_HUMANCytochrome P450 1B1 OS=Homo sapiens GN=CYP1B1 PE=1 SV=2	543	sp|Q16678|CP1B1_HUMANCytochrome P450 1B1 OS=Homo sapiens GN=CYP1B1 PE=1 SV=2	Q16678	0	100	1121.69	543	543
A0A0J9YX89	SEP15_HUMAN15 kDa seleno OS=Homo sapiens GN=SEP15 PE=1 SV=3	88	sp|O60613|SEP15_HUMAN15 kDa selenoprotein OS=Homo sapiens GN=SEP15 PE=1 SV=3	O60613	3.48441e-30	69	107.071	92	64
Q5JSB5	TFDP1_HUMANTranscription factor Dp-1 OS=Homo sapiens GN=TFDP1 PE=1 SV=1	235	sp|Q14186|TFDP1_HUMANTranscription factor Dp-1 OS=Homo sapiens GN=TFDP1 PE=1 SV=1	Q14186	1.79032e-173	100	487.649	235	235
M0R2S3	CCD94_HUMANCoiled-coil domain-containing 94 OS=Homo sapiens GN=CCDC94 PE=1 SV=1	160	sp|Q9BW85|CCD94_HUMANCoiled-coil domain-containing protein 94 OS=Homo sapiens GN=CCDC94 PE=1 SV=1	Q9BW85	5.68869e-115	100	332.413	160	160
Q53EY9	FBX22_HUMANF-box only 22 OS=Homo sapiens GN=FBXO22 PE=1 SV=1	403	sp|Q8NEZ5|FBX22_HUMANF-box only protein 22 OS=Homo sapiens GN=FBXO22 PE=1 SV=1	Q8NEZ5	0	99	828.55	403	402
B4DWS8	RASL2_HUMANRas GTPase-activating 4 OS=Homo sapiens GN=RASA4 PE=2 SV=2	173	sp|O43374|RASL2_HUMANRas GTPase-activating protein 4 OS=Homo sapiens GN=RASA4 PE=2 SV=2	O43374	1.08658e-111	78	339.347	219	173
A0A1B0GVI7	AHR_HUMANAryl hydrocarbon receptor OS=Homo sapiens GN=AHR PE=1 SV=2	797	sp|P35869|AHR_HUMANAryl hydrocarbon receptor OS=Homo sapiens GN=AHR PE=1 SV=2	P35869	0	99	1658.27	796	793
Q4G148	GXLT1_HUMANGlucoside xylosyltransferase 1 OS=Homo sapiens GN=GXYLT1 PE=1 SV=2	440	sp|Q4G148|GXLT1_HUMANGlucoside xylosyltransferase 1 OS=Homo sapiens GN=GXYLT1 PE=1 SV=2	Q4G148	0	100	924.08	440	440
Q05BX6	RABE1_HUMANRab GTPase-binding effector 1 OS=Homo sapiens GN=RABEP1 PE=1 SV=2	716	sp|Q15276|RABE1_HUMANRab GTPase-binding effector protein 1 OS=Homo sapiens GN=RABEP1 PE=1 SV=2	Q15276	0	99	1439.48	720	713
B4DXI2	BRD9_HUMANBromodomain-containing 9 OS=Homo sapiens GN=BRD9 PE=1 SV=2	214	sp|Q9H8M2|BRD9_HUMANBromodomain-containing protein 9 OS=Homo sapiens GN=BRD9 PE=1 SV=2	Q9H8M2	1.62921e-136	100	399.438	189	189
Q9BYH2	XCT_HUMANCystine glutamate transporter OS=Homo sapiens GN=SLC7A11 PE=1 SV=1	494	sp|Q9UPY5|XCT_HUMANCystine/glutamate transporter OS=Homo sapiens GN=SLC7A11 PE=1 SV=1	Q9UPY5	0	100	969.918	481	481
B7ZL14	FNBP1_HUMANFormin-binding 1 OS=Homo sapiens GN=FNBP1 PE=1 SV=2	551	sp|Q96RU3|FNBP1_HUMANFormin-binding protein 1 OS=Homo sapiens GN=FNBP1 PE=1 SV=2	Q96RU3	0	87	1028.47	617	538

## Sheet: protein2go
GO function annotation and analysis different expressed proteins of ACBP vs. control protein2go
SeqName	Hit_Desc	GO_Group	GO_ID	Term
G3V1D1	FRIH_HUMANFerritin heavy chain OS=Homo sapiens GN=FTH1 PE=1 SV=2	C	GO:0005634	nucleus
G3V1D1	FRIH_HUMANFerritin heavy chain OS=Homo sapiens GN=FTH1 PE=1 SV=2	C	GO:0005829	cytosol
G3V1D1	FRIH_HUMANFerritin heavy chain OS=Homo sapiens GN=FTH1 PE=1 SV=2	C	GO:0008043	intracellular ferritin complex
G3V1D1	FRIH_HUMANFerritin heavy chain OS=Homo sapiens GN=FTH1 PE=1 SV=2	C	GO:0070062	extracellular vesicular exosome
G3V1D1	FRIH_HUMANFerritin heavy chain OS=Homo sapiens GN=FTH1 PE=1 SV=2	F	GO:0005515	protein binding
G3V1D1	FRIH_HUMANFerritin heavy chain OS=Homo sapiens GN=FTH1 PE=1 SV=2	F	GO:0008199	ferric iron binding
G3V1D1	FRIH_HUMANFerritin heavy chain OS=Homo sapiens GN=FTH1 PE=1 SV=2	P	GO:0006826	iron ion transport
G3V1D1	FRIH_HUMANFerritin heavy chain OS=Homo sapiens GN=FTH1 PE=1 SV=2	P	GO:0006880	intracellular sequestering of iron ion
G3V1D1	FRIH_HUMANFerritin heavy chain OS=Homo sapiens GN=FTH1 PE=1 SV=2	P	GO:0008284	positive regulation of cell proliferation
G3V1D1	FRIH_HUMANFerritin heavy chain OS=Homo sapiens GN=FTH1 PE=1 SV=2	P	GO:0048147	negative regulation of fibroblast proliferation
G3V1D1	FRIH_HUMANFerritin heavy chain OS=Homo sapiens GN=FTH1 PE=1 SV=2	N	GO:1904231
G3V1D1	FRIH_HUMANFerritin heavy chain OS=Homo sapiens GN=FTH1 PE=1 SV=2	N	GO:1904234
Q9UDW1	QCR9_HUMANCytochrome b-c1 complex subunit 9 OS=Homo sapiens GN=UQCR10 PE=1 SV=3	C	GO:0005750	mitochondrial respiratory chain complex III
Q9UDW1	QCR9_HUMANCytochrome b-c1 complex subunit 9 OS=Homo sapiens GN=UQCR10 PE=1 SV=3	C	GO:0070062	extracellular vesicular exosome
Q9UDW1	QCR9_HUMANCytochrome b-c1 complex subunit 9 OS=Homo sapiens GN=UQCR10 PE=1 SV=3	P	GO:0006122	mitochondrial electron transport, ubiquinol to cytochrome c
Q96AE4	FUBP1_HUMANFar upstream element-binding 1 OS=Homo sapiens GN=FUBP1 PE=1 SV=3	C	GO:0005654	nucleoplasm
Q96AE4	FUBP1_HUMANFar upstream element-binding 1 OS=Homo sapiens GN=FUBP1 PE=1 SV=3	C	GO:0005737	cytoplasm
Q96AE4	FUBP1_HUMANFar upstream element-binding 1 OS=Homo sapiens GN=FUBP1 PE=1 SV=3	F	GO:0003697	single-stranded DNA binding
Q96AE4	FUBP1_HUMANFar upstream element-binding 1 OS=Homo sapiens GN=FUBP1 PE=1 SV=3	F	GO:0003700	sequence-specific DNA binding transcription factor activity
Q96AE4	FUBP1_HUMANFar upstream element-binding 1 OS=Homo sapiens GN=FUBP1 PE=1 SV=3	F	GO:0005515	protein binding
Q96AE4	FUBP1_HUMANFar upstream element-binding 1 OS=Homo sapiens GN=FUBP1 PE=1 SV=3	N	GO:0044822
Q96AE4	FUBP1_HUMANFar upstream element-binding 1 OS=Homo sapiens GN=FUBP1 PE=1 SV=3	P	GO:0006366	transcription from RNA polymerase II promoter
Q96AE4	FUBP1_HUMANFar upstream element-binding 1 OS=Homo sapiens GN=FUBP1 PE=1 SV=3	P	GO:0010628	positive regulation of gene expression
Q96AE4	FUBP1_HUMANFar upstream element-binding 1 OS=Homo sapiens GN=FUBP1 PE=1 SV=3	P	GO:2000112	regulation of cellular macromolecule biosynthetic process
Q96AE4	FUBP1_HUMANFar upstream element-binding 1 OS=Homo sapiens GN=FUBP1 PE=1 SV=3	C	GO:0005667	transcription factor complex
Q96AE4	FUBP1_HUMANFar upstream element-binding 1 OS=Homo sapiens GN=FUBP1 PE=1 SV=3	P	GO:0045449	regulation of transcription, DNA-dependent
K7ER90	EIF3G_HUMANEukaryotic translation initiation factor 3 subunit G OS=Homo sapiens GN=EIF3G PE=1 SV=2	C	GO:0005634	nucleus
K7ER90	EIF3G_HUMANEukaryotic translation initiation factor 3 subunit G OS=Homo sapiens GN=EIF3G PE=1 SV=2	C	GO:0005852	eukaryotic translation initiation factor 3 complex
K7ER90	EIF3G_HUMANEukaryotic translation initiation factor 3 subunit G OS=Homo sapiens GN=EIF3G PE=1 SV=2	F	GO:0000166	nucleotide binding
K7ER90	EIF3G_HUMANEukaryotic translation initiation factor 3 subunit G OS=Homo sapiens GN=EIF3G PE=1 SV=2	F	GO:0003743	translation initiation factor activity
K7ER90	EIF3G_HUMANEukaryotic translation initiation factor 3 subunit G OS=Homo sapiens GN=EIF3G PE=1 SV=2	F	GO:0005515	protein binding
K7ER90	EIF3G_HUMANEukaryotic translation initiation factor 3 subunit G OS=Homo sapiens GN=EIF3G PE=1 SV=2	N	GO:0044822
K7ER90	EIF3G_HUMANEukaryotic translation initiation factor 3 subunit G OS=Homo sapiens GN=EIF3G PE=1 SV=2	P	GO:0075525	viral translational termination-reinitiation
K7ER90	EIF3G_HUMANEukaryotic translation initiation factor 3 subunit G OS=Homo sapiens GN=EIF3G PE=1 SV=2	C	GO:0005840	ribosome
K7ER90	EIF3G_HUMANEukaryotic translation initiation factor 3 subunit G OS=Homo sapiens GN=EIF3G PE=1 SV=2	P	GO:0006446	regulation of translational initiation
B4DUP5	EI2BD_HUMANTranslation initiation factor eIF-2B subunit delta OS=Homo sapiens GN=EIF2B4 PE=1 SV=2	C	GO:0005829	cytosol
B4DUP5	EI2BD_HUMANTranslation initiation factor eIF-2B subunit delta OS=Homo sapiens GN=EIF2B4 PE=1 SV=2	C	GO:0005851	eukaryotic translation initiation factor 2B complex
B4DUP5	EI2BD_HUMANTranslation initiation factor eIF-2B subunit delta OS=Homo sapiens GN=EIF2B4 PE=1 SV=2	F	GO:0003743	translation initiation factor activity
B4DUP5	EI2BD_HUMANTranslation initiation factor eIF-2B subunit delta OS=Homo sapiens GN=EIF2B4 PE=1 SV=2	F	GO:0005085	guanyl-nucleotide exchange factor activity
B4DUP5	EI2BD_HUMANTranslation initiation factor eIF-2B subunit delta OS=Homo sapiens GN=EIF2B4 PE=1 SV=2	F	GO:0005515	protein binding
B4DUP5	EI2BD_HUMANTranslation initiation factor eIF-2B subunit delta OS=Homo sapiens GN=EIF2B4 PE=1 SV=2	P	GO:0001541	ovarian follicle development
B4DUP5	EI2BD_HUMANTranslation initiation factor eIF-2B subunit delta OS=Homo sapiens GN=EIF2B4 PE=1 SV=2	P	GO:0006417	regulation of translation
B4DUP5	EI2BD_HUMANTranslation initiation factor eIF-2B subunit delta OS=Homo sapiens GN=EIF2B4 PE=1 SV=2	P	GO:0009408	response to heat
B4DUP5	EI2BD_HUMANTranslation initiation factor eIF-2B subunit delta OS=Homo sapiens GN=EIF2B4 PE=1 SV=2	P	GO:0014003	oligodendrocyte development
B4DUP5	EI2BD_HUMANTranslation initiation factor eIF-2B subunit delta OS=Homo sapiens GN=EIF2B4 PE=1 SV=2	P	GO:0042552	myelination
B4DUP5	EI2BD_HUMANTranslation initiation factor eIF-2B subunit delta OS=Homo sapiens GN=EIF2B4 PE=1 SV=2	P	GO:0051716	cellular response to stimulus
B4DUP5	EI2BD_HUMANTranslation initiation factor eIF-2B subunit delta OS=Homo sapiens GN=EIF2B4 PE=1 SV=2	C	GO:0005840	ribosome
B4DUP5	EI2BD_HUMANTranslation initiation factor eIF-2B subunit delta OS=Homo sapiens GN=EIF2B4 PE=1 SV=2	P	GO:0006446	regulation of translational initiation
B4DUP5	EI2BD_HUMANTranslation initiation factor eIF-2B subunit delta OS=Homo sapiens GN=EIF2B4 PE=1 SV=2	P	GO:0043087	regulation of GTPase activity
Q16678	CP1B1_HUMANCytochrome P450 1B1 OS=Homo sapiens GN=CYP1B1 PE=1 SV=2	C	GO:0005789	endoplasmic reticulum membrane
Q16678	CP1B1_HUMANCytochrome P450 1B1 OS=Homo sapiens GN=CYP1B1 PE=1 SV=2	F	GO:0005506	iron ion binding
Q16678	CP1B1_HUMANCytochrome P450 1B1 OS=Homo sapiens GN=CYP1B1 PE=1 SV=2	F	GO:0016712	oxidoreductase activity, acting on paired donors, with incorporation or reduction of molecular oxygen, reduced flavin or flavoprotein as one donor, and incorporation of one atom of oxygen
Q16678	CP1B1_HUMANCytochrome P450 1B1 OS=Homo sapiens GN=CYP1B1 PE=1 SV=2	F	GO:0019825	oxygen binding
Q16678	CP1B1_HUMANCytochrome P450 1B1 OS=Homo sapiens GN=CYP1B1 PE=1 SV=2	F	GO:0020037	heme binding
Q16678	CP1B1_HUMANCytochrome P450 1B1 OS=Homo sapiens GN=CYP1B1 PE=1 SV=2	P	GO:0006725	cellular aromatic compound metabolic process
Q16678	CP1B1_HUMANCytochrome P450 1B1 OS=Homo sapiens GN=CYP1B1 PE=1 SV=2	P	GO:0006805	xenobiotic metabolic process
Q16678	CP1B1_HUMANCytochrome P450 1B1 OS=Homo sapiens GN=CYP1B1 PE=1 SV=2	P	GO:0007155	cell adhesion
Q16678	CP1B1_HUMANCytochrome P450 1B1 OS=Homo sapiens GN=CYP1B1 PE=1 SV=2	P	GO:0007601	visual perception
Q16678	CP1B1_HUMANCytochrome P450 1B1 OS=Homo sapiens GN=CYP1B1 PE=1 SV=2	P	GO:0008210	estrogen metabolic process
Q16678	CP1B1_HUMANCytochrome P450 1B1 OS=Homo sapiens GN=CYP1B1 PE=1 SV=2	P	GO:0009888	tissue development
Q16678	CP1B1_HUMANCytochrome P450 1B1 OS=Homo sapiens GN=CYP1B1 PE=1 SV=2	P	GO:0010035	response to inorganic substance
Q16678	CP1B1_HUMANCytochrome P450 1B1 OS=Homo sapiens GN=CYP1B1 PE=1 SV=2	P	GO:0010468	regulation of gene expression
Q16678	CP1B1_HUMANCytochrome P450 1B1 OS=Homo sapiens GN=CYP1B1 PE=1 SV=2	P	GO:0016042	lipid catabolic process
Q16678	CP1B1_HUMANCytochrome P450 1B1 OS=Homo sapiens GN=CYP1B1 PE=1 SV=2	P	GO:0016125	sterol metabolic process
Q16678	CP1B1_HUMANCytochrome P450 1B1 OS=Homo sapiens GN=CYP1B1 PE=1 SV=2	P	GO:0019373	epoxygenase P450 pathway
Q16678	CP1B1_HUMANCytochrome P450 1B1 OS=Homo sapiens GN=CYP1B1 PE=1 SV=2	P	GO:0019748	secondary metabolic process
Q16678	CP1B1_HUMANCytochrome P450 1B1 OS=Homo sapiens GN=CYP1B1 PE=1 SV=2	P	GO:0031323	regulation of cellular metabolic process
Q16678	CP1B1_HUMANCytochrome P450 1B1 OS=Homo sapiens GN=CYP1B1 PE=1 SV=2	P	GO:0034599	cellular response to oxidative stress
Q16678	CP1B1_HUMANCytochrome P450 1B1 OS=Homo sapiens GN=CYP1B1 PE=1 SV=2	P	GO:0034641	cellular nitrogen compound metabolic process
Q16678	CP1B1_HUMANCytochrome P450 1B1 OS=Homo sapiens GN=CYP1B1 PE=1 SV=2	P	GO:0042572	retinol metabolic process
Q16678	CP1B1_HUMANCytochrome P450 1B1 OS=Homo sapiens GN=CYP1B1 PE=1 SV=2	P	GO:0042574	retinal metabolic process
Q16678	CP1B1_HUMANCytochrome P450 1B1 OS=Homo sapiens GN=CYP1B1 PE=1 SV=2	P	GO:0044248	cellular catabolic process
Q16678	CP1B1_HUMANCytochrome P450 1B1 OS=Homo sapiens GN=CYP1B1 PE=1 SV=2	P	GO:0044249	cellular biosynthetic process
Q16678	CP1B1_HUMANCytochrome P450 1B1 OS=Homo sapiens GN=CYP1B1 PE=1 SV=2	P	GO:0048514	blood vessel morphogenesis
Q16678	CP1B1_HUMANCytochrome P450 1B1 OS=Homo sapiens GN=CYP1B1 PE=1 SV=2	P	GO:0048522	positive regulation of cellular process
Q16678	CP1B1_HUMANCytochrome P450 1B1 OS=Homo sapiens GN=CYP1B1 PE=1 SV=2	P	GO:0048523	negative regulation of cellular process
Q16678	CP1B1_HUMANCytochrome P450 1B1 OS=Homo sapiens GN=CYP1B1 PE=1 SV=2	P	GO:0051240	positive regulation of multicellular organismal process
Q16678	CP1B1_HUMANCytochrome P450 1B1 OS=Homo sapiens GN=CYP1B1 PE=1 SV=2	P	GO:0055114	oxidation-reduction process
Q16678	CP1B1_HUMANCytochrome P450 1B1 OS=Homo sapiens GN=CYP1B1 PE=1 SV=2	P	GO:0061298	retina vasculature development in camera-type eye
Q16678	CP1B1_HUMANCytochrome P450 1B1 OS=Homo sapiens GN=CYP1B1 PE=1 SV=2	P	GO:0071407	cellular response to organic cyclic compound
Q16678	CP1B1_HUMANCytochrome P450 1B1 OS=Homo sapiens GN=CYP1B1 PE=1 SV=2	P	GO:0097267	omega-hydroxylase P450 pathway
Q16678	CP1B1_HUMANCytochrome P450 1B1 OS=Homo sapiens GN=CYP1B1 PE=1 SV=2	P	GO:1901700	response to oxygen-containing compound
Q16678	CP1B1_HUMANCytochrome P450 1B1 OS=Homo sapiens GN=CYP1B1 PE=1 SV=2	N	GO:1903409
Q16678	CP1B1_HUMANCytochrome P450 1B1 OS=Homo sapiens GN=CYP1B1 PE=1 SV=2	P	GO:0006118	electron transport
A0A0J9YX89	SEP15_HUMAN15 kDa seleno OS=Homo sapiens GN=SEP15 PE=1 SV=3	C	GO:0043227	membrane-bounded organelle
Q5JSB5	TFDP1_HUMANTranscription factor Dp-1 OS=Homo sapiens GN=TFDP1 PE=1 SV=1	C	GO:0005654	nucleoplasm
Q5JSB5	TFDP1_HUMANTranscription factor Dp-1 OS=Homo sapiens GN=TFDP1 PE=1 SV=1	C	GO:0005667	transcription factor complex
Q5JSB5	TFDP1_HUMANTranscription factor Dp-1 OS=Homo sapiens GN=TFDP1 PE=1 SV=1	C	GO:0005737	cytoplasm
Q5JSB5	TFDP1_HUMANTranscription factor Dp-1 OS=Homo sapiens GN=TFDP1 PE=1 SV=1	F	GO:0003700	sequence-specific DNA binding transcription factor activity
Q5JSB5	TFDP1_HUMANTranscription factor Dp-1 OS=Homo sapiens GN=TFDP1 PE=1 SV=1	F	GO:0003713	transcription coactivator activity
Q5JSB5	TFDP1_HUMANTranscription factor Dp-1 OS=Homo sapiens GN=TFDP1 PE=1 SV=1	F	GO:0008134	transcription factor binding
Q5JSB5	TFDP1_HUMANTranscription factor Dp-1 OS=Homo sapiens GN=TFDP1 PE=1 SV=1	F	GO:0019904	protein domain specific binding
Q5JSB5	TFDP1_HUMANTranscription factor Dp-1 OS=Homo sapiens GN=TFDP1 PE=1 SV=1	P	GO:0000080	G1 phase of mitotic cell cycle
Q5JSB5	TFDP1_HUMANTranscription factor Dp-1 OS=Homo sapiens GN=TFDP1 PE=1 SV=1	P	GO:0006977	DNA damage response, signal transduction by p53 class mediator resulting in cell cycle arrest
Q5JSB5	TFDP1_HUMANTranscription factor Dp-1 OS=Homo sapiens GN=TFDP1 PE=1 SV=1	P	GO:0008283	cell proliferation
Q5JSB5	TFDP1_HUMANTranscription factor Dp-1 OS=Homo sapiens GN=TFDP1 PE=1 SV=1	P	GO:0045944	positive regulation of transcription from RNA polymerase II promoter
Q5JSB5	TFDP1_HUMANTranscription factor Dp-1 OS=Homo sapiens GN=TFDP1 PE=1 SV=1	P	GO:1900740	positive regulation of protein insertion into mitochondrial membrane involved in apoptotic signaling pathway
Q5JSB5	TFDP1_HUMANTranscription factor Dp-1 OS=Homo sapiens GN=TFDP1 PE=1 SV=1	P	GO:0045449	regulation of transcription, DNA-dependent
Q5JSB5	TFDP1_HUMANTranscription factor Dp-1 OS=Homo sapiens GN=TFDP1 PE=1 SV=1	P	GO:0045941	positive regulation of transcription, DNA-dependent
M0R2S3	CCD94_HUMANCoiled-coil domain-containing 94 OS=Homo sapiens GN=CCDC94 PE=1 SV=1	F	GO:0005515	protein binding
Q53EY9	FBX22_HUMANF-box only 22 OS=Homo sapiens GN=FBXO22 PE=1 SV=1	F	GO:0004842	ubiquitin-protein ligase activity
Q53EY9	FBX22_HUMANF-box only 22 OS=Homo sapiens GN=FBXO22 PE=1 SV=1	F	GO:0005515	protein binding
Q53EY9	FBX22_HUMANF-box only 22 OS=Homo sapiens GN=FBXO22 PE=1 SV=1	P	GO:0006511	ubiquitin-dependent protein catabolic process
Q53EY9	FBX22_HUMANF-box only 22 OS=Homo sapiens GN=FBXO22 PE=1 SV=1	P	GO:0016567	protein ubiquitination
B4DWS8	RASL2_HUMANRas GTPase-activating 4 OS=Homo sapiens GN=RASA4 PE=2 SV=2	C	GO:0005737	cytoplasm
B4DWS8	RASL2_HUMANRas GTPase-activating 4 OS=Homo sapiens GN=RASA4 PE=2 SV=2	C	GO:0016020	membrane
B4DWS8	RASL2_HUMANRas GTPase-activating 4 OS=Homo sapiens GN=RASA4 PE=2 SV=2	P	GO:0035556	intracellular signal transduction
B4DWS8	RASL2_HUMANRas GTPase-activating 4 OS=Homo sapiens GN=RASA4 PE=2 SV=2	P	GO:0043087	regulation of GTPase activity
A0A1B0GVI7	AHR_HUMANAryl hydrocarbon receptor OS=Homo sapiens GN=AHR PE=1 SV=2	C	GO:0005654	nucleoplasm
A0A1B0GVI7	AHR_HUMANAryl hydrocarbon receptor OS=Homo sapiens GN=AHR PE=1 SV=2	C	GO:0005667	transcription factor complex
A0A1B0GVI7	AHR_HUMANAryl hydrocarbon receptor OS=Homo sapiens GN=AHR PE=1 SV=2	C	GO:0034752	cytosolic aryl hydrocarbon receptor complex
A0A1B0GVI7	AHR_HUMANAryl hydrocarbon receptor OS=Homo sapiens GN=AHR PE=1 SV=2	F	GO:0004874	aryl hydrocarbon receptor activity
A0A1B0GVI7	AHR_HUMANAryl hydrocarbon receptor OS=Homo sapiens GN=AHR PE=1 SV=2	F	GO:0004879	ligand-activated sequence-specific DNA binding RNA polymerase II transcription factor activity
A0A1B0GVI7	AHR_HUMANAryl hydrocarbon receptor OS=Homo sapiens GN=AHR PE=1 SV=2	F	GO:0008134	transcription factor binding
A0A1B0GVI7	AHR_HUMANAryl hydrocarbon receptor OS=Homo sapiens GN=AHR PE=1 SV=2	F	GO:0035326	enhancer binding
A0A1B0GVI7	AHR_HUMANAryl hydrocarbon receptor OS=Homo sapiens GN=AHR PE=1 SV=2	F	GO:0046982	protein heterodimerization activity
A0A1B0GVI7	AHR_HUMANAryl hydrocarbon receptor OS=Homo sapiens GN=AHR PE=1 SV=2	F	GO:0051879	Hsp90 protein binding
A0A1B0GVI7	AHR_HUMANAryl hydrocarbon receptor OS=Homo sapiens GN=AHR PE=1 SV=2	P	GO:0001568	blood vessel development
A0A1B0GVI7	AHR_HUMANAryl hydrocarbon receptor OS=Homo sapiens GN=AHR PE=1 SV=2	P	GO:0006805	xenobiotic metabolic process
A0A1B0GVI7	AHR_HUMANAryl hydrocarbon receptor OS=Homo sapiens GN=AHR PE=1 SV=2	P	GO:0006915	apoptotic process
A0A1B0GVI7	AHR_HUMANAryl hydrocarbon receptor OS=Homo sapiens GN=AHR PE=1 SV=2	P	GO:0006950	response to stress
A0A1B0GVI7	AHR_HUMANAryl hydrocarbon receptor OS=Homo sapiens GN=AHR PE=1 SV=2	P	GO:0009628	response to abiotic stimulus
A0A1B0GVI7	AHR_HUMANAryl hydrocarbon receptor OS=Homo sapiens GN=AHR PE=1 SV=2	P	GO:0009636	response to toxic substance
A0A1B0GVI7	AHR_HUMANAryl hydrocarbon receptor OS=Homo sapiens GN=AHR PE=1 SV=2	P	GO:0009719	response to endogenous stimulus
A0A1B0GVI7	AHR_HUMANAryl hydrocarbon receptor OS=Homo sapiens GN=AHR PE=1 SV=2	P	GO:0014070	response to organic cyclic compound
A0A1B0GVI7	AHR_HUMANAryl hydrocarbon receptor OS=Homo sapiens GN=AHR PE=1 SV=2	P	GO:0022414	reproductive process
A0A1B0GVI7	AHR_HUMANAryl hydrocarbon receptor OS=Homo sapiens GN=AHR PE=1 SV=2	P	GO:0030888	regulation of B cell proliferation
A0A1B0GVI7	AHR_HUMANAryl hydrocarbon receptor OS=Homo sapiens GN=AHR PE=1 SV=2	P	GO:0033993	response to lipid
A0A1B0GVI7	AHR_HUMANAryl hydrocarbon receptor OS=Homo sapiens GN=AHR PE=1 SV=2	P	GO:0045944	positive regulation of transcription from RNA polymerase II promoter
A0A1B0GVI7	AHR_HUMANAryl hydrocarbon receptor OS=Homo sapiens GN=AHR PE=1 SV=2	P	GO:0048511	rhythmic process
A0A1B0GVI7	AHR_HUMANAryl hydrocarbon receptor OS=Homo sapiens GN=AHR PE=1 SV=2	P	GO:0048513	organ development
A0A1B0GVI7	AHR_HUMANAryl hydrocarbon receptor OS=Homo sapiens GN=AHR PE=1 SV=2	P	GO:0051239	regulation of multicellular organismal process
A0A1B0GVI7	AHR_HUMANAryl hydrocarbon receptor OS=Homo sapiens GN=AHR PE=1 SV=2	P	GO:0065008	regulation of biological quality
A0A1B0GVI7	AHR_HUMANAryl hydrocarbon receptor OS=Homo sapiens GN=AHR PE=1 SV=2	P	GO:0071310	cellular response to organic substance
A0A1B0GVI7	AHR_HUMANAryl hydrocarbon receptor OS=Homo sapiens GN=AHR PE=1 SV=2	P	GO:1901700	response to oxygen-containing compound
A0A1B0GVI7	AHR_HUMANAryl hydrocarbon receptor OS=Homo sapiens GN=AHR PE=1 SV=2	N	GO:1903507
A0A1B0GVI7	AHR_HUMANAryl hydrocarbon receptor OS=Homo sapiens GN=AHR PE=1 SV=2	P	GO:0007165	signal transduction
Q4G148	GXLT1_HUMANGlucoside xylosyltransferase 1 OS=Homo sapiens GN=GXYLT1 PE=1 SV=2	C	GO:0000139	Golgi membrane
Q4G148	GXLT1_HUMANGlucoside xylosyltransferase 1 OS=Homo sapiens GN=GXYLT1 PE=1 SV=2	F	GO:0030158	protein xylosyltransferase activity
Q4G148	GXLT1_HUMANGlucoside xylosyltransferase 1 OS=Homo sapiens GN=GXYLT1 PE=1 SV=2	P	GO:0016266	O-glycan processing
Q4G148	GXLT1_HUMANGlucoside xylosyltransferase 1 OS=Homo sapiens GN=GXYLT1 PE=1 SV=2	P	GO:0030206	chondroitin sulfate biosynthetic process
Q05BX6	RABE1_HUMANRab GTPase-binding effector 1 OS=Homo sapiens GN=RABEP1 PE=1 SV=2	C	GO:0005769	early endosome
Q05BX6	RABE1_HUMANRab GTPase-binding effector 1 OS=Homo sapiens GN=RABEP1 PE=1 SV=2	C	GO:0030139	endocytic vesicle
Q05BX6	RABE1_HUMANRab GTPase-binding effector 1 OS=Homo sapiens GN=RABEP1 PE=1 SV=2	F	GO:0005096	GTPase activator activity
Q05BX6	RABE1_HUMANRab GTPase-binding effector 1 OS=Homo sapiens GN=RABEP1 PE=1 SV=2	F	GO:0008083	growth factor activity
Q05BX6	RABE1_HUMANRab GTPase-binding effector 1 OS=Homo sapiens GN=RABEP1 PE=1 SV=2	F	GO:0042803	protein homodimerization activity
Q05BX6	RABE1_HUMANRab GTPase-binding effector 1 OS=Homo sapiens GN=RABEP1 PE=1 SV=2	P	GO:0006897	endocytosis
Q05BX6	RABE1_HUMANRab GTPase-binding effector 1 OS=Homo sapiens GN=RABEP1 PE=1 SV=2	P	GO:0061025	membrane fusion
Q05BX6	RABE1_HUMANRab GTPase-binding effector 1 OS=Homo sapiens GN=RABEP1 PE=1 SV=2	P	GO:0007165	signal transduction
Q05BX6	RABE1_HUMANRab GTPase-binding effector 1 OS=Homo sapiens GN=RABEP1 PE=1 SV=2	P	GO:0008283	cell proliferation
Q05BX6	RABE1_HUMANRab GTPase-binding effector 1 OS=Homo sapiens GN=RABEP1 PE=1 SV=2	P	GO:0040007	growth
B4DXI2	BRD9_HUMANBromodomain-containing 9 OS=Homo sapiens GN=BRD9 PE=1 SV=2	C	GO:0005654	nucleoplasm
B4DXI2	BRD9_HUMANBromodomain-containing 9 OS=Homo sapiens GN=BRD9 PE=1 SV=2	C	GO:0005737	cytoplasm
B4DXI2	BRD9_HUMANBromodomain-containing 9 OS=Homo sapiens GN=BRD9 PE=1 SV=2	F	GO:0003712	transcription cofactor activity
B4DXI2	BRD9_HUMANBromodomain-containing 9 OS=Homo sapiens GN=BRD9 PE=1 SV=2	F	GO:0044212	transcription regulatory region DNA binding
B4DXI2	BRD9_HUMANBromodomain-containing 9 OS=Homo sapiens GN=BRD9 PE=1 SV=2	F	GO:0070577	histone acetyl-lysine binding
B4DXI2	BRD9_HUMANBromodomain-containing 9 OS=Homo sapiens GN=BRD9 PE=1 SV=2	P	GO:0006325	chromatin organization
B4DXI2	BRD9_HUMANBromodomain-containing 9 OS=Homo sapiens GN=BRD9 PE=1 SV=2	P	GO:0006357	regulation of transcription from RNA polymerase II promoter
B4DXI2	BRD9_HUMANBromodomain-containing 9 OS=Homo sapiens GN=BRD9 PE=1 SV=2	P	GO:0010948	negative regulation of cell cycle process
B4DXI2	BRD9_HUMANBromodomain-containing 9 OS=Homo sapiens GN=BRD9 PE=1 SV=2	P	GO:0031399	regulation of protein modification process
B4DXI2	BRD9_HUMANBromodomain-containing 9 OS=Homo sapiens GN=BRD9 PE=1 SV=2	P	GO:0045892	negative regulation of transcription, DNA-dependent
B4DXI2	BRD9_HUMANBromodomain-containing 9 OS=Homo sapiens GN=BRD9 PE=1 SV=2	P	GO:0045893	positive regulation of transcription, DNA-dependent
B4DXI2	BRD9_HUMANBromodomain-containing 9 OS=Homo sapiens GN=BRD9 PE=1 SV=2	P	GO:0048583	regulation of response to stimulus
B4DXI2	BRD9_HUMANBromodomain-containing 9 OS=Homo sapiens GN=BRD9 PE=1 SV=2	P	GO:1901990	regulation of mitotic cell cycle phase transition
B4DXI2	BRD9_HUMANBromodomain-containing 9 OS=Homo sapiens GN=BRD9 PE=1 SV=2	C	GO:0005667	transcription factor complex
B4DXI2	BRD9_HUMANBromodomain-containing 9 OS=Homo sapiens GN=BRD9 PE=1 SV=2	P	GO:0045449	regulation of transcription, DNA-dependent
Q9BYH2	XCT_HUMANCystine glutamate transporter OS=Homo sapiens GN=SLC7A11 PE=1 SV=1	C	GO:0009986	cell surface
Q9BYH2	XCT_HUMANCystine glutamate transporter OS=Homo sapiens GN=SLC7A11 PE=1 SV=1	C	GO:0016021	integral to membrane
Q9BYH2	XCT_HUMANCystine glutamate transporter OS=Homo sapiens GN=SLC7A11 PE=1 SV=1	C	GO:0043226	organelle
Q9BYH2	XCT_HUMANCystine glutamate transporter OS=Homo sapiens GN=SLC7A11 PE=1 SV=1	C	GO:0044424	intracellular part
Q9BYH2	XCT_HUMANCystine glutamate transporter OS=Homo sapiens GN=SLC7A11 PE=1 SV=1	C	GO:0044459	plasma membrane part
Q9BYH2	XCT_HUMANCystine glutamate transporter OS=Homo sapiens GN=SLC7A11 PE=1 SV=1	F	GO:0005515	protein binding
Q9BYH2	XCT_HUMANCystine glutamate transporter OS=Homo sapiens GN=SLC7A11 PE=1 SV=1	F	GO:0015327	cystine:glutamate antiporter activity
Q9BYH2	XCT_HUMANCystine glutamate transporter OS=Homo sapiens GN=SLC7A11 PE=1 SV=1	P	GO:0003333	amino acid transmembrane transport
Q9BYH2	XCT_HUMANCystine glutamate transporter OS=Homo sapiens GN=SLC7A11 PE=1 SV=1	P	GO:0007275	multicellular organismal development
Q9BYH2	XCT_HUMANCystine glutamate transporter OS=Homo sapiens GN=SLC7A11 PE=1 SV=1	P	GO:0009636	response to toxic substance
Q9BYH2	XCT_HUMANCystine glutamate transporter OS=Homo sapiens GN=SLC7A11 PE=1 SV=1	P	GO:0050900	leukocyte migration
Q9BYH2	XCT_HUMANCystine glutamate transporter OS=Homo sapiens GN=SLC7A11 PE=1 SV=1	P	GO:0015804	neutral amino acid transport
Q9BYH2	XCT_HUMANCystine glutamate transporter OS=Homo sapiens GN=SLC7A11 PE=1 SV=1	P	GO:0015811	L-cystine transport
Q9BYH2	XCT_HUMANCystine glutamate transporter OS=Homo sapiens GN=SLC7A11 PE=1 SV=1	P	GO:0015813	L-glutamate transport
Q9BYH2	XCT_HUMANCystine glutamate transporter OS=Homo sapiens GN=SLC7A11 PE=1 SV=1	P	GO:0015846	polyamine transport
B7ZL14	FNBP1_HUMANFormin-binding 1 OS=Homo sapiens GN=FNBP1 PE=1 SV=2	C	GO:0043231	intracellular membrane-bounded organelle
B7ZL14	FNBP1_HUMANFormin-binding 1 OS=Homo sapiens GN=FNBP1 PE=1 SV=2	C	GO:0044444	cytoplasmic part
B7ZL14	FNBP1_HUMANFormin-binding 1 OS=Homo sapiens GN=FNBP1 PE=1 SV=2	F	GO:0042802	identical protein binding
B7ZL14	FNBP1_HUMANFormin-binding 1 OS=Homo sapiens GN=FNBP1 PE=1 SV=2	P	GO:0006897	endocytosis
B7ZL14	FNBP1_HUMANFormin-binding 1 OS=Homo sapiens GN=FNBP1 PE=1 SV=2	P	GO:0006996	organelle organization
B7ZL14	FNBP1_HUMANFormin-binding 1 OS=Homo sapiens GN=FNBP1 PE=1 SV=2	P	GO:0044763	single-organism cellular process
B7ZL14	FNBP1_HUMANFormin-binding 1 OS=Homo sapiens GN=FNBP1 PE=1 SV=2	P	GO:0050794	regulation of cellular process

## Sheet: BP
GO function annotation and analysis different expressed proteins of ACBP vs. control BP
Level	GO_ID	Term	Type	Seqs_Num	Sequences
1	GO:0008150	biological_process	Biological Process	15	Q16678, Q5JSB5, Q4G148, G3V1D1, Q53EY9, Q9BYH2, Q9UDW1, B4DXI2, K7ER90, A0A1B0GVI7, B4DUP5, B4DWS8, Q96AE4, B7ZL14, Q05BX6
2	GO:0040007	growth	Biological Process	1	Q05BX6
2	GO:0032502	developmental process	Biological Process	4	Q9BYH2, B4DUP5, A0A1B0GVI7, Q16678
2	GO:0023052	signaling	Biological Process	4	A0A1B0GVI7, Q5JSB5, B4DWS8, Q05BX6
2	GO:0022414	reproductive process	Biological Process	2	B4DUP5, A0A1B0GVI7
2	GO:0000003	reproduction	Biological Process	2	A0A1B0GVI7, B4DUP5
2	GO:0044848	biological phase	Biological Process	1	Q5JSB5
2	GO:0048511	rhythmic process	Biological Process	2	B4DUP5, A0A1B0GVI7
2	GO:0008152	metabolic process	Biological Process	11	Q9UDW1, B4DXI2, K7ER90, B4DUP5, A0A1B0GVI7, Q16678, Q5JSB5, Q96AE4, Q4G148, G3V1D1, Q53EY9
2	GO:0032501	multicellular organismal process	Biological Process	4	Q9BYH2, B4DUP5, A0A1B0GVI7, Q16678
2	GO:0044699	single-organism process	Biological Process	12	Q16678, Q5JSB5, Q4G148, G3V1D1, Q9BYH2, Q9UDW1, B4DXI2, A0A1B0GVI7, B4DUP5, B4DWS8, B7ZL14, Q05BX6
2	GO:0050896	response to stimulus	Biological Process	8	Q9BYH2, B4DXI2, B4DUP5, A0A1B0GVI7, Q16678, Q5JSB5, B4DWS8, Q05BX6
2	GO:0002376	immune system process	Biological Process	2	Q9BYH2, A0A1B0GVI7
2	GO:0048519	negative regulation of biological process	Biological Process	5	B4DXI2, A0A1B0GVI7, Q16678, Q5JSB5, G3V1D1
2	GO:0071840	cellular component organization or biogenesis	Biological Process	4	B4DXI2, Q5JSB5, B7ZL14, Q05BX6
2	GO:0065007	biological regulation	Biological Process	11	B4DXI2, K7ER90, A0A1B0GVI7, B4DUP5, Q16678, Q5JSB5, B4DWS8, Q96AE4, G3V1D1, B7ZL14, Q05BX6
2	GO:0040011	locomotion	Biological Process	1	Q9BYH2
2	GO:0009987	cellular process	Biological Process	15	Q16678, Q5JSB5, Q4G148, G3V1D1, Q53EY9, Q9BYH2, Q9UDW1, B4DXI2, K7ER90, B4DUP5, A0A1B0GVI7, B4DWS8, Q96AE4, B7ZL14, Q05BX6
2	GO:0051179	localization	Biological Process	5	Q9BYH2, Q5JSB5, G3V1D1, B7ZL14, Q05BX6
2	GO:0022610	biological adhesion	Biological Process	1	Q16678
2	GO:0050789	regulation of biological process	Biological Process	11	B4DXI2, K7ER90, B4DUP5, A0A1B0GVI7, Q16678, Q5JSB5, B4DWS8, Q96AE4, B7ZL14, G3V1D1, Q05BX6
2	GO:0051704	multi-organism process	Biological Process	1	K7ER90
2	GO:0048518	positive regulation of biological process	Biological Process	5	A0A1B0GVI7, Q16678, Q5JSB5, Q96AE4, G3V1D1
3	GO:0009653	anatomical structure morphogenesis	Biological Process	1	Q16678
3	GO:0048522	positive regulation of cellular process	Biological Process	4	A0A1B0GVI7, Q16678, Q5JSB5, G3V1D1
3	GO:0051235	maintenance of location	Biological Process	1	G3V1D1
3	GO:0045321	leukocyte activation	Biological Process	1	A0A1B0GVI7
3	GO:0051716	cellular response to stimulus	Biological Process	6	A0A1B0GVI7, B4DUP5, Q16678, Q5JSB5, B4DWS8, Q05BX6
3	GO:0006950	response to stress	Biological Process	4	B4DUP5, A0A1B0GVI7, Q16678, Q5JSB5
3	GO:0044707	single-multicellular organism process	Biological Process	4	Q9BYH2, B4DUP5, A0A1B0GVI7, Q16678
3	GO:0032504	multicellular organism reproduction	Biological Process	1	B4DUP5
3	GO:0044033	multi-organism metabolic process	Biological Process	1	K7ER90
3	GO:0042698	ovulation cycle	Biological Process	1	B4DUP5
3	GO:0042445	hormone metabolic process	Biological Process	1	Q16678
3	GO:0009719	response to endogenous stimulus	Biological Process	1	A0A1B0GVI7
3	GO:1903829	positive regulation of cellular protein localization	Biological Process	1	Q5JSB5
3	GO:1904951	positive regulation of establishment of protein localization	Biological Process	1	Q5JSB5
3	GO:0022402	cell cycle process	Biological Process	2	B4DXI2, Q5JSB5
3	GO:0071704	organic substance metabolic process	Biological Process	10	Q9UDW1, B4DXI2, K7ER90, B4DUP5, A0A1B0GVI7, Q16678, Q5JSB5, Q4G148, Q96AE4, Q53EY9
3	GO:0048584	positive regulation of response to stimulus	Biological Process	1	Q5JSB5
3	GO:0044763	single-organism cellular process	Biological Process	12	Q9BYH2, Q9UDW1, B4DXI2, B4DUP5, A0A1B0GVI7, Q16678, Q5JSB5, B4DWS8, Q4G148, G3V1D1, B7ZL14, Q05BX6
3	GO:0051641	cellular localization	Biological Process	2	Q5JSB5, G3V1D1
3	GO:0044764	multi-organism cellular process	Biological Process	1	K7ER90
3	GO:0009056	catabolic process	Biological Process	2	Q16678, Q53EY9
3	GO:0051234	establishment of localization	Biological Process	5	Q9BYH2, Q5JSB5, G3V1D1, B7ZL14, Q05BX6
3	GO:0065008	regulation of biological quality	Biological Process	4	A0A1B0GVI7, Q16678, Q5JSB5, G3V1D1
3	GO:0050794	regulation of cellular process	Biological Process	11	B4DXI2, K7ER90, B4DUP5, A0A1B0GVI7, Q16678, Q5JSB5, B4DWS8, Q96AE4, G3V1D1, B7ZL14, Q05BX6
3	GO:0023051	regulation of signaling	Biological Process	1	Q5JSB5
3	GO:0009892	negative regulation of metabolic process	Biological Process	2	B4DXI2, A0A1B0GVI7
3	GO:0016043	cellular component organization	Biological Process	4	B4DXI2, Q5JSB5, B7ZL14, Q05BX6
3	GO:0044702	single organism reproductive process	Biological Process	1	B4DUP5
3	GO:0048523	negative regulation of cellular process	Biological Process	5	B4DXI2, A0A1B0GVI7, Q16678, Q5JSB5, G3V1D1
3	GO:0009893	positive regulation of metabolic process	Biological Process	4	A0A1B0GVI7, Q5JSB5, Q96AE4, G3V1D1
3	GO:0022403	cell cycle phase	Biological Process	1	Q5JSB5
3	GO:0023056	positive regulation of signaling	Biological Process	1	Q5JSB5
3	GO:0048583	regulation of response to stimulus	Biological Process	2	B4DXI2, Q5JSB5
3	GO:0044419	interspecies interaction between organisms	Biological Process	1	K7ER90
3	GO:0044700	single organism signaling	Biological Process	4	A0A1B0GVI7, Q5JSB5, B4DWS8, Q05BX6
3	GO:0048609	multicellular organismal reproductive process	Biological Process	1	B4DUP5
3	GO:0048856	anatomical structure development	Biological Process	4	Q9BYH2, B4DUP5, A0A1B0GVI7, Q16678
3	GO:0050900	leukocyte migration	Biological Process	1	Q9BYH2
3	GO:0002682	regulation of immune system process	Biological Process	1	A0A1B0GVI7
3	GO:0003006	developmental process involved in reproduction	Biological Process	1	B4DUP5
3	GO:0033036	macromolecule localization	Biological Process	1	Q5JSB5
3	GO:0048870	cell motility	Biological Process	1	Q9BYH2
3	GO:0065009	regulation of molecular function	Biological Process	3	B4DUP5, B4DWS8, G3V1D1
3	GO:0051240	positive regulation of multicellular organismal process	Biological Process	1	Q16678
3	GO:0009058	biosynthetic process	Biological Process	8	B4DXI2, K7ER90, A0A1B0GVI7, B4DUP5, Q16678, Q5JSB5, Q96AE4, Q4G148
3	GO:0019222	regulation of metabolic process	Biological Process	8	B4DXI2, K7ER90, A0A1B0GVI7, B4DUP5, Q16678, Q5JSB5, Q96AE4, G3V1D1
3	GO:0022602	ovulation cycle process	Biological Process	1	B4DUP5
3	GO:0044238	primary metabolic process	Biological Process	10	Q9UDW1, B4DXI2, K7ER90, A0A1B0GVI7, B4DUP5, Q16678, Q5JSB5, Q96AE4, Q4G148, Q53EY9
3	GO:0008283	cell proliferation	Biological Process	4	A0A1B0GVI7, Q5JSB5, G3V1D1, Q05BX6
3	GO:0032879	regulation of localization	Biological Process	1	Q5JSB5
3	GO:0044710	single-organism metabolic process	Biological Process	3	Q9UDW1, Q16678, Q4G148
3	GO:1902578	single-organism localization	Biological Process	3	Q9BYH2, Q5JSB5, G3V1D1
3	GO:0006807	nitrogen compound metabolic process	Biological Process	9	Q9UDW1, B4DXI2, K7ER90, A0A1B0GVI7, B4DUP5, Q16678, Q5JSB5, Q96AE4, Q4G148
3	GO:0009628	response to abiotic stimulus	Biological Process	2	B4DUP5, A0A1B0GVI7
3	GO:0042221	response to chemical	Biological Process	3	Q9BYH2, A0A1B0GVI7, Q16678
3	GO:0007155	cell adhesion	Biological Process	1	Q16678
3	GO:0044767	single-organism developmental process	Biological Process	4	Q9BYH2, B4DUP5, A0A1B0GVI7, Q16678
3	GO:0051674	localization of cell	Biological Process	1	Q9BYH2
3	GO:0051239	regulation of multicellular organismal process	Biological Process	2	A0A1B0GVI7, Q16678
3	GO:0044237	cellular metabolic process	Biological Process	10	Q9UDW1, B4DXI2, K7ER90, B4DUP5, A0A1B0GVI7, Q16678, Q5JSB5, Q4G148, Q96AE4, Q53EY9
3	GO:0003008	system process	Biological Process	1	Q16678
3	GO:0051050	positive regulation of transport	Biological Process	1	Q5JSB5
4	GO:0006790	sulfur compound metabolic process	Biological Process	1	Q4G148
4	GO:0015980	energy derivation by oxidation of organic compounds	Biological Process	1	Q9UDW1
4	GO:0031323	regulation of cellular metabolic process	Biological Process	7	K7ER90, B4DXI2, B4DUP5, A0A1B0GVI7, Q16678, Q5JSB5, Q96AE4
4	GO:0048513	animal organ development	Biological Process	3	B4DUP5, A0A1B0GVI7, Q16678
4	GO:1901576	organic substance biosynthetic process	Biological Process	7	K7ER90, B4DXI2, B4DUP5, A0A1B0GVI7, Q5JSB5, Q96AE4, Q4G148
4	GO:1905477	positive regulation of protein localization to membrane	Biological Process	1	Q5JSB5
4	GO:0051172	negative regulation of nitrogen compound metabolic process	Biological Process	2	B4DXI2, A0A1B0GVI7
4	GO:0010942	positive regulation of cell death	Biological Process	1	Q5JSB5
4	GO:0010817	regulation of hormone levels	Biological Process	1	Q16678
4	GO:0048608	reproductive structure development	Biological Process	1	B4DUP5
4	GO:0019748	secondary metabolic process	Biological Process	1	Q16678
4	GO:0001775	cell activation	Biological Process	1	A0A1B0GVI7
4	GO:0055086	nucleobase-containing small molecule metabolic process	Biological Process	1	Q9UDW1
4	GO:0051238	sequestering of metal ion	Biological Process	1	G3V1D1
4	GO:0051325	interphase	Biological Process	1	Q5JSB5
4	GO:0001568	blood vessel development	Biological Process	2	A0A1B0GVI7, Q16678
4	GO:0022900	electron transport chain	Biological Process	1	Q9UDW1
4	GO:0006629	lipid metabolic process	Biological Process	1	Q16678
4	GO:0032880	regulation of protein localization	Biological Process	1	Q5JSB5
4	GO:1901657	glycosyl compound metabolic process	Biological Process	1	Q9UDW1
4	GO:0061024	membrane organization	Biological Process	2	Q5JSB5, Q05BX6
4	GO:0044248	cellular catabolic process	Biological Process	2	Q16678, Q53EY9
4	GO:0034754	cellular hormone metabolic process	Biological Process	1	Q16678
4	GO:0055114	oxidation-reduction process	Biological Process	2	Q9UDW1, Q16678
4	GO:0098763	mitotic cell cycle phase	Biological Process	1	Q5JSB5
4	GO:0007049	cell cycle	Biological Process	2	B4DXI2, Q5JSB5
4	GO:0010604	positive regulation of macromolecule metabolic process	Biological Process	3	A0A1B0GVI7, Q5JSB5, Q96AE4
4	GO:0009888	tissue development	Biological Process	1	Q16678
4	GO:0043933	macromolecular complex subunit organization	Biological Process	1	B4DXI2
4	GO:0090559	regulation of membrane permeability	Biological Process	1	Q5JSB5
4	GO:1902580	single-organism cellular localization	Biological Process	1	Q5JSB5
4	GO:0007165	signal transduction	Biological Process	4	A0A1B0GVI7, Q5JSB5, B4DWS8, Q05BX6
4	GO:0046649	lymphocyte activation	Biological Process	1	A0A1B0GVI7
4	GO:0044802	single-organism membrane organization	Biological Process	1	Q5JSB5
4	GO:0006486	protein glycosylation	Biological Process	1	Q4G148
4	GO:0044249	cellular biosynthetic process	Biological Process	8	K7ER90, B4DXI2, B4DUP5, A0A1B0GVI7, Q16678, Q5JSB5, Q96AE4, Q4G148
4	GO:0019637	organophosphate metabolic process	Biological Process	1	Q9UDW1
4	GO:0051726	regulation of cell cycle	Biological Process	2	B4DXI2, Q5JSB5
4	GO:0009891	positive regulation of biosynthetic process	Biological Process	2	A0A1B0GVI7, Q5JSB5
4	GO:0009967	positive regulation of signal transduction	Biological Process	1	Q5JSB5
4	GO:0007050	cell cycle arrest	Biological Process	1	Q5JSB5
4	GO:0048144	fibroblast proliferation	Biological Process	1	G3V1D1
4	GO:0007548	sex differentiation	Biological Process	1	B4DUP5
4	GO:0043170	macromolecule metabolic process	Biological Process	9	B4DXI2, K7ER90, A0A1B0GVI7, B4DUP5, Q16678, Q5JSB5, Q96AE4, Q4G148, Q53EY9
4	GO:1901030	positive regulation of mitochondrial outer membrane permeabilization involved in apoptotic signaling pathway	Biological Process	1	Q5JSB5
4	GO:0042127	regulation of cell proliferation	Biological Process	2	A0A1B0GVI7, G3V1D1
4	GO:0045137	development of primary sexual characteristics	Biological Process	1	B4DUP5
4	GO:0050877	neurological system process	Biological Process	1	Q16678
4	GO:0008219	cell death	Biological Process	2	A0A1B0GVI7, Q5JSB5
4	GO:0016477	cell migration	Biological Process	1	Q9BYH2
4	GO:0006928	movement of cell or subcellular component	Biological Process	1	Q9BYH2
4	GO:0051318	G1 phase	Biological Process	1	Q5JSB5
4	GO:1901360	organic cyclic compound metabolic process	Biological Process	6	Q9UDW1, B4DXI2, A0A1B0GVI7, Q16678, Q5JSB5, Q96AE4
4	GO:0019538	protein metabolic process	Biological Process	5	K7ER90, B4DXI2, B4DUP5, Q4G148, Q53EY9
4	GO:1901135	carbohydrate derivative metabolic process	Biological Process	2	Q9UDW1, Q4G148
4	GO:0051649	establishment of localization in cell	Biological Process	1	Q5JSB5
4	GO:0016032	viral process	Biological Process	1	K7ER90
4	GO:0010646	regulation of cell communication	Biological Process	1	Q5JSB5
4	GO:0010035	response to inorganic substance	Biological Process	1	Q16678
4	GO:0008406	gonad development	Biological Process	1	B4DUP5
4	GO:0044770	cell cycle phase transition	Biological Process	2	B4DXI2, Q5JSB5
4	GO:0045184	establishment of protein localization	Biological Process	1	Q5JSB5
4	GO:0009966	regulation of signal transduction	Biological Process	1	Q5JSB5
4	GO:0051341	regulation of oxidoreductase activity	Biological Process	1	G3V1D1
4	GO:0008285	negative regulation of cell proliferation	Biological Process	1	G3V1D1
4	GO:0006081	cellular aldehyde metabolic process	Biological Process	1	Q16678
4	GO:0060255	regulation of macromolecule metabolic process	Biological Process	7	K7ER90, B4DXI2, B4DUP5, A0A1B0GVI7, Q16678, Q5JSB5, Q96AE4
4	GO:0007154	cell communication	Biological Process	4	A0A1B0GVI7, Q5JSB5, B4DWS8, Q05BX6
4	GO:1901615	organic hydroxy compound metabolic process	Biological Process	1	Q16678
4	GO:0060041	retina development in camera-type eye	Biological Process	1	Q16678
4	GO:0007423	sensory organ development	Biological Process	1	Q16678
4	GO:0009890	negative regulation of biosynthetic process	Biological Process	2	B4DXI2, A0A1B0GVI7
4	GO:0044765	single-organism transport	Biological Process	1	Q9BYH2
4	GO:0006805	xenobiotic metabolic process	Biological Process	2	A0A1B0GVI7, Q16678
4	GO:0010564	regulation of cell cycle process	Biological Process	2	B4DXI2, Q5JSB5
4	GO:0010948	negative regulation of cell cycle process	Biological Process	2	B4DXI2, Q5JSB5
4	GO:0006413	translational initiation	Biological Process	2	K7ER90, B4DUP5
4	GO:0051130	positive regulation of cellular component organization	Biological Process	1	Q5JSB5
4	GO:0050790	regulation of catalytic activity	Biological Process	3	B4DUP5, B4DWS8, G3V1D1
4	GO:0009266	response to temperature stimulus	Biological Process	1	B4DUP5
4	GO:0006139	nucleobase-containing compound metabolic process	Biological Process	5	Q9UDW1, B4DXI2, A0A1B0GVI7, Q5JSB5, Q96AE4
4	GO:0010941	regulation of cell death	Biological Process	1	Q5JSB5
4	GO:0044260	cellular macromolecule metabolic process	Biological Process	8	B4DXI2, K7ER90, A0A1B0GVI7, B4DUP5, Q5JSB5, Q96AE4, Q4G148, Q53EY9
4	GO:0044712	single-organism catabolic process	Biological Process	1	Q16678
4	GO:0051204	protein insertion into mitochondrial membrane	Biological Process	1	Q5JSB5
4	GO:0046483	heterocycle metabolic process	Biological Process	5	Q9UDW1, B4DXI2, A0A1B0GVI7, Q5JSB5, Q96AE4
4	GO:0008284	positive regulation of cell proliferation	Biological Process	1	G3V1D1
4	GO:0031325	positive regulation of cellular metabolic process	Biological Process	2	A0A1B0GVI7, Q5JSB5
4	GO:1903749	positive regulation of establishment of protein localization to mitochondrion	Biological Process	1	Q5JSB5
4	GO:1901575	organic substance catabolic process	Biological Process	2	Q16678, Q53EY9
4	GO:0090068	positive regulation of cell cycle process	Biological Process	1	Q5JSB5
4	GO:0051651	maintenance of location in cell	Biological Process	1	G3V1D1
4	GO:1903047	mitotic cell cycle process	Biological Process	2	B4DXI2, Q5JSB5
4	GO:1901564	organonitrogen compound metabolic process	Biological Process	4	Q9UDW1, K7ER90, B4DUP5, Q4G148
4	GO:0060341	regulation of cellular localization	Biological Process	1	Q5JSB5
4	GO:0048731	system development	Biological Process	3	B4DUP5, A0A1B0GVI7, Q16678
4	GO:0007272	ensheathment of neurons	Biological Process	1	B4DUP5
4	GO:1901700	response to oxygen-containing compound	Biological Process	2	A0A1B0GVI7, Q16678
4	GO:0051173	positive regulation of nitrogen compound metabolic process	Biological Process	2	A0A1B0GVI7, Q5JSB5
4	GO:0042592	homeostatic process	Biological Process	1	G3V1D1
4	GO:0051128	regulation of cellular component organization	Biological Process	1	Q5JSB5
4	GO:0006091	generation of precursor metabolites and energy	Biological Process	1	Q9UDW1
4	GO:0006082	organic acid metabolic process	Biological Process	1	Q16678
4	GO:0072422	signal transduction involved in DNA damage checkpoint	Biological Process	1	Q5JSB5
4	GO:0009636	response to toxic substance	Biological Process	2	Q9BYH2, A0A1B0GVI7
4	GO:0044093	positive regulation of molecular function	Biological Process	1	G3V1D1
4	GO:0033554	cellular response to stress	Biological Process	2	Q16678, Q5JSB5
4	GO:0045786	negative regulation of cell cycle	Biological Process	2	B4DXI2, Q5JSB5
4	GO:0072593	reactive oxygen species metabolic process	Biological Process	1	Q16678
4	GO:0051353	positive regulation of oxidoreductase activity	Biological Process	1	G3V1D1
4	GO:0045787	positive regulation of cell cycle	Biological Process	1	Q5JSB5
4	GO:0044255	cellular lipid metabolic process	Biological Process	1	Q16678
4	GO:0070661	leukocyte proliferation	Biological Process	1	A0A1B0GVI7
4	GO:0048468	cell development	Biological Process	1	B4DUP5
4	GO:0070727	cellular macromolecule localization	Biological Process	1	Q5JSB5
4	GO:0009889	regulation of biosynthetic process	Biological Process	6	K7ER90, B4DXI2, A0A1B0GVI7, B4DUP5, Q5JSB5, Q96AE4
4	GO:0070085	glycosylation	Biological Process	1	Q4G148
4	GO:0010033	response to organic substance	Biological Process	2	A0A1B0GVI7, Q16678
4	GO:0044403	symbiosis, encompassing mutualism through parasitism	Biological Process	1	K7ER90
4	GO:0070887	cellular response to chemical stimulus	Biological Process	2	A0A1B0GVI7, Q16678
4	GO:0051049	regulation of transport	Biological Process	1	Q5JSB5
4	GO:0019725	cellular homeostasis	Biological Process	1	G3V1D1
4	GO:1902589	single-organism organelle organization	Biological Process	1	Q5JSB5
4	GO:0080090	regulation of primary metabolic process	Biological Process	6	K7ER90, B4DXI2, A0A1B0GVI7, B4DUP5, Q5JSB5, Q96AE4
4	GO:0006793	phosphorus metabolic process	Biological Process	1	Q9UDW1
4	GO:0044281	small molecule metabolic process	Biological Process	2	Q9UDW1, Q16678
4	GO:0008104	protein localization	Biological Process	1	Q5JSB5
4	GO:0007275	multicellular organism development	Biological Process	4	Q9BYH2, B4DUP5, A0A1B0GVI7, Q16678
4	GO:0009408	response to heat	Biological Process	1	B4DUP5
4	GO:0010647	positive regulation of cell communication	Biological Process	1	Q5JSB5
4	GO:0031324	negative regulation of cellular metabolic process	Biological Process	2	B4DXI2, A0A1B0GVI7
4	GO:0006810	transport	Biological Process	5	Q9BYH2, Q5JSB5, B7ZL14, G3V1D1, Q05BX6
4	GO:0006979	response to oxidative stress	Biological Process	1	Q16678
4	GO:0002694	regulation of leukocyte activation	Biological Process	1	A0A1B0GVI7
4	GO:0048869	cellular developmental process	Biological Process	1	B4DUP5
4	GO:0000075	cell cycle checkpoint	Biological Process	1	Q5JSB5
4	GO:0034641	cellular nitrogen compound metabolic process	Biological Process	8	Q9UDW1, B4DXI2, K7ER90, A0A1B0GVI7, B4DUP5, Q16678, Q5JSB5, Q96AE4
4	GO:0009410	response to xenobiotic stimulus	Biological Process	2	A0A1B0GVI7, Q16678
4	GO:0048514	blood vessel morphogenesis	Biological Process	1	Q16678
4	GO:0001541	ovarian follicle development	Biological Process	1	B4DUP5
4	GO:0051171	regulation of nitrogen compound metabolic process	Biological Process	6	K7ER90, B4DXI2, A0A1B0GVI7, B4DUP5, Q5JSB5, Q96AE4
4	GO:0010605	negative regulation of macromolecule metabolic process	Biological Process	2	B4DXI2, A0A1B0GVI7
4	GO:0050865	regulation of cell activation	Biological Process	1	A0A1B0GVI7
4	GO:0006996	organelle organization	Biological Process	2	Q5JSB5, B7ZL14
4	GO:0006725	cellular aromatic compound metabolic process	Biological Process	6	Q9UDW1, B4DXI2, A0A1B0GVI7, Q16678, Q5JSB5, Q96AE4
4	GO:0019080	viral gene expression	Biological Process	1	K7ER90
4	GO:1903409	reactive oxygen species biosynthetic process	Biological Process	1	Q16678
5	GO:0042574	retinal metabolic process	Biological Process	1	Q16678
5	GO:0072395	signal transduction involved in cell cycle checkpoint	Biological Process	1	Q5JSB5
5	GO:0072657	protein localization to membrane	Biological Process	1	Q5JSB5
5	GO:0048145	regulation of fibroblast proliferation	Biological Process	1	G3V1D1
5	GO:0046651	lymphocyte proliferation	Biological Process	1	A0A1B0GVI7
5	GO:0046545	development of primary female sexual characteristics	Biological Process	1	B4DUP5
5	GO:1901028	regulation of mitochondrial outer membrane permeabilization involved in apoptotic signaling pathway	Biological Process	1	Q5JSB5
5	GO:0072594	establishment of protein localization to organelle	Biological Process	1	Q5JSB5
5	GO:0055085	transmembrane transport	Biological Process	1	Q9BYH2
5	GO:0044843	cell cycle G1/S phase transition	Biological Process	1	Q5JSB5
5	GO:0051252	regulation of RNA metabolic process	Biological Process	4	B4DXI2, A0A1B0GVI7, Q5JSB5, Q96AE4
5	GO:0019438	aromatic compound biosynthetic process	Biological Process	4	B4DXI2, A0A1B0GVI7, Q5JSB5, Q96AE4
5	GO:1900740	positive regulation of protein insertion into mitochondrial membrane involved in apoptotic signaling pathway	Biological Process	1	Q5JSB5
5	GO:0061025	membrane fusion	Biological Process	1	Q05BX6
5	GO:0097190	apoptotic signaling pathway	Biological Process	1	Q5JSB5
5	GO:0007600	sensory perception	Biological Process	1	Q16678
5	GO:0019219	regulation of nucleobase-containing compound metabolic process	Biological Process	4	B4DXI2, A0A1B0GVI7, Q5JSB5, Q96AE4
5	GO:0036211	protein modification process	Biological Process	3	B4DXI2, Q4G148, Q53EY9
5	GO:0035556	intracellular signal transduction	Biological Process	2	Q5JSB5, B4DWS8
5	GO:0043603	cellular amide metabolic process	Biological Process	2	K7ER90, B4DUP5
5	GO:0007005	mitochondrion organization	Biological Process	1	Q5JSB5
5	GO:0016070	RNA metabolic process	Biological Process	4	B4DXI2, A0A1B0GVI7, Q5JSB5, Q96AE4
5	GO:0042113	B cell activation	Biological Process	1	A0A1B0GVI7
5	GO:0016042	lipid catabolic process	Biological Process	1	Q16678
5	GO:1903827	regulation of cellular protein localization	Biological Process	1	Q5JSB5
5	GO:0072348	sulfur compound transport	Biological Process	1	Q9BYH2
5	GO:0010558	negative regulation of macromolecule biosynthetic process	Biological Process	2	B4DXI2, A0A1B0GVI7
5	GO:2001233	regulation of apoptotic signaling pathway	Biological Process	1	Q5JSB5
5	GO:0006880	intracellular sequestering of iron ion	Biological Process	1	G3V1D1
5	GO:0010557	positive regulation of macromolecule biosynthetic process	Biological Process	2	A0A1B0GVI7, Q5JSB5
5	GO:0016192	vesicle-mediated transport	Biological Process	2	B7ZL14, Q05BX6
5	GO:0018130	heterocycle biosynthetic process	Biological Process	4	B4DXI2, A0A1B0GVI7, Q5JSB5, Q96AE4
5	GO:0061458	reproductive system development	Biological Process	1	B4DUP5
5	GO:0043068	positive regulation of programmed cell death	Biological Process	1	Q5JSB5
5	GO:0006720	isoprenoid metabolic process	Biological Process	1	Q16678
5	GO:0010556	regulation of macromolecule biosynthetic process	Biological Process	6	K7ER90, B4DXI2, A0A1B0GVI7, B4DUP5, Q5JSB5, Q96AE4
5	GO:0014070	response to organic cyclic compound	Biological Process	2	A0A1B0GVI7, Q16678
5	GO:0051249	regulation of lymphocyte activation	Biological Process	1	A0A1B0GVI7
5	GO:0070201	regulation of establishment of protein localization	Biological Process	1	Q5JSB5
5	GO:0044265	cellular macromolecule catabolic process	Biological Process	1	Q53EY9
5	GO:1901987	regulation of cell cycle phase transition	Biological Process	2	B4DXI2, Q5JSB5
5	GO:0072359	circulatory system development	Biological Process	2	A0A1B0GVI7, Q16678
5	GO:0034645	cellular macromolecule biosynthetic process	Biological Process	7	K7ER90, B4DXI2, B4DUP5, A0A1B0GVI7, Q5JSB5, Q96AE4, Q4G148
5	GO:0071156	regulation of cell cycle arrest	Biological Process	1	Q5JSB5
5	GO:0010468	regulation of gene expression	Biological Process	7	B4DXI2, K7ER90, B4DUP5, A0A1B0GVI7, Q16678, Q5JSB5, Q96AE4
5	GO:0051339	regulation of lyase activity	Biological Process	1	G3V1D1
5	GO:0006811	ion transport	Biological Process	2	Q9BYH2, G3V1D1
5	GO:0001944	vasculature development	Biological Process	2	A0A1B0GVI7, Q16678
5	GO:0034248	regulation of cellular amide metabolic process	Biological Process	2	K7ER90, B4DUP5
5	GO:0010638	positive regulation of organelle organization	Biological Process	1	Q5JSB5
5	GO:0015849	organic acid transport	Biological Process	1	Q9BYH2
5	GO:0050654	chondroitin sulfate proteoglycan metabolic process	Biological Process	1	Q4G148
5	GO:0001654	eye development	Biological Process	1	Q16678
5	GO:0006493	protein O-linked glycosylation	Biological Process	1	Q4G148
5	GO:0010467	gene expression	Biological Process	7	K7ER90, B4DXI2, B4DUP5, A0A1B0GVI7, Q16678, Q5JSB5, Q96AE4
5	GO:0071705	nitrogen compound transport	Biological Process	1	Q9BYH2
5	GO:0008585	female gonad development	Biological Process	1	B4DUP5
5	GO:0022904	respiratory electron transport chain	Biological Process	1	Q9UDW1
5	GO:0006839	mitochondrial transport	Biological Process	1	Q5JSB5
5	GO:0048878	chemical homeostasis	Biological Process	1	G3V1D1
5	GO:0032268	regulation of cellular protein metabolic process	Biological Process	3	K7ER90, B4DXI2, B4DUP5
5	GO:0031327	negative regulation of cellular biosynthetic process	Biological Process	2	B4DXI2, A0A1B0GVI7
5	GO:0044271	cellular nitrogen compound biosynthetic process	Biological Process	6	K7ER90, B4DXI2, A0A1B0GVI7, B4DUP5, Q5JSB5, Q96AE4
5	GO:0031328	positive regulation of cellular biosynthetic process	Biological Process	2	A0A1B0GVI7, Q5JSB5
5	GO:1901566	organonitrogen compound biosynthetic process	Biological Process	3	K7ER90, B4DUP5, Q4G148
5	GO:0070663	regulation of leukocyte proliferation	Biological Process	1	A0A1B0GVI7
5	GO:0034613	cellular protein localization	Biological Process	1	Q5JSB5
5	GO:0043436	oxoacid metabolic process	Biological Process	1	Q16678
5	GO:0009100	glycoprotein metabolic process	Biological Process	1	Q4G148
5	GO:0006022	aminoglycan metabolic process	Biological Process	1	Q4G148
5	GO:0048147	negative regulation of fibroblast proliferation	Biological Process	1	G3V1D1
5	GO:0006325	chromatin organization	Biological Process	1	B4DXI2
5	GO:0012501	programmed cell death	Biological Process	2	A0A1B0GVI7, Q5JSB5
5	GO:0043067	regulation of programmed cell death	Biological Process	1	Q5JSB5
5	GO:1904231	positive regulation of succinate dehydrogenase activity	Biological Process	1	G3V1D1
5	GO:0045934	negative regulation of nucleobase-containing compound metabolic process	Biological Process	2	B4DXI2, A0A1B0GVI7
5	GO:0032943	mononuclear cell proliferation	Biological Process	1	A0A1B0GVI7
5	GO:0009057	macromolecule catabolic process	Biological Process	1	Q53EY9
5	GO:0090304	nucleic acid metabolic process	Biological Process	4	B4DXI2, A0A1B0GVI7, Q5JSB5, Q96AE4
5	GO:1901988	negative regulation of cell cycle phase transition	Biological Process	1	Q5JSB5
5	GO:0021782	glial cell development	Biological Process	1	B4DUP5
5	GO:1904229	regulation of succinate dehydrogenase activity	Biological Process	1	G3V1D1
5	GO:0034654	nucleobase-containing compound biosynthetic process	Biological Process	4	B4DXI2, A0A1B0GVI7, Q5JSB5, Q96AE4
5	GO:0072521	purine-containing compound metabolic process	Biological Process	1	Q9UDW1
5	GO:0009116	nucleoside metabolic process	Biological Process	1	Q9UDW1
5	GO:0001844	protein insertion into mitochondrial membrane involved in apoptotic signaling pathway	Biological Process	1	Q5JSB5
5	GO:0044772	mitotic cell cycle phase transition	Biological Process	2	B4DXI2, Q5JSB5
5	GO:0019693	ribose phosphate metabolic process	Biological Process	1	Q9UDW1
5	GO:1905475	regulation of protein localization to membrane	Biological Process	1	Q5JSB5
5	GO:0034599	cellular response to oxidative stress	Biological Process	1	Q16678
5	GO:0019081	viral translation	Biological Process	1	K7ER90
5	GO:1901137	carbohydrate derivative biosynthetic process	Biological Process	1	Q4G148
5	GO:0051205	protein insertion into membrane	Biological Process	1	Q5JSB5
5	GO:1901362	organic cyclic compound biosynthetic process	Biological Process	4	B4DXI2, A0A1B0GVI7, Q5JSB5, Q96AE4
5	GO:0030163	protein catabolic process	Biological Process	1	Q53EY9
5	GO:0006518	peptide metabolic process	Biological Process	2	K7ER90, B4DUP5
5	GO:0007417	central nervous system development	Biological Process	1	B4DUP5
5	GO:0031570	DNA integrity checkpoint	Biological Process	1	Q5JSB5
5	GO:0019058	viral life cycle	Biological Process	1	K7ER90
5	GO:0071310	cellular response to organic substance	Biological Process	2	A0A1B0GVI7, Q16678
5	GO:0046660	female sex differentiation	Biological Process	1	B4DUP5
5	GO:0030154	cell differentiation	Biological Process	1	B4DUP5
5	GO:0008366	axon ensheathment	Biological Process	1	B4DUP5
5	GO:0033043	regulation of organelle organization	Biological Process	1	Q5JSB5
5	GO:0008202	steroid metabolic process	Biological Process	1	Q16678
5	GO:1902400	intracellular signal transduction involved in G1 DNA damage checkpoint	Biological Process	1	Q5JSB5
5	GO:0016125	sterol metabolic process	Biological Process	1	Q16678
5	GO:0007093	mitotic cell cycle checkpoint	Biological Process	1	Q5JSB5
5	GO:0010629	negative regulation of gene expression	Biological Process	1	B4DXI2
5	GO:0061298	retina vasculature development in camera-type eye	Biological Process	1	Q16678
5	GO:0042572	retinol metabolic process	Biological Process	1	Q16678
5	GO:0051254	positive regulation of RNA metabolic process	Biological Process	2	A0A1B0GVI7, Q5JSB5
5	GO:0043085	positive regulation of catalytic activity	Biological Process	1	G3V1D1
5	GO:0006631	fatty acid metabolic process	Biological Process	1	Q16678
5	GO:0044267	cellular protein metabolic process	Biological Process	5	K7ER90, B4DXI2, B4DUP5, Q4G148, Q53EY9
5	GO:0007399	nervous system development	Biological Process	1	B4DUP5
5	GO:0051336	regulation of hydrolase activity	Biological Process	2	B4DUP5, B4DWS8
5	GO:0055082	cellular chemical homeostasis	Biological Process	1	G3V1D1
5	GO:0097577	sequestering of iron ion	Biological Process	1	G3V1D1
5	GO:0006066	alcohol metabolic process	Biological Process	1	Q16678
5	GO:0043412	macromolecule modification	Biological Process	3	B4DXI2, Q4G148, Q53EY9
5	GO:0006796	phosphate-containing compound metabolic process	Biological Process	1	Q9UDW1
5	GO:0071158	positive regulation of cell cycle arrest	Biological Process	1	Q5JSB5
5	GO:0006753	nucleoside phosphate metabolic process	Biological Process	1	Q9UDW1
5	GO:1902402	signal transduction involved in mitotic DNA damage checkpoint	Biological Process	1	Q5JSB5
5	GO:0006974	cellular response to DNA damage stimulus	Biological Process	1	Q5JSB5
5	GO:0010628	positive regulation of gene expression	Biological Process	3	A0A1B0GVI7, Q5JSB5, Q96AE4
5	GO:0044272	sulfur compound biosynthetic process	Biological Process	1	Q4G148
5	GO:0051329	mitotic interphase	Biological Process	1	Q5JSB5
5	GO:0007346	regulation of mitotic cell cycle	Biological Process	2	B4DXI2, Q5JSB5
5	GO:0071466	cellular response to xenobiotic stimulus	Biological Process	2	A0A1B0GVI7, Q16678
5	GO:0000278	mitotic cell cycle	Biological Process	2	B4DXI2, Q5JSB5
5	GO:0072358	cardiovascular system development	Biological Process	2	A0A1B0GVI7, Q16678
5	GO:0006119	oxidative phosphorylation	Biological Process	1	Q9UDW1
5	GO:0000080	mitotic G1 phase	Biological Process	1	Q5JSB5
5	GO:0071702	organic substance transport	Biological Process	1	Q9BYH2
5	GO:0007006	mitochondrial membrane organization	Biological Process	1	Q5JSB5
5	GO:0033993	response to lipid	Biological Process	1	A0A1B0GVI7
5	GO:0006508	proteolysis	Biological Process	1	Q53EY9
5	GO:0051246	regulation of protein metabolic process	Biological Process	3	K7ER90, B4DXI2, B4DUP5
5	GO:0009059	macromolecule biosynthetic process	Biological Process	7	K7ER90, B4DXI2, B4DUP5, A0A1B0GVI7, Q5JSB5, Q96AE4, Q4G148
5	GO:0015846	polyamine transport	Biological Process	1	Q9BYH2
5	GO:0043413	macromolecule glycosylation	Biological Process	1	Q4G148
5	GO:0090150	establishment of protein localization to membrane	Biological Process	1	Q5JSB5
5	GO:0045930	negative regulation of mitotic cell cycle	Biological Process	1	Q5JSB5
5	GO:0075525	viral translational termination-reinitiation	Biological Process	1	K7ER90
5	GO:0006446	regulation of translational initiation	Biological Process	2	K7ER90, B4DUP5
5	GO:0051253	negative regulation of RNA metabolic process	Biological Process	2	B4DXI2, A0A1B0GVI7
5	GO:0045333	cellular respiration	Biological Process	1	Q9UDW1
5	GO:0045935	positive regulation of nucleobase-containing compound metabolic process	Biological Process	2	A0A1B0GVI7, Q5JSB5
5	GO:0008210	estrogen metabolic process	Biological Process	1	Q16678
5	GO:0046902	regulation of mitochondrial membrane permeability	Biological Process	1	Q5JSB5
5	GO:2001235	positive regulation of apoptotic signaling pathway	Biological Process	1	Q5JSB5
5	GO:0031326	regulation of cellular biosynthetic process	Biological Process	6	K7ER90, B4DXI2, A0A1B0GVI7, B4DUP5, Q5JSB5, Q96AE4
5	GO:0030204	chondroitin sulfate metabolic process	Biological Process	1	Q4G148
6	GO:0022008	neurogenesis	Biological Process	1	B4DUP5
6	GO:0072331	signal transduction by p53 class mediator	Biological Process	1	Q5JSB5
6	GO:0009141	nucleoside triphosphate metabolic process	Biological Process	1	Q9UDW1
6	GO:0035794	positive regulation of mitochondrial membrane permeability	Biological Process	1	Q5JSB5
6	GO:0030203	glycosaminoglycan metabolic process	Biological Process	1	Q4G148
6	GO:0006464	cellular protein modification process	Biological Process	3	B4DXI2, Q4G148, Q53EY9
6	GO:0050864	regulation of B cell activation	Biological Process	1	A0A1B0GVI7
6	GO:0006029	proteoglycan metabolic process	Biological Process	1	Q4G148
6	GO:0050650	chondroitin sulfate proteoglycan biosynthetic process	Biological Process	1	Q4G148
6	GO:0019752	carboxylic acid metabolic process	Biological Process	1	Q16678
6	GO:0008637	apoptotic mitochondrial changes	Biological Process	1	Q5JSB5
6	GO:0051349	positive regulation of lyase activity	Biological Process	1	G3V1D1
6	GO:1901991	negative regulation of mitotic cell cycle phase transition	Biological Process	1	Q5JSB5
6	GO:1901990	regulation of mitotic cell cycle phase transition	Biological Process	2	B4DXI2, Q5JSB5
6	GO:0016310	phosphorylation	Biological Process	1	Q9UDW1
6	GO:0030206	chondroitin sulfate biosynthetic process	Biological Process	1	Q4G148
6	GO:0006023	aminoglycan biosynthetic process	Biological Process	1	Q4G148
6	GO:0072431	signal transduction involved in mitotic G1 DNA damage checkpoint	Biological Process	1	Q5JSB5
6	GO:2001141	regulation of RNA biosynthetic process	Biological Process	4	B4DXI2, A0A1B0GVI7, Q5JSB5, Q96AE4
6	GO:0006412	translation	Biological Process	2	K7ER90, B4DUP5
6	GO:1902806	regulation of cell cycle G1/S phase transition	Biological Process	1	Q5JSB5
6	GO:0043632	modification-dependent macromolecule catabolic process	Biological Process	1	Q53EY9
6	GO:0071407	cellular response to organic cyclic compound	Biological Process	1	Q16678
6	GO:0010001	glial cell differentiation	Biological Process	1	B4DUP5
6	GO:0006351	transcription, DNA-templated	Biological Process	4	B4DXI2, A0A1B0GVI7, Q5JSB5, Q96AE4
6	GO:0097345	mitochondrial outer membrane permeabilization	Biological Process	1	Q5JSB5
6	GO:1902679	negative regulation of RNA biosynthetic process	Biological Process	2	B4DXI2, A0A1B0GVI7
6	GO:0043043	peptide biosynthetic process	Biological Process	2	K7ER90, B4DUP5
6	GO:0032774	RNA biosynthetic process	Biological Process	4	B4DXI2, A0A1B0GVI7, Q5JSB5, Q96AE4
6	GO:0006163	purine nucleotide metabolic process	Biological Process	1	Q9UDW1
6	GO:0033559	unsaturated fatty acid metabolic process	Biological Process	1	Q16678
6	GO:0006812	cation transport	Biological Process	1	G3V1D1
6	GO:1904232	regulation of aconitate hydratase activity	Biological Process	1	G3V1D1
6	GO:0044257	cellular protein catabolic process	Biological Process	1	Q53EY9
6	GO:0014003	oligodendrocyte development	Biological Process	1	B4DUP5
6	GO:0072401	signal transduction involved in DNA integrity checkpoint	Biological Process	1	Q5JSB5
6	GO:0044819	mitotic G1/S transition checkpoint	Biological Process	1	Q5JSB5
6	GO:0006355	regulation of transcription, DNA-templated	Biological Process	4	B4DXI2, A0A1B0GVI7, Q5JSB5, Q96AE4
6	GO:0031399	regulation of protein modification process	Biological Process	1	B4DXI2
6	GO:0043065	positive regulation of apoptotic process	Biological Process	1	Q5JSB5
6	GO:0042770	signal transduction in response to DNA damage	Biological Process	1	Q5JSB5
6	GO:0043087	regulation of GTPase activity	Biological Process	2	B4DUP5, B4DWS8
6	GO:0009119	ribonucleoside metabolic process	Biological Process	1	Q9UDW1
6	GO:2000112	regulation of cellular macromolecule biosynthetic process	Biological Process	6	B4DXI2, K7ER90, B4DUP5, A0A1B0GVI7, Q5JSB5, Q96AE4
6	GO:0050670	regulation of lymphocyte proliferation	Biological Process	1	A0A1B0GVI7
6	GO:0006915	apoptotic process	Biological Process	2	A0A1B0GVI7, Q5JSB5
6	GO:0072655	establishment of protein localization to mitochondrion	Biological Process	1	Q5JSB5
6	GO:0033365	protein localization to organelle	Biological Process	1	Q5JSB5
6	GO:0006820	anion transport	Biological Process	1	Q9BYH2
6	GO:0044773	mitotic DNA damage checkpoint	Biological Process	1	Q5JSB5
6	GO:0006122	mitochondrial electron transport, ubiquinol to cytochrome c	Biological Process	1	Q9UDW1
6	GO:0006977	DNA damage response, signal transduction by p53 class mediator resulting in cell cycle arrest	Biological Process	1	Q5JSB5
6	GO:0050801	ion homeostasis	Biological Process	1	G3V1D1
6	GO:0032944	regulation of mononuclear cell proliferation	Biological Process	1	A0A1B0GVI7
6	GO:0043010	camera-type eye development	Biological Process	1	Q16678
6	GO:0006897	endocytosis	Biological Process	2	B7ZL14, Q05BX6
6	GO:0010822	positive regulation of mitochondrion organization	Biological Process	1	Q5JSB5
6	GO:0006865	amino acid transport	Biological Process	1	Q9BYH2
6	GO:0010821	regulation of mitochondrion organization	Biological Process	1	Q5JSB5
6	GO:0009101	glycoprotein biosynthetic process	Biological Process	1	Q4G148
6	GO:0042100	B cell proliferation	Biological Process	1	A0A1B0GVI7
6	GO:0000101	sulfur amino acid transport	Biological Process	1	Q9BYH2
6	GO:0042981	regulation of apoptotic process	Biological Process	1	Q5JSB5
6	GO:1900739	regulation of protein insertion into mitochondrial membrane involved in apoptotic signaling pathway	Biological Process	1	Q5JSB5
6	GO:0044774	mitotic DNA integrity checkpoint	Biological Process	1	Q5JSB5
6	GO:0051603	proteolysis involved in cellular protein catabolic process	Biological Process	1	Q53EY9
6	GO:0048709	oligodendrocyte differentiation	Biological Process	1	B4DUP5
6	GO:0042773	ATP synthesis coupled electron transport	Biological Process	1	Q9UDW1
6	GO:1902108	regulation of mitochondrial membrane permeability involved in apoptotic process	Biological Process	1	Q5JSB5
6	GO:0050953	sensory perception of light stimulus	Biological Process	1	Q16678
6	GO:2000113	negative regulation of cellular macromolecule biosynthetic process	Biological Process	1	B4DXI2
6	GO:0006721	terpenoid metabolic process	Biological Process	1	Q16678
6	GO:0042552	myelination	Biological Process	1	B4DUP5
6	GO:0016266	O-glycan processing	Biological Process	1	Q4G148
6	GO:0042278	purine nucleoside metabolic process	Biological Process	1	Q9UDW1
6	GO:0045892	negative regulation of transcription, DNA-templated	Biological Process	1	B4DXI2
6	GO:0015807	L-amino acid transport	Biological Process	1	Q9BYH2
6	GO:0009259	ribonucleotide metabolic process	Biological Process	1	Q9UDW1
6	GO:0006417	regulation of translation	Biological Process	2	K7ER90, B4DUP5
6	GO:1902807	negative regulation of cell cycle G1/S phase transition	Biological Process	1	Q5JSB5
6	GO:0010608	posttranscriptional regulation of gene expression	Biological Process	2	K7ER90, B4DUP5
6	GO:0009123	nucleoside monophosphate metabolic process	Biological Process	1	Q9UDW1
6	GO:0015711	organic anion transport	Biological Process	1	Q9BYH2
6	GO:0000077	DNA damage checkpoint	Biological Process	1	Q5JSB5
6	GO:0000082	G1/S transition of mitotic cell cycle	Biological Process	1	Q5JSB5
6	GO:1903825	organic acid transmembrane transport	Biological Process	1	Q9BYH2
6	GO:1902686	mitochondrial outer membrane permeabilization involved in programmed cell death	Biological Process	1	Q5JSB5
6	GO:0043604	amide biosynthetic process	Biological Process	2	K7ER90, B4DUP5
6	GO:0009117	nucleotide metabolic process	Biological Process	1	Q9UDW1
6	GO:0006873	cellular ion homeostasis	Biological Process	1	G3V1D1
6	GO:0001676	long-chain fatty acid metabolic process	Biological Process	1	Q16678
6	GO:0072413	signal transduction involved in mitotic cell cycle checkpoint	Biological Process	1	Q5JSB5
6	GO:0072337	modified amino acid transport	Biological Process	1	Q9BYH2
6	GO:0034308	primary alcohol metabolic process	Biological Process	1	Q16678
6	GO:1903747	regulation of establishment of protein localization to mitochondrion	Biological Process	1	Q5JSB5
6	GO:1902680	positive regulation of RNA biosynthetic process	Biological Process	2	A0A1B0GVI7, Q5JSB5
6	GO:0045893	positive regulation of transcription, DNA-templated	Biological Process	2	A0A1B0GVI7, Q5JSB5
7	GO:0019369	arachidonic acid metabolic process	Biological Process	1	Q16678
7	GO:1904234	positive regulation of aconitate hydratase activity	Biological Process	1	G3V1D1
7	GO:0007601	visual perception	Biological Process	1	Q16678
7	GO:0032787	monocarboxylic acid metabolic process	Biological Process	1	Q16678
7	GO:1902403	signal transduction involved in mitotic DNA integrity checkpoint	Biological Process	1	Q5JSB5
7	GO:0006366	transcription from RNA polymerase II promoter	Biological Process	4	B4DXI2, A0A1B0GVI7, Q5JSB5, Q96AE4
7	GO:0042775	mitochondrial ATP synthesis coupled electron transport	Biological Process	1	Q9UDW1
7	GO:0030888	regulation of B cell proliferation	Biological Process	1	A0A1B0GVI7
7	GO:0070647	protein modification by small protein conjugation or removal	Biological Process	1	Q53EY9
7	GO:1905039	carboxylic acid transmembrane transport	Biological Process	1	Q9BYH2
7	GO:0015811	L-cystine transport	Biological Process	1	Q9BYH2
7	GO:0042063	gliogenesis	Biological Process	1	B4DUP5
7	GO:2000134	negative regulation of G1/S transition of mitotic cell cycle	Biological Process	1	Q5JSB5
7	GO:0006690	icosanoid metabolic process	Biological Process	1	Q16678
7	GO:0003333	amino acid transmembrane transport	Biological Process	1	Q9BYH2
7	GO:0098771	inorganic ion homeostasis	Biological Process	1	G3V1D1
7	GO:0009126	purine nucleoside monophosphate metabolic process	Biological Process	1	Q9UDW1
7	GO:0006024	glycosaminoglycan biosynthetic process	Biological Process	1	Q4G148
7	GO:0031571	mitotic G1 DNA damage checkpoint	Biological Process	1	Q5JSB5
7	GO:0030166	proteoglycan biosynthetic process	Biological Process	1	Q4G148
7	GO:0030330	DNA damage response, signal transduction by p53 class mediator	Biological Process	1	Q5JSB5
7	GO:0009161	ribonucleoside monophosphate metabolic process	Biological Process	1	Q9UDW1
7	GO:0030001	metal ion transport	Biological Process	1	G3V1D1
7	GO:0009150	purine ribonucleotide metabolic process	Biological Process	1	Q9UDW1
7	GO:0045944	positive regulation of transcription from RNA polymerase II promoter	Biological Process	2	A0A1B0GVI7, Q5JSB5
7	GO:0015813	L-glutamate transport	Biological Process	1	Q9BYH2
7	GO:0046942	carboxylic acid transport	Biological Process	1	Q9BYH2
7	GO:0009144	purine nucleoside triphosphate metabolic process	Biological Process	1	Q9UDW1
7	GO:0019941	modification-dependent protein catabolic process	Biological Process	1	Q53EY9
7	GO:0015804	neutral amino acid transport	Biological Process	1	Q9BYH2
7	GO:0016101	diterpenoid metabolic process	Biological Process	1	Q16678
7	GO:0044783	G1 DNA damage checkpoint	Biological Process	1	Q5JSB5
7	GO:1903510	mucopolysaccharide metabolic process	Biological Process	1	Q4G148
7	GO:1902110	positive regulation of mitochondrial membrane permeability involved in apoptotic process	Biological Process	1	Q5JSB5
7	GO:1903506	regulation of nucleic acid-templated transcription	Biological Process	4	B4DXI2, A0A1B0GVI7, Q5JSB5, Q96AE4
7	GO:0030003	cellular cation homeostasis	Biological Process	1	G3V1D1
7	GO:0015800	acidic amino acid transport	Biological Process	1	Q9BYH2
7	GO:0070585	protein localization to mitochondrion	Biological Process	1	Q5JSB5
7	GO:0009199	ribonucleoside triphosphate metabolic process	Biological Process	1	Q9UDW1
7	GO:1903508	positive regulation of nucleic acid-templated transcription	Biological Process	2	A0A1B0GVI7, Q5JSB5
7	GO:2000045	regulation of G1/S transition of mitotic cell cycle	Biological Process	1	Q5JSB5
7	GO:0046128	purine ribonucleoside metabolic process	Biological Process	1	Q9UDW1
7	GO:1903507	negative regulation of nucleic acid-templated transcription	Biological Process	2	B4DXI2, A0A1B0GVI7
7	GO:0006357	regulation of transcription from RNA polymerase II promoter	Biological Process	3	B4DXI2, A0A1B0GVI7, Q5JSB5
7	GO:0055080	cation homeostasis	Biological Process	1	G3V1D1
7	GO:0097659	nucleic acid-templated transcription	Biological Process	4	B4DXI2, A0A1B0GVI7, Q5JSB5, Q96AE4
8	GO:0009167	purine ribonucleoside monophosphate metabolic process	Biological Process	1	Q9UDW1
8	GO:0019373	epoxygenase P450 pathway	Biological Process	1	Q16678
8	GO:0055065	metal ion homeostasis	Biological Process	1	G3V1D1
8	GO:0006875	cellular metal ion homeostasis	Biological Process	1	G3V1D1
8	GO:0001523	retinoid metabolic process	Biological Process	1	Q16678
8	GO:0000041	transition metal ion transport	Biological Process	1	G3V1D1
8	GO:0032446	protein modification by small protein conjugation	Biological Process	1	Q53EY9
8	GO:0097267	omega-hydroxylase P450 pathway	Biological Process	1	Q16678
8	GO:0006835	dicarboxylic acid transport	Biological Process	1	Q9BYH2
8	GO:0009205	purine ribonucleoside triphosphate metabolic process	Biological Process	1	Q9UDW1
8	GO:0006511	ubiquitin-dependent protein catabolic process	Biological Process	1	Q53EY9
8	GO:0046034	ATP metabolic process	Biological Process	1	Q9UDW1
9	GO:0046916	cellular transition metal ion homeostasis	Biological Process	1	G3V1D1
9	GO:0055076	transition metal ion homeostasis	Biological Process	1	G3V1D1
9	GO:0016567	protein ubiquitination	Biological Process	1	Q53EY9
9	GO:0006826	iron ion transport	Biological Process	1	G3V1D1
10	GO:0055072	iron ion homeostasis	Biological Process	1	G3V1D1
10	GO:0006879	cellular iron ion homeostasis	Biological Process	1	G3V1D1

## Sheet: MF
GO function annotation and analysis different expressed proteins of ACBP vs. control MF
Level	GO_ID	Term	Type	Seqs_Num	Sequences
1	GO:0003674	molecular_function	Molecular Function	14	Q16678, Q5JSB5, Q4G148, G3V1D1, M0R2S3, Q53EY9, Q9BYH2, B4DXI2, K7ER90, B4DUP5, A0A1B0GVI7, Q96AE4, B7ZL14, Q05BX6
2	GO:0000988	transcription factor activity, protein binding	Molecular Function	2	B4DXI2, Q5JSB5
2	GO:0005488	binding	Molecular Function	13	Q16678, Q5JSB5, G3V1D1, M0R2S3, Q53EY9, Q9BYH2, K7ER90, B4DXI2, A0A1B0GVI7, B4DUP5, Q96AE4, B7ZL14, Q05BX6
2	GO:0060089	molecular transducer activity	Molecular Function	1	A0A1B0GVI7
2	GO:0005215	transporter activity	Molecular Function	1	Q9BYH2
2	GO:0004871	signal transducer activity	Molecular Function	1	A0A1B0GVI7
2	GO:0003824	catalytic activity	Molecular Function	3	Q16678, Q4G148, Q53EY9
2	GO:0001071	nucleic acid binding transcription factor activity	Molecular Function	3	A0A1B0GVI7, Q5JSB5, Q96AE4
2	GO:0098772	molecular function regulator	Molecular Function	2	B4DUP5, Q05BX6
3	GO:0022857	transmembrane transporter activity	Molecular Function	1	Q9BYH2
3	GO:0043167	ion binding	Molecular Function	2	Q16678, G3V1D1
3	GO:0003700	transcription factor activity, sequence-specific DNA binding	Molecular Function	3	A0A1B0GVI7, Q5JSB5, Q96AE4
3	GO:0004879	RNA polymerase II transcription factor activity, ligand-activated sequence-specific DNA binding	Molecular Function	1	A0A1B0GVI7
3	GO:0019825	oxygen binding	Molecular Function	1	Q16678
3	GO:0005515	protein binding	Molecular Function	12	Q9BYH2, B4DXI2, K7ER90, A0A1B0GVI7, B4DUP5, Q5JSB5, Q96AE4, B7ZL14, G3V1D1, Q05BX6, M0R2S3, Q53EY9
3	GO:0030234	enzyme regulator activity	Molecular Function	1	Q05BX6
3	GO:0097159	organic cyclic compound binding	Molecular Function	6	K7ER90, B4DXI2, A0A1B0GVI7, B4DUP5, Q16678, Q96AE4
3	GO:0000989	transcription factor activity, transcription factor binding	Molecular Function	2	B4DXI2, Q5JSB5
3	GO:1901363	heterocyclic compound binding	Molecular Function	6	K7ER90, B4DXI2, A0A1B0GVI7, B4DUP5, Q16678, Q96AE4
3	GO:0016740	transferase activity	Molecular Function	2	Q4G148, Q53EY9
3	GO:0022892	substrate-specific transporter activity	Molecular Function	1	Q9BYH2
3	GO:0004872	receptor activity	Molecular Function	1	A0A1B0GVI7
3	GO:0016491	oxidoreductase activity	Molecular Function	1	Q16678
3	GO:0038023	signaling receptor activity	Molecular Function	1	A0A1B0GVI7
3	GO:0036094	small molecule binding	Molecular Function	1	K7ER90
3	GO:0005085	guanyl-nucleotide exchange factor activity	Molecular Function	1	B4DUP5
4	GO:0016705	oxidoreductase activity, acting on paired donors, with incorporation or reduction of molecular oxygen	Molecular Function	1	Q16678
4	GO:1901265	nucleoside phosphate binding	Molecular Function	1	K7ER90
4	GO:0072349	modified amino acid transmembrane transporter activity	Molecular Function	1	Q9BYH2
4	GO:0046983	protein dimerization activity	Molecular Function	2	A0A1B0GVI7, Q05BX6
4	GO:0008047	enzyme activator activity	Molecular Function	1	Q05BX6
4	GO:0003676	nucleic acid binding	Molecular Function	5	B4DXI2, K7ER90, A0A1B0GVI7, B4DUP5, Q96AE4
4	GO:1901682	sulfur compound transmembrane transporter activity	Molecular Function	1	Q9BYH2
4	GO:0031072	heat shock protein binding	Molecular Function	1	A0A1B0GVI7
4	GO:0008134	transcription factor binding	Molecular Function	2	A0A1B0GVI7, Q5JSB5
4	GO:0060589	nucleoside-triphosphatase regulator activity	Molecular Function	1	Q05BX6
4	GO:0003712	transcription cofactor activity	Molecular Function	2	B4DXI2, Q5JSB5
4	GO:0000166	nucleotide binding	Molecular Function	1	K7ER90
4	GO:0022891	substrate-specific transmembrane transporter activity	Molecular Function	1	Q9BYH2
4	GO:0019787	ubiquitin-like protein transferase activity	Molecular Function	1	Q53EY9
4	GO:0043169	cation binding	Molecular Function	2	Q16678, G3V1D1
4	GO:0016757	transferase activity, transferring glycosyl groups	Molecular Function	1	Q4G148
4	GO:0005102	receptor binding	Molecular Function	1	Q05BX6
4	GO:0098531	transcription factor activity, direct ligand regulated sequence-specific DNA binding	Molecular Function	1	A0A1B0GVI7
4	GO:0000981	RNA polymerase II transcription factor activity, sequence-specific DNA binding	Molecular Function	1	A0A1B0GVI7
4	GO:0022804	active transmembrane transporter activity	Molecular Function	1	Q9BYH2
4	GO:0042802	identical protein binding	Molecular Function	2	B7ZL14, Q05BX6
4	GO:0019904	protein domain specific binding	Molecular Function	1	Q5JSB5
4	GO:0004874	aryl hydrocarbon receptor activity	Molecular Function	1	A0A1B0GVI7
4	GO:0004497	monooxygenase activity	Molecular Function	1	Q16678
4	GO:0042393	histone binding	Molecular Function	1	B4DXI2
4	GO:0046906	tetrapyrrole binding	Molecular Function	1	Q16678
5	GO:0042803	protein homodimerization activity	Molecular Function	1	Q05BX6
5	GO:0000099	sulfur amino acid transmembrane transporter activity	Molecular Function	1	Q9BYH2
5	GO:0070577	lysine-acetylated histone binding	Molecular Function	1	B4DXI2
5	GO:0008083	growth factor activity	Molecular Function	1	Q05BX6
5	GO:0016712	oxidoreductase activity, acting on paired donors, with incorporation or reduction of molecular oxygen, reduced flavin or flavoprotein as one donor, and incorporation of one atom of oxygen	Molecular Function	1	Q16678
5	GO:0005096	GTPase activator activity	Molecular Function	1	Q05BX6
5	GO:0030695	GTPase regulator activity	Molecular Function	1	Q05BX6
5	GO:0005342	organic acid transmembrane transporter activity	Molecular Function	1	Q9BYH2
5	GO:0046982	protein heterodimerization activity	Molecular Function	1	A0A1B0GVI7
5	GO:0020037	heme binding	Molecular Function	1	Q16678
5	GO:0008194	UDP-glycosyltransferase activity	Molecular Function	1	Q4G148
5	GO:0003677	DNA binding	Molecular Function	3	B4DXI2, A0A1B0GVI7, Q96AE4
5	GO:0001067	regulatory region nucleic acid binding	Molecular Function	2	B4DXI2, A0A1B0GVI7
5	GO:0015291	secondary active transmembrane transporter activity	Molecular Function	1	Q9BYH2
5	GO:0003723	RNA binding	Molecular Function	3	K7ER90, B4DUP5, Q96AE4
5	GO:0016763	transferase activity, transferring pentosyl groups	Molecular Function	1	Q4G148
5	GO:0003713	transcription coactivator activity	Molecular Function	1	Q5JSB5
5	GO:0015075	ion transmembrane transporter activity	Molecular Function	1	Q9BYH2
5	GO:0015328	cystine secondary active transmembrane transporter activity	Molecular Function	1	Q9BYH2
5	GO:0004842	ubiquitin-protein transferase activity	Molecular Function	1	Q53EY9
5	GO:0046872	metal ion binding	Molecular Function	2	Q16678, G3V1D1
5	GO:0051879	Hsp90 protein binding	Molecular Function	1	A0A1B0GVI7
6	GO:0046943	carboxylic acid transmembrane transporter activity	Molecular Function	1	Q9BYH2
6	GO:0008509	anion transmembrane transporter activity	Molecular Function	1	Q9BYH2
6	GO:0015327	cystine:glutamate antiporter activity	Molecular Function	1	Q9BYH2
6	GO:0042285	xylosyltransferase activity	Molecular Function	1	Q4G148
6	GO:0035252	UDP-xylosyltransferase activity	Molecular Function	1	Q4G148
6	GO:0015297	antiporter activity	Molecular Function	1	Q9BYH2
6	GO:0046914	transition metal ion binding	Molecular Function	2	Q16678, G3V1D1
6	GO:1901680	sulfur-containing amino acid secondary active transmembrane transporter activity	Molecular Function	1	Q9BYH2
6	GO:0008135	translation factor activity, RNA binding	Molecular Function	2	K7ER90, B4DUP5
6	GO:0044822	poly(A) RNA binding	Molecular Function	2	K7ER90, Q96AE4
6	GO:0000975	regulatory region DNA binding	Molecular Function	2	B4DXI2, A0A1B0GVI7
6	GO:0003697	single-stranded DNA binding	Molecular Function	1	Q96AE4
6	GO:0005294	neutral L-amino acid secondary active transmembrane transporter activity	Molecular Function	1	Q9BYH2
7	GO:0003743	translation initiation factor activity	Molecular Function	2	K7ER90, B4DUP5
7	GO:0015171	amino acid transmembrane transporter activity	Molecular Function	1	Q9BYH2
7	GO:0030158	protein xylosyltransferase activity	Molecular Function	1	Q4G148
7	GO:0005506	iron ion binding	Molecular Function	2	Q16678, G3V1D1
7	GO:0008514	organic anion transmembrane transporter activity	Molecular Function	1	Q9BYH2
7	GO:0044212	transcription regulatory region DNA binding	Molecular Function	2	B4DXI2, A0A1B0GVI7
8	GO:0005313	L-glutamate transmembrane transporter activity	Molecular Function	1	Q9BYH2
8	GO:0015172	acidic amino acid transmembrane transporter activity	Molecular Function	1	Q9BYH2
8	GO:0035326	enhancer binding	Molecular Function	1	A0A1B0GVI7
8	GO:0015175	neutral amino acid transmembrane transporter activity	Molecular Function	1	Q9BYH2
8	GO:0008199	ferric iron binding	Molecular Function	1	G3V1D1

## Sheet: CC
GO function annotation and analysis different expressed proteins of ACBP vs. control CC
Level	GO_ID	Term	Type	Seqs_Num	Sequences
1	GO:0005575	cellular_component	Cellular Component	15	Q16678, Q5JSB5, Q4G148, A0A0J9YX89, G3V1D1, Q9BYH2, Q9UDW1, B4DXI2, K7ER90, A0A1B0GVI7, B4DUP5, B4DWS8, Q96AE4, B7ZL14, Q05BX6
2	GO:0031974	membrane-enclosed lumen	Cellular Component	4	B4DXI2, A0A1B0GVI7, Q5JSB5, Q96AE4
2	GO:0043226	organelle	Cellular Component	14	Q16678, Q5JSB5, Q4G148, A0A0J9YX89, G3V1D1, Q9UDW1, Q9BYH2, B4DXI2, K7ER90, A0A1B0GVI7, B4DUP5, Q96AE4, B7ZL14, Q05BX6
2	GO:0044422	organelle part	Cellular Component	7	Q9UDW1, B4DXI2, A0A1B0GVI7, Q16678, Q5JSB5, Q96AE4, Q4G148
2	GO:0005576	extracellular region	Cellular Component	2	Q9UDW1, G3V1D1
2	GO:0032991	macromolecular complex	Cellular Component	8	Q9UDW1, K7ER90, B4DXI2, A0A1B0GVI7, B4DUP5, Q5JSB5, Q96AE4, G3V1D1
2	GO:0044464	cell part	Cellular Component	14	Q16678, Q5JSB5, Q4G148, G3V1D1, Q9BYH2, Q9UDW1, B4DXI2, K7ER90, A0A1B0GVI7, B4DUP5, B4DWS8, Q96AE4, B7ZL14, Q05BX6
2	GO:0044425	membrane part	Cellular Component	3	Q9BYH2, Q9UDW1, Q16678
2	GO:0005623	cell	Cellular Component	14	Q16678, Q5JSB5, Q4G148, G3V1D1, Q9BYH2, Q9UDW1, B4DXI2, K7ER90, A0A1B0GVI7, B4DUP5, B4DWS8, Q96AE4, B7ZL14, Q05BX6
2	GO:0044421	extracellular region part	Cellular Component	2	Q9UDW1, G3V1D1
2	GO:0016020	membrane	Cellular Component	5	Q9BYH2, Q9UDW1, Q16678, B4DWS8, Q4G148
3	GO:0009986	cell surface	Cellular Component	1	Q9BYH2
3	GO:0005622	intracellular	Cellular Component	14	Q16678, Q5JSB5, Q4G148, G3V1D1, Q9BYH2, Q9UDW1, K7ER90, B4DXI2, A0A1B0GVI7, B4DUP5, B4DWS8, Q96AE4, B7ZL14, Q05BX6
3	GO:0031224	intrinsic component of membrane	Cellular Component	2	Q9BYH2, Q9UDW1
3	GO:0070062	extracellular exosome	Cellular Component	2	Q9UDW1, G3V1D1
3	GO:0071944	cell periphery	Cellular Component	1	Q9BYH2
3	GO:0043227	membrane-bounded organelle	Cellular Component	12	Q9UDW1, B4DXI2, K7ER90, A0A1B0GVI7, Q16678, Q5JSB5, Q96AE4, Q4G148, A0A0J9YX89, G3V1D1, B7ZL14, Q05BX6
3	GO:0044424	intracellular part	Cellular Component	14	Q16678, Q5JSB5, Q4G148, G3V1D1, Q9UDW1, Q9BYH2, K7ER90, B4DXI2, A0A1B0GVI7, B4DUP5, B4DWS8, Q96AE4, B7ZL14, Q05BX6
3	GO:1990204	oxidoreductase complex	Cellular Component	1	Q9UDW1
3	GO:0042175	nuclear outer membrane-endoplasmic reticulum membrane network	Cellular Component	1	Q16678
3	GO:0098796	membrane protein complex	Cellular Component	1	Q9UDW1
3	GO:0043229	intracellular organelle	Cellular Component	12	Q16678, Q5JSB5, Q4G148, G3V1D1, Q9UDW1, B4DXI2, K7ER90, A0A1B0GVI7, B4DUP5, Q96AE4, B7ZL14, Q05BX6
3	GO:0043230	extracellular organelle	Cellular Component	2	Q9UDW1, G3V1D1
3	GO:0044446	intracellular organelle part	Cellular Component	7	Q9UDW1, B4DXI2, A0A1B0GVI7, Q16678, Q5JSB5, Q96AE4, Q4G148
3	GO:0043234	protein complex	Cellular Component	8	Q9UDW1, K7ER90, B4DXI2, A0A1B0GVI7, B4DUP5, Q5JSB5, Q96AE4, G3V1D1
3	GO:0044459	plasma membrane part	Cellular Component	1	Q9BYH2
3	GO:0070469	respiratory chain	Cellular Component	1	Q9UDW1
3	GO:0031975	envelope	Cellular Component	1	Q9UDW1
3	GO:1990904	ribonucleoprotein complex	Cellular Component	2	K7ER90, B4DUP5
3	GO:0005789	endoplasmic reticulum membrane	Cellular Component	1	Q16678
3	GO:1903561	extracellular vesicle	Cellular Component	2	Q9UDW1, G3V1D1
3	GO:0031090	organelle membrane	Cellular Component	2	Q9UDW1, Q4G148
3	GO:0012505	endomembrane system	Cellular Component	3	Q16678, Q4G148, Q05BX6
3	GO:0044455	mitochondrial membrane part	Cellular Component	1	Q9UDW1
3	GO:0005886	plasma membrane	Cellular Component	1	Q9BYH2
3	GO:0043233	organelle lumen	Cellular Component	4	B4DXI2, A0A1B0GVI7, Q5JSB5, Q96AE4
3	GO:0043228	non-membrane-bounded organelle	Cellular Component	2	K7ER90, B4DUP5
4	GO:0070069	cytochrome complex	Cellular Component	1	Q9UDW1
4	GO:0098803	respiratory chain complex	Cellular Component	1	Q9UDW1
4	GO:0016021	integral component of membrane	Cellular Component	2	Q9UDW1, Q9BYH2
4	GO:0031966	mitochondrial membrane	Cellular Component	1	Q9UDW1
4	GO:0034751	aryl hydrocarbon receptor complex	Cellular Component	1	A0A1B0GVI7
4	GO:0005768	endosome	Cellular Component	1	Q05BX6
4	GO:0005737	cytoplasm	Cellular Component	13	Q16678, Q5JSB5, Q4G148, G3V1D1, Q9UDW1, K7ER90, B4DXI2, B4DUP5, A0A1B0GVI7, B4DWS8, Q96AE4, B7ZL14, Q05BX6
4	GO:1902494	catalytic complex	Cellular Component	1	Q9UDW1
4	GO:0008043	intracellular ferritin complex	Cellular Component	1	G3V1D1
4	GO:0030529	intracellular ribonucleoprotein complex	Cellular Component	2	K7ER90, B4DUP5
4	GO:0097708	intracellular vesicle	Cellular Component	1	Q05BX6
4	GO:0043232	intracellular non-membrane-bounded organelle	Cellular Component	2	K7ER90, B4DUP5
4	GO:0044429	mitochondrial part	Cellular Component	1	Q9UDW1
4	GO:0044444	cytoplasmic part	Cellular Component	9	Q9UDW1, K7ER90, B4DUP5, A0A1B0GVI7, Q16678, Q4G148, G3V1D1, B7ZL14, Q05BX6
4	GO:0031982	vesicle	Cellular Component	3	Q9UDW1, G3V1D1, Q05BX6
4	GO:0019866	organelle inner membrane	Cellular Component	1	Q9UDW1
4	GO:0044428	nuclear part	Cellular Component	4	B4DXI2, A0A1B0GVI7, Q5JSB5, Q96AE4
4	GO:0005852	eukaryotic translation initiation factor 3 complex	Cellular Component	1	K7ER90
4	GO:0005667	transcription factor complex	Cellular Component	4	B4DXI2, A0A1B0GVI7, Q5JSB5, Q96AE4
4	GO:0098798	mitochondrial protein complex	Cellular Component	1	Q9UDW1
4	GO:0043235	receptor complex	Cellular Component	1	A0A1B0GVI7
4	GO:0005783	endoplasmic reticulum	Cellular Component	1	Q16678
4	GO:1902495	transmembrane transporter complex	Cellular Component	1	Q9UDW1
4	GO:0070013	intracellular organelle lumen	Cellular Component	4	B4DXI2, A0A1B0GVI7, Q5JSB5, Q96AE4
4	GO:0005746	mitochondrial respiratory chain	Cellular Component	1	Q9UDW1
4	GO:0044431	Golgi apparatus part	Cellular Component	1	Q4G148
4	GO:0005851	eukaryotic translation initiation factor 2B complex	Cellular Component	1	B4DUP5
4	GO:0098588	bounding membrane of organelle	Cellular Component	1	Q4G148
4	GO:0043231	intracellular membrane-bounded organelle	Cellular Component	11	Q9UDW1, B4DXI2, K7ER90, A0A1B0GVI7, Q16678, Q5JSB5, Q96AE4, Q4G148, G3V1D1, B7ZL14, Q05BX6
4	GO:1990351	transporter complex	Cellular Component	1	Q9UDW1
4	GO:0045275	respiratory chain complex III	Cellular Component	1	Q9UDW1
4	GO:0005794	Golgi apparatus	Cellular Component	1	Q4G148
4	GO:0070288	ferritin complex	Cellular Component	1	G3V1D1
4	GO:0098800	inner mitochondrial membrane protein complex	Cellular Component	1	Q9UDW1
4	GO:0044432	endoplasmic reticulum part	Cellular Component	1	Q16678
4	GO:0031967	organelle envelope	Cellular Component	1	Q9UDW1
5	GO:0005654	nucleoplasm	Cellular Component	4	B4DXI2, A0A1B0GVI7, Q5JSB5, Q96AE4
5	GO:0005773	vacuole	Cellular Component	1	Q05BX6
5	GO:0031981	nuclear lumen	Cellular Component	4	B4DXI2, A0A1B0GVI7, Q5JSB5, Q96AE4
5	GO:0016023	cytoplasmic, membrane-bounded vesicle	Cellular Component	1	Q05BX6
5	GO:0005840	ribosome	Cellular Component	2	K7ER90, B4DUP5
5	GO:0034752	cytosolic aryl hydrocarbon receptor complex	Cellular Component	1	A0A1B0GVI7
5	GO:0000139	Golgi membrane	Cellular Component	1	Q4G148
5	GO:0031410	cytoplasmic vesicle	Cellular Component	1	Q05BX6
5	GO:0005829	cytosol	Cellular Component	3	A0A1B0GVI7, B4DUP5, G3V1D1
5	GO:0005739	mitochondrion	Cellular Component	1	Q9UDW1
5	GO:0005743	mitochondrial inner membrane	Cellular Component	1	Q9UDW1
5	GO:0031988	membrane-bounded vesicle	Cellular Component	3	Q9UDW1, G3V1D1, Q05BX6
5	GO:0005740	mitochondrial envelope	Cellular Component	1	Q9UDW1
5	GO:0044445	cytosolic part	Cellular Component	1	A0A1B0GVI7
5	GO:0005769	early endosome	Cellular Component	1	Q05BX6
5	GO:0005750	mitochondrial respiratory chain complex III	Cellular Component	1	Q9UDW1
5	GO:0005634	nucleus	Cellular Component	6	B4DXI2, K7ER90, A0A1B0GVI7, Q5JSB5, Q96AE4, G3V1D1
6	GO:0030139	endocytic vesicle	Cellular Component	1	Q05BX6

## Sheet: Enrichment
GO function annotation and analysis different expressed proteins of ACBP vs. control Enrichment
GO_ID	Term	Category	Test	Ref	TestAll	RefAll	Test_per	Ref_per	Over_Under	TestSeqs	RefSeqs	P value	FDR	richFactor
GO:0009636	response to toxic substance	P	2	25	17	6210	0.117647	0.00402576	over	Q9BYH2, A0A1B0GVI7	Q8WVM8, Q2VEU1, P30048, B4DF70, A0A1B0GVI7, Q13162, P21266, P07099, P00441, B4E1M2, B7ZKK7, P06727, A0A024QZY0, Q06830, P15559, P46439, Q9BYH2, B3KNA1, Q99497, Q07812, P09960, P09488, B4E2J2, H3BLU7, E7EMT5	0.00203933	0.154167	0.08
GO:0015327	cystine:glutamate antiporter activity	F	1	1	17	6210	0.0588235	0.000161031	over	Q9BYH2	Q9BYH2	0.00273752	0.154167	1
GO:0005294	neutral L-amino acid secondary active transmembrane transporter activity	F	1	1	17	6210	0.0588235	0.000161031	over	Q9BYH2	Q9BYH2	0.00273752	0.154167	1
GO:0008043	intracellular ferritin complex	C	1	1	17	6210	0.0588235	0.000161031	over	G3V1D1	G3V1D1	0.00273752	0.154167	1
GO:1901680	sulfur-containing amino acid secondary active transmembrane transporter activity	F	1	1	17	6210	0.0588235	0.000161031	over	Q9BYH2	Q9BYH2	0.00273752	0.154167	1
GO:0097267	omega-hydroxylase P450 pathway	P	1	1	17	6210	0.0588235	0.000161031	over	Q16678	Q16678	0.00273752	0.154167	1
GO:0015328	cystine secondary active transmembrane transporter activity	F	1	1	17	6210	0.0588235	0.000161031	over	Q9BYH2	Q9BYH2	0.00273752	0.154167	1
GO:0034751	aryl hydrocarbon receptor complex	C	1	1	17	6210	0.0588235	0.000161031	over	A0A1B0GVI7	A0A1B0GVI7	0.00273752	0.154167	1
GO:0070288	ferritin complex	C	1	1	17	6210	0.0588235	0.000161031	over	G3V1D1	G3V1D1	0.00273752	0.154167	1
GO:0004874	aryl hydrocarbon receptor activity	F	1	1	17	6210	0.0588235	0.000161031	over	A0A1B0GVI7	A0A1B0GVI7	0.00273752	0.154167	1
GO:0034752	cytosolic aryl hydrocarbon receptor complex	C	1	1	17	6210	0.0588235	0.000161031	over	A0A1B0GVI7	A0A1B0GVI7	0.00273752	0.154167	1
GO:0030158	protein xylosyltransferase activity	F	1	2	17	6210	0.0588235	0.000322061	over	Q4G148	Q4G148, Q9H1B5	0.00546799	0.154167	0.5
GO:0061298	retina vasculature development in camera-type eye	P	1	2	17	6210	0.0588235	0.000322061	over	Q16678	Q16678, O75197	0.00546799	0.154167	0.5
GO:1904234	positive regulation of aconitate hydratase activity	P	1	2	17	6210	0.0588235	0.000322061	over	G3V1D1	G3V1D1, C9JAX1	0.00546799	0.154167	0.5
GO:0000099	sulfur amino acid transmembrane transporter activity	F	1	2	17	6210	0.0588235	0.000322061	over	Q9BYH2	Q9BYH2, B2R7N6	0.00546799	0.154167	0.5
GO:0072349	modified amino acid transmembrane transporter activity	F	1	2	17	6210	0.0588235	0.000322061	over	Q9BYH2	Q9BYH2, B2R7N6	0.00546799	0.154167	0.5
GO:0008199	ferric iron binding	F	1	2	17	6210	0.0588235	0.000322061	over	G3V1D1	G3V1D1, C9JAX1	0.00546799	0.154167	0.5
GO:1904232	regulation of aconitate hydratase activity	P	1	2	17	6210	0.0588235	0.000322061	over	G3V1D1	G3V1D1, C9JAX1	0.00546799	0.154167	0.5
GO:1904229	regulation of succinate dehydrogenase activity	P	1	2	17	6210	0.0588235	0.000322061	over	G3V1D1	G3V1D1, C9JAX1	0.00546799	0.154167	0.5
GO:1904231	positive regulation of succinate dehydrogenase activity	P	1	2	17	6210	0.0588235	0.000322061	over	G3V1D1	G3V1D1, C9JAX1	0.00546799	0.154167	0.5
GO:0097577	sequestering of iron ion	P	1	2	17	6210	0.0588235	0.000322061	over	G3V1D1	G3V1D1, C9J0K6	0.00546799	0.154167	0.5
GO:0015811	L-cystine transport	P	1	2	17	6210	0.0588235	0.000322061	over	Q9BYH2	Q9BYH2, B2R7N6	0.00546799	0.154167	0.5
GO:0019373	epoxygenase P450 pathway	P	1	2	17	6210	0.0588235	0.000322061	over	Q16678	Q8N3P5, Q16678	0.00546799	0.154167	0.5
GO:0006880	intracellular sequestering of iron ion	P	1	2	17	6210	0.0588235	0.000322061	over	G3V1D1	G3V1D1, C9J0K6	0.00546799	0.154167	0.5
GO:0005506	iron ion binding	F	2	42	17	6210	0.117647	0.00676329	over	Q16678, G3V1D1	O00767, B4DGN8, Q6ZMT4, B4E1V0, A0A0K2BMD8, G3V1D1, B7UCU6, H0YJF3, A0A0K0K1H7, Q5VSQ6, O95571, H0Y589, O60568, A0A1B0GUC3, B1P7G3, P08582, H7C5E8, Q96SQ9, B3VL17, Q96T46, B2WTI3, B4DHG3, Q9UMS0, Q8N3P5, Q15800, Q9NXG6, Q16678, U3PXP0, P10109, Q8IVL5, P13674, J3QRG1, B4E2H5, A0A0A0MTR2, Q8NFU7, Q05DA4, Q32P28, B3KRC6, C9JAX1, Q53RS5, E7EMT5, Q9NVH6	0.00569506	0.154167	0.047619
GO:0003743	translation initiation factor activity	F	2	42	17	6210	0.117647	0.00676329	over	K7ER90, B4DUP5	B4DMT5, J9R021, O75822, B4DEP6, P46199, A0A087WUT6, K7EL20, B4DVQ5, P55010, Q9UBQ5, P05198, Q13144, P47813, Q14232, P41214, P49770, O15371, O15372, Q13347, O43583, C9JEL3, Q9BY44, E7EUU4, Q92905, Q9NR50, P41091, H0Y3P2, A8K7F6, K7ER90, Q6IAM0, B4DUP5, Q9UI10, Q14240, Q7L2H7, Q9Y262, P20042, B4DV79, P60228, P41567, P06730, Q15056, A0A024RDQ7	0.00569506	0.154167	0.047619
GO:0048511	rhythmic process	P	2	45	17	6210	0.117647	0.00724638	over	B4DUP5, A0A1B0GVI7	Q09472, Q9UPN1, A0A024R8X3, A8K525, B4DWI8, B4DJ75, P50416, P11387, A0A087WUK2, A0A1B0GVI7, B3KUJ5, O15379, Q05D20, Q9BQG0, P62136, Q9UNS1, Q13144, Q12771, E7ESY4, P23246, O43463, P49770, O15294, Q9BQ04, Q7Z5J4, Q96NB3, P43490, A0A024RDF4, B5BU61, Q06210, Q05086, Q8TEN0, A0A088AWL3, Q9NRV9, Q03164, Q9BWF3, B4DUP5, Q9BXB1, Q9UI10, P49841, Q13131, Q96EB6, Q9Y2W1, Q75MP9, H0YFV6	0.00651685	0.154167	0.0444444
GO:0006805	xenobiotic metabolic process	P	2	49	17	6210	0.117647	0.0078905	over	A0A1B0GVI7, Q16678	Q8IZ83, H0YKF9, B2RBJ8, Q8TDM2, P16930, C9J8Q5, P05091, B2R983, A0A1B0GVI7, P09211, P30038, B7Z5T5, Q16678, P30837, O00519, A0A087X243, O14880, A0A024QZY0, Q02252, P19224, O60218, Q93099, B5MCK8, P30838, B4E2J2, F8W9A8, B2RD36, B4E394, P10696, H0YHN9, P51648, Q6U7I7, P16435, P21266, P07099, P47895, B4E1M2, P10620, P15559, Q08257, P46439, P24666, P09960, P09488, Q15493, H3BLU7, P0DMM9, P00352, Q99…	0.00769165	0.154167	0.0408163
GO:0001071	nucleic acid binding transcription factor activity	F	3	153	17	6210	0.176471	0.0246377	over	A0A1B0GVI7, Q5JSB5, Q96AE4	Q92618, P78545, Q9UKL0, Q5JSB5, P67809, M0R205, B5BTZ6, A0A024RAV4, C9JWJ8, C9J7K9, Q9Y3Q8, O00268, Q53RD8, P15531, P42224, Q96T88, H0YG25, E5KSX8, P17275, Q5XKR4, Q2TAM5, B4DUQ1, H0Y5N4, B4DHI1, Q15545, Q5T6U8, F8VSL3, H0YLC5, Q96I24, B3KUR4, X5DRF3, B2RAI2, E7ES08, P55316, E9PQX9, Q2NLD4, B2R8X4, H0UI99, A8K6Y1, Q96QR8, B4E1P2, A4D1Z4, O15525, B4E0X8, Q12962, A0A024R2J0, Q9UQR0, O95218, A0A024R…	0.00773688	0.154167	0.0196078
GO:0003700	transcription factor activity, sequence-specific DNA binding	F	3	153	17	6210	0.176471	0.0246377	over	A0A1B0GVI7, Q5JSB5, Q96AE4	P78545, Q92618, Q9UKL0, P67809, Q5JSB5, M0R205, B5BTZ6, A0A024RAV4, C9JWJ8, C9J7K9, Q9Y3Q8, O00268, Q53RD8, P15531, P42224, H0YG25, Q96T88, E5KSX8, P17275, Q5XKR4, Q2TAM5, B4DUQ1, H0Y5N4, B4DHI1, Q15545, Q5T6U8, F8VSL3, H0YLC5, Q96I24, B3KUR4, X5DRF3, B2RAI2, E7ES08, P55316, E9PQX9, Q2NLD4, B2R8X4, H0UI99, A8K6Y1, B4E1P2, Q96QR8, A4D1Z4, O15525, B4E0X8, Q12962, A0A024R2J0, Q9UQR0, O95218, A0A024R…	0.00773688	0.154167	0.0196078
GO:0009410	response to xenobiotic stimulus	P	2	50	17	6210	0.117647	0.00805153	over	A0A1B0GVI7, Q16678	Q9UH17, Q8IZ83, H0YKF9, Q8TDM2, B2RBJ8, P16930, C9J8Q5, P05091, A0A1B0GVI7, B2R983, P09211, P30038, B7Z5T5, Q16678, P30837, A0A087X243, O14880, A0A024QZY0, O00519, Q02252, P19224, O60218, Q93099, B5MCK8, P30838, B4E2J2, F8W9A8, B2RD36, B4E394, P10696, H0YHN9, P51648, Q6U7I7, P16435, P07099, P21266, P47895, B4E1M2, P10620, P15559, Q08257, P46439, P09960, P24666, P09488, Q15493, H3BLU7, P0DMM9, Q99…	0.00799928	0.154167	0.04
GO:0071466	cellular response to xenobiotic stimulus	P	2	50	17	6210	0.117647	0.00805153	over	A0A1B0GVI7, Q16678	Q9UH17, Q8IZ83, H0YKF9, Q8TDM2, B2RBJ8, P16930, C9J8Q5, P05091, A0A1B0GVI7, B2R983, P09211, P30038, B7Z5T5, Q16678, P30837, A0A087X243, O14880, A0A024QZY0, O00519, Q02252, P19224, O60218, Q93099, B5MCK8, P30838, B4E2J2, F8W9A8, B2RD36, B4E394, P10696, H0YHN9, P51648, Q6U7I7, P16435, P07099, P21266, P47895, B4E1M2, P10620, P15559, Q08257, P46439, P09960, P24666, P09488, Q15493, H3BLU7, P0DMM9, Q99…	0.00799928	0.154167	0.04
GO:0000101	sulfur amino acid transport	P	1	3	17	6210	0.0588235	0.000483092	over	Q9BYH2	Q9BYH2, M0R106, B2R7N6	0.00819141	0.154167	0.333333
GO:0005750	mitochondrial respiratory chain complex III	C	1	3	17	6210	0.0588235	0.000483092	over	Q9UDW1	Q9UDW1, P14927, H7C492	0.00819141	0.154167	0.333333
GO:0016712	oxidoreductase activity, acting on paired donors, with incorporation or reduction of molecular oxygen, reduced flavin or flavoprotein as one donor, and incorporation of one atom of oxygen	F	1	3	17	6210	0.0588235	0.000483092	over	Q16678	Q16678, Q96SQ9, E7EMT5	0.00819141	0.154167	0.333333
GO:0048147	negative regulation of fibroblast proliferation	P	1	3	17	6210	0.0588235	0.000483092	over	G3V1D1	Q6P1J9, G3V1D1, P50402	0.00819141	0.154167	0.333333
GO:0042285	xylosyltransferase activity	F	1	3	17	6210	0.0588235	0.000483092	over	Q4G148	Q4G148, B3KP69, Q9H1B5	0.00819141	0.154167	0.333333
GO:0035252	UDP-xylosyltransferase activity	F	1	3	17	6210	0.0588235	0.000483092	over	Q4G148	Q4G148, B3KP69, Q9H1B5	0.00819141	0.154167	0.333333
GO:0015846	polyamine transport	P	1	3	17	6210	0.0588235	0.000483092	over	Q9BYH2	Q9BYH2, M0R106, H0Y953	0.00819141	0.154167	0.333333
GO:0060041	retina development in camera-type eye	P	1	4	17	6210	0.0588235	0.000644122	over	Q16678	Q16678, O96019, O75197, P51532	0.0109078	0.192212	0.25
GO:0072337	modified amino acid transport	P	1	4	17	6210	0.0588235	0.000644122	over	Q9BYH2	Q9BYH2, B2R7N6, B4DUQ5, P05543	0.0109078	0.192212	0.25
GO:0008135	translation factor activity, RNA binding	F	2	64	17	6210	0.117647	0.010306	over	K7ER90, B4DUP5	J9R021, O75822, Q9BW34, P46199, A0A087WUT6, J3KS15, A0A0U1RQK7, B4DQM6, A0A024RAJ7, P41214, P49770, O15371, O15372, C9JEL3, P49411, Q13888, E7EUU4, B7Z7P8, P41091, A8K7F6, Q05639, P68104, Q9UI10, Q7L2H7, P20042, B4DV79, P60228, P41567, B4DMT5, P26641, B4DEP6, I3L397, K7EL20, B4DVQ5, H3BR35, P55010, P24534, Q9UBQ5, P05198, B4DNE0, Q13144, P47813, Q14232, P43897, Q13347, O43583, Q9BY44, O00418, A0A…	0.0128721	0.192212	0.03125
GO:0005667	transcription factor complex	C	4	351	17	6210	0.235294	0.0565217	over	B4DXI2, A0A1B0GVI7, Q5JSB5, Q96AE4	Q92618, G5E9G6, B4E299, F2Z2V0, Q5T911, Q5JSB5, M0R205, B5BTZ6, B3KR25, O00268, Q53RD8, P13984, A5YKK6, Q8TDD1, I3L412, Q562L9, H3BT57, E7ETD6, Q9ULW3, Q9BQG0, Q14690, P27348, A8K2R3, B3KM81, D6RHI7, F2Z2U4, B2R506, O94906, A0A024R669, Q15545, B4DHI1, Q16512, F8VSL3, H0YLC5, Q5VTR2, Q3SY98, A0A169TED2, M0R2P1, B3KRT9, E7ES08, Q5JTV1, E9PQX9, O75381, B1APR7, B2R8X4, Q92841, A8K6Y1, B4DYZ9, C9J7T7,…	0.0132754	0.192212	0.011396
GO:0004879	RNA polymerase II transcription factor activity, ligand-activated sequence-specific DNA binding	F	1	5	17	6210	0.0588235	0.000805153	over	A0A1B0GVI7	A0A1B0GVI7, F1DAL7, B5BTZ6, Q96F89, Q06310	0.0136172	0.192212	0.2
GO:0005313	L-glutamate transmembrane transporter activity	F	1	5	17	6210	0.0588235	0.000805153	over	Q9BYH2	Q9BYH2, B3KMV8, Q53GR7, M0R106, E9PJH7	0.0136172	0.192212	0.2
GO:0015172	acidic amino acid transmembrane transporter activity	F	1	5	17	6210	0.0588235	0.000805153	over	Q9BYH2	Q9BYH2, B3KMV8, Q53GR7, M0R106, E9PJH7	0.0136172	0.192212	0.2
GO:0098531	transcription factor activity, direct ligand regulated sequence-specific DNA binding	F	1	5	17	6210	0.0588235	0.000805153	over	A0A1B0GVI7	A0A1B0GVI7, F1DAL7, B5BTZ6, Q96F89, Q06310	0.0136172	0.192212	0.2
GO:0015813	L-glutamate transport	P	1	5	17	6210	0.0588235	0.000805153	over	Q9BYH2	Q9BYH2, B3KMV8, Q53GR7, M0R106, E9PJH7	0.0136172	0.192212	0.2
GO:0030888	regulation of B cell proliferation	P	1	5	17	6210	0.0588235	0.000805153	over	A0A1B0GVI7	A0A1B0GVI7, P60033, P14174, K7ENH8, A6MUU8	0.0136172	0.192212	0.2
GO:0022602	ovulation cycle process	P	1	5	17	6210	0.0588235	0.000805153	over	B4DUP5	P49770, B4DUP5, Q96NB3, Q9UI10, Q13144	0.0136172	0.192212	0.2
GO:0001541	ovarian follicle development	P	1	5	17	6210	0.0588235	0.000805153	over	B4DUP5	P49770, B4DUP5, Q96NB3, Q9UI10, Q13144	0.0136172	0.192212	0.2
GO:0042698	ovulation cycle	P	1	5	17	6210	0.0588235	0.000805153	over	B4DUP5	P49770, B4DUP5, Q96NB3, Q9UI10, Q13144	0.0136172	0.192212	0.2
GO:0046545	development of primary female sexual characteristics	P	1	6	17	6210	0.0588235	0.000966184	over	B4DUP5	P49770, B4DUP5, Q96NB3, Q9UI10, Q13144, P55316	0.0163196	0.199644	0.166667
GO:0015800	acidic amino acid transport	P	1	6	17	6210	0.0588235	0.000966184	over	Q9BYH2	Q9BYH2, B3KMV8, Q53GR7, Q15758, M0R106, E9PJH7	0.0163196	0.199644	0.166667
GO:0051349	positive regulation of lyase activity	P	1	6	17	6210	0.0588235	0.000966184	over	G3V1D1	B2RDY9, Q99497, O43306, G3V1D1, C9JAX1, B0AZR9	0.0163196	0.199644	0.166667
GO:0050650	chondroitin sulfate proteoglycan biosynthetic process	P	1	6	17	6210	0.0588235	0.000966184	over	Q4G148	Q86X52, Q8IZ52, Q4G148, Q9H1B5, Q499Z2, G3V150	0.0163196	0.199644	0.166667
GO:1901682	sulfur compound transmembrane transporter activity	F	1	6	17	6210	0.0588235	0.000966184	over	Q9BYH2	Q9BYH2, Q7Z7J1, B2R7N6, Q59GD7, B3KVY9, Q5Y190	0.0163196	0.199644	0.166667
GO:0030206	chondroitin sulfate biosynthetic process	P	1	6	17	6210	0.0588235	0.000966184	over	Q4G148	Q86X52, Q8IZ52, Q4G148, Q9H1B5, Q499Z2, G3V150	0.0163196	0.199644	0.166667
GO:0008585	female gonad development	P	1	6	17	6210	0.0588235	0.000966184	over	B4DUP5	P49770, B4DUP5, Q96NB3, Q9UI10, Q13144, P55316	0.0163196	0.199644	0.166667
GO:0046660	female sex differentiation	P	1	6	17	6210	0.0588235	0.000966184	over	B4DUP5	P49770, B4DUP5, Q96NB3, Q9UI10, Q13144, P55316	0.0163196	0.199644	0.166667
GO:0006446	regulation of translational initiation	P	2	78	17	6210	0.117647	0.0125604	over	K7ER90, B4DUP5	J9R021, Q71UM5, O75822, P46199, A0A087WUT6, B4DDX2, Q9UBS0, A0A0U1RQK7, H0YAS6, Q9Y5A9, Q92499, B4DT65, Q5TA58, C9JAB9, P41214, C9J185, P49770, O15371, O15372, B7ZKK7, C9JEL3, P06748, Q09161, H0YME5, E7EUU4, B4DDM0, Q53TG4, P41091, Q9H074, A8K7F6, Q9BWF3, A0A0D9SFB3, P12270, Q9UI10, Q7L2H7, H0YAR2, P20042, B4DV79, P60228, P41567, B4DMT5, P52298, Q9UKV8, B4DEP6, A0A087WTT1, Q13217, H0YEQ8, K7EL20,…	0.0187486	0.211471	0.025641
GO:0008083	growth factor activity	F	1	7	17	6210	0.0588235	0.00112721	over	Q05BX6	B3KRW4, E9PPJ5, C8C069, Q05BX6, B4DDT3, B4DJI2, Q99988	0.0190151	0.211471	0.142857
GO:0050864	regulation of B cell activation	P	1	7	17	6210	0.0588235	0.00112721	over	A0A1B0GVI7	A0A1B0GVI7, P60033, P14174, K7ENH8, A6MUU8, K9J972, S6FRS6	0.0190151	0.211471	0.142857
GO:0014003	oligodendrocyte development	P	1	7	17	6210	0.0588235	0.00112721	over	B4DUP5	P49770, B4DUP5, Q9NR50, Q9UI10, Q13144, Q8IWL5, Q14232	0.0190151	0.211471	0.142857
GO:0075525	viral translational termination-reinitiation	P	1	7	17	6210	0.0588235	0.00112721	over	K7ER90	O15371, K7EL20, K7ER90, J9R021, Q6IAM0, Q9Y262, B4DV79	0.0190151	0.211471	0.142857
GO:0005851	eukaryotic translation initiation factor 2B complex	C	1	7	17	6210	0.0588235	0.00112721	over	B4DUP5	P49770, B4DUP5, Q9NR50, Q9UI10, P05198, Q13144, Q14232	0.0190151	0.211471	0.142857
GO:0050654	chondroitin sulfate proteoglycan metabolic process	P	1	8	17	6210	0.0588235	0.00128824	over	Q4G148	Q9BVJ8, Q86X52, Q8IZ52, Q4G148, Q9H1B5, Q499Z2, P07686, G3V150	0.0217036	0.218225	0.125
GO:0048709	oligodendrocyte differentiation	P	1	8	17	6210	0.0588235	0.00128824	over	B4DUP5	P49770, B4DUP5, Q00535, Q9NR50, Q9UI10, Q13144, Q8IWL5, Q14232	0.0217036	0.218225	0.125
GO:0045275	respiratory chain complex III	C	1	8	17	6210	0.0588235	0.00128824	over	Q9UDW1	P31930, Q9UDW1, P14927, O14949, P47985, A0A059RS35, H7C492, Q567R0	0.0217036	0.218225	0.125
GO:0015804	neutral amino acid transport	P	1	8	17	6210	0.0588235	0.00128824	over	Q9BYH2	A8K6H9, Q8NCD8, Q9BYH2, Q15758, M0R106, H0YF42, B2R7N6, Q01650	0.0217036	0.218225	0.125
GO:0072348	sulfur compound transport	P	1	8	17	6210	0.0588235	0.00128824	over	Q9BYH2	B2RE34, Q9BYH2, M0R106, Q59GD7, B2R7N6, O00400, B3KVY9, Q5Y190	0.0217036	0.218225	0.125
GO:0042574	retinal metabolic process	P	1	8	17	6210	0.0588235	0.00128824	over	Q16678	B4DK69, Q8TC12, Q16678, H0YKF9, Q8IZV5, P47895, P17516, A0A0A0MSS8	0.0217036	0.218225	0.125
GO:0030204	chondroitin sulfate metabolic process	P	1	8	17	6210	0.0588235	0.00128824	over	Q4G148	Q9BVJ8, Q86X52, Q8IZ52, Q4G148, Q9H1B5, Q499Z2, P07686, G3V150	0.0217036	0.218225	0.125
GO:0019369	arachidonic acid metabolic process	P	1	9	17	6210	0.0588235	0.00144928	over	Q16678	Q8N3P5, Q16678, P16152, O00519, Q15185, A0A0A0MSS8, A0A024QZX9, E7EMT5, A8K2S1	0.0243852	0.238649	0.111111
GO:0051879	Hsp90 protein binding	F	1	9	17	6210	0.0588235	0.00144928	over	A0A1B0GVI7	H3BUD0, P23396, A0A1B0GVI7, B3KNA1, E7EU96, B4DFV7, A0A024R394, E5KN59, E7ESU0	0.0243852	0.238649	0.111111
GO:0042552	myelination	P	1	10	17	6210	0.0588235	0.00161031	over	B4DUP5	H0YAN8, P49770, B4DPP0, Q8N959, B4DUP5, A0A0A0MTB0, Q9UI10, Q59FR5, Q13144, Q8IWL5	0.0270598	0.23978	0.1
GO:0019825	oxygen binding	F	1	10	17	6210	0.0588235	0.00161031	over	Q16678	U6FM64, Q16678, U3PXP0, B4DUI1, A0A0K2BMD8, B7UCU6, B3VL17, F6KPG5, Q96T46, B7Z6W5	0.0270598	0.23978	0.1
GO:0007272	ensheathment of neurons	P	1	10	17	6210	0.0588235	0.00161031	over	B4DUP5	H0YAN8, P49770, B4DPP0, Q8N959, B4DUP5, A0A0A0MTB0, Q9UI10, Q59FR5, Q13144, Q8IWL5	0.0270598	0.23978	0.1
GO:0042100	B cell proliferation	P	1	10	17	6210	0.0588235	0.00161031	over	A0A1B0GVI7	P17812, A0A1B0GVI7, P60033, P14174, K7ENH8, A6MUU8, B9VP24, P10809, Q9NRF8, B7Z532	0.0270598	0.23978	0.1
GO:0008366	axon ensheathment	P	1	10	17	6210	0.0588235	0.00161031	over	B4DUP5	H0YAN8, P49770, B4DPP0, Q8N959, B4DUP5, A0A0A0MTB0, Q9UI10, Q59FR5, Q13144, Q8IWL5	0.0270598	0.23978	0.1
GO:0043010	camera-type eye development	P	1	10	17	6210	0.0588235	0.00161031	over	Q16678	Q6SYC2, Q16678, Q15648, O96019, Q15042, O75197, P29317, P51532, Q9HCK8, P55316	0.0270598	0.23978	0.1
GO:0006122	mitochondrial electron transport, ubiquinol to cytochrome c	P	1	10	17	6210	0.0588235	0.00161031	over	Q9UDW1	P31930, Q9UDW1, Q8TBT6, O14949, P14927, P22695, P47985, A0A059RS35, C9JFR7, Q567R0	0.0270598	0.23978	0.1
GO:0001568	blood vessel development	P	2	96	17	6210	0.117647	0.0154589	over	A0A1B0GVI7, Q16678	O43474, F6R503, M0QY43, P19174, A8K3K1, P12259, Q53SF4, Q53TD0, Q96BN8, O75340, P52799, Q9NS00, Q969H8, P35579, P35580, P42224, Q562L9, B2R7U4, Q5JR08, A0A024RAR8, A0A1B0GVI7, H3BT57, Q9BUG9, Q562T9, P61586, P05771, P07355, B1N7G7, P07996, B4DL02, C9J185, H0Y5N4, K4ENJ5, Q16678, Q9UII2, P12429, A0A024R9Q8, A0A169TED2, B4DJ85, B4DH43, A0A024R3E0, P19338, Q9BZL6, B4DTL8, B2R8X4, A0A087X1F5, M0QXF7,…	0.0276611	0.23978	0.0208333
GO:0051339	regulation of lyase activity	P	1	11	17	6210	0.0588235	0.00177134	over	G3V1D1	Q9UBK8, B2RDY9, Q99497, O43306, B3KP24, Q6FIE5, G3V1D1, P08754, C9JAX1, B0AZR9, B3KMX3	0.0297275	0.23978	0.0909091
GO:0003333	amino acid transmembrane transport	P	1	11	17	6210	0.0588235	0.00177134	over	Q9BYH2	A8K6H9, Q8NCD8, Q9BYH2, Q15758, M0R106, H0YF42, Q01650, B2R7N6, B2R728, Q9HBR0, Q92536	0.0297275	0.23978	0.0909091
GO:0015175	neutral amino acid transmembrane transporter activity	F	1	11	17	6210	0.0588235	0.00177134	over	Q9BYH2	A8K6H9, Q9BYH2, Q8NCD8, Q15758, A0A0A0MTB0, M0R106, Q9NRX5, H0YF42, B2R7N6, Q01650, B4DHI5	0.0297275	0.23978	0.0909091
GO:0048145	regulation of fibroblast proliferation	P	1	11	17	6210	0.0588235	0.00177134	over	G3V1D1	Q6P1J9, P14174, Q00534, F8VYH9, A6MUU8, G3V1D1, B4DL06, Q5T8Z6, P02751, P50402, O43181	0.0297275	0.23978	0.0909091
GO:0070577	lysine-acetylated histone binding	F	1	11	17	6210	0.0588235	0.00177134	over	B4DXI2	Q8WWQ0, O60885, B4DXI2, Q9ULI0, Q9UIG0, B4DS09, X5CF57, B4DYZ9, A0A024R6Q8, P51532, Q03164	0.0297275	0.23978	0.0909091
GO:0048144	fibroblast proliferation	P	1	11	17	6210	0.0588235	0.00177134	over	G3V1D1	Q6P1J9, P14174, Q00534, F8VYH9, A6MUU8, G3V1D1, B4DL06, Q5T8Z6, P02751, P50402, O43181	0.0297275	0.23978	0.0909091
GO:0021782	glial cell development	P	1	11	17	6210	0.0588235	0.00177134	over	B4DUP5	H0YAN8, P49770, Q8N959, B4DUP5, Q00534, Q9NR50, Q9UI10, H0Y465, Q13144, Q8IWL5, Q14232	0.0297275	0.23978	0.0909091
GO:0030166	proteoglycan biosynthetic process	P	1	11	17	6210	0.0588235	0.00177134	over	Q4G148	Q86X52, Q8IZ52, Q8NCH0, Q6NUL1, Q4G148, Q9H2A9, Q9H1B5, K7EN15, Q499Z2, G3V150, B4DL06	0.0297275	0.23978	0.0909091
GO:0051353	positive regulation of oxidoreductase activity	P	1	12	17	6210	0.0588235	0.00193237	over	G3V1D1	A2RQD7, Q99497, P31749, J3QL41, G3V1D1, C9JAX1, Q15554, P31751, P16435, A0A0S2Z3V0, B7ZKQ9, Q969G6	0.0323884	0.255624	0.0833333
GO:0042572	retinol metabolic process	P	1	12	17	6210	0.0588235	0.00193237	over	Q16678	B4DK69, O75911, Q8TC12, Q16678, H0YKF9, Q8IZV5, P47895, P17516, A0A0A0MSS8, C9IZF6, P00352, O60218	0.0323884	0.255624	0.0833333
GO:0001944	vasculature development	P	2	109	17	6210	0.117647	0.0175523	over	A0A1B0GVI7, Q16678	B4DLX6, P19174, A8K3K1, P12259, Q53SF4, Q96BN8, P52799, Q9NS00, P42224, Q562L9, B2R7U4, Q5JR08, H3BT57, Q9BUG9, Q562T9, P07355, P07996, H0Y5N4, B4DL02, C9J185, Q9UII2, P12429, A0A169TED2, C8C069, P55316, P19338, B2R8X4, A0A087X1F5, M0QXF7, B4DU18, I3L425, A0A024RC87, A5YM53, A4D1Z4, Q96EB6, B4E335, H0Y465, Q03135, H6TXS1, Q86UE4, P32929, B4DL06, B2R6U9, B2WTI3, B7Z952, H3BSJ6, Q59GN8, P04626, P23…	0.0349707	0.255903	0.0183486
GO:0019081	viral translation	P	1	13	17	6210	0.0588235	0.0020934	over	K7ER90	B4DMT5, O15371, J9R021, B5BUB5, K7EL20, K7ER90, Q6IAM0, H3BRU6, A0A0U1RRM4, Q9Y262, B4DV79, Q15365, A6NLN1	0.0350424	0.255903	0.0769231
GO:0019748	secondary metabolic process	P	1	13	17	6210	0.0588235	0.0020934	over	Q16678	B4DK69, Q8N4T8, B4DZG7, Q16678, P17516, Q9NQ88, O60218, P18669, P15121, J3QL41, H3BLU7, A0A0A0MSS8, E7EMT5	0.0350424	0.255903	0.0769231
GO:0000080	mitotic G1 phase	P	1	13	17	6210	0.0588235	0.0020934	over	Q5JSB5	Q5JSB5, Q5T179, A0A0C4DGX4, Q9UH60, Q00534, F8VYH9, P62987, B4DTN0, P62979, B4DHK6, Q2MJK0, D6RHI7, Q16254	0.0350424	0.255903	0.0769231
GO:0004497	monooxygenase activity	F	1	13	17	6210	0.0588235	0.0020934	over	Q16678	Q15800, Q8N3P5, B4DK69, Q9Y2Z9, Q16678, Q9BU89, Q7RTP6, P17516, B4DHX0, Q96SQ9, B3KRC6, A0A0A0MSS8, E7EMT5	0.0350424	0.255903	0.0769231
GO:0008210	estrogen metabolic process	P	1	13	17	6210	0.0588235	0.0020934	over	Q16678	B4DK69, F5H324, Q15738, Q16678, Q9NRW5, P17516, P37059, O60218, Q15125, P08842, A0A0A0MSS8, P0DMM9, B2R659	0.0350424	0.255903	0.0769231
GO:0051318	G1 phase	P	1	13	17	6210	0.0588235	0.0020934	over	Q5JSB5	Q5JSB5, Q5T179, A0A0C4DGX4, Q9UH60, Q00534, F8VYH9, P62987, B4DTN0, P62979, B4DHK6, Q2MJK0, D6RHI7, Q16254	0.0350424	0.255903	0.0769231
GO:0010948	negative regulation of cell cycle process	P	2	110	17	6210	0.117647	0.0177134	over	B4DXI2, Q5JSB5	I3L4A2, O43670, Q6P1J9, Q5JSB5, Q96K76, O43715, A5YKK6, O00148, O60566, Q9Y6G9, Q9UH60, F8VYH9, Q8N3U4, Q9C0C2, A0A0S2Z3I0, Q13769, P33981, Q7Z5X8, B7Z6J7, B2R7E8, A4LAA3, Q96CF2, P14174, P12270, Q5JSL0, J3QR41, Q15554, Q05D30, Q09472, Q13257, H6WA46, Q9UN37, A0A024RB10, O75367, B0AZQ4, K7EIU4, Q9P119, A8K4G7, B4DXI2, B2RTX8, Q00534, B7Z9U0, Q16254, Q9UMS4, F5H2U8, Q86XZ2, P31947, A0A024R6Q8, B3K…	0.0355615	0.255903	0.0181818
GO:0072358	cardiovascular system development	P	2	110	17	6210	0.117647	0.0177134	over	A0A1B0GVI7, Q16678	B4DLX6, P19174, A8K3K1, P12259, Q53SF4, Q96BN8, P52799, Q9NS00, Q562L9, P42224, B2R7U4, Q5JR08, H3BT57, Q9BUG9, Q562T9, P07355, P07996, H0Y5N4, B4DL02, C9J185, Q9UII2, P12429, A0A169TED2, C8C069, P55316, P19338, B2R8X4, M0QXF7, A0A087X1F5, B4DU18, I3L425, A0A024RC87, A5YM53, A4D1Z4, Q96EB6, B4E335, H0Y465, Q03135, H6TXS1, Q86UE4, P32929, B4DL06, B2R6U9, B2WTI3, B7Z952, H3BSJ6, Q59GN8, P04626, P23…	0.0355615	0.255903	0.0181818
GO:0015297	antiporter activity	F	1	14	17	6210	0.0588235	0.00225443	over	Q9BYH2	Q69YM4, B4DHV9, P12236, Q01650, B3KXW8, B2RAH2, Q9BYH2, I3L1P8, Q86VL8, Q96T83, B4DPL8, F5GZS6, Q92536, Q5Y190	0.0376895	0.266001	0.0714286
GO:0008406	gonad development	P	1	14	17	6210	0.0588235	0.00225443	over	B4DUP5	P49770, B4DK69, Q96NB3, O75534, Q8IZ22, B4DI77, P17516, P55316, B4DUP5, Q9UI10, B4DZ85, Q13144, A0A0A0MSS8, P43246	0.0376895	0.266001	0.0714286
GO:0008283	cell proliferation	P	4	490	17	6210	0.235294	0.078905	over	A0A1B0GVI7, Q5JSB5, G3V1D1, Q05BX6	Q9H7S9, Q9Y266, O14672, A0A0A0MSQ3, B2R7U4, Q5JR08, O60566, H3BT57, F8VYH9, Q9HBH1, Q53S54, Q9ULW0, B3KM81, P07996, Q92974, E7EMW7, B4DL02, P27487, B4E0W3, C8C069, E9PGT3, P16104, A0A0C4DFT3, B2R8X4, P14174, A8K6Y1, Q05BX6, P67936, Q96EB6, Q2MJK0, P10809, Q9UKV8, A0A024RB10, Q12846, Q06124, B2RBL9, P15104, B7ZKY2, Q9P119, B3KUJ5, Q9UJU1, O14686, B4DL06, A0A0A0MSS8, B2R6U9, B7Z9U0, Q59GN8, F5H2U8,…	0.0399171	0.26911	0.00816327
GO:1903825	organic acid transmembrane transport	P	1	15	17	6210	0.0588235	0.00241546	over	Q9BYH2	Q8NCD8, Q96RG4, Q15758, P31749, M0R106, Q01650, P31751, A8K6H9, Q9BYH2, H0YF42, B2R7N6, B2R728, Q9HBR0, Q92536, P07996	0.0403298	0.26911	0.0666667
GO:0045137	development of primary sexual characteristics	P	1	15	17	6210	0.0588235	0.00241546	over	B4DUP5	P49770, B4DK69, Q96NB3, O75534, Q8IZ22, B4DI77, P17516, P55316, B4DUP5, Q9UI10, B4DZ85, Q13144, P43246, A0A0A0MSS8, Q9HC52	0.0403298	0.26911	0.0666667
GO:1905039	carboxylic acid transmembrane transport	P	1	15	17	6210	0.0588235	0.00241546	over	Q9BYH2	Q8NCD8, Q96RG4, Q15758, P31749, M0R106, Q01650, P31751, A8K6H9, Q9BYH2, H0YF42, B2R7N6, B2R728, Q9HBR0, Q92536, P07996	0.0403298	0.26911	0.0666667
GO:0006029	proteoglycan metabolic process	P	1	15	17	6210	0.0588235	0.00241546	over	Q4G148	I3NI22, Q86X52, Q8IZ52, Q6NUL1, Q4G148, Q499Z2, P35052, Q9BVJ8, Q8NCH0, Q9H2A9, Q9H1B5, K7EN15, G3V150, B4DL06, P07686	0.0403298	0.26911	0.0666667
GO:0008514	organic anion transmembrane transporter activity	F	1	15	17	6210	0.0588235	0.00241546	over	Q9BYH2	Q9Y6R1, B3KMV8, Q53GR7, M0R106, D6RIZ4, D3DTY0, P53007, Q9BYH2, I3L1P8, C9JZL5, B4E106, E9PJH7, B5M450, O15427, Q5Y190	0.0403298	0.26911	0.0666667
GO:0006879	cellular iron ion homeostasis	P	1	16	17	6210	0.0588235	0.00257649	over	G3V1D1	Q9BT67, B2RB38, B4E1V0, B7Z8Q4, P53384, G3V1D1, D6RE86, H0Y953, A0A0A6YY96, B2R7U4, H7C5E8, P30519, P02786, C9JAX1, C9J0K6, P21399	0.0429633	0.279071	0.0625
GO:0006835	dicarboxylic acid transport	P	1	16	17	6210	0.0588235	0.00257649	over	Q9BYH2	B4DLN1, A0A1B0GW76, Q13136, B3KMV8, Q53GR7, Q15758, B3KM58, M0R106, A8K6H9, J3QRU4, Q9BYH2, Q9UBX3, E9PJH7, B2R7N6, A8K132, Q5Y190	0.0429633	0.279071	0.0625
GO:0015807	L-amino acid transport	P	1	16	17	6210	0.0588235	0.00257649	over	Q9BYH2	Q8NCD8, B3KMV8, Q53GR7, Q15758, M0R106, A0A0A0MTB0, Q9NRX5, Q01650, A8K6H9, Q9BYH2, H0YF42, E9PJH7, B2R7N6, B2R728, Q92536, B4DHI5	0.0429633	0.279071	0.0625
GO:0005852	eukaryotic translation initiation factor 3 complex	C	1	17	17	6210	0.0588235	0.00273752	over	K7ER90	B4DMT5, O15371, O15372, Q13347, J9R021, O75822, Q92905, A0A0D9SFB3, K7EL20, K7ER90, Q6IAM0, B4DVQ5, Q7L2H7, Q9Y262, B4DV79, Q9UBQ5, P60228	0.04559	0.293535	0.0588235
GO:0006865	amino acid transport	P	1	18	17	6210	0.0588235	0.00289855	over	Q9BYH2	Q8NCD8, B3KMV8, Q53GR7, Q15758, M0R106, Q01650, A8K6H9, B2R921, Q9BYH2, H0YF42, E9PJH7, F5GZS6, B2R7N6, Q59GD7, B4DFF2, B2R728, Q9HBR0, Q92536	0.0482098	0.294884	0.0555556
GO:0010001	glial cell differentiation	P	1	18	17	6210	0.0588235	0.00289855	over	B4DUP5	P49770, H0Y5N4, B4DPP0, Q8N959, Q9NR50, H0Y465, C8C069, B4DDT3, Q8IWL5, H0YAN8, B4DUP5, Q00535, Q00534, A0A024QZP7, Q9UI10, B7Z6Y2, Q13144, Q14232	0.0482098	0.294884	0.0555556
GO:0001654	eye development	P	1	18	17	6210	0.0588235	0.00289855	over	Q16678	Q6SYC2, Q6IEH8, A1X283, Q16678, Q15648, B9A012, H0YKF9, O96019, Q53SF4, O75197, Q9HCK8, P51532, Q6QNY0, P55316, O43819, Q15042, P47895, P29317	0.0482098	0.294884	0.0555556
GO:0034308	primary alcohol metabolic process	P	1	18	17	6210	0.0588235	0.00289855	over	Q16678	B4DK69, O75911, Q8TC12, Q16678, P30837, H0YKF9, Q8IZV5, P11766, P17516, P51648, C9IZF6, O60218, P05091, P15121, P30838, P47895, A0A0A0MSS8, P00352	0.0482098	0.294884	0.0555556
GO:1900740	positive regulation of protein insertion into mitochondrial membrane involved in apoptotic signaling pathway	P	1	18	17	6210	0.0588235	0.00289855	over	Q5JSB5	Q5F2F8, P31946, O43521, Q5JSB5, P31947, B3KN04, Q86YQ0, Q96HI4, P63167, P61981, Q96FJ2, B5BUB8, P63104, P27348, Q9BXH1, P62258, B1PL87, Q04917	0.0482098	0.294884	0.0555556
GO:1900739	regulation of protein insertion into mitochondrial membrane involved in apoptotic signaling pathway	P	1	18	17	6210	0.0588235	0.00289855	over	Q5JSB5	Q5F2F8, P31946, O43521, Q5JSB5, P31947, B3KN04, Q86YQ0, Q96HI4, P63167, P61981, Q96FJ2, B5BUB8, P63104, P27348, Q9BXH1, P62258, B1PL87, Q04917	0.0482098	0.294884	0.0555556
GO:0055072	iron ion homeostasis	P	1	19	17	6210	0.0588235	0.00305958	over	G3V1D1	Q9BT67, H0YLF3, B2RB38, B4E1V0, A0A024R610, B7Z8Q4, P53384, A0A024R5L7, G3V1D1, D6RE86, H0Y953, A0A0A6YY96, B2R7U4, H7C5E8, P30519, P02786, C9JAX1, C9J0K6, P21399	0.050823	0.300839	0.0526316
GO:0001844	protein insertion into mitochondrial membrane involved in apoptotic signaling pathway	P	1	19	17	6210	0.0588235	0.00305958	over	Q5JSB5	Q5F2F8, P31946, O43521, Q5JSB5, P31947, B3KN04, Q86YQ0, Q96HI4, P63167, P61981, Q96FJ2, B5BUB8, Q07812, P63104, P27348, Q9BXH1, P62258, B1PL87, Q04917	0.050823	0.300839	0.0526316
GO:0016266	O-glycan processing	P	1	19	17	6210	0.0588235	0.00305958	over	Q4G148	Q05BM8, A0A0A0MTD6, Q7Z7M9, Q4G148, B4DL56, Q9H488, B3KQT5, F8VUJ3, Q96EU7, Q9NS00, Q9H3R2, B7Z5C5, D3DQI7, A5YRV2, Q86SF2, B2R8J0, Q58A70, B2R758, Q10471	0.050823	0.300839	0.0526316
GO:0051204	protein insertion into mitochondrial membrane	P	1	19	17	6210	0.0588235	0.00305958	over	Q5JSB5	Q5F2F8, P31946, O43521, Q5JSB5, P31947, B3KN04, Q86YQ0, Q96HI4, P63167, P61981, Q96FJ2, B5BUB8, Q07812, P63104, P27348, Q9BXH1, P62258, B1PL87, Q04917	0.050823	0.300839	0.0526316
GO:1901030	positive regulation of mitochondrial outer membrane permeabilization involved in apoptotic signaling pathway	P	1	20	17	6210	0.0588235	0.00322061	over	Q5JSB5	Q5F2F8, P31946, O43521, Q5JSB5, P31947, B3KN04, Q86YQ0, Q96HI4, P63167, P61981, Q96FJ2, B5BUB8, B3KRK7, Q07812, P63104, P27348, Q9BXH1, P62258, B1PL87, Q04917	0.0534293	0.308796	0.05
GO:0015171	amino acid transmembrane transporter activity	F	1	20	17	6210	0.0588235	0.00322061	over	Q9BYH2	Q8NCD8, B3KMV8, Q53GR7, Q15758, M0R106, A0A0A0MTB0, Q9NRX5, Q01650, A8K6H9, B2R921, Q9BYH2, H0YF42, E9PJH7, F5GZS6, B2R7N6, Q59GD7, B2R728, Q92536, Q9HBR0, B4DHI5	0.0534293	0.308796	0.05
GO:0042113	B cell activation	P	1	20	17	6210	0.0588235	0.00322061	over	A0A1B0GVI7	P05556, K7ENH8, A6MUU8, B7Z8I2, P52701, S6FRS6, P17812, A0A1B0GVI7, P60033, P14174, B3KRK7, Q07812, B9VP24, K9J972, A5Y5A3, P43246, P05771, P10809, Q9NRF8, B7Z532	0.0534293	0.308796	0.05
GO:0007601	visual perception	P	1	22	17	6210	0.0588235	0.00354267	over	Q16678	O75911, Q16678, O95834, B2R6F5, B4E1U1, B9A012, Q59EH0, Q8IZV5, B3KP24, O76024, Q08257, Q5T4U8, P51884, O43924, B4DRL9, B1APR7, Q02846, P04181, E5KLM1, Q92696, P08754, Q96DA6	0.0586219	0.330988	0.0454545
GO:0001676	long-chain fatty acid metabolic process	P	1	22	17	6210	0.0588235	0.00354267	over	Q16678	Q8N3P5, A0A0A0MTI6, A0A087X0W7, Q16678, O00519, B4E0R0, P50416, B3KNH1, A0A024QZX9, F5H8G5, Q9ULC5, P09110, P16152, B2R761, A0A024R8L7, Q15185, O14975, A0A0A0MSS8, E7EMT5, B2R659, A8K2S1, Q502X7	0.0586219	0.330988	0.0454545
GO:1903409	reactive oxygen species biosynthetic process	P	1	22	17	6210	0.0588235	0.00354267	over	Q16678	O43474, Q2QL34, H0Y7N1, P07900, Q92538, Q16678, P31749, P15559, P31751, Q9BV61, O94760, Q8IWL5, O75052, P35270, H0YNX7, B4DT46, E7BSV0, Q5T6L6, Q9BSK2, P08238, H3BN55, P00441	0.0586219	0.330988	0.0454545
GO:0050953	sensory perception of light stimulus	P	1	23	17	6210	0.0588235	0.0037037	over	Q16678	O75911, Q16678, O95834, B2R6F5, B4E1U1, B9A012, Q59EH0, Q8IZV5, B3KP24, O76024, Q08257, A0A0S2Z4V1, Q5T4U8, P51884, O43924, B4DRL9, B1APR7, Q02846, P04181, E5KLM1, Q92696, P08754, Q96DA6	0.0612081	0.342952	0.0434783
GO:0016763	transferase activity, transferring pentosyl groups	F	1	24	17	6210	0.0588235	0.00386473	over	Q4G148	P00491, P00492, H3BQB1, P43490, Q16831, Q9UKK3, O43598, B2RAR3, Q4G148, Q06203, B3KP69, Q9NXA8, B7Z5L6, Q460N5, Q9H974, Q7Z2W4, B5LY71, G3V167, Q9H1B5, Q8NBI6, Q6XQN6, B7Z5U1, P09874, Q96EB6	0.0637876	0.352031	0.0416667
GO:0051205	protein insertion into membrane	P	1	24	17	6210	0.0588235	0.00386473	over	Q5JSB5	Q5F2F8, P31946, O43521, Q5JSB5, P31947, B3KN04, P11441, A0A024R847, Q86YQ0, Q96HI4, P63167, A0A024RCR6, P61981, Q96FJ2, B5BUB8, Q07812, E7BSV0, P63104, P27348, Q9BXH1, E7EVY0, P62258, B1PL87, Q04917	0.0637876	0.352031	0.0416667
GO:0051325	interphase	P	1	25	17	6210	0.0588235	0.00402576	over	Q5JSB5	Q8WVM7, Q5JSB5, A0A024RB10, B0AZQ4, Q5T179, B2RTX8, Q9UH60, Q00534, F8VYH9, Q8N3U4, Q9NTI5, P62979, B4DHK6, D6RHI7, Q16254, B3KMN2, A0A0C4DGX4, O60216, B4DTN0, P62987, Q14683, Q96FF9, Q2MJK0, Q29RF7, Q6AI02	0.0663604	0.353871	0.04
GO:0051329	mitotic interphase	P	1	25	17	6210	0.0588235	0.00402576	over	Q5JSB5	Q8WVM7, Q5JSB5, A0A024RB10, B0AZQ4, Q5T179, B2RTX8, Q9UH60, Q00534, F8VYH9, Q8N3U4, Q9NTI5, P62979, B4DHK6, D6RHI7, Q16254, B3KMN2, A0A0C4DGX4, O60216, B4DTN0, P62987, Q14683, Q96FF9, Q2MJK0, Q29RF7, Q6AI02	0.0663604	0.353871	0.04
GO:0006826	iron ion transport	P	1	25	17	6210	0.0588235	0.00402576	over	G3V1D1	Q658P3, H0YLF3, Q8IWU2, Q16864, O75348, B4E1V0, P50570, A0A024R5L7, P36543, G3V1D1, P38606, P08582, H7C5E8, Q00610, P27449, P02786, B2R7M1, B3KR70, B5MC02, P21283, P21281, Q53ET5, A0A0A6YY96, G3V2S6, G3V126	0.0663604	0.353871	0.04
GO:0007548	sex differentiation	P	1	25	17	6210	0.0588235	0.00402576	over	B4DUP5	B2RE59, Q6IEH8, Q8IZ22, Q06124, B4DI77, B4DZ85, Q13144, A0A0A0MSS8, Q9HC52, G3V5A9, Q96DA6, P49770, B4DK69, Q96NB3, O75534, P17516, Q9HCK8, P55316, B4DUP5, B3KRK7, Q9BXB1, Q07812, Q9UI10, Q16344, P43246	0.0663604	0.353871	0.04
GO:0043087	regulation of GTPase activity	P	2	156	17	6210	0.117647	0.0251208	over	B4DUP5, B4DWS8	O95714, P18085, M0QZS0, A0A024RAV5, Q5VV41, F2Z2E2, A1L390, Q68E09, Q59E87, K7EN45, D6R938, H0YFI1, B7ZVX0, A8MQ02, P46940, B2RDW0, P01111, P49770, B4DL02, P60903, X5D7Q2, Q59EH0, Q5T123, P51636, Q5JVZ8, Q53TG4, Q01082, B4DGW2, Q9ULG6, B0AZR9, B4DE20, B7Z4F4, H0YAN8, P84095, Q9UI10, A0PJ44, E5RIH3, X5DR54, H7C2S1, Q9Y2Q5, C9J1Z8, O15020, F8W9Y7, Q13813, O94887, H0Y465, Q8TC07, Q96M96, P52735, B4D…	0.0666489	0.353871	0.0128205
GO:0006366	transcription from RNA polymerase II promoter	P	4	580	17	6210	0.235294	0.0933977	over	B4DXI2, A0A1B0GVI7, Q5JSB5, Q96AE4	Q92618, P67809, B2RAH5, O00268, A5YKK6, B2RAH2, O00148, H9KV93, E7ETD6, B3KRB0, Q68E01, Q9ULW3, A8K2R3, B3KRB7, H0YN81, B3KM81, B2R506, Q92974, A0A024R669, Q3SY98, B4DVD6, Q05048, C8C069, E9PGT3, G5E9W3, F8VZJ2, B2RAI2, Q5JTV1, O60216, P62487, Q96EB1, A0A0C4DFT3, B2R8X4, A0A087WXN4, H0UI99, Q92841, Q2VIN3, Q6NX55, C9J7T7, J3QR41, Q96EB6, Q9ULX6, O15525, Q12962, B4E0X8, Q9UK58, A8K103, Q9UKV8, A8M…	0.0672289	0.353871	0.00689655
GO:0010468	regulation of gene expression	P	7	1403	17	6210	0.411765	0.225926	over	B4DXI2, K7ER90, B4DUP5, A0A1B0GVI7, Q16678, Q5JSB5, Q96AE4	F2Z2V0, B2RAH5, Q9NQU5, Q9BRZ2, O00148, B2RAH2, Q68E09, Q5JR08, H3BV98, E7ETD6, H3BT57, Q92973, A8K2R3, B3KRB7, H0YN81, B2R506, Q92974, A0A024R669, Q9BQ69, A8K4T6, D6RBL4, Q9H4L7, A0A024R5U7, H0Y6H0, Q5VTR2, S4R3H4, C8C069, Q8NDV7, E9PGT3, B2RAI2, F8VZJ2, P0CJ79, B3KY11, E9PGT1, P51116, O60216, P62487, Q96EB1, A0A0C4DFT3, B2R8X4, Q99598, P14174, Q8WXA9, A2A2V2, Q2VIN3, Q6NX55, A8K6Y1, A0A0A8K8C0,…	0.0674958	0.353871	0.00498931
GO:0070069	cytochrome complex	C	1	27	17	6210	0.0588235	0.00434783	over	Q9UDW1	P31930, P09669, A0A059QFD5, Q7KZN9, E5DZN4, O00483, P14854, Q59F44, Q9UDW1, P13073, O14949, H7C492, P24311, D6R9Z7, A0A097Q0T5, P20674, Q567R0, P10606, P14927, A0A0S2Z523, P14406, A0A059RS35, B4DEY8, Q5JTJ3, E5E079, H9T3W9, P47985	0.0714862	0.36153	0.037037
GO:0006413	translational initiation	P	2	164	17	6210	0.117647	0.026409	over	K7ER90, B4DUP5	J9R021, P23396, C9K025, O75822, P62917, P62081, P18124, B4DDX2, Q9UBS0, P62750, A0A087WXM6, P46783, I3L3P7, H3BN98, B4DT65, P62753, O15371, C9J185, P49770, E7ETK0, O15372, B7ZKK7, H0YME5, E7EUU4, P46781, P36578, Q53TG4, P41091, K7EJT5, P63173, P12270, P62241, Q9UI10, P62888, P61313, P20042, P60228, P60866, P46779, P46778, B4DMT5, P52298, P25398, Q9UKV8, Q8NI62, Q96IR1, P62891, H0YEQ8, K7EL20, P40…	0.0727528	0.36153	0.0121951
GO:1901990	regulation of mitotic cell cycle phase transition	P	2	165	17	6210	0.117647	0.02657	over	B4DXI2, Q5JSB5	I3L4A2, O43670, Q6P1J9, Q5JSB5, Q96K76, A0A0A0MQU3, J3QLB5, O43715, A5YKK6, Q6FHU0, O60566, Q9Y6G9, P62195, Q9UH60, F8VYH9, Q53S54, Q9C0C2, A8K4T6, P78536, A0A0S2Z3I0, Q12834, P33981, Q7Z5X8, B4DL80, B7Z6J7, B2R7E8, B7Z5H7, B4DUJ0, P12270, Q05D30, Q09472, Q13257, H6WA46, A8MX75, B3KN47, Q9UN37, A0A024RB10, Q9NQW6, P35998, K7EIU4, Q9P119, A8K4G7, B4DXI2, Q00534, P25789, P25788, Q16531, P40306, P61…	0.0735286	0.36153	0.0121212
GO:0006690	icosanoid metabolic process	P	1	28	17	6210	0.0588235	0.00450886	over	Q16678	Q9Y2Y8, A6MUU8, Q9BTZ2, A0A024QZX9, I3L4X2, A0A087WUQ6, F5H8G5, A0A024R8L7, Q9NZQ5, Q15185, P49137, A0A0A0MSS8, O75828, B4DK69, Q8N3P5, Q16678, O00519, P17516, Q8N8N7, P14174, P16152, P09960, B5MCK8, A0A024R172, E7EMT5, Q99735, K7ERP4, A8K2S1	0.0740391	0.36153	0.0357143
GO:0020037	heme binding	F	1	28	17	6210	0.0588235	0.00450886	over	Q16678	A0A0K2BMD8, B7UCU6, P12931, Q59F44, Q5HYD9, Q53GY5, B2R7U4, H3BP32, B2R7W7, B4DUI1, P04040, Q96SQ9, B4DT46, B3VL17, Q96T46, B7Z6W5, Q8N3P5, U6FM64, Q8TBT6, Q16678, U3PXP0, B7Z8R6, C9JFR7, H0YB13, B3KRC6, B2RA70, Q53RS5, E7EMT5	0.0740391	0.36153	0.0357143
GO:0046906	tetrapyrrole binding	F	1	29	17	6210	0.0588235	0.00466989	over	Q16678	A0A0K2BMD8, B7UCU6, P12931, Q59F44, Q5HYD9, Q53GY5, B2R7U4, H3BP32, B2R7W7, B4DUI1, P04040, Q96SQ9, B4DT46, B3VL17, B2R6K1, Q96T46, B7Z6W5, Q8N3P5, U6FM64, Q8TBT6, Q16678, U3PXP0, B7Z8R6, C9JFR7, H0YB13, B3KRC6, B2RA70, Q53RS5, E7EMT5	0.0765854	0.36153	0.0344828
GO:1903510	mucopolysaccharide metabolic process	P	1	29	17	6210	0.0588235	0.00466989	over	Q4G148	B4DTT0, B4DEN5, B7Z5S9, Q499Z2, P51884, B2RAH2, C9JZL5, Q8NCH0, Q00610, Q9H1B5, G3V150, Q86X52, B3KM35, Q8IZ52, Q4G148, B3KQT5, B4DLB8, Q5T985, O75330, O95782, B4DTH9, Q9BVJ8, P16278, P19838, H0Y9B6, Q8WUJ3, P07686, G3XAD2, H0YD13	0.0765854	0.36153	0.0344828
GO:1901987	regulation of cell cycle phase transition	P	2	171	17	6210	0.117647	0.0275362	over	B4DXI2, Q5JSB5	I3L4A2, O43670, Q6P1J9, Q5JSB5, Q96K76, A0A0A0MQU3, J3QLB5, O43715, A5YKK6, Q6FHU0, O60566, Q9Y6G9, P62195, Q9UH60, F8VYH9, Q53S54, Q9C0C2, A8K4T6, P78536, A0A0S2Z3I0, Q12834, P33981, Q7Z5X8, B7Z6J7, B2R7E8, B4DL80, B7Z5H7, B4DUJ0, P12270, Q05D30, Q09472, Q13257, A0A024R4V8, A8MX75, H6WA46, B3KN47, Q9UN37, A0A024RB10, O75367, Q9NQW6, P35998, K7EIU4, Q9P119, B4DXI2, A8K4G7, Q00534, P25789, Q16531,…	0.0782416	0.36153	0.0116959
GO:0032944	regulation of mononuclear cell proliferation	P	1	30	17	6210	0.0588235	0.00483092	over	A0A1B0GVI7	P09429, P00491, H3BLV0, K7ENH8, Q86TY5, P15529, H7BYW5, A6MUU8, B7ZMB3, A0A0S4XQV4, F6IR49, Q05209, Q5U071, A0A1B0GVI7, P60033, P04083, R4GN18, C9JAB9, U5YKD2, B4DK26, P10747, Q53TG4, B4DJ85, A0A024R3E0, P10644, E7ES08, A0A090MEX8, P14174, K7EPR5, Q16466	0.0791251	0.36153	0.0333333
GO:0050670	regulation of lymphocyte proliferation	P	1	30	17	6210	0.0588235	0.00483092	over	A0A1B0GVI7	P09429, P00491, H3BLV0, K7ENH8, Q86TY5, P15529, H7BYW5, A6MUU8, B7ZMB3, A0A0S4XQV4, F6IR49, Q05209, Q5U071, A0A1B0GVI7, P60033, P04083, R4GN18, C9JAB9, U5YKD2, B4DK26, P10747, Q53TG4, B4DJ85, A0A024R3E0, P10644, E7ES08, A0A090MEX8, P14174, K7EPR5, Q16466	0.0791251	0.36153	0.0333333
GO:0005342	organic acid transmembrane transporter activity	F	1	30	17	6210	0.0588235	0.00483092	over	Q9BYH2	B4DLN1, Q8NCD8, Q15758, M0R106, A0A0A0MTB0, Q01650, D3DTY0, R4GMX5, P53007, B2R921, I3L1P8, B4DY23, B4E106, H0YF42, F5GZS6, Q59GD7, B2R728, Q92536, Q9HBR0, B4DHI5, B3KMV8, Q53GR7, Q9NRX5, P17516, A8K6H9, Q9BYH2, Q9UBX3, E9PJH7, B2R7N6, O15427	0.0791251	0.36153	0.0333333
GO:0046943	carboxylic acid transmembrane transporter activity	F	1	30	17	6210	0.0588235	0.00483092	over	Q9BYH2	B4DLN1, Q8NCD8, Q15758, M0R106, A0A0A0MTB0, Q01650, D3DTY0, R4GMX5, P53007, B2R921, I3L1P8, B4DY23, B4E106, H0YF42, F5GZS6, Q59GD7, B2R728, Q92536, Q9HBR0, B4DHI5, B3KMV8, Q53GR7, Q9NRX5, P17516, A8K6H9, Q9BYH2, Q9UBX3, E9PJH7, B2R7N6, O15427	0.0791251	0.36153	0.0333333
GO:0022414	reproductive process	P	2	175	17	6210	0.117647	0.0281804	over	B4DUP5, A0A1B0GVI7	B4DPP0, F8VYY9, Q49AE1, A6NML8, B5BTZ6, Q53SF4, A0A024RAV4, J3QLB5, P42345, P63167, Q8TAF3, E7ETD6, P17275, Q9BUG9, P43034, P22694, A0A0S2Z5K8, H7C212, H7C0V9, Q96DA6, B4DYY5, Q96HA1, P49770, H0Y5N4, B4DK69, Q8WWH8, Q4G0I1, A0A0D9SG71, Q96CW5, K7EKE8, O75534, X5DRF3, P55316, O60216, A4LAA3, B3KSM6, B3KRK7, Q9UI10, Q8N2Z9, J3QR41, A8K3S1, P07602, Q13895, B4DEL2, O75525, A0A024RB10, B0AZQ4, Q06124,…	0.0814375	0.36153	0.0114286
GO:0072359	circulatory system development	P	2	175	17	6210	0.117647	0.0281804	over	A0A1B0GVI7, Q16678	P36507, B4DLX6, P19174, A8K3K1, Q9UEH5, P12259, Q53SF4, Q96BN8, P52799, Q9NS00, P42345, Q562L9, P42224, B2R7U4, Q5JR08, Q8NEP3, H3BT57, P17275, Q9BUG9, Q562T9, A0A0S2Z4I4, P07355, P07996, H0Y5N4, B4DL02, C9J185, Q9UII2, P12429, A0A169TED2, P10644, C8C069, A0A024R2G1, F8VZJ2, P19105, P55316, P19338, B2R8X4, M0QXF7, A0A087X1F5, K7ENT6, B4DU18, I3L425, A0A024RC87, A5YM53, A4D1Z4, P67936, Q96EB6, B4E…	0.0814375	0.36153	0.0114286
GO:0046916	cellular transition metal ion homeostasis	P	1	31	17	6210	0.0588235	0.00499195	over	G3V1D1	C9J1Z8, P04732, B2RB38, B4E1V0, Q8NEW0, B7Z8Q4, P18085, P53384, Q9Y6M5, G3V1D1, O00244, D6RE86, Q59G44, O43819, B2R7U4, A0A0S2Z5C8, H7C5E8, P61204, P02786, C9J0K6, Q9BT67, H0Y953, B4DPB6, A0A0S2Z3Y4, A0A0A6YY96, O14617, P30519, C9JAX1, B4DQ79, P02795, P21399	0.0816583	0.36153	0.0322581
GO:0042063	gliogenesis	P	1	31	17	6210	0.0588235	0.00499195	over	B4DUP5	P07942, B4DPP0, F6R503, H0Y465, B4DDT3, B3KUN5, A0A024R1D9, Q00535, Q00534, F8VYH9, A0A024QZP7, B7Z6Y2, Q9UJU1, Q13144, G5EA48, Q14232, Q9UPY3, Q9UK20, H0Y5N4, P49770, Q8N959, Q9NR50, E5RGN0, C8C069, Q8IWL5, H0YAN8, Q5VZB4, B4DUP5, Q9UI10, B2RCZ4, Q5SZE1	0.0816583	0.36153	0.0322581
GO:0015849	organic acid transport	P	1	31	17	6210	0.0588235	0.00499195	over	Q9BYH2	Q8NCD8, Q96RG4, Q15758, M0R106, B4E0R0, B3KN05, Q01650, P31751, D3DTY0, B2R921, H0YF42, F5GZS6, B7Z3U1, B4DUQ5, Q59GD7, B2R728, Q9HBR0, Q92536, P07996, B3KMV8, Q53GR7, P31749, P17516, B3KNH1, F6KPG5, A8K6H9, Q9BYH2, E9PJH7, B2R7N6, B4DFF2, O14975	0.0816583	0.36153	0.0322581
GO:2000112	regulation of cellular macromolecule biosynthetic process	P	6	1166	17	6210	0.352941	0.187762	over	B4DXI2, K7ER90, B4DUP5, A0A1B0GVI7, Q5JSB5, Q96AE4	B2RAH5, Q9NQU5, Q9BRZ2, O00148, B2RAH2, Q68E09, Q8TDD1, H3BV98, H3BT57, E7ETD6, Q8N3U4, A8K2R3, B3KRB7, H0YN81, B2R506, Q92974, A0A024R669, B4DL02, D6RBL4, Q9H4L7, H0Y6H0, Q5VTR2, C8C069, Q8NDV7, E9PGT3, B2RAI2, F8VZJ2, P0CJ79, B3KY11, P51116, O60216, Q96EB1, A0A0C4DFT3, B2R8X4, Q2VIN3, Q6NX55, A8K6Y1, A0A0A8K8C0, J3QR41, O15405, Q96EB6, B4DMT5, A8K103, Q9UKV8, F5H136, B4DMT1, A0A024R5X6, H6TXS1,…	0.0821634	0.36153	0.0051458
GO:0000003	reproduction	P	2	176	17	6210	0.117647	0.0283414	over	A0A1B0GVI7, B4DUP5	B4DPP0, F8VYY9, Q49AE1, B5BTZ6, A6NML8, Q53SF4, A0A024RAV4, J3QLB5, P42345, P63167, Q8TAF3, E7ETD6, P17275, Q9BUG9, P43034, P22694, A0A0S2Z5K8, H7C212, H7C0V9, Q96DA6, B4DYY5, Q96HA1, P49770, H0Y5N4, B4DK69, Q8WWH8, Q4G0I1, A0A0D9SG71, Q96CW5, K7EKE8, O75534, X5DRF3, P55316, O60216, A4LAA3, B3KSM6, B3KRK7, Q9UI10, Q8N2Z9, J3QR41, A8K3S1, P07602, Q13895, B4DEL2, O75525, A0A024RB10, B0AZQ4, Q06124,…	0.082243	0.36153	0.0113636
GO:0061458	reproductive system development	P	1	32	17	6210	0.0588235	0.00515298	over	B4DUP5	P07602, Q6IEH8, Q8IZ22, P50238, Q06124, B4DI77, Q9BUG9, B4DZ85, Q13144, A0A0A0MSS8, G3V5A9, Q96DA6, P00441, P49770, B4DK69, H0Y5N4, Q59GN8, Q96NB3, O75534, P17516, Q9HCK8, P55316, Q99557, Q5RGS4, B4DUP5, B3KRK7, B4DVP5, Q9BXB1, Q07812, Q9UI10, Q16344, P43246	0.0841849	0.36153	0.03125
GO:0033559	unsaturated fatty acid metabolic process	P	1	32	17	6210	0.0588235	0.00515298	over	Q16678	O00767, Q9Y2Y8, B4E0R0, O15121, A6MUU8, Q9BTZ2, A0A024QZX9, I3L4X2, F5H8G5, A0A024R8L7, Q9NZQ5, Q15185, P49137, A0A0A0MSS8, O75828, Q502X7, B4DK69, Q8N3P5, A0A0A0MTI6, Q16678, O00519, G3V0I9, P17516, Q8N8N7, P14174, P16152, P09960, B5MCK8, A0A024R172, E7EMT5, Q99735, A8K2S1	0.0841849	0.36153	0.03125
GO:0006024	glycosaminoglycan biosynthetic process	P	1	32	17	6210	0.0588235	0.00515298	over	Q4G148	B7Z5S9, B4DEN5, Q7Z7M9, O75487, Q499Z2, P51884, P31431, P15104, O60701, C9JZL5, Q8NCH0, Q00610, Q9H1B5, G3V150, Q86X52, B3KM35, A0A024RAB6, Q8IZ52, Q4G148, Q6NUL1, B3KQT5, B3KN15, B4DLB8, O95782, A0A087X208, P35052, Q9BVJ8, B2R6Z9, P19838, P18827, Q8WUJ3, G3XAD2	0.0841849	0.36153	0.03125
GO:0001523	retinoid metabolic process	P	1	32	17	6210	0.0588235	0.00515298	over	Q16678	Q5SRP5, P49189, H0YKF9, O75487, H0YHN9, P11766, P31431, Q5SYZ4, A0A0S2Z3V0, P05091, P47895, A0A0A0MSS8, B4DK69, O75911, Q8TC12, P29762, A0A024RAB6, Q16678, P30837, Q8IZV5, P06727, P17516, C9IZF6, E1A689, O60218, A0A087X208, P35052, P18827, P02656, P00352, F8W696, E9PP15	0.0841849	0.36153	0.03125
GO:0048608	reproductive structure development	P	1	32	17	6210	0.0588235	0.00515298	over	B4DUP5	P07602, Q6IEH8, Q8IZ22, P50238, Q06124, B4DI77, Q9BUG9, B4DZ85, Q13144, A0A0A0MSS8, G3V5A9, Q96DA6, P00441, P49770, B4DK69, H0Y5N4, Q59GN8, Q96NB3, O75534, P17516, Q9HCK8, P55316, Q99557, Q5RGS4, B4DUP5, B4DVP5, B3KRK7, Q9BXB1, Q07812, Q9UI10, Q16344, P43246	0.0841849	0.36153	0.03125
GO:0006023	aminoglycan biosynthetic process	P	1	32	17	6210	0.0588235	0.00515298	over	Q4G148	B7Z5S9, B4DEN5, Q7Z7M9, O75487, Q499Z2, P51884, P31431, P15104, O60701, C9JZL5, Q8NCH0, Q00610, Q9H1B5, G3V150, Q86X52, B3KM35, A0A024RAB6, Q8IZ52, Q4G148, Q6NUL1, B3KQT5, B3KN15, B4DLB8, O95782, A0A087X208, P35052, Q9BVJ8, B2R6Z9, P19838, P18827, Q8WUJ3, G3XAD2	0.0841849	0.36153	0.03125
GO:0006493	protein O-linked glycosylation	P	1	32	17	6210	0.0588235	0.00515298	over	Q4G148	Q9H5K3, Q05BM8, Q9P2X0, A0A0A0MTD6, Q7Z7M9, B4DEN5, B4DL56, B3KP69, Q9H488, M0R1M1, O95394, Q9NS00, O60762, A0A024R2W4, Q58A70, P07996, Q10471, O15294, Q59GJ5, Q8NAT1, Q4G148, B3KQT5, F8VUJ3, Q96EU7, Q9H3R2, B7Z5C5, D3DQI7, A5YRV2, Q86SF2, B2R8J0, B2R758, H7C3W5	0.0841849	0.36153	0.03125
GO:0044212	transcription regulatory region DNA binding	F	2	180	17	6210	0.117647	0.0289855	over	B4DXI2, A0A1B0GVI7	P78545, Q92618, Q9UKL0, A8K3K1, P67809, P12814, M0R205, B5BTZ6, A0A024RAV4, Q9UBB5, I3L412, P42345, P42224, Q562L9, H0YG25, Q96T88, E5KSX8, Q5XKR4, P17275, Q2TAM5, Q9UGU0, Q562T9, H7C212, B4DUQ1, H0Y5N4, Q15545, F8VSL3, O96019, H0YLC5, Q96I24, B2RAI2, E7ES08, P55316, K7EIJ0, B2R8X4, H0UI99, Q2VIN3, B4DYZ9, O15405, B4E1P2, A4D1Z4, B4E335, O96028, Q09472, A8K103, Q9UKV8, A0A024R5X6, Q9NRY4, A8K9Y8,…	0.0854909	0.36153	0.0111111
GO:0006977	DNA damage response, signal transduction by p53 class mediator resulting in cell cycle arrest	P	1	33	17	6210	0.0588235	0.00531401	over	Q5JSB5	B2RE59, Q09472, P30307, Q5JSB5, P14635, O43715, A5YKK6, Q96L51, Q9UH60, A0A024QZP7, Q5QPD4, P62979, H0Y9C1, E9PKG1, Q9C0C2, B7Z9U0, Q16254, A0A0S2Z3I0, P06748, B3KM57, Q59EF0, Q86XZ2, P31947, P12004, Q86X55, B7Z6J7, Q9H9A5, A5YRV2, Q9UKZ1, Q07812, P62987, Q99856, F8VV52	0.0867049	0.36153	0.030303
GO:0070663	regulation of leukocyte proliferation	P	1	33	17	6210	0.0588235	0.00531401	over	A0A1B0GVI7	P09429, P00491, H3BLV0, K7ENH8, Q86TY5, H7BYW5, P15529, A6MUU8, B7ZMB3, P12931, A0A0S4XQV4, F6IR49, Q05209, Q5U071, A0A1B0GVI7, P60033, P04083, R4GN18, C9JAB9, U5YKD2, B4DK26, P10747, B4DJ85, Q53TG4, A0A024R3E0, P10644, E7ES08, A0A090MEX8, P14174, K7EPR5, Q16466, B4DQ79, B2RA70	0.0867049	0.36153	0.030303
GO:1901028	regulation of mitochondrial outer membrane permeabilization involved in apoptotic signaling pathway	P	1	33	17	6210	0.0588235	0.00531401	over	Q5JSB5	A8K787, P54652, P0DMV9, Q5JSB5, Q8N9M5, P12236, B3KN04, Q86YQ0, Q96HI4, P63167, P61981, B5BUB8, P63104, P27348, P62258, B1PL87, B4DS67, Q04917, Q5F2F8, Q2QL34, P31946, O43521, B2RB23, P31947, P34931, P11142, B3KSM6, B3KRK7, Q96FJ2, Q07812, B2R6X5, P05141, Q9BXH1	0.0867049	0.36153	0.030303
GO:0051341	regulation of oxidoreductase activity	P	1	33	17	6210	0.0588235	0.00531401	over	G3V1D1	Q13237, P07900, K7EPL5, P50570, Q8IVQ6, G3V1D1, Q03135, P31751, O94760, A0A0S2Z3V0, P16435, O00401, A2RQD7, V9HW35, A0A087X1K9, A8K670, E7BSV0, E7EVY0, B2RDW0, H0Y7N1, P31749, O75052, Q969G6, P35270, P19838, B3KNA1, H0YNX7, Q99497, J3QL41, C9JAX1, Q15554, Q9NVH6, B7ZKQ9	0.0867049	0.36153	0.030303
GO:0000975	regulatory region DNA binding	F	2	182	17	6210	0.117647	0.0293076	over	B4DXI2, A0A1B0GVI7	P78545, Q92618, Q9UKL0, A8K3K1, P67809, M0R205, P12814, B5BTZ6, A0A024RAV4, Q9UBB5, I3L412, P42345, P42224, Q562L9, H0YG25, Q96T88, E5KSX8, Q5XKR4, P17275, Q9UGU0, Q2TAM5, Q562T9, H7C212, B4DUQ1, H0Y5N4, Q15545, F8VSL3, H0YLC5, O96019, Q96I24, E7ES08, B2RAI2, P55316, K7EIJ0, B2R8X4, H0UI99, Q2VIN3, B4DYZ9, O15405, B4E1P2, A4D1Z4, B4E335, O96028, A8K103, Q09472, Q9UKV8, A0A024R5X6, A8K9Y8, Q9NRY4,…	0.08713	0.36153	0.010989
GO:0001067	regulatory region nucleic acid binding	F	2	182	17	6210	0.117647	0.0293076	over	B4DXI2, A0A1B0GVI7	P78545, Q92618, Q9UKL0, A8K3K1, P67809, M0R205, P12814, B5BTZ6, A0A024RAV4, Q9UBB5, I3L412, P42345, P42224, Q562L9, H0YG25, Q96T88, E5KSX8, Q5XKR4, P17275, Q9UGU0, Q2TAM5, Q562T9, H7C212, B4DUQ1, H0Y5N4, Q15545, F8VSL3, H0YLC5, O96019, Q96I24, E7ES08, B2RAI2, P55316, K7EIJ0, B2R8X4, H0UI99, Q2VIN3, B4DYZ9, O15405, B4E1P2, A4D1Z4, B4E335, O96028, A8K103, Q09472, Q9UKV8, A0A024R5X6, A8K9Y8, Q9NRY4,…	0.08713	0.36153	0.010989
GO:0015291	secondary active transmembrane transporter activity	F	1	34	17	6210	0.0588235	0.00547504	over	Q9BYH2	Q69YM4, A8K787, Q8NCD8, B4DHV9, Q15758, B3KVU0, M0R106, P12236, Q01650, Q8NE86, B3KXW8, B2RAH2, Q659F8, Q96T83, I3L1P8, F5GZS6, Q59GD7, Q92536, Q5Y190, Q9Y6R1, P55011, Q9Y2D2, Q6ICV6, H0YMQ9, A0A0G2JNW7, Q9BYH2, Q86VL8, Q8TAG3, B4DPL8, P05141, B2R7N6, B5M450, Q8N697, B4DFF2	0.0892184	0.36153	0.0294118
GO:0072431	signal transduction involved in mitotic G1 DNA damage checkpoint	P	1	34	17	6210	0.0588235	0.00547504	over	Q5JSB5	B2RE59, Q09472, P30307, Q5JSB5, P14635, P78527, O43715, A5YKK6, Q96L51, Q9UH60, A0A024QZP7, Q5QPD4, P62979, H0Y9C1, E9PKG1, Q9C0C2, B7Z9U0, Q16254, A0A0S2Z3I0, P06748, B3KM57, Q59EF0, Q86XZ2, P31947, P12004, Q86X55, B7Z6J7, Q9H9A5, A5YRV2, Q9UKZ1, Q07812, P62987, Q99856, F8VV52	0.0892184	0.36153	0.0294118
GO:1902400	intracellular signal transduction involved in G1 DNA damage checkpoint	P	1	34	17	6210	0.0588235	0.00547504	over	Q5JSB5	B2RE59, Q09472, P30307, Q5JSB5, P14635, P78527, O43715, A5YKK6, Q96L51, Q9UH60, A0A024QZP7, Q5QPD4, P62979, H0Y9C1, E9PKG1, Q9C0C2, B7Z9U0, Q16254, A0A0S2Z3I0, P06748, B3KM57, Q59EF0, Q86XZ2, P31947, P12004, Q86X55, B7Z6J7, Q9H9A5, A5YRV2, Q9UKZ1, Q07812, P62987, Q99856, F8VV52	0.0892184	0.36153	0.0294118
GO:0016101	diterpenoid metabolic process	P	1	34	17	6210	0.0588235	0.00547504	over	Q16678	Q5SRP5, P49189, H0YKF9, O75487, H0YHN9, P11766, P51648, P31431, Q5SYZ4, A0A0S2Z3V0, P05091, P47895, A0A0A0MSS8, B4DK69, O75911, Q8TC12, P29762, A0A024RAB6, Q16678, P30837, P06727, Q8IZV5, P17516, E1A689, C9IZF6, A0A087X208, O60218, P35052, P18827, P30838, P02656, F8W696, P00352, E9PP15	0.0892184	0.36153	0.0294118
GO:0032943	mononuclear cell proliferation	P	1	35	17	6210	0.0588235	0.00563607	over	A0A1B0GVI7	P09429, P00491, H3BLV0, K7ENH8, Q86TY5, H7BYW5, P15529, A6MUU8, B7ZMB3, A0A0S4XQV4, F6IR49, Q05209, Q5U071, A0A1B0GVI7, P60033, P04083, B9VP24, R4GN18, C9JAB9, U5YKD2, B4DK26, P10747, B4DJ85, Q53TG4, A0A024R3E0, P10644, E7ES08, A0A090MEX8, P17812, P14174, K7EPR5, Q16466, Q9NRF8, P10809, B7Z532	0.0917255	0.36153	0.0285714
GO:1902110	positive regulation of mitochondrial membrane permeability involved in apoptotic process	P	1	35	17	6210	0.0588235	0.00563607	over	Q5JSB5	A8K787, P54652, P0DMV9, Q5JSB5, Q8N9M5, P12236, B3KN04, Q86YQ0, Q96HI4, P63167, P61981, B5BUB8, H3BST5, P63104, P27348, P62258, B1PL87, B4DS67, Q04917, Q5F2F8, Q2QL34, H7BXZ6, P31946, O43521, B2RB23, P31947, P34931, P11142, B3KSM6, B3KRK7, Q96FJ2, Q07812, B2R6X5, P05141, Q9BXH1	0.0917255	0.36153	0.0285714
GO:1902402	signal transduction involved in mitotic DNA damage checkpoint	P	1	35	17	6210	0.0588235	0.00563607	over	Q5JSB5	B2RE59, Q09472, P30307, Q5JSB5, P14635, P78527, O43715, A5YKK6, Q96L51, Q9UH60, A0A024QZP7, Q5QPD4, P62979, H0Y9C1, E9PKG1, Q9C0C2, B7Z9U0, Q16254, A0A0S2Z3I0, P06748, B3KM57, Q59EF0, Q86XZ2, P31947, B3KP18, P12004, Q86X55, B7Z6J7, Q9H9A5, A5YRV2, Q9UKZ1, Q07812, P62987, Q99856, F8VV52	0.0917255	0.36153	0.0285714
GO:1902686	mitochondrial outer membrane permeabilization involved in programmed cell death	P	1	35	17	6210	0.0588235	0.00563607	over	Q5JSB5	A8K787, P54652, P0DMV9, Q5JSB5, Q8N9M5, P12236, B3KN04, Q86YQ0, Q96HI4, P63167, P61981, B5BUB8, H3BST5, P63104, P27348, P62258, B1PL87, B4DS67, Q04917, Q5F2F8, Q2QL34, H7BXZ6, P31946, O43521, B2RB23, P31947, P34931, P11142, B3KSM6, B3KRK7, Q96FJ2, Q07812, B2R6X5, P05141, Q9BXH1	0.0917255	0.36153	0.0285714
GO:0072413	signal transduction involved in mitotic cell cycle checkpoint	P	1	35	17	6210	0.0588235	0.00563607	over	Q5JSB5	B2RE59, Q09472, P30307, Q5JSB5, P14635, P78527, O43715, A5YKK6, Q96L51, Q9UH60, A0A024QZP7, Q5QPD4, P62979, H0Y9C1, E9PKG1, Q9C0C2, B7Z9U0, Q16254, A0A0S2Z3I0, P06748, B3KM57, Q59EF0, Q86XZ2, P31947, B3KP18, P12004, Q86X55, B7Z6J7, Q9H9A5, A5YRV2, Q9UKZ1, Q07812, P62987, Q99856, F8VV52	0.0917255	0.36153	0.0285714
GO:0046651	lymphocyte proliferation	P	1	35	17	6210	0.0588235	0.00563607	over	A0A1B0GVI7	P09429, P00491, H3BLV0, K7ENH8, Q86TY5, H7BYW5, P15529, A6MUU8, B7ZMB3, A0A0S4XQV4, F6IR49, Q05209, Q5U071, A0A1B0GVI7, P60033, P04083, B9VP24, R4GN18, C9JAB9, U5YKD2, B4DK26, P10747, B4DJ85, Q53TG4, A0A024R3E0, P10644, E7ES08, A0A090MEX8, P17812, P14174, K7EPR5, Q16466, Q9NRF8, P10809, B7Z532	0.0917255	0.36153	0.0285714
GO:0097345	mitochondrial outer membrane permeabilization	P	1	35	17	6210	0.0588235	0.00563607	over	Q5JSB5	A8K787, P54652, P0DMV9, Q5JSB5, Q8N9M5, P12236, B3KN04, Q86YQ0, Q96HI4, P63167, P61981, B5BUB8, H3BST5, P63104, P27348, P62258, B1PL87, B4DS67, Q04917, Q5F2F8, Q2QL34, H7BXZ6, P31946, O43521, B2RB23, P31947, P34931, P11142, B3KSM6, B3KRK7, Q96FJ2, Q07812, B2R6X5, P05141, Q9BXH1	0.0917255	0.36153	0.0285714
GO:0034754	cellular hormone metabolic process	P	1	35	17	6210	0.0588235	0.00563607	over	Q16678	Q15738, H0YKF9, Q9BTZ2, Q9NRW5, P37059, Q53GQ0, Q02338, P05091, B2R761, P47895, Q15125, P08842, A0A0A0MSS8, B4DK69, O75911, F5H324, P29762, Q8TC12, P22570, Q16678, Q15648, P30837, Q8IZV5, P10109, D6RCD0, P17516, C8C069, C9IZF6, O60218, P15121, P14550, B4DKB2, P0DMM9, B2R659, P00352	0.0917255	0.36153	0.0285714
GO:1902403	signal transduction involved in mitotic DNA integrity checkpoint	P	1	35	17	6210	0.0588235	0.00563607	over	Q5JSB5	B2RE59, Q09472, P30307, Q5JSB5, P14635, P78527, O43715, A5YKK6, Q96L51, Q9UH60, A0A024QZP7, Q5QPD4, P62979, H0Y9C1, E9PKG1, Q9C0C2, B7Z9U0, Q16254, A0A0S2Z3I0, P06748, B3KM57, Q59EF0, Q86XZ2, P31947, B3KP18, P12004, Q86X55, B7Z6J7, Q9H9A5, A5YRV2, Q9UKZ1, Q07812, P62987, Q99856, F8VV52	0.0917255	0.36153	0.0285714
GO:0003712	transcription cofactor activity	F	2	188	17	6210	0.117647	0.0302738	over	B4DXI2, Q5JSB5	Q86TU7, P78545, Q9UKL0, Q5T911, B4E299, Q5JSB5, P12814, M0R205, B3KR25, O00422, O00268, Q8TDD1, P17275, H3BT57, B4DYQ3, P62195, Q9ULW3, A8K2R3, F2Z2U4, O94906, B2R506, Q13363, H0Y5N4, Q9UBK9, B4DTY4, Q15545, Q5T6U8, Q16512, Q3SY98, Q5VTR2, A0A169TED2, M0R2P1, Q59H57, B3KRT9, A8K0D4, Q5JTV1, Q96T76, E9PQX9, O75381, K7EIJ0, B2R8X4, B3KNC3, Q99991, Q92841, Q6NX55, B4DYZ9, C9J7T7, B3KUA2, Q96EB6, B4D…	0.0921063	0.36153	0.0106383
GO:0010556	regulation of macromolecule biosynthetic process	P	6	1204	17	6210	0.352941	0.193881	over	K7ER90, B4DXI2, A0A1B0GVI7, B4DUP5, Q5JSB5, Q96AE4	B2RAH5, Q9BRZ2, Q9NQU5, O00148, B2RAH2, Q8TDD1, Q68E09, H3BV98, H3BT57, E7ETD6, Q8N3U4, A8K2R3, B3KRB7, H0YN81, B2R506, Q92974, B4DL02, A0A024R669, D6RBL4, Q9H4L7, H0Y6H0, Q5VTR2, C8C069, Q8NDV7, E9PGT3, B3KY11, B2RAI2, F8VZJ2, P0CJ79, P51116, O60216, Q96EB1, A0A0C4DFT3, P62487, B2R8X4, Q2VIN3, Q6NX55, A8K6Y1, A0A0A8K8C0, J3QR41, O15405, Q96EB6, B4DMT5, A8K103, Q9UKV8, F5H136, B4DMT1, A0A024R5X6,…	0.0933513	0.362104	0.00498339
GO:0055076	transition metal ion homeostasis	P	1	36	17	6210	0.0588235	0.0057971	over	G3V1D1	C9J1Z8, H0YLF3, P04732, B2RB38, B4E1V0, A0A024R610, Q8NEW0, B7Z8Q4, P18085, P53384, Q9Y6M5, A0A024R5L7, G3V1D1, O00244, D6RE86, Q59G44, O43819, B2R7U4, A0A0S2Z5C8, H7C5E8, P61204, Q5TCZ7, P02786, C9J0K6, Q9BT67, H0Y953, B4DPB6, A0A0A6YY96, A0A0S2Z3Y4, B2R9R2, O14617, P30519, C9JAX1, B4DQ79, P02795, P21399	0.094226	0.362104	0.0277778
GO:1902108	regulation of mitochondrial membrane permeability involved in apoptotic process	P	1	36	17	6210	0.0588235	0.0057971	over	Q5JSB5	A8K787, P54652, P0DMV9, Q5JSB5, Q8N9M5, P12236, B3KN04, Q86YQ0, Q96HI4, P63167, P61981, B5BUB8, H3BST5, P63104, P27348, P62258, B1PL87, B4DS67, Q04917, Q5F2F8, Q2QL34, H7BXZ6, P31946, O43521, B2RB23, P31947, P34931, P11142, B3KSM6, B3KRK7, Q96FJ2, Q07812, B2R6X5, P05141, Q9BXH1, Q5T1C6	0.094226	0.362104	0.0277778
GO:0035794	positive regulation of mitochondrial membrane permeability	P	1	36	17	6210	0.0588235	0.0057971	over	Q5JSB5	A8K787, P54652, P0DMV9, Q5JSB5, Q8N9M5, P12236, B3KN04, Q86YQ0, Q96HI4, P63167, P61981, B5BUB8, H3BST5, Q9Y5Z4, P63104, P27348, P62258, B1PL87, B4DS67, Q04917, Q5F2F8, Q2QL34, H7BXZ6, P31946, O43521, B2RB23, P31947, P34931, P11142, B3KSM6, B3KRK7, Q96FJ2, Q07812, B2R6X5, P05141, Q9BXH1	0.094226	0.362104	0.0277778
GO:0072401	signal transduction involved in DNA integrity checkpoint	P	1	37	17	6210	0.0588235	0.00595813	over	Q5JSB5	B2RE59, Q09472, P30307, Q5JSB5, B3KY60, P14635, P78527, O43715, A5YKK6, Q96L51, Q9UH60, A0A024QZP7, Q5QPD4, P62979, H0Y9C1, E9PKG1, Q9C0C2, B7Z9U0, Q16254, Q9UMS4, A0A0S2Z3I0, P06748, B3KM57, Q59EF0, Q86XZ2, P31947, B3KP18, P12004, Q86X55, B7Z6J7, Q9H9A5, A5YRV2, Q9UKZ1, Q07812, P62987, Q99856, F8VV52	0.09672	0.365751	0.027027
GO:0072395	signal transduction involved in cell cycle checkpoint	P	1	37	17	6210	0.0588235	0.00595813	over	Q5JSB5	B2RE59, Q09472, P30307, Q5JSB5, B3KY60, P14635, P78527, O43715, A5YKK6, Q96L51, Q9UH60, A0A024QZP7, Q5QPD4, P62979, H0Y9C1, E9PKG1, Q9C0C2, B7Z9U0, Q16254, Q9UMS4, A0A0S2Z3I0, P06748, B3KM57, Q59EF0, Q86XZ2, P31947, B3KP18, P12004, Q86X55, B7Z6J7, Q9H9A5, A5YRV2, Q9UKZ1, Q07812, P62987, Q99856, F8VV52	0.09672	0.365751	0.027027
GO:0072422	signal transduction involved in DNA damage checkpoint	P	1	37	17	6210	0.0588235	0.00595813	over	Q5JSB5	B2RE59, Q09472, P30307, Q5JSB5, B3KY60, P14635, P78527, O43715, A5YKK6, Q96L51, Q9UH60, A0A024QZP7, Q5QPD4, P62979, H0Y9C1, E9PKG1, Q9C0C2, B7Z9U0, Q16254, Q9UMS4, A0A0S2Z3I0, P06748, B3KM57, Q59EF0, Q86XZ2, P31947, B3KP18, P12004, Q86X55, B7Z6J7, Q9H9A5, A5YRV2, Q9UKZ1, Q07812, P62987, Q99856, F8VV52	0.09672	0.365751	0.027027
GO:0000989	transcription factor activity, transcription factor binding	F	2	194	17	6210	0.117647	0.0312399	over	B4DXI2, Q5JSB5	Q5T911, B4E299, Q8N108, Q5JSB5, M0R205, B3KR25, O00268, Q8TDD1, H3BT57, Q9ULW3, A8K2R3, F2Z2U4, O94906, B2R506, Q13363, Q15545, Q16512, Q3SY98, Q5VTR2, A0A169TED2, M0R2P1, B3KRT9, Q5JTV1, E9PQX9, O75381, B2R8X4, Q92841, Q6NX55, B4DYZ9, C9J7T7, Q96EB6, Q12962, Q96IZ0, Q9NRY4, P54198, Q99471, C9JRJ5, B4DXI2, B3KUJ5, P17096, B4DL06, Q59EJ8, F5H2U8, H3BNH2, O75475, Q9Y3L5, Q6IB68, A5YRV2, B9TWZ6, Q13…	0.0971681	0.365751	0.0103093
GO:0000988	transcription factor activity, protein binding	F	2	195	17	6210	0.117647	0.031401	over	B4DXI2, Q5JSB5	Q8N108, Q5T911, B4E299, Q5JSB5, M0R205, B3KR25, O00268, Q8TDD1, H3BT57, Q9ULW3, A8K2R3, F2Z2U4, O94906, B2R506, Q13363, Q15545, Q16512, Q3SY98, Q5VTR2, A0A169TED2, M0R2P1, B3KRT9, Q5JTV1, E9PQX9, O75381, B2R8X4, Q92841, Q6NX55, B4DYZ9, C9J7T7, Q96EB6, Q12962, Q96IZ0, Q9NRY4, P54198, Q99471, C9JRJ5, B4DXI2, B3KUJ5, P17096, B4DL06, Q59EJ8, F5H2U8, H3BNH2, O75475, Q9Y3L5, Q6IB68, A5YRV2, B9TWZ6, Q13…	0.0980198	0.36588	0.0102564
GO:0044819	mitotic G1/S transition checkpoint	P	1	38	17	6210	0.0588235	0.00611916	over	Q5JSB5	B2RE59, Q09472, P30307, Q71UM5, Q5JSB5, P14635, P78527, O43715, A5YKK6, Q96L51, Q9UH60, A0A024QZP7, Q5QPD4, P62979, H0Y9C1, E9PKG1, Q9C0C2, B7Z9U0, Q16254, A0A0S2Z3I0, P06748, B3KM57, Q59EF0, Q86XZ2, P31947, Q7Z5X8, P12004, Q86X55, B7Z6J7, B2R7E8, Q9H9A5, P42677, A5YRV2, Q9UKZ1, Q07812, P62987, Q99856, F8VV52	0.0992076	0.36588	0.0263158
GO:0031571	mitotic G1 DNA damage checkpoint	P	1	38	17	6210	0.0588235	0.00611916	over	Q5JSB5	B2RE59, Q09472, P30307, Q71UM5, Q5JSB5, P14635, P78527, O43715, A5YKK6, Q96L51, Q9UH60, A0A024QZP7, Q5QPD4, P62979, H0Y9C1, E9PKG1, Q9C0C2, B7Z9U0, Q16254, A0A0S2Z3I0, P06748, B3KM57, Q59EF0, Q86XZ2, P31947, Q7Z5X8, P12004, Q86X55, B7Z6J7, B2R7E8, Q9H9A5, P42677, A5YRV2, Q9UKZ1, Q07812, P62987, Q99856, F8VV52	0.0992076	0.36588	0.0263158
GO:0045786	negative regulation of cell cycle	P	2	197	17	6210	0.117647	0.031723	over	B4DXI2, Q5JSB5	I3L4A2, O43670, P36507, F8VYY9, Q5JSB5, A5YKK6, Q8TCS8, O00148, A0A0A0MSQ3, O60566, H3BT57, F8VYH9, H0YFI1, Q53S54, Q68E01, Q8N3U4, Q9BQG0, Q9BSK2, Q9C0C2, P07996, B4E0W3, C8C069, E9PGT3, B2R7E8, J3QS66, A0A0C4DFT3, P14174, A8K6Y1, J3QR41, Q15554, Q2MJK0, Q13131, Q13257, A0A024RB10, O75367, B0AZQ4, K7EIU4, H6TXS1, Q9P119, A8K4G7, B4DXI2, A0A0G2JNZ2, B7Z9U0, Q5T2B5, F5H2U8, Q96NB3, P31947, P51812,…	0.0997299	0.36588	0.0101523
GO:0014070	response to organic cyclic compound	P	2	199	17	6210	0.117647	0.0320451	over	A0A1B0GVI7, Q16678	Q9H7S9, P36507, Q5T911, B5BTZ6, Q53SF4, A5YKK6, B2RAH2, I3L412, Q8TDD1, Q02338, B2R7U4, H3BV98, F8VYH9, Q14571, P22694, Q5T6L6, Q14573, P07996, E7EMW7, A0A087WU84, P12429, P54868, C8C069, B0AZR9, Q92841, Q6NX55, B4E2J2, C9J7T7, Q96EB6, A8K103, Q9UKV8, A0A024RB10, H6TXS1, K7EIU4, B3KUJ5, Q9UJU1, O14686, B4DL06, P63104, A0A0A0MSS8, Q59EJ8, P62826, P31946, O75116, O43306, P0C0S5, Q9Y3L5, Q96GD0, F5C…	0.101449	0.36588	0.0100503
GO:0000041	transition metal ion transport	P	1	39	17	6210	0.0588235	0.00628019	over	G3V1D1	Q658P3, Q8IWU2, J3KNF4, H0YLF3, B4E1V0, Q16864, O75348, Q8NEW0, P50570, Q9Y6M5, A0A024R5L7, O00244, G3V1D1, P36543, D6RE86, P38606, Q59G44, A0A024R7P3, O43819, A0A0S2Z5C8, P08582, Q00610, H7C5E8, P27449, P02786, Q9NWI4, B2R7M1, B3KR70, O15431, B5MC02, P21283, P21281, Q53ET5, A0A0A6YY96, Q14061, G3V2S6, G3V126, Q99497, E7ENT5	0.101689	0.36588	0.025641
GO:0070661	leukocyte proliferation	P	1	39	17	6210	0.0588235	0.00628019	over	A0A1B0GVI7	P09429, P00491, H3BLV0, K7ENH8, Q86TY5, H7BYW5, P15529, A6MUU8, B7ZMB3, P12931, A0A0S4XQV4, F6IR49, Q05209, Q5U071, A0A1B0GVI7, P60033, P04083, B9VP24, R4GN18, C9JAB9, U5YKD2, B4DK26, P10747, B4DJ85, Q53TG4, A0A024R3E0, P10644, Q8IWL5, E7ES08, A0A090MEX8, P17812, P14174, K7EPR5, Q16466, B4DQ79, B2RA70, Q9NRF8, P10809, B7Z532	0.101689	0.36588	0.025641
GO:0003697	single-stranded DNA binding	F	1	39	17	6210	0.0588235	0.00628019	over	Q96AE4	Q9NYB0, B4E0X8, P27694, B5MC59, P67809, I7GPQ7, G3V2F4, B4E0X0, A8K1E1, F8W6I7, Q04837, A0A087WUK2, D6R9P3, Q2NKM7, Q96AE4, H0YNU5, B4DEA3, Q12771, Q15365, Q9GZP8, B4DUQ1, P51991, Q8WWH8, A8K1J3, H0Y818, C9J167, O00373, P38935, P53999, B2R7E8, P22626, K7EQZ3, Q2NLD4, H3BRU6, Q99497, Q15554, Q92889, P43246, A8K146	0.101689	0.36588	0.025641
GO:0044783	G1 DNA damage checkpoint	P	1	39	17	6210	0.0588235	0.00628019	over	Q5JSB5	B2RE59, Q09472, P30307, Q71UM5, Q5JSB5, P14635, P78527, O43715, A5YKK6, Q96L51, Q9UH60, A0A024QZP7, Q5QPD4, P62979, H0Y9C1, E9PKG1, Q9C0C2, B7Z9U0, Q16254, A0A0S2Z3I0, P06748, B3KM57, Q59EF0, Q86XZ2, P31947, Q7Z5X8, E9PMZ7, P12004, Q86X55, B7Z6J7, B2R7E8, Q9H9A5, P42677, A5YRV2, Q9UKZ1, Q07812, P62987, Q99856, F8VV52	0.101689	0.36588	0.025641
GO:0008134	transcription factor binding	F	2	201	17	6210	0.117647	0.0323671	over	A0A1B0GVI7, Q5JSB5	G5E9G6, F2Z2V0, Q5T911, Q9BW34, Q5JSB5, B5BTZ6, A5YKK6, I3L412, Q562L9, E7ETD6, Q9Y2X3, Q9BQG0, Q14690, A8K2R3, P27348, B3KM81, B4DYY3, B2R506, Q13363, Q15545, F8VSL3, E7ES08, C9J7T7, Q2MJK0, Q96EB6, A8K103, O75369, P35998, V9GY66, B3KUJ5, P17096, Q9Y295, B4DQK1, B4DL06, P63104, Q93009, F1JVV5, Q59EJ8, F5H2U8, C9JCN8, P31946, Q13707, P68133, O75475, P19838, B4DDB5, Q562M3, B9TWZ6, Q14247, F5GWX5,…	0.103177	0.367577	0.00995025
GO:1902495	transmembrane transporter complex	C	1	40	17	6210	0.0588235	0.00644122	over	Q9UDW1	A0A1B0GUR5, P31930, Q14247, B4E1V1, Q13733, Q8IYU8, P16615, A6PVN5, Q8NE86, B2RAH2, Q9UDW1, A8K1C7, Q9UG63, O14949, P63165, Q92796, P22694, H7C492, B2RDW0, H3BTA8, B1N7G7, Q567R0, Q12797, Q9ULS6, A0A0A0MRE9, P14927, B3KW93, A0A059RS35, O75052, B3KSN3, S4R3D7, P17612, P54709, Q9NWR8, A5YM53, P47985, P05023, A0A1B0GW58, P62942, P05026	0.104163	0.367577	0.025
GO:0008194	UDP-glycosyltransferase activity	F	1	40	17	6210	0.0588235	0.00644122	over	Q4G148	D6RF69, C9JQ42, Q05BM8, B4DEN5, Q10469, Q7Z7M9, B4DL56, B3KP69, Q499Z2, A8K6K7, Q9NYU1, O60568, Q9NYU2, Q8NBJ5, Q9Y2C3, Q9H1B5, Q58A70, G3V150, Q10471, O15294, Q86X52, B3KM35, Q8IZ52, Q8NAT1, Q6NUL1, Q4G148, H0YKI1, B3KQT5, F8VUJ3, B4DLB8, P19224, Q9BVJ8, B7Z5C5, D3DQI7, H0Y9B6, Q86SF2, B2R8J0, Q9HC03, P07686, B2R758	0.104163	0.367577	0.025
GO:0035326	enhancer binding	F	1	40	17	6210	0.0588235	0.00644122	over	A0A1B0GVI7	Q5TEC6, F5GWX5, P25490, A8K3K1, B2R6Y1, Q9UBB5, B4DI77, Q59F45, Q562L9, A0A1B0GVI7, Q2TAM5, B3KUJ5, Q562T9, Q9Y230, Q16576, J3KMX2, O95983, Q7Z5J4, Q562R1, K4ENJ5, Q562Z4, O94776, A6NGV6, O96019, B4DGM3, Q13707, P0C0S5, B5BU61, A0A0U1RRM1, P68133, Q59G16, Q09028, H0YNQ5, P51532, Q58EY4, P19838, Q562M3, B4E1P2, G3V4W0, B4E335	0.104163	0.367577	0.025
GO:0071158	positive regulation of cell cycle arrest	P	1	41	17	6210	0.0588235	0.00660225	over	Q5JSB5	B2RE59, Q09472, O43159, F6R503, P30307, Q5JSB5, P14635, H6TXS1, O43715, A5YKK6, Q96L51, A0A0A0MSQ3, Q9UH60, A0A024QZP7, Q5QPD4, Q9BQG0, P62979, H0Y9C1, E9PKG1, Q9C0C2, B7Z9U0, Q16254, A0A0S2Z3I0, F5H2U8, P06748, B3KM57, Q59EF0, Q86XZ2, P31947, P12004, Q86X55, B7Z6J7, Q9H9A5, Q8IUI8, Q15172, A5YRV2, Q9UKZ1, Q07812, P62987, Q99856, F8VV52	0.106632	0.369278	0.0243902
GO:0016125	sterol metabolic process	P	1	41	17	6210	0.0588235	0.00660225	over	Q16678	A0A024R3R5, Q15738, A0A1B0GW73, Q9NRW5, A8KA68, P53602, E5RHW4, Q2VF42, A0A0S2Z3V0, A8KA27, B4DHX0, C9J6G3, Q15125, Q12770, B4E1M2, P48449, B7Z301, P00441, Q15800, Q15126, P53396, Q16678, P22570, P10109, P06727, B3KR97, A0A0S2Z4Q3, A8K0D2, O75477, B4DE48, P37268, P14324, E1A689, Q2Q9H2, Q13907, A0A024R4E5, H0YEN6, B3KRC6, Q3LIE7, Q8N995, F8W696	0.106632	0.369278	0.0243902
GO:0031072	heat shock protein binding	F	1	41	17	6210	0.0588235	0.00660225	over	A0A1B0GVI7	P23396, P54652, P0DMV9, Q9BW34, B4DFV7, P53602, B7Z8G2, F8WF76, A0A1B0GVI7, Q99543, Q8IXB1, O60884, P24534, E5KN59, Q15785, P25685, E7ESU0, A8K4T2, B3KM81, P31689, H3BUD0, A8K9X5, P34931, Q02790, D3DWK1, Q96GD0, P11142, Q8WXX5, B3KSM6, B4DWN1, B3KNA1, Q49A72, P12270, B2R6X5, E9PJB2, E7EU96, Q16543, A0A024R394, H7BYY2, Q9NZJ4, Q59FG7	0.106632	0.369278	0.0243902
GO:0006417	regulation of translation	P	2	205	17	6210	0.117647	0.0330113	over	K7ER90, B4DUP5	P36507, Q92615, O75822, Q9BW34, B5BTZ6, A5YKK6, O00148, Q9UBS0, H3BV98, H3BT57, P07996, C9J185, P38919, B7ZKK7, D6RBL4, Q5ZEY3, P13639, H0YME5, E7EUU4, Q53TG4, P41091, Q8NDV7, E9PGT3, P51116, P68104, A8K3B8, Q9UI10, D6RGF0, P20042, C9J7T7, B4DMT5, Q9UKV8, Q9Y2Y8, Q16768, A0A024R7L5, C9JRJ5, P40429, B4DTQ5, Q13144, Q14232, B7Z9U0, Q9NZI8, Q9BY44, P62826, Q2L6I2, P51812, A0A087WZ41, B2R8Z8, Q13151,…	0.106658	0.369278	0.0097561
GO:0031326	regulation of cellular biosynthetic process	P	6	1248	17	6210	0.352941	0.200966	over	K7ER90, B4DXI2, A0A1B0GVI7, B4DUP5, Q5JSB5, Q96AE4	B2RAH5, Q9BRZ2, Q9NQU5, O00148, B2RAH2, Q8TDD1, Q68E09, H3BV98, H3BT57, E7ETD6, Q8N3U4, A8K2R3, B3KRB7, H0YN81, B2R506, Q92974, B4DL02, A0A024R669, D6RBL4, Q9H4L7, H0Y6H0, Q5VTR2, C8C069, Q8NDV7, E9PGT3, B3KY11, B2RAI2, F8VZJ2, P0CJ79, P51116, O60216, Q96EB1, A0A0C4DFT3, P62487, B2R8X4, Q2VIN3, Q6NX55, A8K6Y1, A0A0A8K8C0, J3QR41, O15405, Q96EB6, B4DMT5, A8K103, Q9UKV8, F5H136, B4DMT1, A0A024R5X6,…	0.107387	0.370057	0.00480769
GO:0046902	regulation of mitochondrial membrane permeability	P	1	42	17	6210	0.0588235	0.00676329	over	Q5JSB5	A8K787, P54652, P0DMV9, Q5JSB5, Q8N9M5, P12236, B3KN04, E9PEQ6, Q86YQ0, Q96HI4, P63167, P61981, B5BUB8, H3BST5, Q9Y5Z4, P63104, P27348, P62258, B1PL87, B4DS67, Q04917, P49792, Q5F2F8, Q2QL34, H7BXZ6, P31946, O43521, B2RB23, P31947, P34931, P11142, B3KSM6, B2R6X6, B3KRK7, Q96FJ2, Q07812, B2R6X5, P05141, A0A0S2Z3D2, Q9BXH1, A8K486, Q5T1C6	0.109094	0.370716	0.0238095
GO:0006721	terpenoid metabolic process	P	1	42	17	6210	0.0588235	0.00676329	over	Q16678	Q5SRP5, P49189, H0YKF9, O75487, H0YHN9, P11766, P51648, P31431, Q5SYZ4, A0A0S2Z3V0, B4DHX0, P05091, C9J6G3, P47895, A0A0A0MSS8, B4DK69, O75911, Q8TC12, P29762, A0A024RAB6, Q16678, P30837, Q8IZV5, P06727, Q9HDC9, P17516, P37268, P14324, E1A689, C9IZF6, A0A087X208, O60218, Q13907, P35052, P15121, P18827, P30838, P02656, F8W696, P00352, E7EMT5, E9PP15	0.109094	0.370716	0.0238095
GO:0051651	maintenance of location in cell	P	1	42	17	6210	0.0588235	0.00676329	over	G3V1D1	Q59GI3, O75369, E9PK00, G3V1D1, P16615, H7C2K6, A8KA62, A0A024R3H2, P31751, A0A0C4DG40, P36404, Q5STV6, B4DZU5, P61981, Q96H29, H3BT57, Q9Y4G6, A0A024R2W4, E9PB90, P63104, P27348, C9J0K6, Q04917, Q9Y490, A0A024R8Q1, A8K9X5, B3KT70, P31946, Q12955, Q8WXH0, P31749, F6KPG5, B4DG62, B3KQT9, A0A024R847, B4DPB6, A0A146IHP0, Q6NT72, P11021, Q9H4A6, B7Z992, P21333	0.109094	0.370716	0.0238095
GO:0008509	anion transmembrane transporter activity	F	1	43	17	6210	0.0588235	0.00692432	over	Q9BYH2	U3KPV2, H0YDD9, Q8TDW0, A0A024RBE8, B4E1V1, Q14802, Q9C0H2, B3KVU0, P45880, Q15758, M0R106, Q49AE1, B4DWC4, D3DTY0, P53007, I3L4X2, Q6N075, Q59GY6, A8K1C7, A0A087WXS7, I3L1P8, C9JZL5, B4E106, Q5Y190, Q9Y6R1, B3KMV8, Q9Y277, Q53GR7, P55011, Q53GZ4, O00299, Q9HCE9, D6RIZ4, H0YMQ9, A0A0G2JNW7, Q9BYH2, Q8TAG3, B4DPL8, E9PJH7, B2R7N6, B5M450, O15427, P21796	0.111549	0.373867	0.0232558
GO:1905477	positive regulation of protein localization to membrane	P	1	43	17	6210	0.0588235	0.00692432	over	Q5JSB5	Q5JSB5, B3KN05, Q86YS7, B3KN04, P33176, Q5VV41, Q12846, P31751, B7Z3E5, B2R7D7, Q86YQ0, Q96HI4, P63244, P63167, P61981, B5BUB8, Q99828, P63104, P27348, P62258, B1PL87, Q04917, P05556, Q5F2F8, A0A0C4DGE4, P31946, O43521, P04626, P31749, P31947, Q01082, O14737, Q9Y3D6, P84095, B4E0H8, A0A0C4DFT3, Q96FJ2, Q8WUJ3, H3BPW1, Q9HD47, P29317, Q9BXH1, B2RCZ4	0.111549	0.373867	0.0232558
GO:0042445	hormone metabolic process	P	1	43	17	6210	0.0588235	0.00692432	over	Q16678	Q15738, P49189, H0YKF9, Q9BTZ2, Q9NRW5, P37059, Q53GQ0, Q02338, P05091, O60344, B2R761, P47895, Q15125, P08842, A0A0A0MSS8, B4DK69, H3BUD0, O75911, F5H324, P29762, Q8TC12, P22570, Q16678, Q15648, P30837, A6NGV6, P10109, D6RCD0, Q8IZV5, P17516, C8C069, C9IZF6, O60218, P15121, P14550, Q5U000, B4DKB2, A0A1B0GTB0, Q9H2A9, H0YB13, P0DMM9, B2R659, P00352	0.111549	0.373867	0.0232558
GO:0016705	oxidoreductase activity, acting on paired donors, with incorporation or reduction of molecular oxygen	F	1	44	17	6210	0.0588235	0.00708535	over	Q16678	O00767, B4DVX3, B4DGN8, Q6ZMT4, O15121, Q7RTP6, H0YJF3, Q5VSQ6, H0Y589, O60568, H0Y3Z3, F5H8G5, B4DHX0, B2R7U4, A0A1B0GUC3, Q96SQ9, A0A0A0MSS8, P07237, B4DHG3, B2WTI3, Q15800, Q8N3P5, B4DK69, Q9NXG6, Q12797, A6N6J7, Q9Y2Z9, Q16678, Q9BU89, P17516, Q6P6C2, Q8IVL5, P13674, J3QRG1, A0A0A0MTR2, Q8NFU7, Q05DA4, P30519, Q32P28, B3KRC6, E7EMT5, Q9NVH6, A0A0S2Z5P8, Q53RS5	0.113998	0.376509	0.0227273
GO:0090559	regulation of membrane permeability	P	1	44	17	6210	0.0588235	0.00708535	over	Q5JSB5	A8K787, P54652, P0DMV9, Q5JSB5, A0A024R233, Q8N9M5, E9PEQ6, P12236, B3KN04, Q86YQ0, Q96HI4, P63167, D3DVF0, P61981, B5BUB8, H3BST5, Q9Y5Z4, P63104, P27348, P62258, B1PL87, B4DS67, Q04917, P49792, Q5F2F8, Q2QL34, H7BXZ6, P31946, O43521, B2RB23, P31947, P34931, P11142, B3KSM6, B2R6X6, B3KRK7, Q96FJ2, Q07812, B2R6X5, P05141, A0A0S2Z3D2, Q9BXH1, A8K486, Q5T1C6	0.113998	0.376509	0.0227273
GO:0051238	sequestering of metal ion	P	1	44	17	6210	0.0588235	0.00708535	over	G3V1D1	Q8NEW0, P19174, Q49AE1, Q9Y6M5, Q5SWX3, G3V1D1, B4DWC4, A8KA62, B4DDT3, B7Z8G2, B2R983, H9KV50, D6R938, P21266, Q14571, H7C2Z6, P22694, C9J0K6, B2RDW0, Q14573, Q12797, B7ZLE0, Q8IWX8, Q12955, B3KW93, Q53G71, A0A140T8Z0, Q02790, P46439, P17612, O14617, P42858, A0A0U1RRH1, Q00688, Q8WUJ3, P09488, H3BPW1, P41208, B4E2J2, Q9NYL4, Q9BXH1, P26885, H3BM67, P62942	0.113998	0.376509	0.0227273
GO:0009889	regulation of biosynthetic process	P	6	1269	17	6210	0.352941	0.204348	over	K7ER90, B4DXI2, A0A1B0GVI7, B4DUP5, Q5JSB5, Q96AE4	B2RAH5, Q9BRZ2, Q9NQU5, O00148, B2RAH2, Q8TDD1, Q68E09, H3BV98, H3BT57, E7ETD6, Q8N3U4, A8K2R3, B3KRB7, H0YN81, B2R506, Q92974, B4DL02, A0A024R669, D6RBL4, Q9H4L7, H0Y6H0, Q5VTR2, C8C069, Q8NDV7, E9PGT3, B3KY11, B2RAI2, F8VZJ2, P0CJ79, P51116, O60216, Q96EB1, A0A0C4DFT3, P62487, B2R8X4, Q2VIN3, Q6NX55, A8K6Y1, A0A0A8K8C0, J3QR41, O15405, Q96EB6, B4DMT5, A8K103, Q9UKV8, F5H136, B4DMT1, A0A024R5X6,…	0.114494	0.376509	0.00472813
GO:0045944	positive regulation of transcription from RNA polymerase II promoter	P	2	216	17	6210	0.117647	0.0347826	over	A0A1B0GVI7, Q5JSB5	P18085, P67809, Q5JSB5, B5BTZ6, Q53SF4, B2RAH5, B3KR25, P13984, B2RAH2, I3L412, Q8WWQ0, E5KSX8, H0YN81, A8K2R3, B3KRB7, D6RHI7, B4DUQ1, Q13363, O94906, B2R506, Q92974, A0A024R669, Q15545, B2RMQ4, Q53TG4, C8C069, E9PGT3, E7ES08, B2R8X4, Q92841, Q2VIN3, Q96EB6, Q9ULX6, Q6LCB0, P22466, C9J1Z8, A8K103, Q9UKV8, A8MX75, Q9BVP2, A0A024R5X6, B3KR49, P35998, H6TXS1, Q9NY61, E9PMQ6, Q01105, B3KUJ5, Q9NQG5,…	0.116401	0.376509	0.00925926
GO:0034248	regulation of cellular amide metabolic process	P	2	216	17	6210	0.117647	0.0347826	over	K7ER90, B4DUP5	P36507, Q92615, O75822, Q9BW34, B5BTZ6, A5YKK6, O00148, Q9UBS0, A4D1B7, H3BV98, H3BT57, P07996, C9J185, P38919, B7ZKK7, D6RBL4, Q5ZEY3, P13639, H0YME5, E7EUU4, Q53TG4, P41091, Q8NDV7, E9PGT3, P51116, P68104, A8K3B8, Q9UI10, D6RGF0, P20042, C9J7T7, B4DMT5, Q9UKV8, Q9Y2Y8, Q16768, A0A024R7L5, C9JRJ5, P40429, B4DTQ5, Q13144, Q14232, B7Z9U0, Q9NZI8, Q9BY44, P62826, Q2L6I2, P51812, A0A087WZ41, B2R8Z8,…	0.116401	0.376509	0.00925926
GO:0030203	glycosaminoglycan metabolic process	P	1	45	17	6210	0.0588235	0.00724638	over	Q4G148	I3NI22, B4DTT0, Q14769, B4DEN5, Q7Z7M9, B7Z5S9, A0A1B0GW73, O75487, Q499Z2, P51884, P31431, P15104, B2RAH2, O60701, C9JZL5, Q8NCH0, Q00610, Q9H1B5, G3V150, Q86X52, B3KM35, A0A024RAB6, Q8IZ52, Q4G148, Q6NUL1, B3KQT5, B3KN15, B4DLB8, Q5T985, O75330, O95782, A0A087X208, B4DTH9, P35052, Q9BVJ8, P16278, B2R6Z9, P19838, H0Y9B6, P18827, Q8WUJ3, P07686, G3XAD2, Q8IW92, H0YD13	0.116441	0.376509	0.0222222
GO:1990351	transporter complex	C	1	45	17	6210	0.0588235	0.00724638	over	Q9UDW1	A0A1B0GUR5, P31930, Q14247, B4E1V1, Q13733, Q8IYU8, P16615, A6PVN5, Q8NE86, B2RAH2, Q9UDW1, A8K1C7, Q9UG63, O14949, P63165, Q92796, P22694, H7C492, B2RDW0, H3BTA8, B1N7G7, Q567R0, Q12797, Q9ULS6, A0A0A0MRE9, P14927, B3KW93, Q9Y5L4, A0A059RS35, P62072, O75052, B3KSN3, S4R3D7, P17612, Q9Y5J7, Q9Y5J6, Q9Y5J9, P54709, Q9NWR8, A5YM53, P47985, P05023, A0A1B0GW58, P62942, P05026	0.116441	0.376509	0.0222222
GO:0006357	regulation of transcription from RNA polymerase II promoter	P	3	447	17	6210	0.176471	0.0719807	over	B4DXI2, A0A1B0GVI7, Q5JSB5	P67809, B2RAH5, A5YKK6, B2RAH2, E7ETD6, H9KV93, A8K2R3, B3KRB7, H0YN81, B3KM81, B2R506, Q92974, A0A024R669, Q3SY98, C8C069, E9PGT3, F8VZJ2, B2RAI2, Q5JTV1, O60216, A0A0C4DFT3, Q96EB1, B2R8X4, H0UI99, Q92841, Q2VIN3, Q6NX55, C9J7T7, J3QR41, Q96EB6, Q9ULX6, O15525, Q9UK58, A8K103, Q9UKV8, A8MX75, Q59FM7, A0A024R5X6, Q9NRY4, H6TXS1, Q5T5X7, P18615, B4DXI2, B3KUJ5, Q6MZZ4, Q9UJU1, O14686, B4DL06, A8K…	0.118792	0.379374	0.00671141
GO:1902807	negative regulation of cell cycle G1/S phase transition	P	1	46	17	6210	0.0588235	0.00740741	over	Q5JSB5	B2RE59, Q09472, Q6P1J9, H6WA46, P30307, Q71UM5, A0A0D9SEY7, Q5JSB5, P14635, P78527, K7EIU4, O43715, A5YKK6, Q96L51, Q9UH60, A0A024QZP7, Q5QPD4, P62979, H0Y9C1, E9PKG1, Q9C0C2, B7Z9U0, Q16254, A0A0S2Z3I0, B3KV92, P06748, B3KM57, Q59EF0, Q86XZ2, P31947, Q7Z5X8, A0A024R6Q8, P51532, P12004, Q86X55, B7Z6J7, B2R7E8, Q9H9A5, P42677, A5YRV2, Q9UKZ1, Q07812, B4DTN0, P62987, Q99856, F8VV52	0.118877	0.379374	0.0217391
GO:2000134	negative regulation of G1/S transition of mitotic cell cycle	P	1	46	17	6210	0.0588235	0.00740741	over	Q5JSB5	B2RE59, Q09472, Q6P1J9, H6WA46, P30307, Q71UM5, Q5JSB5, A0A0D9SEY7, P14635, P78527, K7EIU4, O43715, A5YKK6, Q96L51, Q9UH60, A0A024QZP7, Q5QPD4, P62979, H0Y9C1, E9PKG1, Q9C0C2, B7Z9U0, Q16254, A0A0S2Z3I0, P06748, B3KM57, Q59EF0, B3KV92, Q86XZ2, P31947, Q7Z5X8, A0A024R6Q8, P51532, P12004, Q86X55, B7Z6J7, B2R7E8, Q9H9A5, P42677, A5YRV2, Q9UKZ1, Q07812, P62987, B4DTN0, Q99856, F8VV52	0.118877	0.379374	0.0217391
GO:0006022	aminoglycan metabolic process	P	1	47	17	6210	0.0588235	0.00756844	over	Q4G148	I3NI22, B4DTT0, B4DQ98, Q14769, B4DEN5, Q7Z7M9, B7Z5S9, A0A1B0GW73, O75487, Q499Z2, P51884, P31431, P15104, B2RAH2, O60701, C9JZL5, Q8NCH0, Q00610, Q9H1B5, G3V150, Q86X52, A0A024RCB5, B3KM35, A0A024RAB6, Q8IZ52, Q4G148, Q6NUL1, B3KQT5, B3KN15, B4DLB8, Q5T985, O75330, O95782, A0A087X208, B4DTH9, P35052, Q9BVJ8, P16278, B2R6Z9, P19838, H0Y9B6, P18827, Q8WUJ3, P07686, G3XAD2, Q8IW92, H0YD13	0.121307	0.385453	0.0212766
GO:0006897	endocytosis	P	2	223	17	6210	0.117647	0.0359098	over	B7ZL14, Q05BX6	P19174, O75146, A0A0K2BMD8, I3L412, P61020, P48729, K7ELY9, Q562L9, B2RAY1, Q9H0U4, O15511, Q9UK41, Q0JRZ9, P09496, P07996, B4DUQ1, A0A0C4DGG1, Q8TF74, P12429, Q5JVZ8, Q53TG4, P59998, Q9Y4L1, E7ES08, Q9Y2H2, P61158, Q05BX6, Q9H5M4, A8K103, H0YLF3, Q12965, B3KR49, Q9BR76, A8KAQ3, Q5T0N5, P51809, O00291, P61160, B4DLA1, Q9UJU6, P61966, B3KR50, Q59GN8, Q13707, A0A075B6H6, P68133, B3KML1, Q7L576, B7Z…	0.122722	0.388268	0.00896861
GO:0044773	mitotic DNA damage checkpoint	P	1	50	17	6210	0.0588235	0.00805153	over	Q5JSB5	A6H8Y5, Q71UM5, Q5JSB5, P14635, O43715, A5YKK6, Q96L51, Q9UH60, H0YNU5, Q5QPD4, H0Y9C1, E9PKG1, Q9C0C2, A0A0S2Z3I0, P06748, B3KM57, Q7Z5X8, B7Z6J7, B2R7E8, Q9H9A5, P20248, Q9UKZ1, Q07812, F8VV52, B2RE59, Q09472, P30307, A0A024RB10, P78527, P49959, A0A024QZP7, P62979, B7Z9U0, Q16254, Q14676, F5H2U8, Q59EF0, Q86XZ2, P31947, A8K0J3, B3KP18, H3BTH1, P12004, Q86X55, Q7L7X3, P42677, A5YRV2, P62987, Q96…	0.12856	0.404991	0.02
GO:0007423	sensory organ development	P	1	51	17	6210	0.0588235	0.00821256	over	Q16678	A0A024RBC7, H0YKF9, Q49AE1, Q53SF4, Q6QNY0, P05091, H0Y5N4, Q4LE74, A1X283, Q16678, P30837, Q59EH0, O96019, B5BU61, Q86WJ1, C8C069, P55316, B1APR7, B4DKB2, B4DVP5, B3KRK7, Q07812, O15525, C9K088, Q6IEH8, Q9UKN7, B9A012, Q06124, B4DI77, Q9H5Y7, O43819, B3KUJ5, E7BSV0, Q15042, P47895, B2R6U9, O14646, Q6SYC2, O15078, Q15648, P21281, A0A0A0MSX3, O75197, P51532, Q9HCK8, O75084, F8WEW9, Q16344, P29317,…	0.130965	0.409056	0.0196078
GO:0030330	DNA damage response, signal transduction by p53 class mediator	P	1	51	17	6210	0.0588235	0.00821256	over	Q5JSB5	A6H8Y5, Q5JSB5, Q53TD0, P14635, O43715, A5YKK6, Q96L51, Q9UH60, Q5QPD4, A8K2R3, H0Y9C1, E9PKG1, Q9C0C2, Q14694, A0A0S2Z3I0, P06748, B3KM57, B7Z6J7, Q9H9A5, P14174, Q9UKZ1, Q07812, Q96EB6, F8VV52, P09429, B2RE59, Q09472, P30307, Q13535, A6MUU8, C9JKQ0, A0A024QZP7, A0A0A0MRM8, P62979, J3KTA4, B7Z9U0, Q16254, Q59EJ8, Q59EF0, Q8N959, B4DEQ6, B1AJY5, Q86XZ2, P31947, P51812, P12004, Q86X55, A5YRV2, P62…	0.130965	0.409056	0.0196078
GO:0071156	regulation of cell cycle arrest	P	1	53	17	6210	0.0588235	0.00853462	over	Q5JSB5	O43159, F6R503, Q5JSB5, B2R9L6, P14635, O43715, A5YKK6, Q96L51, A0A0A0MSQ3, F8VYH9, Q9UH60, Q5QPD4, Q9BQG0, B7Z6Y2, O75909, Q9BSK2, H0Y9C1, E9PKG1, Q9C0C2, A0A0S2Z3I0, P06748, B3KM57, B7Z6J7, Q9H9A5, Q8IUI8, P14174, Q9UKZ1, Q5JSL0, Q07812, F8VV52, B2RE59, Q09472, P30307, A6MUU8, P31751, H6TXS1, Q00535, Q00534, A0A024QZP7, P62979, B7Z9U0, Q16254, F5H2U8, Q59EF0, Q86XZ2, P31947, P12004, Q86X55, P17…	0.135756	0.422224	0.0188679
GO:0044774	mitotic DNA integrity checkpoint	P	1	54	17	6210	0.0588235	0.00869565	over	Q5JSB5	A6H8Y5, Q71UM5, Q5JSB5, P14635, O43715, A5YKK6, Q96L51, O60921, Q9UH60, H0YNU5, Q5QPD4, H0Y9C1, E9PKG1, Q9C0C2, A0A0S2Z3I0, Q13564, P06748, B3KM57, Q7Z5X8, B7Z6J7, B2R7E8, Q9H9A5, P20248, Q9UKZ1, Q07812, Q05D30, F8VV52, B2RE59, Q09472, P30307, A0A024RB10, P78527, P49959, A0A024QZP7, P62979, B7Z9U0, Q16254, Q14676, F5H2U8, Q59EF0, Q96NB3, Q86XZ2, P31947, A8K0J3, B3KP18, H3BTH1, P12004, Q86X55, Q7L…	0.138142	0.426035	0.0185185
GO:0005746	mitochondrial respiratory chain	C	1	54	17	6210	0.0588235	0.00869565	over	Q9UDW1	P31930, O75306, Q7KZN9, K9J7I2, Q9UEH5, O43678, F8WAS3, B4DEZ3, Q9UDW1, P22695, H7C492, P24311, Q567R0, H3BPJ9, O95168, R4GN43, P28331, P14927, Q9UI09, O14561, P14406, O43920, O95167, O75380, E9PKH6, Q9BTT5, F1B5L2, C9JKQ2, Q96DP0, O75489, O00483, O95298, P17568, D3DNS1, P31040, E2CZ46, O43181, A0A059QKC3, B7Z4P1, Q13423, O75438, P51970, B7Z7N1, A0A0S2Z523, O95182, Q96CU9, G3V0I5, Q14WI3, A0A059R…	0.138142	0.426035	0.0185185
GO:0006081	cellular aldehyde metabolic process	P	1	55	17	6210	0.0588235	0.00885668	over	Q16678	O95479, P37837, P31937, P49189, H0YKF9, Q9NQ88, Q96AT9, Q2VF42, A4UCT0, P05091, P36871, P60891, P09972, B4DK69, B4E022, Q9Y315, Q8TC12, B4DL86, B4DDQ8, Q16678, P10768, P30837, P52209, Q9H477, P17516, C8C069, O60218, Q8N490, P30838, P49247, B2R7R5, V9HWK1, O95336, B4DE36, P51648, P47895, A0A1B0GTG2, P11908, A0A0A0MSS8, Q49A26, Q14558, Q8IZV5, Q96G03, A0A024R529, Q2Q9H2, B4E2H5, P18669, P14550, P17…	0.140522	0.429764	0.0181818
GO:0003006	developmental process involved in reproduction	P	1	55	17	6210	0.0588235	0.00885668	over	B4DUP5	P54652, Q75MR3, Q53SF4, Q8TAF3, Q9BUG9, F1DAL7, P43034, Q9HC52, H3BMT2, Q96DA6, P49770, H0Y5N4, B4DK69, Q96SB4, K7EKE8, O75534, P17516, P55316, Q99557, P11142, B3KRK7, B4DVP5, Q07812, Q9UI10, A0A0S2Z3D2, P07602, B2RE59, Q6IEH8, Q92879, Q8IZ22, P50238, Q06124, B4DI77, Q9NR09, B4DZ85, O14686, Q13144, B4DL06, G3V5A9, A0A0A0MSS8, P00441, Q15645, B4DQY7, Q59GN8, Q96NB3, P31749, Q9HCK8, P51532, Q06310,…	0.140522	0.429764	0.0181818
GO:0007346	regulation of mitotic cell cycle	P	2	244	17	6210	0.117647	0.0392915	over	B4DXI2, Q5JSB5	I3L4A2, O43670, Q5JSB5, A5YKK6, Q8TCS8, K7ELY9, O60566, H3BT57, F8VYH9, Q68E01, Q53S54, Q9ULW0, Q9C0C2, A8K4T6, Q12834, Q16513, A0A169TED2, Q5VTR2, E9PIX7, B2R7E8, Q9NYV4, A0A0C4DFT3, Q96EB6, Q13257, A8MX75, A0A024RB10, O75367, Q9NQW6, P35998, K7EIU4, Q9P119, B4DXI2, A8K4G7, A0A0G2JNZ2, K7ES89, Q16531, P40306, P61289, E5RK09, R4GND1, B7Z9U0, F5H2U8, Q9UBE0, Q96NB3, F8VVT7, A0A024R201, P31947, Q99…	0.142199	0.430604	0.00819672
GO:0046942	carboxylic acid transport	P	1	56	17	6210	0.0588235	0.00901771	over	Q9BYH2	A0A1B0GW76, P28288, Q8NCD8, A0A0A0MTB0, P50416, Q01650, R4GMX5, D3DTY0, P53007, A0A024R0Y2, Q659F8, Q59GY6, O60488, H0YF42, Q92536, A8K132, P07996, Q8N3P5, B3KMV8, Q53GR7, B3KM58, Q9NRX5, P17516, B3KNH1, F6KPG5, A0A1B0GTB8, A8K6H9, J3QRU4, Q9UBX3, B2R7N6, B4DLN1, Q13136, Q96RG4, Q15758, M0R106, O43772, P31751, A0A0S2Z3V0, B2R921, B4DY23, B4E106, B7Z3U1, A0A024R6W0, B2R728, Q9HBR0, Q5R3B4, B4DHI5,…	0.142896	0.430604	0.0178571
GO:0048609	multicellular organismal reproductive process	P	1	56	17	6210	0.0588235	0.00901771	over	B4DUP5	B2RE34, P54652, P0DMV9, F8VYY9, Q75MR3, A6NML8, Q53SF4, P63167, P42345, O60522, X5CF57, P43034, A0A0S2Z5K8, H3BMT2, Q96HA1, P49770, Q96SB4, A0A0D9SG71, Q9Y232, K7EKE8, P55316, P11142, B3KSM6, B2R6X5, Q07812, Q9UI10, A0A087X2D8, A0A0S2Z3D2, Q59EC6, Q92879, O75525, O95453, P62891, Q5U071, K7EQ02, Q99828, O14686, Q13144, B5BUB1, G3V5A9, Q93008, P00441, Q15645, Q9Y657, Q96NB3, B3KXV2, P34931, Q08378,…	0.142896	0.430604	0.0178571
GO:0005840	ribosome	C	2	245	17	6210	0.117647	0.0394525	over	K7ER90, B4DUP5	Q92615, C9K025, O75822, Q9BW34, Q6DKI1, P62917, A0A0K2BMD8, Q8IXM3, H0YDD8, Q9UKD2, Q9NX20, A7BI36, Q9NX24, A0A087WXM6, C9JBY7, P46783, I3L3P7, H3BN98, B7ZKK7, Q9NQ50, Q9NRX2, P46781, Q9Y399, E7EUU4, A4UCR9, P41091, P51116, K7EJT5, P68104, P62241, Q9UI10, Q9BUN6, P20042, P60866, P46779, P46778, B4DMT5, P25398, B2R9J4, Q9H2W6, O60783, P40429, B4DNE0, Q13144, Q14232, K7EKI4, Q6FHK1, Q9BQ48, A0A024R…	0.143144	0.430604	0.00816327
GO:0032504	multicellular organism reproduction	P	1	57	17	6210	0.0588235	0.00917874	over	B4DUP5	B4DPP0, B2RE34, P54652, P0DMV9, F8VYY9, Q75MR3, A6NML8, Q53SF4, P42345, P63167, O60522, X5CF57, P43034, A0A0S2Z5K8, H3BMT2, Q96HA1, P49770, Q96SB4, A0A0D9SG71, Q9Y232, K7EKE8, P55316, P11142, B3KSM6, B2R6X5, Q07812, Q9UI10, A0A087X2D8, A0A0S2Z3D2, Q59EC6, Q92879, O75525, O95453, P62891, Q5U071, K7EQ02, Q99828, O14686, Q13144, B5BUB1, G3V5A9, Q93008, P00441, Q15645, Q9Y657, Q96NB3, B3KXV2, P34931,…	0.145264	0.435199	0.0175439
GO:0007600	sensory perception	P	1	58	17	6210	0.0588235	0.00933977	over	Q16678	A0A024RBC7, O95834, B2R6F5, M0QY43, Q49AE1, Q8IVM0, B3KP24, A0A0S2Z4V1, Q5EBL8, Q92696, Q96DA6, Q9HC10, Q16678, B4E1U1, Q59EH0, A0A087WU84, A0A140T8Z0, O76024, B0AZR9, Q5T4U8, O43924, B4DRL9, B1APR7, Q02846, Q9Y5J7, Q9Y5J9, E9PDF6, F5H2J1, Q6IEH8, Q9UKN7, B9A012, Q8IZ22, B4DWC4, P51884, P35237, Q7Z406, A0A1B0GWE6, A6NL08, P04181, A0A126GVT4, A0A0A0MRM8, A0A1B0GTG2, Q4KMQ1, Q8NGA1, O75911, B7Z7N1,…	0.147625	0.436923	0.0172414
GO:2000045	regulation of G1/S transition of mitotic cell cycle	P	1	58	17	6210	0.0588235	0.00933977	over	Q5JSB5	Q6P1J9, Q71UM5, A0A0D9SEY7, Q5JSB5, K7ENH8, P14635, O43715, A5YKK6, Q96L51, Q9UH60, H0YM23, Q5QPD4, H0Y9C1, E9PKG1, Q9C0C2, P78536, A0A0S2Z3I0, P06748, B3KM57, Q7Z5X8, B7Z6J7, B2R7E8, Q9H9A5, A0A0D9SFB3, Q9UKZ1, Q07812, F8VV52, B2RE59, Q09472, H6WA46, C9J2P0, P30307, P78527, P31751, K7EIU4, A0A024QZP7, E7BSV0, P62979, R4GND1, B7Z9U0, Q16254, B3KV92, Q59EF0, Q86XZ2, P31947, P31749, B4DPS0, A0A024R…	0.147625	0.436923	0.0172414
GO:0006720	isoprenoid metabolic process	P	1	58	17	6210	0.0588235	0.00933977	over	Q16678	Q8IZ83, P49189, H0YKF9, P11766, P53602, A8KA27, C9J8Q5, B4DHX0, P05091, O60762, G3V2V8, B4DK69, P30038, Q8TC12, Q16678, P30837, Q9HDC9, Q02252, P17516, P54868, P37268, P14324, A0A087X208, O60218, P35052, P30084, P30838, P55084, E9PP15, Q5SRP5, O75487, H0YHN9, P51648, P31431, Q5SYZ4, A0A0S2Z3V0, C9J6G3, P47895, A0A0A0MSS8, B7Z301, O75911, Q15126, P29762, A0A024RAB6, P40939, P06727, Q8IZV5, E1A689,…	0.147625	0.436923	0.0172414
GO:1902806	regulation of cell cycle G1/S phase transition	P	1	60	17	6210	0.0588235	0.00966184	over	Q5JSB5	Q6P1J9, Q71UM5, A0A0D9SEY7, Q5JSB5, K7ENH8, P14635, O43715, A5YKK6, Q96L51, J3KPX7, Q9UH60, H0YM23, Q9H4H8, Q5QPD4, H0Y9C1, E9PKG1, Q9C0C2, P78536, A0A0S2Z3I0, P06748, B3KM57, Q7Z5X8, B7Z6J7, B2R7E8, Q9H9A5, A0A0D9SFB3, Q9UKZ1, Q07812, F8VV52, B2RE59, Q09472, H6WA46, C9J2P0, P30307, P78527, P31751, K7EIU4, A0A024QZP7, E7BSV0, P62979, R4GND1, B7Z9U0, Q16254, B3KV92, Q59EF0, Q86XZ2, P31947, B4DPS0,…	0.15233	0.445459	0.0166667
GO:2001235	positive regulation of apoptotic signaling pathway	P	1	60	17	6210	0.0588235	0.00966184	over	Q5JSB5	P23396, F6R503, Q5JSB5, A8K525, Q96HI4, P63244, P63167, P61981, H3BT57, P27348, E9PNQ9, P07996, C9JAB9, Q04917, Q5F2F8, O43521, Q07820, P30154, A0A0S2Z3Y4, D7R525, B3KRK7, Q07812, A0A0S2Z3D2, Q13177, Q9BXH1, Q6LCB0, H6WA46, F8W7Q4, Q9NYF8, B3KN04, B1AMX8, Q03135, Q86YQ0, A0A0C4DG44, B5BUB8, K9J972, P62979, P63104, B1PL87, P62258, P00441, P23246, B2R6A3, P51572, G8JLD5, P31946, Q13546, P31947, H0Y…	0.15233	0.445459	0.0166667
GO:0042770	signal transduction in response to DNA damage	P	1	60	17	6210	0.0588235	0.00966184	over	Q5JSB5	A6H8Y5, Q5JSB5, Q53TD0, P14635, O43715, A5YKK6, Q96L51, Q9UH60, Q5QPD4, A8K2R3, H0Y9C1, E9PKG1, Q9C0C2, Q14694, A0A0S2Z3I0, P06748, B3KM57, B7Z6J7, Q9H9A5, P14174, Q9UKZ1, Q07812, Q96EB6, F8VV52, P09429, B2RE59, Q09472, P30307, Q13535, A6MUU8, B3KY60, C9JKQ0, P78527, A2RQD7, A0A024QZP7, A0A0A0MRM8, P62979, B4E0K5, J3KTA4, B1PL87, B7Z9U0, Q16254, Q59EJ8, Q9UMS4, B3KR50, Q59EF0, Q8N959, B4DEQ6, B1A…	0.15233	0.445459	0.0166667
GO:0008637	apoptotic mitochondrial changes	P	1	61	17	6210	0.0588235	0.00982287	over	Q5JSB5	P54652, P0DMV9, Q5JSB5, Q8N9M5, O75223, P16615, O43715, Q96HI4, P63167, P61981, H3BST5, B3KTJ9, E9PB90, P27348, Q04917, Q5F2F8, Q2QL34, Q9BRQ8, O43521, P28331, B2RB23, Q07820, B4DG62, P11142, B3KSM6, B2R6X6, B3KRK7, Q07812, B2R6X5, D6REW1, P05141, A0A0S2Z3D2, Q9BXH1, C9JAX1, A8K486, Q5T1C6, A8K787, Q3ZCQ8, F8W7Q4, E9PEQ6, P12236, B3KN04, Q86YQ0, A0A087WUQ6, B5BUB8, P63104, B1PL87, P62258, B4DS67,…	0.154673	0.450516	0.0163934
GO:0010628	positive regulation of gene expression	P	3	508	17	6210	0.176471	0.0818035	over	A0A1B0GVI7, Q5JSB5, Q96AE4	Q92615, P67809, B2RAH5, O00268, O00148, B2RAH2, Q562L9, E7ETD6, A8K2R3, B3KRB7, H0YN81, P07996, B2R506, Q92974, A0A024R669, Q9H4L7, Q12955, Q5VTR2, C8C069, E9PGT3, P62487, B2R8X4, Q92841, Q2VIN3, O15405, C9J7T7, Q96EB6, Q9ULX6, O15525, B4E0X8, A8K103, Q9UK58, Q9UKV8, A8MX75, Q9NYF8, A0A024R5X6, H6TXS1, P18615, B4DXI2, H0YJ25, B3KUJ5, Q6MZZ4, Q9UJU1, O14686, B4DL06, P63104, B2R6U9, F8WFB0, P26358,…	0.15743	0.456734	0.00590551
GO:0061025	membrane fusion	P	1	63	17	6210	0.0588235	0.0101449	over	Q05BX6	B4DPP0, A0A1B0GW76, Q12981, O43752, H0YJL5, Q86YS7, H3BNE1, B4DKR0, P51149, Q9NX63, O60763, P04083, O14662, H7C2Z6, P61026, P07355, C9JU58, Q9HC10, O95721, H7BZX2, Q9BV40, O75379, K7EKE8, P51153, P51636, J3QRU4, Q07812, Q96AJ9, Q8WUH2, Q15075, O15400, Q05BX6, A8K486, Q6AI38, Q15836, Q9UN37, A6NLD2, Q12846, A8KA83, C9JBG0, Q9H267, P51809, A8K4G7, Q9UES0, P61006, B4DQK1, C9JJN9, B4DVU8, Q5H9P4, Q99…	0.159341	0.460458	0.015873
GO:0007006	mitochondrial membrane organization	P	1	65	17	6210	0.0588235	0.010467	over	Q5JSB5	P54652, P07900, P0DMV9, Q5JSB5, Q8N9M5, Q9NX63, B4DEZ3, Q96HI4, P63167, P61981, H3BST5, Q9Y5Z4, P27348, Q04917, Q9Y512, Q5F2F8, Q2QL34, O95202, O43521, B9A067, Q9BRQ6, B2RB23, Q07820, B4E2B5, P11142, B3KSM6, Q9Y5J7, B2R6X6, B3KRK7, Q07812, B2R6X5, P05141, A0A0S2Z3D2, Q9BXH1, A8K486, Q5T1C6, A8K787, H7C1U8, Q3ZCQ8, B4DN54, E9PEQ6, P12236, B3KN04, A6NLD2, Q86YQ0, Q9NS69, B5BUB8, Q5XKP0, P63104, P62…	0.163985	0.472019	0.0153846
GO:0044772	mitotic cell cycle phase transition	P	2	273	17	6210	0.117647	0.0439614	over	B4DXI2, Q5JSB5	I3L4A2, Q14204, O43670, Q96GX5, Q9UPN1, Q5JSB5, Q53SF4, B2RAH5, A5YKK6, O60566, B3KUH0, F8VYH9, Q9BVA1, Q53S54, P43034, P22694, Q9ULW0, E9PNQ9, Q9C0C2, D6RHI7, A8K4T6, Q12834, Q4ZG57, B2R7E8, F5H1D6, E5RFJ8, Q2MJK0, P27694, Q13257, Q86SY9, A8MX75, Q3ZCM7, A0A024RB10, Q9NQW6, P35998, K7EIU4, H0Y589, Q6PJQ8, Q9P119, Q9NY65, B4DXI2, A8K4G7, Q16531, P40306, A8K9A5, P61289, P62136, E5RK09, R4GND1, P62…	0.170158	0.487874	0.00732601
GO:1903507	negative regulation of nucleic acid-templated transcription	P	2	274	17	6210	0.117647	0.0441224	over	B4DXI2, A0A1B0GVI7	Q9H7S9, Q96LA8, Q8N108, B5BTZ6, Q9UBB5, Q53RD8, A5YKK6, E7ETD6, H3BT57, A8K2R3, P27348, B3KM81, Q13363, P38919, Q15545, P62805, H0YLC5, Q3SY98, C8C069, B3KRT9, B2RAI2, E7ES08, E9PQX9, O75381, A0A0C4DFT3, H0UI99, Q6NX55, A8K6Y1, C9J7T7, J3QR41, Q96EB6, Q2MJK0, Q96IZ0, Q59FM7, Q9NYF8, Q9NRY4, O75367, Q99471, K7EIU4, H6TXS1, Q5T5X7, H0Y589, V9GY66, E9PMQ6, C9JRJ5, B4DXI2, B3KUJ5, Q01105, P17096, Q9U…	0.17114	0.488782	0.00729927
GO:1903749	positive regulation of establishment of protein localization to mitochondrion	P	1	70	17	6210	0.0588235	0.0112721	over	Q5JSB5	H0YNH5, P54652, P0DMV9, B3KS40, J3KND6, Q5JSB5, A0A0A0MQU3, O75063, Q96HI4, P63167, P61981, P63000, A0A075B784, P27348, A8K132, A8K330, Q04917, B5BU25, Q5F2F8, Q01081, O43521, O96019, B3KM58, P19784, A0A024R9U8, A0A140TA28, P11142, B3KSM6, E9PPR2, Q9Y3B1, B2R6X5, E7EU96, Q5U0B3, P49841, Q9BXH1, P46779, A0A087X1T2, B3KN04, O95376, Q86YQ0, B4DWC1, A0A0C4DG44, Q6P096, B5BUB8, P68036, Q5M9Q1, Q9Y371,…	0.175489	0.491294	0.0142857
GO:0005096	GTPase activator activity	F	1	70	17	6210	0.0588235	0.0112721	over	Q05BX6	B2RE34, Q9H2M9, B3KRW4, F6R503, B2R6F5, B4DE53, A0A024R637, I3L412, Q68EM7, Q59E87, B2RWP0, Q96P48, B4DHC5, B4E0I1, P46940, A0A0D9SF70, A9UK01, H3BPZ1, A1A4S6, H0Y638, P46060, Q52LW3, Q4LE74, X5D7Q2, B4E0W3, Q59EH0, Q5T123, Q8WU79, Q5VZB4, Q9Y6D6, B4DTL8, B2RUU3, A0A0C4DGN6, Q05BX6, P01023, A8K103, F8W9Y7, Q9NRY4, H0Y465, D6RBS5, B4DLZ1, A2RQD7, E7ESY0, P11274, A7KAX9, Q15042, B4DIC3, A0A0A0MSK6,…	0.175489	0.491294	0.0142857
GO:0015711	organic anion transport	P	1	70	17	6210	0.0588235	0.0112721	over	Q9BYH2	A0A1B0GW76, P28288, Q8NCD8, A0A0A0MTB0, A0A0K2BMD8, P50416, Q01650, R4GMX5, D3DTY0, P53007, A0A024R0Y2, Q659F8, Q59GY6, O60488, C9JZL5, H0YF42, B3VL17, Q96T46, Q92536, A8K132, P07996, A8K237, Q8N3P5, B3KMV8, Q53GR7, B3KM58, Q9NRX5, D6RIZ4, P17516, B3KNH1, F6KPG5, A0A1B0GTB8, A8K6H9, J3QRU4, Q9UBX3, B5M450, B2R7N6, B4DLN1, Q13136, Q96RG4, Q15758, M0R106, O43772, P31751, A0A0S2Z3V0, I3L4X2, B2R921,…	0.175489	0.491294	0.0142857
GO:0042773	ATP synthesis coupled electron transport	P	1	70	17	6210	0.0588235	0.0112721	over	Q9UDW1	P31930, O75306, Q7KZN9, E5DZN4, K9J7I2, Q9UEH5, O43678, F8WAS3, B4DEZ3, Q9UDW1, P13073, Q8N183, O14949, P22695, P24311, P20674, Q567R0, P10606, O95168, Q8TBT6, R4GN43, P14927, P28331, Q9UI09, O14561, P14406, O43920, C9JFR7, O95167, O75380, Q5JTJ3, F5GYJ5, P47985, E9PKH6, Q9BTT5, F1B5L2, P09669, C9JKQ2, A0A059QFD5, Q96DP0, O75489, O00483, P14854, O95298, P17568, Q59F44, D3DNS1, E2CZ46, D6R9Z7, A0A…	0.175489	0.491294	0.0142857
GO:0042775	mitochondrial ATP synthesis coupled electron transport	P	1	70	17	6210	0.0588235	0.0112721	over	Q9UDW1	P31930, O75306, Q7KZN9, E5DZN4, K9J7I2, Q9UEH5, O43678, F8WAS3, B4DEZ3, Q9UDW1, P13073, Q8N183, O14949, P22695, P24311, P20674, Q567R0, P10606, O95168, Q8TBT6, R4GN43, P14927, P28331, Q9UI09, O14561, P14406, O43920, C9JFR7, O95167, O75380, Q5JTJ3, F5GYJ5, P47985, E9PKH6, Q9BTT5, F1B5L2, P09669, C9JKQ2, A0A059QFD5, Q96DP0, O75489, O00483, P14854, O95298, P17568, Q59F44, D3DNS1, E2CZ46, D6R9Z7, A0A…	0.175489	0.491294	0.0142857
GO:0003677	DNA binding	F	3	537	17	6210	0.176471	0.0864734	over	B4DXI2, A0A1B0GVI7, Q96AE4	Q92618, P05204, P06899, A0A024R3R5, Q8N108, P67809, Q7L9B9, Q9UBB5, O00268, A0A0A0MSQ3, Q562L9, E7ETD6, B4DEA3, A8K2R3, F8W038, Q9BQ69, Q9H4L7, H0Y6H0, I3VM54, B2RAI2, E9PGT1, P16104, Q5JTV1, B2R8X4, H0UI99, Q99598, A0A0C4DGV9, Q2VIN3, A8K6Y1, O15405, C9J7T7, P10809, Q9ULX6, O15525, A8K3S0, B4E0X8, P27694, A8K103, Q9UKV8, Q86SY9, B4DMT1, A8MX75, Q9NYF8, A0A024R5X6, Q9NRY4, B4DLR3, A0A024RAP0, B4E…	0.177146	0.491294	0.00558659
GO:0098803	respiratory chain complex	C	1	71	17	6210	0.0588235	0.0114332	over	Q9UDW1	P31930, O75306, Q7KZN9, K9J7I2, E5DZN4, Q9UEH5, O43678, F8WAS3, B4DEZ3, Q9UDW1, P13073, O14949, H7C492, P24311, P20674, Q567R0, P10606, H3BPJ9, O95168, R4GN43, P28331, P14927, Q9UI09, O14561, P14406, O43920, O95167, O75380, Q5JTJ3, P47985, E9PKH6, Q9BTT5, F1B5L2, C9JKQ2, P09669, Q96DP0, A0A059QFD5, O75489, O00483, P14854, O95298, Q6IAQ2, P17568, D3DNS1, Q59F44, P31040, E2CZ46, D6R9Z7, A0A097Q0T5,…	0.177772	0.491294	0.0140845
GO:0034645	cellular macromolecule biosynthetic process	P	7	1754	17	6210	0.411765	0.282448	over	K7ER90, B4DXI2, B4DUP5, A0A1B0GVI7, Q5JSB5, Q96AE4, Q4G148	Q0VGA5, B2RAH5, B2RAH2, Q68E09, H3BT57, Q68E01, Q8N3U4, A8K2R3, B4DMQ7, Q92974, B2R506, A0A024R669, D6RBL4, Q9H4L7, H0Y6H0, B4DVD6, C8C069, Q8NDV7, P0CJ79, B3KY11, B2RAI2, Q96EB1, P62487, B2R8X4, A8K6Y1, A0A0A8K8C0, Q9Y285, O15405, Q96EB6, Q6NUM7, B4DMT5, P27694, Q9UKV8, Q86SY9, B4DMT1, A0A024R5X6, A0A087WZT0, Q5T6Z8, Q9Y295, Q6MZZ4, Q8N442, A8K2T5, K7EKI4, P26358, F8WFB0, Q59EJ8, Q9BQ48, C9JCN8,…	0.177875	0.491294	0.00399088
GO:1902679	negative regulation of RNA biosynthetic process	P	2	283	17	6210	0.117647	0.0455717	over	B4DXI2, A0A1B0GVI7	Q9H7S9, Q96LA8, Q8N108, B5BTZ6, Q9UBB5, Q53RD8, A5YKK6, E7ETD6, H3BT57, A8K2R3, P27348, B3KM81, Q13363, P38919, Q15545, P62805, H0YLC5, Q3SY98, C8C069, B3KRT9, B2RAI2, E7ES08, E9PQX9, O75381, A0A0C4DFT3, H0UI99, Q6NX55, A8K6Y1, C9J7T7, J3QR41, Q96EB6, Q2MJK0, Q96IZ0, Q59FM7, Q9NYF8, Q9NRY4, O75367, Q99471, K7EIU4, H6TXS1, Q5T5X7, H0Y589, V9GY66, E9PMQ6, C9JRJ5, B4DXI2, B3KUJ5, Q01105, P17096, Q9U…	0.180033	0.491294	0.00706714
GO:1905475	regulation of protein localization to membrane	P	1	72	17	6210	0.0588235	0.0115942	over	Q5JSB5	H7C488, Q5JSB5, H0YJL5, A0A087WY71, Q86YS7, Q5VV41, B2R7D7, Q96L51, Q96HI4, P63244, P63167, P61981, P63000, P27986, P27348, Q04917, Q5F2F8, A0A0C4DGE4, Q9BV40, Q9UNK0, O43521, Q01082, A8K3B6, P84095, A0A0C4DFT3, H3BPW1, A0A0S2Z3D2, O15400, Q9BXH1, B2RCZ4, P50395, B4DQX8, Q13136, Q9UN37, B3KN05, B3KN04, P33176, Q12846, A6NCW0, P31751, Q5T6Z8, B7Z3E5, C9JZB0, Q86YQ0, A8K4G7, B5BUB8, Q00610, Q99828,…	0.180049	0.491294	0.0138889
GO:0034599	cellular response to oxidative stress	P	1	72	17	6210	0.0588235	0.0115942	over	Q16678	Q9UL15, P23396, P0DMV9, Q6NUK1, A8K525, P10599, Q96C36, Q2VF42, P30048, Q8TCS8, P63244, B4DF70, Q5JR08, H3BT57, Q2TAM5, Q13162, Q15262, P61586, A0A0S2Z4I4, P07237, B4DK69, B4DR80, Q16678, A6NGV6, Q07820, P17516, H0Y953, V9HW25, B2R6X6, K7ENT6, C9JAX1, P67936, Q96EB6, Q969S3, P06753, Q8NBY1, B4DZZ0, J3KNF4, E7D7X9, B3KNI2, H0Y3Z3, A2RQD7, B3KVL0, V9HW35, P08581, Q7Z333, Q15120, A0A0S2Z4G4, A0A0A0M…	0.180049	0.491294	0.0138889
GO:0051171	regulation of nitrogen compound metabolic process	P	6	1436	17	6210	0.352941	0.23124	over	K7ER90, B4DXI2, A0A1B0GVI7, B4DUP5, Q5JSB5, Q96AE4	B2RAH5, Q9NQU5, Q9BRZ2, O00148, B2RAH2, Q68E09, Q8TDD1, H3BV98, H3BT57, E7ETD6, Q53S54, Q8N3U4, B3KRB7, H0YN81, A8K2R3, B4DII5, Q92974, E7EMW7, B2R506, B4DL02, A0A024R669, A8K4T6, A0A024R5U7, D6RBL4, Q9H4L7, H0Y6H0, Q5VTR2, S4R3H4, C8C069, Q8NDV7, E9PGT3, P0CJ79, B2RAI2, F8VZJ2, B3KY11, P16104, P51116, O60216, B1APR7, Q96EB1, A0A0C4DFT3, P62487, B2R8X4, Q8WXA9, Q2VIN3, Q6NX55, A8K6Y1, A0A0A8K8C0,…	0.180052	0.491294	0.00417827
GO:0044770	cell cycle phase transition	P	2	285	17	6210	0.117647	0.0458937	over	B4DXI2, Q5JSB5	I3L4A2, Q14204, O43670, Q96GX5, Q9UPN1, Q5JSB5, Q53SF4, B2RAH5, A5YKK6, O60566, B3KUH0, F8VYH9, Q9BVA1, Q53S54, P43034, P22694, Q9ULW0, E9PNQ9, Q9C0C2, D6RHI7, A8K4T6, Q12834, Q4ZG57, B2R7E8, F5H1D6, E5RFJ8, Q2MJK0, Q9ULX6, P27694, Q86SY9, Q13257, A0A024R4V8, A8MX75, Q3ZCM7, A0A024RB10, O75367, Q9NQW6, P35998, K7EIU4, H0Y589, Q6PJQ8, Q9P119, Q9NY65, B4DXI2, A8K4G7, Q16531, P40306, A8K9A5, P61289,…	0.18202	0.491995	0.00701754
GO:1903747	regulation of establishment of protein localization to mitochondrion	P	1	73	17	6210	0.0588235	0.0117552	over	Q5JSB5	H0YNH5, P54652, P0DMV9, B3KS40, J3KND6, B2RA34, Q5JSB5, A0A0A0MQU3, O75063, Q96HI4, P63167, P61981, P63000, A0A075B784, P27348, A8K132, A8K330, Q04917, B5BU25, Q5F2F8, Q01081, O43521, Q9UII2, O96019, B3KM58, P19784, A0A024R9U8, A0A140TA28, F8WCQ4, P11142, B3KSM6, E9PPR2, Q9Y3B1, B2R6X5, E7EU96, Q5U0B3, P49841, Q9BXH1, P46779, A0A087X1T2, B3KN04, O95376, Q86YQ0, B4DWC1, A0A0C4DG44, Q6P096, B5BUB8,…	0.18232	0.491995	0.0136986
GO:1901991	negative regulation of mitotic cell cycle phase transition	P	1	73	17	6210	0.0588235	0.0117552	over	Q5JSB5	I3L4A2, O43670, Q6P1J9, A6H8Y5, Q71UM5, A0A0D9SEY7, Q5JSB5, Q96K76, P14635, O43715, A5YKK6, Q96L51, Q9Y6G9, O60566, Q9UH60, H0YNU5, A8K097, Q5QPD4, H0Y9C1, E9PKG1, Q9C0C2, A0A0S2Z3I0, Q13564, P06748, B3KM57, P33981, Q7Z5X8, P19784, B7Z6J7, B2R7E8, Q9H9A5, P20248, Q9UKZ1, Q07812, P12270, E7EU96, Q05D30, F8VV52, Q9Y6D9, B2RE59, Q09472, Q13257, H6WA46, P30307, A0A024RB10, P78527, K7EIU4, Q9P119, B2R…	0.18232	0.491995	0.0136986
GO:0070469	respiratory chain	C	1	74	17	6210	0.0588235	0.0119163	over	Q9UDW1	P31930, O75306, Q7KZN9, K9J7I2, E5DZN4, Q9UEH5, O43678, F8WAS3, Q96CP5, B4DEZ3, Q9UDW1, P13073, O14949, P22695, H7C492, P24311, Q567R0, P20674, P10606, H3BPJ9, O95168, R4GN43, P28331, P14927, Q9UI09, O14561, P14406, O43920, O95167, O75380, Q5JTJ3, P47985, E9PKH6, Q9BTT5, F1B5L2, C9JKQ2, P09669, Q96DP0, A0A059QFD5, O75489, O00483, P14854, O95298, Q6IAQ2, P17568, D3DNS1, Q59F44, P31040, E2CZ46, D6R…	0.184585	0.492673	0.0135135
GO:0072593	reactive oxygen species metabolic process	P	1	74	17	6210	0.0588235	0.0119163	over	Q16678	O43474, P07900, Q92538, P18085, A0A0K2BMD8, B7UCU6, B4DDT3, A0A0C4DFU1, P30048, B4DEZ3, B4DF70, P63000, P04040, Q13162, Q5T6L6, Q9BSK2, B3VL17, H3BN55, Q96T46, P07996, A8K132, B4DK69, Q2QL34, H0Y7N1, A1X283, Q16678, P28331, B3KM58, P17516, O75052, F8WCQ4, A0A087X1J7, H0YNX7, B2R9V7, C9J1Z8, J3KNF4, Q9Y2Y8, O75489, P31751, O94760, H6TXS1, Q9NY61, P16435, A0A087WUQ6, V9HW35, B2R7W7, B4DT46, P61204,…	0.184585	0.492673	0.0135135
GO:1990204	oxidoreductase complex	C	1	74	17	6210	0.0588235	0.0119163	over	Q9UDW1	P31930, O75306, P08559, A0A0D9SFS3, K9J7I2, B4DFL1, Q9UEH5, H0YMB3, O43678, F8WAS3, B4DJX1, B4DEZ3, Q9UDW1, O14949, H7C492, P07237, Q567R0, Q53T76, H3BPJ9, O95168, R4GN43, P28331, P14927, Q9UI09, O14561, O43920, Q6QN92, P11177, O95167, Q96HY7, O75380, P11182, B2R673, B4E2N3, P47985, E9PKH6, Q8N335, Q9BTT5, F1B5L2, C9JKQ2, Q96DP0, O75489, O00483, O95298, Q6IAQ2, P17568, D3DNS1, H0Y3Z3, P31040, E2C…	0.184585	0.492673	0.0135135
GO:0000981	RNA polymerase II transcription factor activity, sequence-specific DNA binding	F	1	75	17	6210	0.0588235	0.0120773	over	A0A1B0GVI7	P78545, O43474, E7EX78, Q9UKL0, P67809, K7ENH8, Q75MR3, M0R205, B5BTZ6, A0A024RAV4, C9J7K9, C9JWJ8, P19532, Q9NX63, P42224, B2R5U7, Q01167, H0YG25, A0A1B0GVI7, E5KSX8, Q5XKR4, P17275, F1DAL7, Q2TAM5, P16383, P85037, C9JUJ0, Q6P1N0, B4DUQ1, H0Y5N4, P22670, A6NGV6, Q96I24, A0A024R9Q8, Q96F89, X5DRF3, B2RAI2, P55316, Q99557, Q59G74, Q2NLD4, B2R8X4, H0UI99, Q6FI30, B4E1P2, A4D1Z4, O15525, A0A087X1T2,…	0.186844	0.495704	0.0133333
GO:0022900	electron transport chain	P	1	76	17	6210	0.0588235	0.0122383	over	Q9UDW1	P31930, O75306, Q7KZN9, K9J7I2, E5DZN4, Q9UEH5, O43678, F8WAS3, B4DEZ3, Q9UDW1, Q8N183, P13073, O14949, P22695, P24311, Q567R0, P20674, P10606, O95168, Q8TBT6, R4GN43, B3KMV8, P14927, P28331, Q53GR7, Q9UI09, O14561, P14406, O43920, C9JFR7, O95167, P38117, O75380, Q5JTJ3, F5GYJ5, P47985, E9PKH6, Q9BTT5, F1B5L2, C9JKQ2, P09669, Q96DP0, A0A059QFD5, P13804, O75489, O00483, P14854, O95298, P17568, D3D…	0.189097	0.495704	0.0131579
GO:1901988	negative regulation of cell cycle phase transition	P	1	76	17	6210	0.0588235	0.0122383	over	Q5JSB5	I3L4A2, O43670, Q6P1J9, A6H8Y5, Q71UM5, A0A0D9SEY7, Q5JSB5, Q96K76, P14635, O43715, A5YKK6, Q96L51, O60566, Q9Y6G9, Q9UH60, H0YNU5, A8K097, Q5QPD4, H0Y9C1, E9PKG1, Q9C0C2, A0A0S2Z3I0, Q13564, P06748, B3KM57, P33981, Q7Z5X8, P19784, B7Z6J7, B2R7E8, Q9H9A5, P20248, Q9UKZ1, Q07812, P12270, E7EU96, Q05D30, F8VV52, Q9Y6D9, B2RE59, Q09472, Q13257, H6WA46, P30307, B3KY60, A0A024RB10, O75367, P78527, K7E…	0.189097	0.495704	0.0131579
GO:0022804	active transmembrane transporter activity	F	1	76	17	6210	0.0588235	0.0122383	over	Q9BYH2	Q69YM4, P30049, Q8NCD8, P28288, A0A024RBC7, O75348, Q16864, P16615, P36543, P38606, Q01650, Q59G44, B3KXW8, D3DTY0, Q8NE86, B2RAH2, Q59GY6, Q659F8, Q96T83, I3L1P8, C9JZL5, P60059, Q59GD7, Q9H7F0, Q92536, B3KR70, F5H7U2, P48047, B3KW93, Q9Y2D2, H0Y953, H0YMQ9, B3KSN3, Q6QWC0, Q86VL8, G3V2S6, B4DPL8, P54709, P05141, B2R7N6, B5M450, Q8N697, P05023, P05026, B4DL14, A8K787, B4DHV9, Q15758, B3KVU0, M0R…	0.189097	0.495704	0.0131579
GO:0022904	respiratory electron transport chain	P	1	76	17	6210	0.0588235	0.0122383	over	Q9UDW1	P31930, O75306, Q7KZN9, E5DZN4, K9J7I2, Q9UEH5, O43678, F8WAS3, B4DEZ3, Q9UDW1, P13073, Q8N183, O14949, P22695, P24311, P20674, Q567R0, P10606, O95168, Q8TBT6, R4GN43, B3KMV8, P14927, P28331, Q53GR7, Q9UI09, O14561, P14406, O43920, C9JFR7, O95167, P38117, O75380, Q5JTJ3, F5GYJ5, P47985, E9PKH6, Q9BTT5, F1B5L2, P09669, C9JKQ2, A0A059QFD5, Q96DP0, P13804, O75489, O00483, P14854, O95298, P17568, Q59…	0.189097	0.495704	0.0131579
GO:0010564	regulation of cell cycle process	P	2	293	17	6210	0.117647	0.047182	over	B4DXI2, Q5JSB5	I3L4A2, O43670, Q5JSB5, A5YKK6, B4DIZ6, O00148, K7ELY9, A0A0A0MSQ3, Q8WWQ0, O60566, Q5JR08, F8VYH9, Q53S54, Q8N3U4, Q9BQG0, Q9ULW0, Q9BSK2, H7C331, Q9C0C2, A8K4T6, Q16512, Q12834, Q16513, B2R7E8, Q9NYV4, P14174, J3QR41, Q15554, Q13257, A0A024R4V8, A8MX75, A0A024RB10, O75367, B0AZQ4, Q9NQW6, P35998, H6TXS1, K7EIU4, Q9P119, A8K4G7, B4DXI2, A0A024R5H8, Q16531, Q9NQG5, P40306, P61289, B4DL06, E5RK09,…	0.190008	0.49632	0.00682594
GO:0048514	blood vessel morphogenesis	P	1	79	17	6210	0.0588235	0.0127214	over	Q16678	O43474, F6R503, M0QY43, P19174, P12259, Q53SF4, Q53TD0, Q96BN8, O75340, P52799, Q9NS00, Q969H8, P35579, P35580, P42224, B2R7U4, A0A024RAR8, Q5JR08, H3BT57, P61586, P05771, P07355, B1N7G7, P07996, B4DL02, C9J185, H0Y5N4, Q16678, Q9UII2, P12429, A0A024R9Q8, A0A169TED2, B4DH43, B4DJ85, A0A024R3E0, P19338, Q9BZL6, B4DTL8, B2R8X4, A0A087X1F5, M0QXF7, Q96L35, B4DVP5, I3L425, A0A024RC87, A5YM53, Q96EB6,…	0.195822	0.509692	0.0126582
GO:0000077	DNA damage checkpoint	P	1	80	17	6210	0.0588235	0.0128824	over	Q5JSB5	A6H8Y5, Q71UM5, Q5JSB5, O75663, Q13838, C9J8E1, P14635, O43715, A5YKK6, Q96L51, O00148, O60921, O60885, M0QXG9, Q9UH60, H0YNU5, B3KTJ9, Q5QPD4, P49137, H0Y9C1, E9PKG1, Q9C0C2, A8K710, A0A0S2Z3I0, P06748, B3KM57, Q13769, B2R8K8, Q7Z5X8, B7Z6J7, B2R7E8, P16104, A0A024R307, Q9H9A5, P20248, Q9UKZ1, Q07812, A0PJ48, Q9NVH2, Q99638, Q05D30, F8VV52, B2RE59, Q09472, P30307, Q13535, B3KY60, A0A024RB10, P78…	0.198051	0.511865	0.0125
GO:0010822	positive regulation of mitochondrion organization	P	1	80	17	6210	0.0588235	0.0128824	over	Q5JSB5	H0YNH5, P54652, P0DMV9, B3KS40, J3KND6, Q5JSB5, A0A0A0MQU3, O75063, K7ELY9, Q96HI4, P63167, P61981, P63000, A0A075B784, P27348, A8K132, A8K330, Q04917, B5BU25, Q5F2F8, Q01081, O43521, O96019, B3KM58, P19784, A0A024R9U8, A0A140TA28, P11142, B3KSM6, E9PPR2, Q9Y3B1, B3KRK7, B2R6X5, Q07812, E7EU96, Q5U0B3, P49841, Q9BXH1, P46779, A0A087X1T2, F8W7Q4, B3KN04, O95376, Q86YQ0, B4DWC1, A0A0C4DG44, Q6P096,…	0.198051	0.511865	0.0125
GO:0007093	mitotic cell cycle checkpoint	P	1	81	17	6210	0.0588235	0.0130435	over	Q5JSB5	I3L4A2, O43670, A6H8Y5, Q71UM5, Q5JSB5, A0A024RAV5, P14635, O43715, A5YKK6, Q96L51, O60921, Q9Y6G9, O60566, Q9UH60, H0YNU5, A8K097, Q68E01, Q5QPD4, H0Y9C1, Q14014, E9PKG1, Q9C0C2, P01111, A0A0S2Z3I0, Q13564, P06748, B3KM57, P33981, Q7Z5X8, P19784, B7Z6J7, B2R7E8, Q9H9A5, P20248, P50748, Q9UKZ1, Q07812, P12270, E7EU96, A0A0S2Z3D2, Q05D30, F8VV52, Q9Y6D9, B2RE59, Q09472, Q13257, P30307, A0A024RB10,…	0.200275	0.513994	0.0123457
GO:0044272	sulfur compound biosynthetic process	P	1	81	17	6210	0.0588235	0.0130435	over	Q4G148	Q9Y305, P08559, B4DFL1, B4DEN5, B4E0R0, O75223, Q2NLC8, Q499Z2, A7E261, B4DJX1, D6RF87, P50897, P53007, A0A024R0Y2, B2R983, O60488, B4DV28, Q8NCH0, Q9H1B5, P09211, P10768, Q6NUL1, A0A087X243, O14880, O00154, P11177, Q9ULC5, B2R673, B5MCK8, P49327, B4E2J2, P48637, A0A087X1B8, Q6Y1H2, Q5T1C6, O00767, O43252, Q8WXI4, Q9H7Q4, A8K987, P31153, B3KN05, Q8WUX2, Q53GQ0, B3KVY9, P51884, P48507, A8K7A4, Q9N…	0.200275	0.513994	0.0123457
GO:0006355	regulation of transcription, DNA-templated	P	4	861	17	6210	0.235294	0.138647	over	B4DXI2, A0A1B0GVI7, Q5JSB5, Q96AE4	B2RAH5, Q9NQU5, B2RAH2, O00148, Q68E09, E7ETD6, H3BT57, A8K2R3, B3KRB7, H0YN81, B2R506, Q92974, A0A024R669, Q9H4L7, H0Y6H0, Q5VTR2, C8C069, E9PGT3, F8VZJ2, B2RAI2, P0CJ79, O60216, Q96EB1, A0A0C4DFT3, B2R8X4, Q2VIN3, Q6NX55, A8K6Y1, A0A0A8K8C0, J3QR41, O15405, Q96EB6, A8K103, Q9UKV8, B4DMT1, A0A024R5X6, H6TXS1, A0A087WZT0, B3KVL0, B4DXI2, C9JRJ5, H0YJ25, Q6MZZ4, A8K9A5, B4DL06, A8K2T5, P63104, P62…	0.201354	0.514961	0.00464576
GO:0010608	posttranscriptional regulation of gene expression	P	2	308	17	6210	0.117647	0.0495974	over	K7ER90, B4DUP5	P36507, Q92615, O75822, Q9BW34, P67809, B5BTZ6, C9J8E1, P35658, A5YKK6, O00148, Q9UBS0, H3BV98, H3BT57, Q92973, P49137, P07996, C9J185, P38919, A8K4T6, B7ZKK7, D6RBL4, Q5ZEY3, P13639, H0YME5, E7EUU4, Q53TG4, A0A169TED2, P41091, Q8NDV7, E9PGT3, P51116, P68104, A8K3B8, Q9UI10, D6RGF0, Q9NPD3, P20042, C9J7T7, B4DMT5, Q9UKV8, Q9Y2Y8, Q16768, B4DLR3, A0A024R7L5, P35998, O95453, C9JRJ5, Q01105, P40429,…	0.205133	0.517002	0.00649351
GO:0009059	macromolecule biosynthetic process	P	7	1822	17	6210	0.411765	0.293398	over	K7ER90, B4DXI2, B4DUP5, A0A1B0GVI7, Q5JSB5, Q96AE4, Q4G148	Q0VGA5, B2RAH5, B2RAH2, Q68E09, H3BT57, Q68E01, B4DEA3, Q8N3U4, A8K2R3, B4DMQ7, Q92974, B2R506, A0A024R669, D6RBL4, Q9H4L7, H0Y6H0, B4DVD6, C8C069, Q8NDV7, P0CJ79, B3KY11, B2RAI2, Q96EB1, P62487, B2R8X4, A8K6Y1, A0A0A8K8C0, Q9Y285, O15405, Q96EB6, Q6NUM7, B4DMT5, P27694, Q9UKV8, Q86SY9, B4DMT1, A0A024R5X6, A0A087WZT0, Q5T6Z8, Q9Y295, Q6MZZ4, Q8N442, A8K2T5, K7EKI4, P26358, F8WFB0, Q59EJ8, Q9BQ48,…	0.206349	0.517002	0.00384193
GO:0005085	guanyl-nucleotide exchange factor activity	F	1	84	17	6210	0.0588235	0.0135266	over	B4DUP5	A0A0A0MRB5, Q5VZ89, Q9H2M9, Q92538, O95714, M0QZS0, P18085, B5MDV5, F8W9S7, Q5VV41, A1L390, Q68E09, D6R938, H0YFI1, B7ZVX0, B2RDW0, Q53FH6, C9JAB9, Q92974, B4DL02, P49770, O95248, B4DJ05, Q9Y2L1, H0Y7N4, Q5JVZ8, Q53TG4, Q01082, H0YGE5, B4DGW2, B7Z4F4, B4E3H4, H0YAN8, Q9Y6D6, Q9Y6D5, B4DVP5, Q53TK4, B2RUU3, Q9UI10, B3KUE2, Q92888, Q15751, E5RIH3, Q9HCU5, H7C2S1, Q9Y2Q5, O15020, C9J1Z8, Q13813, Q96…	0.206913	0.517002	0.0119048
GO:0031570	DNA integrity checkpoint	P	1	84	17	6210	0.0588235	0.0135266	over	Q5JSB5	A6H8Y5, Q71UM5, Q5JSB5, O75663, Q13838, C9J8E1, P14635, O43715, A5YKK6, Q96L51, O00148, O60921, O60885, M0QXG9, Q9UH60, H0YNU5, B3KTJ9, Q5QPD4, P49137, H0Y9C1, E9PKG1, Q9C0C2, A8K710, O75419, A0A0S2Z3I0, Q13564, P06748, B3KM57, Q13769, B2R8K8, Q7Z5X8, B7Z6J7, B2R7E8, P16104, A0A024R307, Q9H9A5, P20248, Q9UKZ1, Q07812, A0PJ48, Q9NVH2, Q99638, Q05D30, F8VV52, B2RE59, Q09472, P30307, Q13535, B3KY60,…	0.206913	0.517002	0.0119048
GO:0042393	histone binding	F	1	84	17	6210	0.0588235	0.0135266	over	B4DXI2	Q96LA8, Q59GI3, F5GWX5, Q6ZMT4, O43159, B4DZC0, Q8WWQ0, A0A0A0MSQ3, O60885, Q96T88, B4DS09, X5CF57, A6NNK5, Q15020, P45973, Q9HC52, P05771, Q12873, A0A0C4DGI9, Q53F35, Q9Y232, P06748, Q16512, Q9UFC0, P62805, B3KS10, F8WCV1, Q5VTR2, A0A169TED2, H0YN26, Q9H7Z6, P16104, J3QQW9, A4LAA3, B3KNC3, B4DYZ9, P42695, A8K245, Q96EB6, R9WQY1, Q9NXD3, B3KMS0, Q05DG0, Q5TEC6, O95696, W5ZQ92, B4DEL2, A0A024R895,…	0.206913	0.517002	0.0119048
GO:1903506	regulation of nucleic acid-templated transcription	P	4	872	17	6210	0.235294	0.140419	over	B4DXI2, A0A1B0GVI7, Q5JSB5, Q96AE4	B2RAH5, Q9NQU5, B2RAH2, O00148, Q68E09, E7ETD6, H3BT57, A8K2R3, B3KRB7, H0YN81, B2R506, Q92974, A0A024R669, Q9H4L7, H0Y6H0, Q5VTR2, C8C069, E9PGT3, F8VZJ2, P0CJ79, B2RAI2, O60216, Q96EB1, A0A0C4DFT3, B2R8X4, Q2VIN3, Q6NX55, A8K6Y1, A0A0A8K8C0, J3QR41, O15405, Q96EB6, A8K103, Q9UKV8, B4DMT1, A0A024R5X6, A0A087WZT0, H6TXS1, B3KVL0, B4DXI2, C9JRJ5, H0YJ25, Q6MZZ4, A8K9A5, B4DL06, A8K2T5, P63104, P62…	0.207854	0.517002	0.00458716
GO:0030695	GTPase regulator activity	F	1	85	17	6210	0.0588235	0.0136876	over	Q05BX6	B2RE34, Q9H2M9, B3KRW4, F6R503, Q9BST9, B2R6F5, B4DE53, A0A024R637, I3L412, Q68EM7, Q59E87, B2RWP0, Q96P48, B4DHC5, B4E0I1, P46940, A0A024RAJ8, A0A0D9SF70, A9UK01, H3BPZ1, A1A4S6, H0Y638, P46060, Q52LW3, Q4LE74, X5D7Q2, B4E0W3, A0A0A0MRC4, Q59EH0, Q5T123, Q3SY98, B4DRL9, Q8WU79, Q5VZB4, Q9Y6D6, B4DTL8, A0A096LP07, B2RUU3, A0A0C4DGN6, C9JFE4, Q05BX6, J3KTF8, P01023, P50395, A8K103, F8W9Y7, Q9NRY4,…	0.209114	0.517002	0.0117647
GO:0050900	leukocyte migration	P	1	85	17	6210	0.0588235	0.0136876	over	Q9BYH2	A8K0I0, Q92538, B4DLX6, O14672, Q86TY5, P19174, Q8N9M5, Q12904, P12931, Q01650, B4DDT3, R4GMX5, P39019, B2R7U4, Q16393, P23229, P63000, P04083, Q92896, Q14014, P27986, A8K651, Q92536, P07996, P01111, Q14451, B4DL02, P78536, Q5JRA6, B4E2B8, E7ES08, A0A0S2Z3Y4, P84095, P40199, P14174, Q5T0V2, P54709, A5YM53, P42338, A8K486, B7Z454, P02751, Q9HCY8, P05026, P09429, A0A0U1RQV4, M0R308, B4E1V1, M0QYW5,…	0.209114	0.517002	0.0117647
GO:0051253	negative regulation of RNA metabolic process	P	2	312	17	6210	0.117647	0.0502415	over	B4DXI2, A0A1B0GVI7	Q9H7S9, Q96LA8, Q8N108, B5BTZ6, Q9UBB5, Q53RD8, A5YKK6, E7ETD6, H3BT57, A8K2R3, P27348, B3KM81, Q13242, Q13363, P38919, Q15545, P62805, H0YLC5, Q5VTR2, Q3SY98, S4R3H4, C8C069, B3KRT9, E7ES08, B2RAI2, E9PQX9, O75381, A0A0C4DFT3, H0UI99, Q6NX55, A8K6Y1, C9J7T7, J3QR41, Q96EB6, Q2MJK0, Q96IZ0, Q59FM7, Q9NYF8, Q9NRY4, O75367, Q99471, K7EIU4, H6TXS1, Q5T5X7, H0Y589, V9GY66, E9PMQ6, P18615, C9JRJ5, B4D…	0.209195	0.517002	0.00641026
GO:0043413	macromolecule glycosylation	P	1	86	17	6210	0.0588235	0.0138486	over	Q4G148	Q9H5K3, Q05BM8, Q7Z7M9, P18085, B4DEN5, B3KP69, Q9H488, O95394, A0A024R3J7, Q86TM6, Q499Z2, Q9NS00, H7C4I6, Q9NYU1, Q9NYU2, A0A0C4DGS1, Q9H0U3, O60762, Q9Y2C3, A0A024R7F1, A0A0C4DGS5, S4R350, Q58A70, Q9Y6X1, P55072, Q9BZQ6, P07996, O15294, P04843, B2RE46, P49257, Q13724, Q8NAT1, B4DUF8, Q8TCJ2, Q9UKM7, B3KSN1, Q9H3R2, B7Z5C5, D3DQI7, Q9Y6D6, Q86SF2, Q9HC07, Q9HC03, A0A087WUD3, B2R758, Q96EB6, Q15…	0.211309	0.517002	0.0116279
GO:0038023	signaling receptor activity	F	1	86	17	6210	0.0588235	0.0138486	over	A0A1B0GVI7	Q9NQ84, Q53SF4, B4DDT3, A0A1B0GVI7, F1DAL7, C9JVH3, Q14571, H7C134, H3BMT2, Q14573, B1N7G7, O15173, A8K556, P08727, A0A087WU84, K7EKE8, N1NSB5, B7Z4F4, B4DE20, Q96F46, P20645, Q96L35, A0A0U1RRH1, B4DVP5, B4E2J5, A5YM53, Q59EC6, P22466, E9PP15, B4E336, G9BXQ3, A0A1B0GUR5, Q8IWU2, P08779, Q59EG2, Q8IVS6, M0R266, A0A024R3H2, A8KAQ3, P31431, O43813, A6NL08, P08581, A0A0S2A5C8, B4DKC3, A0A126GVT4, Q9N…	0.211309	0.517002	0.0116279
GO:0098800	inner mitochondrial membrane protein complex	C	1	86	17	6210	0.0588235	0.0138486	over	Q9UDW1	P30049, B4DJ38, O75947, O75306, A0A059S4M9, K9J7I2, Q9UEH5, O43678, F8WAS3, Q8NE86, Q9NX63, B4DEZ3, Q9UDW1, P31939, H7C492, H3BPJ9, O95168, R4GN43, A0A0A6YYL4, P48047, P28331, P14927, Q9UII2, Q9UI09, B9A067, Q9BRQ6, A0A097PY54, O14561, O43920, O95167, B4E2B5, O75380, Q5QNZ2, S4R3D7, Q9NWR8, P05141, E9PKH6, A0A096WXL7, E9PN17, Q9BTT5, F1B5L2, B4DL14, A8K787, J3KRJ3, C9JKQ2, Q96DP0, H7C1U8, Q3ZCQ8,…	0.211309	0.517002	0.0116279
GO:0006486	protein glycosylation	P	1	86	17	6210	0.0588235	0.0138486	over	Q4G148	Q9H5K3, Q05BM8, Q7Z7M9, P18085, B4DEN5, B3KP69, Q9H488, O95394, A0A024R3J7, Q86TM6, Q499Z2, Q9NS00, H7C4I6, Q9NYU1, Q9NYU2, A0A0C4DGS1, Q9H0U3, O60762, Q9Y2C3, A0A0C4DGS5, A0A024R7F1, S4R350, Q58A70, Q9Y6X1, P55072, Q9BZQ6, P07996, O15294, P04843, B2RE46, P49257, Q13724, Q8NAT1, B4DUF8, Q8TCJ2, Q9UKM7, B3KSN1, Q9H3R2, B7Z5C5, D3DQI7, Q9Y6D6, Q86SF2, Q9HC07, Q9HC03, A0A087WUD3, B2R758, Q96EB6, Q15…	0.211309	0.517002	0.0116279
GO:0051249	regulation of lymphocyte activation	P	1	87	17	6210	0.0588235	0.0140097	over	A0A1B0GVI7	B4DLX6, H3BLV0, K7ENH8, Q86TY5, P15529, B7ZMB3, Q53TD0, P12931, A0A0S4XQV4, Q53RD8, F6IR49, Q05209, P42345, A0A1B0GVI7, P04083, P63000, R4GN18, P27986, C9JAB9, Q495A1, U5YKD2, P27487, B4DK26, Q16512, Q53TG4, B4DJ85, N1NSB5, A0A024R3E0, P10644, E7ES08, A0A0S2Z3Y4, A8K3B6, P40199, A0A090MEX8, Q99952, P14174, P09382, D6REW1, O43290, H3BPW1, A8K5S1, Q13177, P10809, B7Z532, P09429, P00491, B3KRY3, H7B…	0.213498	0.520623	0.0114943
GO:0043235	receptor complex	C	1	88	17	6210	0.0588235	0.0141707	over	A0A1B0GVI7	M0QY43, P12814, Q9NQ84, Q53SF4, P12931, A0A0S4XQV4, Q59GU6, P35579, F6IR49, Q8WWQ0, P35580, A0A024RAR8, A0A1B0GVI7, P23229, Q9BUG9, Q9Y4G6, C9JVH3, Q14571, P27986, H7C0V9, B1N7G7, P07237, P07996, Q14573, U5YKD2, B4DL02, P78536, Q13443, K7EIE9, B4E2B8, B4DH45, C8C069, B4DE20, B7Z4F4, P40199, A0A090MEX8, Q96RT1, P46939, A0A024R8K7, B4DVP5, H0YEN6, A5YM53, A0PJ48, P10809, B4DT77, P02751, B7Z532, E9P…	0.215682	0.521557	0.0113636
GO:2001141	regulation of RNA biosynthetic process	P	4	887	17	6210	0.235294	0.142834	over	B4DXI2, A0A1B0GVI7, Q5JSB5, Q96AE4	B2RAH5, Q9NQU5, Q9BRZ2, B2RAH2, O00148, Q68E09, H3BV98, E7ETD6, H3BT57, A8K2R3, B3KRB7, H0YN81, B2R506, Q92974, A0A024R669, Q9H4L7, H0Y6H0, Q5VTR2, C8C069, E9PGT3, F8VZJ2, P0CJ79, B2RAI2, O60216, Q96EB1, P62487, A0A0C4DFT3, B2R8X4, Q2VIN3, Q6NX55, A8K6Y1, A0A0A8K8C0, J3QR41, O15405, Q96EB6, A8K103, Q9UKV8, B4DMT1, A0A024R5X6, A0A087WZT0, H6TXS1, B3KVL0, B4DXI2, C9JRJ5, H0YJ25, Q6MZZ4, A8K9A5, B4D…	0.216833	0.521557	0.00450958
GO:0070085	glycosylation	P	1	89	17	6210	0.0588235	0.0143317	over	Q4G148	Q9H5K3, Q05BM8, Q7Z7M9, P18085, B4DEN5, B3KP69, Q9H488, O95394, A0A024R3J7, Q86TM6, Q499Z2, Q9NS00, H7C4I6, Q9NYU1, Q9NYU2, A0A0C4DGS1, Q9H0U3, O60762, Q9Y2C3, A0A024R7F1, A0A0C4DGS5, S4R350, Q58A70, Q9Y6X1, P55072, Q9BZQ6, P07996, O15294, P04843, B2RE46, P49257, Q13724, Q8NAT1, B4DUF8, Q8TCJ2, Q9UKM7, B3KSN1, Q9H3R2, B7Z5C5, D3DQI7, Q9Y6D6, Q86SF2, Q9HC07, Q9HC03, A0A087WUD3, B2R758, Q96EB6, Q15…	0.21786	0.521557	0.011236
GO:0009408	response to heat	P	1	89	17	6210	0.0588235	0.0143317	over	B4DUP5	Q9UL15, H0YDD9, P54652, P07900, P0DMV9, B2RA34, B4DZG6, O75340, P35658, Q53FD7, P42345, B2R7U4, O60884, D6R938, B3KTJ9, Q9BW27, Q15185, P0DJD0, P49137, B2R7I1, P25685, B3KM81, Q8WUM0, Q96HA1, P31689, P49770, B3KTT0, Q9H078, B2R7E8, P37198, P11142, P11021, B3KSM6, Q49A72, B2R6X5, P12270, Q9UI10, E9PJB2, P49841, Q96EB6, P27694, Q96B36, Q09472, B5MC59, B4DHN0, Q13535, Q8TEM1, P57740, Q12769, B3KR49,…	0.21786	0.521557	0.011236
GO:0006119	oxidative phosphorylation	P	1	89	17	6210	0.0588235	0.0143317	over	Q9UDW1	P31930, O75306, Q7KZN9, Q16864, K9J7I2, E5DZN4, Q9UEH5, O43678, P36543, P38606, F8WAS3, A8K4I8, B4DEZ3, Q9UDW1, Q9H2U2, Q8N183, P13073, O14949, Q15181, P22695, Q9BSK2, P55072, P24311, Q567R0, P20674, B3KR70, P10606, O95168, Q8TBT6, R4GN43, P14927, P28331, Q9UI09, O14561, P14406, O43920, C9JFR7, O95167, O75380, Q5JTJ3, F5GYJ5, P47985, E9PKH6, Q9BTT5, F1B5L2, C9JKQ2, P09669, Q96DP0, A0A059QFD5, O75…	0.21786	0.521557	0.011236
GO:0043234	protein complex	C	8	2187	17	6210	0.470588	0.352174	over	Q9UDW1, K7ER90, B4DXI2, A0A1B0GVI7, B4DUP5, Q5JSB5, Q96AE4, G3V1D1	E9PJ81, O75947, A0A0K2BMD8, B2RAH5, Q8NE86, B2RAH2, H7C5G2, Q9HAF1, F5GZI3, P13073, H3BT57, Q68E01, B4DEA3, H0Y6I7, A8K2R3, B4DMQ7, K7EP07, B2R506, Q92974, A0A024R669, Q9H4L4, D6RBL4, Q9H4L7, O75934, Q12834, Q59EH0, O14561, B4DVD6, S4R3H4, Q6QN92, C8C069, H7C5H6, E9PF10, P16104, B2R514, P62487, Q96EB1, B2R8X4, P42858, Q9H0C8, A8K6Y1, P61158, Q9Y285, O15400, Q9UKV5, Q96EB6, P10809, B4DMT5, J3KRJ3,…	0.218145	0.521557	0.00365798
GO:0009628	response to abiotic stimulus	P	2	323	17	6210	0.117647	0.0520129	over	B4DUP5, A0A1B0GVI7	H0YDD9, B5MC79, Q9BW34, P10599, P35658, B2RAH2, Q96HI4, B2R7U4, Q5JR08, H3BT57, Q68E01, Q14571, Q9BW27, P0DJD0, P49137, A8K2R3, B3KM81, B4DHG3, Q8WUM0, P07996, P27487, C9J185, A0A0D9SG71, Q16512, Q16513, H0YME5, B5BTY5, C8C069, Q9Y4L1, B2R7E8, P16104, B1APR7, P42858, A0A0C4DGV9, P30519, Q9UI10, J3QR41, Q13131, Q96EB6, Q6LCB0, B2R5B6, P27694, A8MX75, A0A024RAP0, H0Y465, B4E0X0, O75367, B3KR49, Q53…	0.220419	0.525284	0.00619195
GO:0010817	regulation of hormone levels	P	1	92	17	6210	0.0588235	0.0148148	over	Q16678	H0YDD9, Q8TD43, A8K885, Q15738, P49189, H0YKF9, P05408, H3BNE1, Q9BTZ2, Q9NRW5, Q8NE86, Q02338, Q9H0U4, P05091, P04083, Q14571, P62834, P61026, E9PB90, P08842, P29966, P05771, B7Z3W6, P07355, Q14573, B4DK69, H3BUD0, Q5F2F8, Q9BV40, Q8TC12, Q16678, P30837, A6NGV6, O43768, Q15907, A0A169TED2, Q6WKZ4, P17516, C8C069, B0AZR9, O60218, J3QRU4, B4DKB2, A0A1B0GTB0, B4DMF5, P05141, P05543, P22466, A8K787,…	0.224359	0.532944	0.0108696
GO:0051235	maintenance of location	P	1	93	17	6210	0.0588235	0.0149758	over	G3V1D1	Q59GI3, P19174, Q49AE1, Q5SWX3, G3V1D1, A8KA62, P16615, B4DDT3, Q5STV6, B2R983, Q8WTS1, P61981, H9KV50, H3BT57, A0A1B0GUC3, D6R938, Q9Y4G6, Q14571, H7C2Z6, P22694, E9PB90, P27348, B2RDW0, Q14573, Q04917, Q12797, B3KT70, B7ZLE0, Q12955, B3KW93, A0A140T8Z0, F6KPG5, B4DG62, P11021, A0A0U1RRH1, P42858, H3BPW1, A5YM53, P41208, B4E2J2, Q9BXH1, P01024, P21333, A0A087X1T2, Q8NEW0, O75369, E9PK00, Q9Y6M5,…	0.226515	0.536328	0.0107527
GO:0016757	transferase activity, transferring glycosyl groups	F	1	94	17	6210	0.0588235	0.0151369	over	Q4G148	Q59GM9, Q05BM8, O43598, Q7Z7M9, B4DEN5, B3KP69, Q9H488, A0A024R3J7, Q499Z2, Q9NS00, H7C4I6, Q9NYU1, O60568, Q9NYU2, A0A0C4DGS1, O60762, A0A0M4G3H8, Q8NBJ5, B2R8W4, Q9Y2C3, S4R350, Q9H1B5, Q58A70, O15294, P04843, F5H225, Q16831, Q8NAT1, B0FY46, Q6NUL1, H0YKI1, B7Z5L6, Q8TCJ2, P11216, P19224, Q7Z2W4, B7Z5C5, D3DQI7, B4DUF1, H0Y9B6, Q86SF2, Q8NBI6, Q9HC03, A0A087WUD3, Q6XQN6, P07686, Q6UW63, B2R758,…	0.228664	0.537947	0.0106383
GO:0090068	positive regulation of cell cycle process	P	1	94	17	6210	0.0588235	0.0151369	over	Q5JSB5	B2RE34, O43159, F6R503, Q5JSB5, P14635, J3QLB5, O43715, A5YKK6, Q96L51, A8K2I7, B4DIZ6, K7ELY9, A0A0A0MSQ3, Q5JR08, Q9Y6G9, O60885, J3KPX7, Q9UH60, F8VYH9, B4DS09, H0YM23, B3KTJ9, Q53S54, A8K097, Q9H4H8, Q5QPD4, Q9BQG0, P61586, H0Y9C1, E9PKG1, Q9C0C2, H0Y5N4, A0A0S2Z3I0, P06748, B3KM57, D3DR32, Q16513, A5PLK7, Q15907, B7Z6J7, Q8IY18, B7Z5H7, H7BYN4, Q9H9A5, Q8IUI8, A0A0D9SFB3, Q9UKZ1, Q07812, P12…	0.228664	0.537947	0.0106383
GO:0008202	steroid metabolic process	P	1	95	17	6210	0.0588235	0.0152979	over	Q16678	Q8IZ83, A0A024R3R5, Q15738, H0YKF9, A0A1B0GW73, Q9BTZ2, Q9NRW5, P53602, A8KA68, Q2VF42, A8KA27, C9J8Q5, B4DHX0, P05091, P61981, H0YFI1, P08842, A0A0B5EEB2, Q04917, P48449, B4DK69, P30038, H3BUD0, A8K237, Q16678, P30837, B2RB23, A8K0D2, Q02252, B4DE67, P17516, C8C069, P37268, P14324, P54868, A0A024R1M8, O60218, B4DVP5, H0YEN6, B3KRC6, P55084, A0A024R4X0, Q13131, B7Z4S8, H0YHN9, P37059, E5RHW4, Q53…	0.230808	0.539533	0.0105263
GO:0009266	response to temperature stimulus	P	1	95	17	6210	0.0588235	0.0152979	over	B4DUP5	Q9UL15, H0YDD9, P54652, P07900, P0DMV9, B2RA34, B4DZG6, O75340, P35658, Q53FD7, P42345, B2R7U4, O60884, D6R938, B3KTJ9, Q9BW27, Q96HE7, Q15185, P0DJD0, P49137, B2R7I1, P25685, B3KM81, Q8WUM0, Q14011, Q96HA1, C9J185, P31689, P49770, H0YME5, B3KTT0, Q9H078, B2R7E8, P37198, P11142, P11021, B3KSM6, Q49A72, B2R6X5, P12270, Q9UI10, E9PJB2, P49841, B7Z4V2, Q96EB6, P27694, Q96B36, Q09472, B5MC59, B4DHN0,…	0.230808	0.539533	0.0105263
GO:0044249	cellular biosynthetic process	P	8	2226	17	6210	0.470588	0.358454	over	K7ER90, B4DXI2, B4DUP5, A0A1B0GVI7, Q16678, Q5JSB5, Q96AE4, Q4G148	Q0VGA5, O75947, B2RAH5, B2RAH2, Q68E09, E7EVH9, B2R983, H3BT57, Q68E01, B4DEA3, Q8N3U4, A8K2R3, B4DMQ7, Q92974, B2R506, A0A024R669, D6RBL4, Q9H4L7, O14561, H0Y6H0, B4DVD6, C8C069, P54868, Q8NDV7, P0CJ79, B3KY11, B2RAI2, P19623, Q96EB1, P62487, B2R8X4, A8K6Y1, Q9Y285, A0A0A8K8C0, O15405, Q96EB6, Q6NUM7, B4DMT5, P27694, Q86SY9, Q9UKV8, B4DMT1, A0A024R5X6, A0A087WZT0, Q5T6Z8, Q6MZZ4, Q9Y295, Q8N442,…	0.234953	0.546039	0.00359389
GO:0050877	neurological system process	P	1	97	17	6210	0.0588235	0.01562	over	Q16678	Q96L92, O95834, Q49AE1, Q9UBB5, A0A0A0MTB8, Q9H0U3, P43034, Q92696, Q96DA6, Q14573, O75828, Q9HC10, Q5F2F8, A0A087WU84, Q59EH0, Q59FR5, A0A140T8Z0, B0AZR9, B4DRL9, B1APR7, Q02846, P42858, B2R7N6, E9PDF6, H6WA46, Q9UKN7, H0Y465, P51884, P35237, P04181, Q4KMQ1, P22676, P00441, Q8NGA1, O75911, O95983, Q8IZV5, O43306, Q7L576, Q08257, O75083, B3KXQ3, F8WEW9, F5CTF4, A0A0U1RRJ0, Q8WUJ3, A0A024RBC7, M0Q…	0.235079	0.546039	0.0103093
GO:0009101	glycoprotein biosynthetic process	P	1	98	17	6210	0.0588235	0.015781	over	Q4G148	Q7Z7M9, P18085, B3KP69, O95394, A0A024R3J7, Q86TM6, Q9NS00, E7EW15, Q9NYU1, Q9NYU2, Q9H0U3, Q9Y6X1, Q9BZQ6, P07996, P49257, Q8TCJ2, Q9UKM7, B3KSN1, Q9H3R2, Q9HC07, Q9HC03, B2R758, Q96EB6, Q15397, C9J1Z8, D6RF69, B2R6D4, A0A0A0MTD6, Q5T6Z8, B3KNL8, A0A024R6B4, A0A0S2A5C8, P61204, B7Z5U1, G3V150, B4DL06, P09874, Q9BT22, Q8IZ52, Q4G148, B3KQT5, F8VUJ3, B4DLB8, Q9H4A6, A5YRV2, G3V167, Q96JB2, B2R8J0,…	0.237207	0.549242	0.0102041
GO:0006820	anion transport	P	1	100	17	6210	0.0588235	0.0161031	over	Q9BYH2	A0A1B0GW76, H0YDD9, P28288, Q8NCD8, Q49AE1, A0A0A0MTB0, A0A0K2BMD8, P50416, Q01650, P53007, P07996, Q9Y277, Q9NRX5, D6RIZ4, F6KPG5, A0A1B0GTB8, A8K6H9, J3QRU4, B2R7N6, Q13136, B3KVU0, M0R106, O43772, A0A0S2Z3V0, B2R921, B2R7W7, B4DY23, B4E106, E9PMI6, Q5R3B4, B4DHI5, Q5Y190, Q9UHQ9, Q9Y6R1, Q537H9, B1AH87, U3PXP0, O00299, A0A088AWL3, F5CTF4, B4DFF2, O14975, O15427, B0QYW5, B2RE34, Q14802, Q9C0H2,…	0.241444	0.553465	0.01
GO:0019222	regulation of metabolic process	P	8	2241	17	6210	0.470588	0.36087	over	B4DXI2, K7ER90, A0A1B0GVI7, B4DUP5, Q16678, Q5JSB5, Q96AE4, G3V1D1	E9PJ81, A8K2Q6, B2RAH5, B2RAH2, Q68E09, Q9BYG3, F5GZI3, H3BT57, Q92973, B4DEA3, Q8N3U4, A8K2R3, Q92974, E7EMW7, A8K330, B2R506, B4DII5, Q9BQ69, A0A024R669, Q9H4L4, A0A024R5U7, D6RBL4, Q9H4L7, Q9UKU7, Q12834, H0Y6H0, S4R3H4, E9PIX7, C8C069, F8WB76, Q8NDV7, B3KY11, P0CJ79, B2RAI2, P16104, Q96EB1, P62487, B2R8X4, Q99598, P42858, Q8WXA9, Q9H0C8, A8K6Y1, A0A0A8K8C0, O15405, A8K321, Q96EB6, P10809, B4D…	0.241577	0.553465	0.00356983
GO:0046983	protein dimerization activity	F	2	345	17	6210	0.117647	0.0555556	over	A0A1B0GVI7, Q05BX6	B8ZZL5, C9JBI3, B2ZGL7, H0YDD9, F2Z2V0, P06899, M0R205, Q53SF4, O00268, B2R7D7, B4DIZ6, B2R7U4, H3BV98, H3BT57, E7EVY0, B3KRB7, E9PNQ9, B4DMQ7, Q9HAV7, B2R506, P27487, C9J185, Q9HB71, D3DXC9, P62805, K7EKE8, F8VSL3, O00154, B7Z4N7, C8C069, P19623, P51116, A0A024R0K5, Q9Y2H2, P16104, Q9UBT2, E9PQX9, B2R8X4, B4E2J2, Q15554, O15405, Q05BX6, B4DV31, Q8N335, O15525, Q9H2G2, B2R5B6, Q13257, A0A024R5X6,…	0.243059	0.553465	0.0057971
GO:0006066	alcohol metabolic process	P	1	101	17	6210	0.0588235	0.0162641	over	Q16678	C9J173, A0A024R3R5, P19174, A0A1B0GW73, Q9NRW5, A8KA68, Q00796, A4UCT0, B4DHX0, P36871, D3DVH3, E9PB90, B2RDW0, P48449, B4DK69, B3KT70, Q8TC12, B4DDQ8, A8K0D2, P37268, P14324, B4DG62, O60218, H0YEN6, B3KRC6, H6WA46, J3QQN7, P51648, C9JZB0, A0A0S2Z3V0, E7ESY0, A0A0G2JNZ5, B2R761, A0A0A0MSS8, B7Z301, P00441, O75911, P53396, O95989, A0A0S2Z4Q3, P10109, Q8IZV5, O75477, B4DE48, Q2Q9H2, C9IZF6, P15121,…	0.243555	0.553465	0.00990099
GO:0002694	regulation of leukocyte activation	P	1	101	17	6210	0.0588235	0.0162641	over	A0A1B0GVI7	B4DLX6, H3BLV0, P15529, P12931, Q53RD8, Q05209, P42345, P04083, P27986, P07996, Q14451, P27487, Q16512, K7EKE8, Q53TG4, N1NSB5, P10644, E7ES08, A0A0S2Z3Y4, A8K3B6, J3QRU4, A0A090MEX8, P14174, P09382, O43290, H3BPW1, P10809, O95219, Q15836, Q12846, Q06124, Q03135, Q3KRG8, P51809, A2RQD7, Q9Y2A7, K7ES89, B4DTQ6, B3KR50, Q13546, B4DPS0, P10747, S6FRS6, K7EPR5, Q13153, A0A024QZC2, Q9BQD2, A8K885, Q86…	0.243555	0.553465	0.00990099
GO:0045930	negative regulation of mitotic cell cycle	P	1	101	17	6210	0.0588235	0.0162641	over	Q5JSB5	I3L4A2, O43670, Q6P1J9, Q5JSB5, A0A024RAV5, Q96K76, O43715, A5YKK6, Q8TCS8, O60566, Q9Y6G9, H3BT57, Q9UH60, Q68E01, Q9C0C2, P01111, A0A0S2Z3I0, P33981, Q7Z5X8, B7Z6J7, B2R7E8, A4LAA3, Q8TAE8, A0A0C4DFT3, P12270, Q05D30, Q09472, Q13257, H6WA46, A0A024RB10, Q59F45, K7EIU4, A0A0S2Z470, Q9P119, A0A0G2JNZ2, Q92796, B7Z9U0, Q16254, F5H2U8, Q96NB3, Q86XZ2, P31947, A0A024R6Q8, B3KP18, P51532, P12004, P42…	0.243555	0.553465	0.00990099
GO:0007050	cell cycle arrest	P	1	102	17	6210	0.0588235	0.0164251	over	Q5JSB5	P36507, O43159, F8VYY9, Q5JSB5, A0A024RAV5, O43715, A5YKK6, Q8TCS8, A0A0A0MSQ3, B4DDX2, P42345, H3BT57, F8VYH9, Q9UH60, H0YFI1, Q53S54, B7Z6Y2, Q9BQG0, Q9BSK2, Q9C0C2, B5BUD5, P07996, P01111, A8K710, A0A0S2Z3I0, X5D7Q2, B7Z6J7, J3QS66, Q8TAE8, P14174, Q5JSL0, A8K6Y1, Q2MJK0, Q13131, Q9Y2Q5, Q09472, B3KN49, Q59F45, H6TXS1, A2RQD7, Q9P119, Q00535, Q00534, B7Z9U0, Q16254, Q5T2B5, F5H2U8, Q86XZ2, P31…	0.24566	0.556526	0.00980392
GO:0045893	positive regulation of transcription, DNA-templated	P	2	349	17	6210	0.117647	0.0561997	over	A0A1B0GVI7, Q5JSB5	P36507, Q5T911, P18085, P67809, Q5JSB5, B5BTZ6, Q53SF4, B2RAH5, B3KR25, Q53RD8, O00268, P13984, O00148, B2RAH2, I3L412, Q8WWQ0, E5KSX8, E7ETD6, H0YN81, A8K2R3, B3KRB7, H7C212, D6RHI7, B4DUQ1, Q13363, O94906, B2R506, Q92974, C9J185, A0A024R669, Q15545, Q9H4L7, B2RMQ4, Q53TG4, Q5VTR2, C8C069, E9PGT3, E7ES08, B2R8X4, Q92841, Q2VIN3, O15405, Q96EB6, Q9ULX6, Q6LCB0, P22466, Q6N069, C9J1Z8, A8K103, Q9U…	0.247196	0.556571	0.00573066
GO:1903508	positive regulation of nucleic acid-templated transcription	P	2	349	17	6210	0.117647	0.0561997	over	A0A1B0GVI7, Q5JSB5	P36507, Q5T911, P18085, P67809, Q5JSB5, B5BTZ6, Q53SF4, B2RAH5, B3KR25, O00268, Q53RD8, P13984, O00148, B2RAH2, I3L412, Q8WWQ0, E5KSX8, E7ETD6, H7C212, H0YN81, A8K2R3, B3KRB7, D6RHI7, B4DUQ1, Q13363, O94906, B2R506, Q92974, C9J185, A0A024R669, Q9H4L7, Q15545, B2RMQ4, Q5VTR2, Q53TG4, C8C069, E9PGT3, E7ES08, B2R8X4, Q92841, Q2VIN3, O15405, Q96EB6, Q9ULX6, Q6N069, Q6LCB0, P22466, C9J1Z8, A8K103, Q9U…	0.247196	0.556571	0.00573066
GO:0000082	G1/S transition of mitotic cell cycle	P	1	106	17	6210	0.0588235	0.0170692	over	Q5JSB5	Q7LG56, Q6P1J9, Q5JSB5, P33992, Q53SF4, O43715, A5YKK6, Q9UH60, F8VYH9, Q53S54, Q0IJ49, Q9C0C2, D6RHI7, O75419, P78536, A0A0S2Z3I0, Q7Z5X8, Q4ZG57, B7Z6J7, B2R7E8, B7Z5H7, Q14181, F5H1D6, E5RFJ8, P00374, Q2MJK0, Q09472, P27694, Q86SY9, H6WA46, K7EIU4, H0Y589, Q00534, A8K9A5, R4GND1, B7Z9U0, Q16254, Q5T2B5, Q86XZ2, P31947, B4DPS0, Q86Y37, A0A024R6Q8, P51532, A0A0C4DGX4, P12004, P18754, P42677, A5Y…	0.254025	0.568458	0.00943396
GO:0060589	nucleoside-triphosphatase regulator activity	F	1	106	17	6210	0.0588235	0.0170692	over	Q05BX6	O95433, Q9BST9, I3L412, Q59E87, P46940, A0A0D9SF70, A9UK01, P25685, A1A4S6, Q9HAV7, X5D7Q2, B4E0W3, Q9UII2, Q59EH0, Q5T123, Q3SY98, B4DRL9, Q8NFQ8, A0A096LP07, A0A0C4DGN6, Q05BX6, P50395, A8K103, F8W9Y7, Q9NRY4, H0Y465, B4DLZ1, A2RQD7, E7ESY0, P11274, Q8IXB1, A0A0A0MSK5, Q15042, B4DIC3, A0A0A0MSK6, B3KWF6, O43665, P07737, E5RHT6, B3KM36, F8W8N5, Q07960, Q4KMP7, B7Z2X0, P31150, F2Z357, P43487, Q15…	0.254025	0.568458	0.00943396
GO:0009100	glycoprotein metabolic process	P	1	108	17	6210	0.0588235	0.0173913	over	Q4G148	Q7Z7M9, P18085, B3KP69, O95394, A0A024R3J7, Q86TM6, Q9NS00, E7EW15, Q9NYU1, Q9NYU2, Q9H0U4, Q9H0U3, Q9Y6X1, Q9BZQ6, P07996, P49257, Q9BS26, Q8TCJ2, Q9UKM7, B3KSN1, Q9H3R2, Q9HC07, Q9HC03, B2R758, Q96EB6, Q15397, C9J1Z8, D6RF69, B2R6D4, A0A0A0MTD6, Q5T6Z8, B3KNL8, A0A024R6B4, A0A0S2A5C8, P61204, B7Z5U1, G3V150, B4DL06, P09874, Q9BT22, B3KM35, Q8IZ52, Q4G148, B3KQT5, F8VUJ3, B4DLB8, Q9H4A6, A5YRV2,…	0.258175	0.574243	0.00925926
GO:0044843	cell cycle G1/S phase transition	P	1	108	17	6210	0.0588235	0.0173913	over	Q5JSB5	Q7LG56, Q6P1J9, Q5JSB5, P33992, Q53SF4, O43715, A5YKK6, Q9UH60, F8VYH9, Q53S54, Q0IJ49, Q9C0C2, D6RHI7, O75419, P78536, A0A0S2Z3I0, Q7Z5X8, Q4ZG57, B7Z6J7, B2R7E8, B7Z5H7, Q14181, F5H1D6, E5RFJ8, Q2MJK0, P00374, Q09472, P27694, Q86SY9, H6WA46, K7EIU4, H0Y589, Q00534, A8K9A5, R4GND1, B7Z9U0, Q16254, Q5T2B5, Q86XZ2, P31947, B4DPS0, Q86Y37, A0A024R6Q8, P51532, A0A0C4DGX4, P12004, P18754, P42677, A5Y…	0.258175	0.574243	0.00925926
GO:1902680	positive regulation of RNA biosynthetic process	P	2	365	17	6210	0.117647	0.0587762	over	A0A1B0GVI7, Q5JSB5	P36507, Q5T911, P18085, P67809, Q5JSB5, B5BTZ6, Q53SF4, B2RAH5, B3KR25, O00268, Q53RD8, P13984, O00148, B2RAH2, I3L412, Q8WWQ0, E5KSX8, E7ETD6, H7C212, H0YN81, A8K2R3, B3KRB7, D6RHI7, B4DUQ1, Q13363, O94906, B2R506, Q92974, C9J185, A0A024R669, Q9H4L7, Q15545, B2RMQ4, Q5VTR2, Q53TG4, C8C069, E9PGT3, E7ES08, P62487, B2R8X4, Q92841, Q2VIN3, O15405, Q96EB6, Q9ULX6, Q6N069, Q6LCB0, P22466, C9J1Z8, A8K…	0.263792	0.579222	0.00547945
GO:0006875	cellular metal ion homeostasis	P	1	111	17	6210	0.0588235	0.0178744	over	G3V1D1	Q8TD43, H3BLV0, P18085, P19174, B7Z4M5, Q49AE1, Q5SWX3, G3V1D1, P16615, A8KA62, Q59G44, Q8NE86, B2RAH2, B2R7U4, A0A0S2Z5C8, B2R983, D6R938, Q14571, H7C2Z6, P22694, B2RDW0, Q14573, Q12797, B7ZLE0, Q12955, A0A140T8Z0, H0Y953, E7ES08, A0A0S2Z3Y4, P42858, A0A0U1RRH1, B3KRK7, Q9HC07, Q9NWR8, P30519, H3BPW1, B4E2J2, C9JAX1, P02795, C9J1Z8, P04732, B2RB38, Q8NEW0, P53384, O95292, Q8IYU8, Q03135, P13693,…	0.264359	0.579222	0.00900901
GO:0005769	early endosome	C	1	111	17	6210	0.0588235	0.0178744	over	Q05BX6	P36507, Q96L92, P57729, Q5VYK3, E9PM62, Q59GU6, P61020, P04083, Q9UK41, Q96QK1, Q14694, H7C331, B2R5I8, Q9UNK0, Q53H75, Q9Y2H2, A0A090MEX8, X6RFL8, Q8N4V1, O15400, Q05BX6, P10809, E9PDF6, H0YLF3, X2KXS7, O95219, Q9UN37, Q03135, B3KR49, A9QQ22, A8KAQ3, A7E2Y5, Q9H267, A0A0S2Z3V0, A8K4G7, O60784, Q9UJU1, B2RAK1, F8VVT7, B5MC02, A0A1B0GTU3, A8K8N5, B4DE48, O75197, F6KRM6, A8YQF4, P35232, Q59EZ3, A0A…	0.264359	0.579222	0.00900901
GO:0003713	transcription coactivator activity	F	1	111	17	6210	0.0588235	0.0178744	over	Q5JSB5	Q86TU7, P78545, Q5JSB5, P12814, B3KR25, O00268, H3BT57, P17275, B4DYQ3, Q9ULW3, A8K2R3, O94906, B2R506, H0Y5N4, B4DTY4, Q15545, Q5T6U8, Q16512, A0A169TED2, Q5VTR2, M0R2P1, Q59H57, B3KRT9, A8K0D4, Q5JTV1, Q96T76, K7EIJ0, B2R8X4, Q99991, Q92841, B4DYZ9, B4DPP5, Q12962, Q09472, Q5JQ44, Q00653, Q86UE4, Q9HD15, P17096, Q05D20, B4DL06, E7ESY4, J3KMX2, Q59EJ8, B3KMT5, Q8IX12, O75475, A0A024R6Q8, P51532,…	0.264359	0.579222	0.00900901
GO:0010035	response to inorganic substance	P	1	111	17	6210	0.0588235	0.0178744	over	Q16678	F2Z2V0, P23396, Q49AE1, A0A0K2BMD8, P10599, A0A0C4DFU1, Q6ICS0, Q5JR08, B2R7U4, Q9UH60, D6R938, Q2TAM5, F8VYH9, Q14571, P46940, B2RDW0, Q14573, P07996, B4DK69, Q12797, Q5F2F8, O75131, H0Y953, A4LAA3, P67775, A0A0U1RRH1, C9JAX1, B4E1P2, P02795, Q96EB6, Q8NBY1, H0YLF3, P04732, Q09472, Q8NEW0, A0A024RB10, E9PEQ6, B7Z3I9, A0A087WUQ6, B3KNL8, A2RQD7, Q00535, Q7Z333, A0A0A0MSS8, P00441, A8MW49, Q8N959,…	0.264359	0.579222	0.00900901
GO:0050865	regulation of cell activation	P	1	112	17	6210	0.0588235	0.0180354	over	A0A1B0GVI7	B4DLX6, H3BLV0, P15529, P12931, Q53RD8, Q05209, P42345, P04083, P27986, P07996, Q14451, P27487, Q16512, Q16513, K7EKE8, A0A169TED2, Q53TG4, N1NSB5, P10644, E9PGT3, E7ES08, A0A0S2Z3Y4, A8K3B6, J3QRU4, A0A090MEX8, P14174, P09382, O43290, H3BPW1, P10809, O95219, Q15836, Q12846, Q06124, Q03135, A0A0S2Z3V0, Q3KRG8, P51809, A2RQD7, Q9Y2A7, K7ES89, B4DTQ6, B3KR50, Q13546, B4DPS0, P10747, P51812, S6FRS6,…	0.266409	0.581977	0.00892857
GO:0042127	regulation of cell proliferation	P	2	369	17	6210	0.117647	0.0594203	over	A0A1B0GVI7, G3V1D1	Q9H7S9, P36507, Q8TD43, B3KS40, H3BLV0, O14672, B5BTZ6, Q53SF4, F2Z2E2, B4DIZ6, Q8WWQ0, B2R7U4, Q5JR08, H3BT57, F8VYH9, Q9HBH1, Q53S54, I3L3P7, Q9BSK2, Q6PIA0, H3BN98, H7C212, B3KM81, P07996, Q13363, Q92974, B4DL02, P27487, B7ZKK7, A0A0D9SG71, Q16512, P46781, A0A169TED2, Q53TG4, C8C069, E9PGT3, Q9ULG6, E7ES08, P16104, A8K3B6, B2R8X4, P14174, C9JAX1, P67936, Q96EB6, Q2MJK0, Q29RF7, B2R5B6, Q9UKV8,…	0.26795	0.582975	0.00542005
GO:0098798	mitochondrial protein complex	C	1	113	17	6210	0.0588235	0.0181965	over	Q9UDW1	B4DJ38, O75947, Q6LCA9, O75306, K9J7I2, Q9BST9, Q9UEH5, O96008, O43678, Q8NE86, B4DEZ3, Q9UDW1, P46940, O95168, R4GN43, A0A0A6YYL4, P48047, P28331, Q9UII2, Q9UI09, B9A067, Q9BRQ6, A0A097PY54, O14561, Q3SY98, O95167, B4E2B5, O75380, A0A096LP07, P11182, Q9NWR8, E9PN17, Q9BTT5, F1B5L2, B4DL14, J3KRJ3, Q96DP0, O75489, B4DN54, P12236, Q8IYU8, O95298, P25705, P18859, P31040, P56385, Q5XKP0, P56381, P40…	0.268454	0.582975	0.00884956
GO:0072655	establishment of protein localization to mitochondrion	P	1	114	17	6210	0.0588235	0.0183575	over	Q5JSB5	H0YNH5, P07900, B3KS40, Q5JSB5, O96008, A0A024R2H7, A0A0A0MQU3, B4DEZ3, Q96HI4, P63167, A0A075B784, E9PB90, Q15785, P27348, A8K330, Q04917, B5BU25, Q5F2F8, B3KT70, Q01081, A0A0A6YYL4, Q9UII2, O96019, A0A024R9U8, B4DG62, A0A140TA28, F8WCQ4, B3KSM6, Q9Y3B1, P46779, J3KRJ3, B4DN54, P12236, A6NLD2, P63104, P62258, Q9UHQ9, B4DDK7, Q9UBE0, P31946, B1AH87, H0YMG8, P31947, P34931, B7Z6H4, P34932, B3KNN8,…	0.270494	0.583871	0.00877193
GO:0030139	endocytic vesicle	C	1	115	17	6210	0.0588235	0.0185185	over	Q05BX6	C9JJQ5, B4DPP0, P07900, P57729, Q5VYK3, F5H157, A0A087WY71, A0A0K2BMD8, E9PM62, Q6ICS0, P61020, I3L412, Q9H0U4, D6R938, P61026, P59190, B2R7M1, P27487, B2R5I8, P12429, N1NSB5, Q9Y4L1, Q9Y2H2, A0A090MEX8, X6RFL8, A5YM53, O15400, Q05BX6, H0YLF3, A8K103, H0UID5, Q12965, X2KXS7, Q03135, Q9BR76, A0A0S2Z3V0, P51809, P27449, P61966, U3PXP0, Q53G71, Q6LEU0, Q53ET5, B4E2D6, F6KRM6, Q9NX57, A8YQF4, Q5KU26,…	0.272528	0.583871	0.00869565
GO:0009058	biosynthetic process	P	8	2310	17	6210	0.470588	0.371981	over	B4DXI2, K7ER90, A0A1B0GVI7, B4DUP5, Q16678, Q5JSB5, Q96AE4, Q4G148	Q0VGA5, O75947, B2RAH5, B2RAH2, Q68E09, E7EVH9, B2R983, H3BT57, Q68E01, B4DEA3, Q8N3U4, A8K2R3, B4DMQ7, Q92974, B2R506, A0A024R669, D6RBL4, Q9H4L7, Q6IB91, O14561, H0Y6H0, B4DVD6, C8C069, P54868, Q8NDV7, P0CJ79, B3KY11, B2RAI2, P19623, Q96IJ6, Q96EB1, P62487, B2R8X4, A8K6Y1, Q9Y285, A0A0A8K8C0, O15405, Q96EB6, Q6NUM7, B4DMT5, P27694, Q86SY9, Q9UKV8, B4DMT1, A0A024R5X6, A0A087WZT0, Q5T6Z8, Q6MZZ4,…	0.273125	0.583871	0.0034632
GO:0045333	cellular respiration	P	1	116	17	6210	0.0588235	0.0186795	over	Q9UDW1	O75306, P08559, Q7KZN9, K9J7I2, B4DFL1, Q9UEH5, O43678, O43837, B4DEZ3, Q9UDW1, Q8N183, P13073, O14949, P22695, E7EVY0, P20674, O95168, R4GN43, H0UIA1, P28331, Q6IB91, Q9UI09, O14561, P11177, C9JFR7, O95167, Q96HY7, P38117, O75380, P47985, F8W031, A8K168, B4DRV2, Q9BTT5, F1B5L2, Q96DP0, A8K4W7, A0A059QFD5, O75489, Q9H7Q4, B4DJV2, O95298, Q96I99, Q59F44, P31040, P23368, Q13423, P36957, P53396, A0A…	0.274557	0.583871	0.00862069
GO:0072331	signal transduction by p53 class mediator	P	1	116	17	6210	0.0588235	0.0186795	over	Q5JSB5	O43159, F8VYY9, Q5JSB5, O00268, O43715, A5YKK6, Q9HAF1, A0A024RCR6, K7EN45, Q9UH60, B4DKE6, Q9BQG0, Q9ULW0, A8K2R3, B5BUD2, Q9C0C2, Q14694, A0A1B0GU48, A0A0S2Z3I0, P49773, B2RCM6, B3KUR4, B7Z6J7, P35249, B2R7E8, A0A024R307, P14174, E9PL57, B3KNC3, Q08945, J3QR41, Q99638, Q96EB6, Q13131, A8K3S0, Q12962, Q09472, P27694, Q59FM7, Q13535, B3KN49, Q00535, B3KUJ5, B7Z9U0, Q16254, Q59EJ8, O95983, Q8N959,…	0.274557	0.583871	0.00862069
GO:1901615	organic hydroxy compound metabolic process	P	1	116	17	6210	0.0588235	0.0186795	over	Q16678	C9J173, A0A024R3R5, P19174, A0A1B0GW73, Q9NRW5, A8KA68, Q00796, B4DHX0, A4UCT0, P36871, D3DVH3, E9PB90, B2RDW0, P48449, B4DK69, B3KT70, Q8TC12, B4DDQ8, A8K0D2, C8C069, P37268, P14324, B4DG62, O60218, H0YEN6, B3KRC6, B7Z4S8, H6WA46, J3QQN7, P51648, C9JZB0, A0A0S2Z3V0, E7ESY0, A0A0G2JNZ5, B2R761, A0A0A0MSS8, B7Z301, P00441, O75911, P53396, O95989, P22570, A0A0S2Z4Q3, P10109, Q8IZV5, O75477, B4DE48,…	0.274557	0.583871	0.00862069
GO:0000075	cell cycle checkpoint	P	1	116	17	6210	0.0588235	0.0186795	over	Q5JSB5	I3L4A2, O43670, Q5JSB5, O75663, A0A024RAV5, C9J8E1, O43715, A5YKK6, O00148, O60566, Q9Y6G9, M0QXG9, Q9UH60, Q68E01, P49137, Q9C0C2, P01111, A8K710, O75419, A0A0S2Z3I0, Q13769, P33981, Q7Z5X8, Q8NG31, B7Z6J7, B2R7E8, P16104, A0A024R307, P12270, A0PJ48, Q9NVH2, J3QR41, Q99638, Q05D30, Q09472, Q13257, A0A024R4V8, Q13535, A0A024RB10, H6TXS1, A0A0S2Z470, Q9P119, B7Z9U0, Q16254, Q9UMS4, F5H2U8, Q8N959,…	0.274557	0.583871	0.00862069
GO:0045934	negative regulation of nucleobase-containing compound metabolic process	P	2	376	17	6210	0.117647	0.0605475	over	B4DXI2, A0A1B0GVI7	Q9H7S9, Q96LA8, G5E9G6, Q8N108, B5BTZ6, Q53SF4, Q9UBB5, Q53RD8, A5YKK6, H3BT57, E7ETD6, O00273, Q8N3U4, A8K2R3, P27348, B3KM81, E7EMW7, Q13242, Q13363, P38919, Q15545, P62805, H0YLC5, Q5VTR2, Q3SY98, Q53TG4, S4R3H4, C8C069, B3KRT9, E7ES08, B2RAI2, E9PQX9, O75381, A0A0C4DFT3, H0UI99, Q6NX55, A8K6Y1, B4DYZ9, Q15554, C9J7T7, J3QR41, Q96EB6, Q2MJK0, Q29RF7, Q96IZ0, Q8IWY9, Q59FM7, Q9NYF8, B4DLR3, Q9N…	0.275231	0.583871	0.00531915
GO:0004842	ubiquitin-protein transferase activity	F	1	117	17	6210	0.0588235	0.0188406	over	Q53EY9	Q9ULV8, G5E9G6, O95714, Q15819, Q86TM6, A0A0A0MQU3, Q9BRZ2, O95155, E5RI62, A0A0A0MSQ3, Q9C0C9, B4DIZ2, Q96T88, B4DVK6, P62877, Q53S54, H0YKB8, Q6PIA0, E7EMW7, Q7Z7E8, Q15386, E5RJR5, A0A0D9SG71, Q8NEX1, Q13404, H0YIE9, A0A096LNV3, Q5VTR2, B4DG67, A0A024R9U8, B2R9R2, A0A0A6YYC7, B4DYZ9, Q9NPD8, Q9UKV5, B4E215, H3BPC4, B3KN47, Q9P0P0, H6TXS1, A0A0B4J206, Q9NX47, Q9NR09, G3XAG7, R4GND1, Q8TDB6, Q9U…	0.276581	0.584263	0.00854701
GO:0010821	regulation of mitochondrion organization	P	1	118	17	6210	0.0588235	0.0190016	over	Q5JSB5	H0YNH5, B3KS40, Q5JSB5, A0A0A0MQU3, B7Z6I3, O43715, K7ELY9, Q96HI4, P63167, A0A075B784, P27348, Q04917, A8K330, B5BU25, Q5F2F8, Q2QL34, Q01081, Q9UII2, O96019, B2RB23, H0Y953, A0A024R9U8, A0A140TA28, F8WCQ4, B3KSM6, Q9Y3B1, B3KRK7, C9JAX1, P46779, E9PEQ6, P12236, A0A087WUQ6, Q9NX47, B4DQK1, Q9Y2R0, P63104, P62258, B4DS67, Q9UHQ9, B7Z314, B4DDK7, Q9UBE0, P31946, P31947, H0YMG8, H3BTL1, P34931, B7Z…	0.278599	0.584263	0.00847458
GO:0070585	protein localization to mitochondrion	P	1	118	17	6210	0.0588235	0.0190016	over	Q5JSB5	H0YNH5, P07900, B3KS40, Q5JSB5, O96008, A0A024R2H7, A0A0A0MQU3, B4DEZ3, Q96HI4, F8WF76, P63167, A0A075B784, E9PB90, Q15785, P27348, A8K330, Q04917, B5BU25, P31689, Q5F2F8, B3KT70, Q01081, A0A0A6YYL4, Q9UII2, O96019, A0A024R9U8, B4DG62, A0A140TA28, F8WCQ4, B3KSM6, Q9Y3B1, P46779, J3KRJ3, B4DN54, P12236, A6NLD2, Q9NX47, P63104, P62258, Q9UHQ9, B4DDK7, Q9UBE0, P31946, B1AH87, H0YMG8, P31947, P34931,…	0.278599	0.584263	0.00847458
GO:0046982	protein heterodimerization activity	F	1	118	17	6210	0.0588235	0.0190016	over	A0A1B0GVI7	P06899, E5RGS9, O43399, B4DLX8, H7C2I6, O00268, Q59GU6, A0A0F7L0Q8, H3BT57, Q2TAM5, H7C2Z6, B3KRB7, E9PNQ9, P07237, Q04917, L0R4T3, B2R506, P62805, F8VSL3, K7EKE8, B3KXX5, P19224, C8C069, B3KUR4, A8K0D4, P16104, P51116, Q9UBT2, E9PQX9, Q59GT1, B2R8X4, B3KRK7, Q8N2Z9, O15525, B2R5B6, D3DWY0, A8K984, A0A024R5X6, O75367, B0AZQ4, O95292, Q8IYU8, A8KA83, P11388, B3KNL8, E9PMI6, B4DVU8, P63104, P62258,…	0.278599	0.584263	0.00847458
GO:0055065	metal ion homeostasis	P	1	120	17	6210	0.0588235	0.0193237	over	G3V1D1	Q8TD43, H3BLV0, P19174, P18085, Q49AE1, B7Z4M5, Q5SWX3, G3V1D1, P16615, A8KA62, Q59G44, Q8NE86, B2RAH2, B2R7U4, A0A0S2Z5C8, B2R983, D6R938, Q14571, H7C2Z6, P22694, B2RDW0, Q14573, Q12797, B7ZLE0, Q12955, A0A140T8Z0, H0Y953, E7ES08, A0A0S2Z3Y4, B2R9R2, A0A0U1RRH1, B3KRK7, P42858, Q9HC07, Q9NWR8, P30519, H3BPW1, B4E2J2, C9JAX1, P02795, C9J1Z8, P04732, H0YLF3, B2RB38, A0A024R610, Q8NEW0, P53384, O95…	0.28262	0.59015	0.00833333
GO:0044455	mitochondrial membrane part	C	1	121	17	6210	0.0588235	0.0194847	over	Q9UDW1	B4DJ38, O75947, O75306, Q7KZN9, K9J7I2, Q9BST9, Q9UEH5, O96008, O43678, Q8NE86, B4DEZ3, Q9UDW1, P17152, H3BST5, P22695, P46940, E7EVY0, O95168, R4GN43, A0A0A6YYL4, P28331, P48047, Q9UI09, Q9UII2, B9A067, Q9BRQ6, O14561, A0A097PY54, Q3SY98, O95167, B4E2B5, O75380, A0A096LP07, Q9NWR8, E9PN17, Q9BTT5, F1B5L2, B4DL14, J3KRJ3, L0R5D5, Q96DP0, O75489, B4DN54, P12236, Q8IYU8, O95298, P25705, P18859, P31…	0.284623	0.59015	0.00826446
GO:0045787	positive regulation of cell cycle	P	1	121	17	6210	0.0588235	0.0194847	over	Q5JSB5	O43159, Q5JSB5, J3QLB5, O43715, A5YKK6, B4DIZ6, A8K2I7, K7ELY9, A0A0A0MSQ3, Q5JR08, Q9Y6G9, F8VYH9, Q9UH60, Q53S54, Q9BQG0, I3L3P7, H3BN98, Q9C0C2, H0Y5N4, P78536, A0A0S2Z3I0, Q16513, A0A169TED2, Q9ULG6, B7Z6J7, B7Z5H7, P14174, Q5JSL0, P12270, J3QR41, Q09472, Q9UK58, Q13257, Q9UN37, Q7Z7K6, O75367, H6TXS1, H3BRX7, A8K4G7, Q00534, K7ES89, E5RK09, R4GND1, B7Z9U0, Q16254, H7C0P7, F5H2U8, Q8N959, Q86…	0.284623	0.59015	0.00826446
GO:0016042	lipid catabolic process	P	1	121	17	6210	0.0588235	0.0194847	over	Q16678	Q8N2K0, B2ZGL7, P28288, Q8IZ83, Q9H845, A8MXV4, P19174, A0A1B0GTR1, P50416, Q8IV08, P50897, Q8WTS1, A0A024R8L7, P43034, P43155, P08842, B2R6K1, Q04917, B4DK69, Q9UKU7, Q16512, Q7Z5X8, F8WEV0, O60218, P38117, P30084, B3KPX1, Q68CS2, H0YHN9, J3QQN7, P51648, Q59FU4, A0A0S2Z3V0, Q01469, P09110, A0A0G2JNZ5, B2R761, Q86WA8, P63104, A0A0A0MSS8, P45954, Q92947, O15270, A8MW49, P29762, P40939, P31946, Q5T…	0.284623	0.59015	0.00826446
GO:0046914	transition metal ion binding	F	2	386	17	6210	0.117647	0.0621578	over	Q16678, G3V1D1	A8K566, Q9ULV8, B3KM89, Q8NC42, B2R9Y1, A0A0K2BMD8, Q9BRZ2, E9PI61, O60568, H3BT57, E7ETD6, O00151, Q6NZY4, B4DMQ7, Q9Y3Z3, B4DHG3, Q75MM6, E7EMW7, A0A024R669, Q8NEX1, I3VM54, Q5VTR2, A0A087WXN4, B3KRC6, Q9UKV5, Q53RS5, O95696, O95218, O15541, Q59FM7, Q9P0P0, A0A024RBR1, H6TXS1, A8KA01, B7Z3I9, O95571, B3KVL0, C9JRJ5, B3KVL5, Q99584, H0YJ25, O14686, B4DIK4, B2R769, Q8N567, P26358, Q8TDB6, A6N6J7,…	0.285639	0.590589	0.00518135
GO:0044271	cellular nitrogen compound biosynthetic process	P	6	1658	17	6210	0.352941	0.266989	over	K7ER90, B4DXI2, A0A1B0GVI7, B4DUP5, Q5JSB5, Q96AE4	Q0VGA5, O75947, B2RAH5, B2RAH2, Q68E09, E7EVH9, H3BT57, Q68E01, A8K2R3, Q92974, B2R506, A0A024R669, D6RBL4, Q9H4L7, H0Y6H0, B4DVD6, C8C069, Q8NDV7, P0CJ79, B2RAI2, P19623, Q96EB1, P62487, B2R8X4, A8K6Y1, A0A0A8K8C0, Q9Y285, O15405, Q96EB6, B4DMT5, P27694, Q9UKV8, B4DMT1, A0A024R5X6, A0A087WZT0, Q9Y295, Q6MZZ4, Q8N442, A8K2T5, K7EKI4, P26358, F8WFB0, Q59EJ8, Q9BQ48, C9JCN8, F5H2U8, P26373, Q5BKZ1,…	0.288702	0.595246	0.00361882
GO:0046649	lymphocyte activation	P	1	124	17	6210	0.0588235	0.0199678	over	A0A1B0GVI7	Q96L92, B4DLX6, H3BLV0, P15529, P12931, Q53RD8, Q05209, P42345, P04083, B4DPW9, P27986, Q14451, P27487, Q5F2F8, P78536, Q16512, Q53TG4, N1NSB5, P10644, E7ES08, A0A0S2Z3Y4, A8K3B6, J3QRU4, A0A090MEX8, B3KRK7, P14174, P09382, A0A0C4DGV9, O43290, H3BPW1, P42338, P10809, Q15836, Q06124, Q03135, Q9BR76, Q96HP0, Q3KRG8, P51809, A2RQD7, Q9Y2A7, K7ES89, P05556, B3KR50, Q13546, B4DPS0, P10747, S6FRS6, P17…	0.290599	0.595591	0.00806452
GO:0006351	transcription, DNA-templated	P	4	1004	17	6210	0.235294	0.161675	over	B4DXI2, A0A1B0GVI7, Q5JSB5, Q96AE4	B2RAH5, Q9NQU5, B2RAH2, O00148, Q68E09, E7ETD6, H3BT57, B3KRB0, Q68E01, A8K2R3, B3KRB7, H0YN81, B2R506, Q92974, A0A024R669, Q9H4L7, H0Y6H0, Q5VTR2, B4DVD6, Q05048, C8C069, E9PGT3, F8VZJ2, P0CJ79, B2RAI2, O60216, P62487, Q96EB1, A0A0C4DFT3, B2R8X4, A0A087WXN4, Q2VIN3, Q6NX55, A8K6Y1, A0A0A8K8C0, J3QR41, O15405, Q96EB6, B4E0X8, A8K103, Q9UKV8, B4DMT1, A0A024R5X6, A0A087WZT0, H6TXS1, B3KVL0, B2R6U8,…	0.290715	0.595591	0.00398406
GO:0055114	oxidation-reduction process	P	2	392	17	6210	0.117647	0.063124	over	Q9UDW1, Q16678	Q59GM9, A0A024R3R5, Q9H845, A8MXV4, Q9UEH5, B2R9Y1, A0A0C4DFU1, O60568, B2R7U4, P13073, O00391, B3KXN9, A8K2R3, B4DMQ7, B4DHG3, Q53T76, Q9UKU7, R4GN43, Q6IB91, P28331, A0A024R301, Q9UI09, O14561, H0Y6H0, P52209, C9JFR7, P38117, O60218, P30519, F8W031, B3KRC6, Q53RS5, Q8N335, P50395, A8K4W7, Q9BRX8, Q9H7Q4, J3KNB5, B2R7W0, Q08426, H0YHN9, O95571, P16435, Q6NUM9, B2R7W7, B2R761, Q86WA8, A0A0A0MSS8,…	0.291886	0.595591	0.00510204
GO:0051254	positive regulation of RNA metabolic process	P	2	393	17	6210	0.117647	0.063285	over	A0A1B0GVI7, Q5JSB5	P67809, B2RAH5, O00268, A5YKK6, O00148, B2RAH2, E7ETD6, H0YN81, A8K2R3, B3KRB7, B2R506, Q92974, A0A024R669, Q9H4L7, Q5VTR2, C8C069, E9PGT3, P62487, B2R8X4, Q92841, Q2VIN3, O15405, Q96EB6, Q9ULX6, Q9UK58, A8K103, Q9UKV8, A8MX75, Q9NYF8, A0A024R5X6, H6TXS1, P18615, B4DXI2, H0YJ25, B3KUJ5, Q6MZZ4, O14686, B4DL06, P63104, B2R6U9, B7Z9U0, F8WFB0, Q59EJ8, C9JCN8, F5H2U8, P31946, P19838, A5YRV2, B4DDB5,…	0.292927	0.595591	0.00508906
GO:0051336	regulation of hydrolase activity	P	2	393	17	6210	0.117647	0.063285	over	B4DUP5, B4DWS8	E9PJ81, M0QZS0, B2RAH5, Q5VV41, Q9BYG3, Q68E09, Q5JR08, H0YFI1, P27348, B3KRB7, B3KM81, P07996, B4DL02, Q59EH0, Q5T123, Q5JVZ8, C8C069, E9PGT3, C9JFR7, A0A0C4DFT3, P42858, Q9UI10, Q6NX55, P10809, Q96EB6, A8K103, Q13813, A8KAQ3, O00291, Q9UJU1, P62258, Q8N567, P05556, A8MW49, Q59GN8, P07737, P31947, Q7L576, P18754, A0A024RBQ5, B3KX06, Q96LN2, A0PK02, F2Z357, B4DWA9, Q9H2M9, Q92538, B4DZG7, Q71UM5,…	0.292927	0.595591	0.00508906
GO:1901566	organonitrogen compound biosynthetic process	P	3	695	17	6210	0.176471	0.111916	over	K7ER90, B4DUP5, Q4G148	Q0VGA5, O75947, C9JBI3, Q92615, O75822, B2RBJ8, Q8IXM3, H0YDD8, A5YKK6, O00148, A7BI36, E7EVH9, H3BV98, B2R983, H3BT57, A0A087WXM6, Q9HBH1, P07996, B2RCM2, D6RBL4, P48047, Q9NQ50, Q9NRX2, Q9Y399, O00154, Q8NDV7, E9PGT3, F8VZJ2, P19623, P51116, Q6IA69, P62241, Q9UI10, Q9Y285, C9J7T7, Q6Y1H2, B4DMT5, B4DL14, P25398, Q9UKV8, Q9Y2Y8, B2R7W0, P15104, B7Z3I9, C9JRJ5, P12081, P18859, O60783, P40429, P32…	0.29495	0.598048	0.00431655
GO:0097659	nucleic acid-templated transcription	P	4	1013	17	6210	0.235294	0.163124	over	B4DXI2, A0A1B0GVI7, Q5JSB5, Q96AE4	B2RAH5, Q9NQU5, B2RAH2, O00148, Q68E09, E7ETD6, H3BT57, B3KRB0, Q68E01, A8K2R3, B3KRB7, H0YN81, B2R506, Q92974, A0A024R669, Q9H4L7, H0Y6H0, Q5VTR2, B4DVD6, Q05048, C8C069, E9PGT3, F8VZJ2, P0CJ79, B2RAI2, O60216, P62487, Q96EB1, A0A0C4DFT3, B2R8X4, A0A087WXN4, Q2VIN3, Q6NX55, A8K6Y1, A0A0A8K8C0, J3QR41, O15405, Q96EB6, B4E0X8, A8K103, Q9UKV8, B4DMT1, A0A024R5X6, A0A087WZT0, H6TXS1, B3KVL0, B2R6U8,…	0.296625	0.599786	0.00394867
GO:0010558	negative regulation of macromolecule biosynthetic process	P	2	400	17	6210	0.117647	0.0644122	over	B4DXI2, A0A1B0GVI7	Q9H7S9, Q8N108, Q9UBB5, A5YKK6, H3BV98, H3BT57, E7ETD6, Q8N3U4, A8K2R3, P27348, B3KM81, D6RBL4, Q3SY98, Q8NDV7, C8C069, B2RAI2, P51116, A0A0C4DFT3, H0UI99, Q9UI10, Q6NX55, A8K6Y1, C9J7T7, J3QR41, Q96EB6, Q2MJK0, Q9UKV8, Q9Y2Y8, Q59FM7, Q9NYF8, B4DLR3, Q9NRY4, Q99471, H6TXS1, Q5T5X7, Q5T6Z8, C9JRJ5, B4DXI2, B3KUJ5, P40429, Q9UJU1, A8K2T5, P63104, B4DL06, B7Z9U0, P26358, Q59EJ8, Q9NZI8, F5H2U8, P31…	0.300212	0.605373	0.005
GO:0019787	ubiquitin-like protein transferase activity	F	1	130	17	6210	0.0588235	0.020934	over	Q53EY9	Q9ULV8, G5E9G6, O95714, A0A1B0GTR1, Q15819, Q86TM6, A0A0A0MQU3, Q9BRZ2, E5RI62, O95155, P11441, A0A0A0MSQ3, Q9C0C9, Q96T88, B4DVK6, B4DIZ2, Q53S54, P62877, H0YKB8, P0DJD0, Q6PIA0, Q53SV2, Q7Z7E8, Q15386, F2Z363, E7EMW7, O94874, E5RJR5, A0A0D9SG71, Q8NEX1, Q13404, H0YIE9, A0A096LNV3, Q5VTR2, B4DG67, A0A024R9U8, B2R9R2, A0A0A6YYC7, B4DYZ9, Q9NPD8, Q9UKV5, B4E215, H3BPC4, B3KN47, Q9P0P0, H6TXS1, A0A…	0.302411	0.608135	0.00769231
GO:0006811	ion transport	P	2	403	17	6210	0.117647	0.0648953	over	Q9BYH2, G3V1D1	O75947, H0YDD9, A0A024R798, Q9UEH5, A0A0K2BMD8, B2RAH5, Q8NE86, B2RAH2, B2R983, Q6PJ25, P13073, P27348, P07996, R4GN43, Q12955, Q9Y277, P48047, P28331, Q9UI09, Q9NRX5, D6RIZ4, F8WB76, B3KWN0, J3QRU4, A0A0C4DFT3, P42858, Q8N697, Q8N335, B4DL14, Q13813, Q8NEW0, A0A024R5X6, A8KA01, B7ZKY2, B2R7W7, P18859, P27449, B4DL06, P63104, P62258, B4DHI5, Q9UHQ9, P31946, O15431, A0A0S2Z523, P31947, O00299, B3K…	0.303334	0.608325	0.00496278
GO:0060089	molecular transducer activity	F	1	132	17	6210	0.0588235	0.021256	over	A0A1B0GVI7	Q5T911, G3XAN4, H3BLV0, P15529, Q53SF4, A7BI36, B3KW38, B4DYQ3, Q9BUG9, C9JVH3, Q14571, B2R6S9, B2RDW0, Q14573, P27487, A8K556, P08727, A0A087WU84, K7EKE8, B4E2B8, N1NSB5, B7Z4F4, B4DE20, Q96F46, Q02846, A0A0U1RRH1, A0A024R8K7, B4E2J5, A0A1B0GTB0, A5YM53, Q9UKV5, P22466, B4E336, P08779, A0A024R610, Q08380, Q14108, B3KVU0, A8KAQ3, P31431, O43813, A0A0S2A5C8, Q9NZQ5, Q92796, Q05D20, Q5Y190, P05556,…	0.306306	0.610948	0.00757576
GO:0004872	receptor activity	F	1	132	17	6210	0.0588235	0.021256	over	A0A1B0GVI7	Q5T911, G3XAN4, H3BLV0, P15529, Q53SF4, A7BI36, B3KW38, B4DYQ3, Q9BUG9, C9JVH3, Q14571, B2R6S9, B2RDW0, Q14573, P27487, A8K556, P08727, A0A087WU84, K7EKE8, B4E2B8, N1NSB5, B7Z4F4, B4DE20, Q96F46, Q02846, A0A0U1RRH1, A0A024R8K7, B4E2J5, A0A1B0GTB0, A5YM53, Q9UKV5, P22466, B4E336, P08779, A0A024R610, Q08380, Q14108, B3KVU0, A8KAQ3, P31431, O43813, A0A0S2A5C8, Q9NZQ5, Q92796, Q05D20, Q5Y190, P05556,…	0.306306	0.610948	0.00757576
GO:1901700	response to oxygen-containing compound	P	2	410	17	6210	0.117647	0.0660225	over	A0A1B0GVI7, Q16678	Q9H7S9, H0YDD9, A0A0K2BMD8, A0A0C4DFU1, B2RAH2, Q5JR08, F8VYH9, H0YFI1, B3KRB7, P07996, Q92974, B4DL02, P54868, C9JFR7, E9PGT3, O60218, J3QRU4, P63218, Q9UI10, P67936, Q96EB6, J3KNB5, A0A024RB10, Q12846, Q06124, A8KAQ3, H6TXS1, P16435, B7Z3I9, B3KVL0, B3KUJ5, Q9UJU1, P27449, B1ALI9, B4DL06, A0A0A0MSS8, P26358, Q59EJ8, Q59GN8, A8MW49, C9JCN8, B3KVN0, Q96GD0, Q9BZF1, F5CTF4, P15121, P19838, K7EPR5,…	0.310613	0.617858	0.00487805
GO:0031327	negative regulation of cellular biosynthetic process	P	2	413	17	6210	0.117647	0.0665056	over	B4DXI2, A0A1B0GVI7	Q9H7S9, Q8N108, Q9UBB5, A5YKK6, H3BV98, H3BT57, E7ETD6, Q8N3U4, A8K2R3, P27348, B3KM81, D6RBL4, Q3SY98, C8C069, Q8NDV7, B2RAI2, P51116, A0A0C4DFT3, H0UI99, Q9UI10, Q6NX55, A8K6Y1, C9J7T7, J3QR41, Q96EB6, Q2MJK0, Q9UKV8, Q59FM7, Q9NYF8, Q9Y2Y8, B4DLR3, Q9NRY4, Q99471, H6TXS1, Q5T6Z8, Q5T5X7, C9JRJ5, B4DXI2, B3KUJ5, P40429, Q9UJU1, A8K2T5, P63104, B4DL06, A0A0A0MSS8, P26358, B7Z9U0, Q59EJ8, F5H2U8,…	0.31373	0.621302	0.00484262
GO:0030003	cellular cation homeostasis	P	1	136	17	6210	0.0588235	0.0219002	over	G3V1D1	Q8TD43, Q16864, P57729, H3BLV0, P19174, P18085, A0A1B0GW73, Q49AE1, B7Z4M5, Q5SWX3, G3V1D1, P16615, A8KA62, Q59G44, P50897, Q8NE86, B2RAH2, B2R7U4, A0A0S2Z5C8, B2R983, D6R938, Q14571, H7C2Z6, P22694, B2RDW0, Q14573, B2R7M1, Q12797, B7ZLE0, B2R5I8, Q12955, A0A140T8Z0, H0Y953, E7ES08, A0A0S2Z3Y4, A0A0U1RRH1, B3KRK7, P42858, Q9HC07, Q9NWR8, P30519, H3BPW1, B4E2J2, C9JAX1, P02795, C9J1Z8, P04732, B2R…	0.314037	0.621302	0.00735294
GO:0051252	regulation of RNA metabolic process	P	4	1042	17	6210	0.235294	0.167794	over	B4DXI2, A0A1B0GVI7, Q5JSB5, Q96AE4	B2RAH5, Q9NQU5, Q9BRZ2, B2RAH2, O00148, Q68E09, H3BV98, E7ETD6, H3BT57, A8K2R3, B3KRB7, H0YN81, B2R506, Q92974, A0A024R669, Q9H4L7, A0A024R5U7, H0Y6H0, Q5VTR2, S4R3H4, C8C069, E9PGT3, F8VZJ2, P0CJ79, B2RAI2, P51116, O60216, Q96EB1, P62487, A0A0C4DFT3, B2R8X4, Q8WXA9, Q2VIN3, Q6NX55, A8K6Y1, A0A0A8K8C0, J3QR41, O15405, Q96EB6, A8K103, Q9UKV8, B4DMT1, A0A024R5X6, A0A087WZT0, H6TXS1, B3KVL0, B4DXI2,…	0.315825	0.621748	0.00383877
GO:0008285	negative regulation of cell proliferation	P	1	137	17	6210	0.0588235	0.0220612	over	G3V1D1	P36507, Q6P1J9, B3KS40, A0A024RAV5, Q53SF4, G3V1D1, P12931, P15531, P42224, B2R7U4, H3BT57, Q9UH60, F8VYH9, Q15262, A0A0S2Z4I4, B3KM81, P07996, Q13363, P01111, H0Y5N4, B7ZKK7, Q5T6U8, Q9UII2, P51636, Q53TG4, P10644, C8C069, B3KUR4, E9PGT3, Q8TEN0, P16104, A0A087X1F5, K7ENT6, P67936, Q2MJK0, D7PBN3, B2R5B6, H6WA46, H0Y465, A6NLD2, Q03135, O43815, K7EIU4, A0A0S2Z3V0, B7ZKY2, Q9P119, P25705, Q00534,…	0.315957	0.621748	0.00729927
GO:0006873	cellular ion homeostasis	P	1	138	17	6210	0.0588235	0.0222222	over	G3V1D1	Q8TD43, Q16864, P57729, H3BLV0, P19174, P18085, A0A1B0GW73, Q49AE1, B7Z4M5, Q5SWX3, G3V1D1, P16615, A8KA62, Q59G44, P50897, Q8NE86, B2RAH2, B2R7U4, A0A0S2Z5C8, B2R983, D6R938, Q14571, H7C2Z6, P22694, B2RDW0, Q14573, B2R7M1, Q12797, B7ZLE0, B2R5I8, Q12955, A0A140T8Z0, H0Y953, E7ES08, A0A0S2Z3Y4, A0A0U1RRH1, B3KRK7, P42858, Q9HC07, Q9NWR8, P30519, H3BPW1, B4E2J2, C9JAX1, P02795, C9J1Z8, P04732, B2R…	0.317871	0.623624	0.00724638
GO:0010467	gene expression	P	7	2056	17	6210	0.411765	0.331079	over	K7ER90, B4DXI2, B4DUP5, A0A1B0GVI7, Q16678, Q5JSB5, Q96AE4	Q0VGA5, O75940, B2RAH5, B2RAH2, Q68E09, Q9BYG3, H3BT57, Q68E01, Q92973, A8K2R3, A8K330, Q92974, B2R506, Q9BQ69, A0A024R669, Q9H4L4, A0A024R5U7, D6RBL4, Q9H4L7, O75934, H0Y6H0, B4DVD6, S4R3H4, C8C069, Q8NDV7, B3KY11, P0CJ79, B2RAI2, E9PF10, Q96EB1, P62487, B2R8X4, Q99598, Q8WXA9, A8K6Y1, A0A0A8K8C0, Q9Y285, O15405, Q96EB6, O75937, B4DMT5, Q9UKV8, B4DMT1, A0A024R5X6, A0A087WZT0, Q5T6Z8, B4DVE4, Q9Y…	0.318609	0.623624	0.00340467
GO:0006979	response to oxidative stress	P	1	139	17	6210	0.0588235	0.0223833	over	Q16678	O75306, P23396, P00390, A0A0K2BMD8, Q2NLC8, P10599, A0A0C4DFU1, Q8TCS8, Q5JR08, B2R7U4, Q9BRA2, H3BT57, Q2TAM5, O00151, Q15262, A0A0S2Z4I4, P07237, B4DK69, Q8WWH8, O95168, R4GN43, Q9UI09, H0Y953, C9JFR7, K7ENT6, Q9BYN0, C9JAX1, B4E1P2, P67936, Q96EB6, Q969S3, Q8NBY1, A8MX75, J3KNB5, A0A024RB10, E9PEQ6, Q12846, A0A0S2Z3V0, A0A087WUQ6, A2RQD7, B3KVL0, Q7Z333, A0A0S2Z4G4, G3XAG7, A0A0A0MSS8, P09874,…	0.319781	0.624254	0.00719424
GO:0006790	sulfur compound metabolic process	P	1	140	17	6210	0.0588235	0.0225443	over	Q4G148	P22061, Q9Y305, P08559, P00390, B4DFL1, Q2NLC8, A7E261, P50897, P53007, B2R983, B4DV28, A0A024R8L7, B3KXN9, B2R6K1, Q9UBK8, P10768, O00154, B0QYH2, P11177, P54868, Q96T76, B4E2J2, C9JAX1, Q6Y1H2, Q5T1C6, B4DRV2, O43252, A8K4W7, Q8WXI4, J3KNB5, A8K987, P53384, Q9H7Q4, P31153, Q53GQ0, P51884, O95571, Q96I99, A0A087WUQ6, P23526, Q9NZ01, P09110, Q1RMG2, Q16772, P32929, G3V150, B4DL06, Q9UMS0, Q8NDD3,…	0.321686	0.626306	0.00714286
GO:0009890	negative regulation of biosynthetic process	P	2	424	17	6210	0.117647	0.068277	over	B4DXI2, A0A1B0GVI7	Q9H7S9, Q8N108, Q9UBB5, A5YKK6, H3BV98, H3BT57, E7ETD6, Q8N3U4, A8K2R3, P27348, B3KM81, D6RBL4, Q3SY98, C8C069, Q8NDV7, B2RAI2, P51116, A0A0C4DFT3, H0UI99, H0YNX7, Q9UI10, Q6NX55, A8K6Y1, C9J7T7, J3QR41, Q96EB6, Q2MJK0, Q9UKV8, Q59FM7, Q9NYF8, Q9Y2Y8, B4DLR3, Q9NRY4, Q99471, H6TXS1, Q5T6Z8, Q5T5X7, C9JRJ5, B4DXI2, B3KUJ5, P40429, Q9UJU1, A8K2T5, P63104, B4DL06, A0A0A0MSS8, P26358, B7Z9U0, Q59EJ8,…	0.325146	0.631368	0.00471698
GO:0071407	cellular response to organic cyclic compound	P	1	144	17	6210	0.0588235	0.0231884	over	Q16678	Q9H7S9, P36507, Q5T911, A0A024RAV5, P12931, A5YKK6, B2RAH2, I3L412, Q8TDD1, H3BV98, B4DYQ3, Q2TAM5, P04083, Q14571, P22694, Q14573, E7EMW7, Q04917, P01111, B4DK69, O94874, A0A0A0MRX2, A0A140T8Z0, B0AZR9, P22626, A0A0U1RRH1, Q92841, Q6NX55, C9J7T7, B4E1P2, Q96EB6, A8K103, Q09472, Q59EC0, Q9UKV8, Q03135, Q59F45, H6TXS1, K7EIU4, Q5JQ44, Q53GY5, A2RQD7, P35241, B3KUJ5, O15379, Q9UJU1, Q05D20, O14686,…	0.329255	0.635037	0.00694444
GO:0031323	regulation of cellular metabolic process	P	7	2078	17	6210	0.411765	0.334622	over	K7ER90, B4DXI2, B4DUP5, A0A1B0GVI7, Q16678, Q5JSB5, Q96AE4	E9PJ81, A8K2Q6, B2RAH5, B2RAH2, Q68E09, Q9BYG3, F5GZI3, H3BT57, B4DEA3, Q8N3U4, A8K2R3, Q92974, E7EMW7, B2R506, B4DII5, A8K330, A0A024R669, Q9BQ69, Q9H4L4, A0A024R5U7, D6RBL4, Q9H4L7, Q12834, H0Y6H0, S4R3H4, E9PIX7, C8C069, Q8NDV7, F8WB76, P0CJ79, B3KY11, B2RAI2, P16104, Q96EB1, P62487, B2R8X4, P42858, Q8WXA9, Q9H0C8, A8K6Y1, A0A0A8K8C0, O15405, A8K321, Q96EB6, P10809, B4DMT5, Q9UKV8, B4DMT1, A0A…	0.330077	0.635037	0.00336862
GO:0015980	energy derivation by oxidation of organic compounds	P	1	145	17	6210	0.0588235	0.0233494	over	Q9UDW1	Q59GM9, O75306, P08559, Q7KZN9, K9J7I2, B4DFL1, F8VYY9, Q9UEH5, O43678, O43837, B4DEZ3, Q9UDW1, Q8N183, P13073, P36871, O14949, P22695, E7EVY0, B2RDW0, P20674, O95168, R4GN43, P28331, Q6IB91, B4DDQ8, H0UIA1, Q9UI09, O14561, P11216, P11177, O95167, Q96HY7, C9JFR7, P38117, O75380, F8W031, P47985, A8K168, B3KPX1, Q9BTT5, F1B5L2, B4DRV2, Q96DP0, A8K4W7, A0A059QFD5, O75489, Q9H7Q4, B4DJV2, O95298, A8K…	0.331135	0.635037	0.00689655
GO:0006631	fatty acid metabolic process	P	1	145	17	6210	0.0588235	0.0233494	over	Q16678	P28288, P08559, Q8IZ83, Q9H845, A8MXV4, F8VYY9, B4DFL1, O15121, A0A1B0GTR1, P50416, A0A024R8L7, B4DJK7, P43155, P49137, B2R6K1, B4DMQ7, P24752, O75828, B4DK69, Q9UKU7, H0UIA1, O14561, B2RB23, Q4G1C4, O00154, F8WEV0, Q8N8N7, P11177, P38117, A0A1B0GTB8, P14174, P30084, Q6Y1H2, B3KPX1, Q96EB6, Q5T1C6, Q68CS2, Q9Y2Y8, Q8WXI4, Q08426, H0YHN9, P51648, Q53GQ0, H6TXS1, A0A087WUQ6, Q9NZ01, P09110, B2R761,…	0.331135	0.635037	0.00689655
GO:0006412	translation	P	2	430	17	6210	0.117647	0.0692432	over	K7ER90, B4DUP5	Q0VGA5, Q92615, O75822, B2RBJ8, Q8IXM3, H0YDD8, A5YKK6, O00148, A7BI36, H3BV98, H3BT57, A0A087WXM6, Q9HBH1, P07996, B2RCM2, D6RBL4, Q9NQ50, Q9NRX2, Q9Y399, Q8NDV7, E9PGT3, F8VZJ2, P51116, P62241, Q9UI10, Q9Y285, C9J7T7, B4DMT5, P25398, Q9UKV8, Q9Y2Y8, C9JRJ5, P12081, O60783, P40429, Q6IQ30, Q8N442, K7EKI4, Q9Y2Z4, Q6FHK1, B7Z9U0, Q9BQ48, A0A024R326, Q9NZI8, P08708, P26373, Q08ES8, E9PE17, Q2L6I2,…	0.331361	0.635037	0.00465116
GO:0051726	regulation of cell cycle	P	2	433	17	6210	0.117647	0.0697262	over	B4DXI2, Q5JSB5	I3L4A2, Q9H7S9, A5YKK6, O00148, A0A0A0MSQ3, O60566, Q5JR08, H3BT57, F8VYH9, H0YFI1, Q68E01, Q53S54, Q8N3U4, Q9ULW0, P27348, P07996, A8K4T6, Q12834, B4E0W3, Q5VTR2, E9PIX7, C8C069, E9PGT3, J3QS66, A0A0C4DFT3, P14174, A8K6Y1, J3QR41, Q2MJK0, Q96EB6, Q9UK58, A0A024R4V8, A8MX75, A0A024RB10, Q9NQW6, H6TXS1, Q9P119, B4DXI2, K7ES89, P40306, P61289, B4DL06, P63104, B7Z9U0, F5H2U8, Q9UBE0, P31946, A0A024R…	0.334465	0.638445	0.00461894
GO:0045321	leukocyte activation	P	1	147	17	6210	0.0588235	0.0236715	over	A0A1B0GVI7	Q96L92, B4DLX6, H3BLV0, O14672, P15529, P12931, Q53RD8, Q05209, P42345, P04083, B4DPW9, P27986, P07996, Q14451, P27487, Q5F2F8, P78536, Q16512, K7EKE8, P12429, Q53TG4, N1NSB5, P10644, E7ES08, A0A0S2Z3Y4, A8K3B6, J3QRU4, A0A090MEX8, B3KRK7, P14174, P09382, A0A0C4DGV9, Q08945, O43290, H3BPW1, O15405, P42338, P10809, Q15833, Q15836, Q9Y2Y8, O95219, Q12846, Q06124, Q03135, Q9BR76, Q96HP0, Q3KRG8, P51…	0.334879	0.638445	0.00680272
GO:0055080	cation homeostasis	P	1	148	17	6210	0.0588235	0.0238325	over	G3V1D1	Q69YM4, Q8TD43, Q16864, P57729, H3BLV0, P19174, P18085, A0A1B0GW73, Q49AE1, B7Z4M5, Q5SWX3, G3V1D1, P16615, A8KA62, Q59G44, P50897, B3KXW8, Q8NE86, B2RAH2, B2R7U4, A0A0S2Z5C8, B2R983, Q96T83, D6R938, Q14571, H7C2Z6, P22694, B2RDW0, Q14573, B2R7M1, Q12797, B7ZLE0, B2R5I8, Q12955, A0A140T8Z0, H0Y953, E7ES08, A0A0S2Z3Y4, B2R9R2, A0A0U1RRH1, B3KRK7, P42858, Q9HC07, Q9NWR8, P30519, H3BPW1, B4E2J2, C9J…	0.336744	0.639123	0.00675676
GO:0060255	regulation of macromolecule metabolic process	P	7	2093	17	6210	0.411765	0.337037	over	K7ER90, B4DXI2, B4DUP5, A0A1B0GVI7, Q16678, Q5JSB5, Q96AE4	E9PJ81, A8K2Q6, B2RAH5, B2RAH2, Q68E09, F5GZI3, H3BT57, Q92973, B4DEA3, Q8N3U4, A8K2R3, Q92974, E7EMW7, B2R506, B4DII5, A8K330, A0A024R669, Q9BQ69, Q9H4L4, A0A024R5U7, D6RBL4, Q9H4L7, Q12834, H0Y6H0, S4R3H4, E9PIX7, C8C069, Q8NDV7, F8WB76, B3KY11, P0CJ79, B2RAI2, P16104, Q96EB1, P62487, B2R8X4, Q99598, P42858, Q8WXA9, Q9H0C8, A8K6Y1, A0A0A8K8C0, O15405, A8K321, Q96EB6, P10809, B4DMT5, A8K2S7, Q9U…	0.337966	0.639123	0.00334448
GO:0098771	inorganic ion homeostasis	P	1	149	17	6210	0.0588235	0.0239936	over	G3V1D1	Q69YM4, Q8TD43, Q16864, P57729, H3BLV0, P19174, P18085, A0A1B0GW73, Q49AE1, B7Z4M5, Q5SWX3, G3V1D1, P16615, A8KA62, Q59G44, P50897, B3KXW8, Q8NE86, B2RAH2, B2R7U4, A0A0S2Z5C8, B2R983, Q96T83, D6R938, Q14571, H7C2Z6, P22694, B2RDW0, Q14573, B2R7M1, Q12797, B7ZLE0, B2R5I8, Q12955, A0A140T8Z0, H0Y953, E7ES08, A0A0S2Z3Y4, B2R9R2, A0A0U1RRH1, B3KRK7, P42858, Q9HC07, Q9NWR8, P30519, H3BPW1, B4E2J2, C9J…	0.338604	0.639123	0.00671141
GO:0098772	molecular function regulator	F	2	438	17	6210	0.117647	0.0705314	over	B4DUP5, Q05BX6	O95433, M0QZS0, B2RAH5, Q5VV41, Q68E09, Q53RT9, F8VYH9, H0YFI1, B2R6S9, P27348, A1A4S6, Q92974, B4DL02, Q12834, B4E0W3, Q59EH0, Q5T123, Q5JVZ8, Q3SY98, C8C069, E9PGT3, J3QS66, Q96EB1, A0A0C4DFT3, B3KUI2, Q9UI10, O15400, Q05BX6, Q2MJK0, Q8N335, P07602, P50395, A8K103, Q9UK58, Q13813, Q9NRY4, Q12846, Q5T0N5, Q9P119, P61289, P63104, Q9UJU6, P62258, Q12972, Q59GN8, Q9UBE0, P31946, Q9H9T3, P07737, B7Z…	0.339632	0.639123	0.00456621
GO:0044702	single organism reproductive process	P	1	150	17	6210	0.0588235	0.0241546	over	B4DUP5	B4DPP0, F8VYY9, A6NML8, Q53SF4, A0A024RAV4, J3QLB5, P63167, P42345, Q8TAF3, E7ETD6, Q9BUG9, P43034, P22694, A0A0S2Z5K8, H7C212, Q96DA6, B4DYY5, Q96HA1, P49770, B4DK69, H0Y5N4, Q8WWH8, Q4G0I1, A0A0D9SG71, K7EKE8, Q96CW5, O75534, P55316, O60216, A4LAA3, B3KSM6, B3KRK7, Q9UI10, Q8N2Z9, J3QR41, A8K3S1, P07602, O75525, B4DEL2, A0A024RB10, B0AZQ4, Q06124, Q59F45, O95453, H3BRX7, P62891, Q9NR09, Q7Z333,…	0.340459	0.639123	0.00666667
GO:0008047	enzyme activator activity	F	1	150	17	6210	0.0588235	0.0241546	over	Q05BX6	P36507, O95433, F8VYY9, I3L412, Q59E87, Q53RT9, Q9UH60, P46940, A0A0D9SF70, A9UK01, B2RDW0, P25685, A1A4S6, A0A0S2Z5K3, B4E324, B4DH07, X5D7Q2, B4E0W3, Q59EH0, Q5T123, C8C069, P51511, F8VNZ0, J3QS66, Q9UBT2, Q8NFQ8, P35251, H3BPW1, A0A0C4DGN6, P60983, P42574, Q05BX6, P07602, A8K103, F8W9Y7, Q9NRY4, H0Y465, Q12846, B4DLZ1, A0A0S2Z3V0, A2RQD7, E7ESY0, P11274, A0A0A0MSK5, Q15042, B4DIC3, A0A0A0MSK6,…	0.340459	0.639123	0.00666667
GO:0043043	peptide biosynthetic process	P	2	440	17	6210	0.117647	0.0708535	over	K7ER90, B4DUP5	Q0VGA5, Q92615, O75822, B2RBJ8, Q8IXM3, H0YDD8, A5YKK6, O00148, A7BI36, H3BV98, H3BT57, A0A087WXM6, Q9HBH1, P07996, B2RCM2, D6RBL4, Q9NQ50, Q9NRX2, Q9Y399, Q8NDV7, E9PGT3, F8VZJ2, P51116, P62241, Q9UI10, Q9Y285, C9J7T7, B4DMT5, P25398, Q9UKV8, Q9Y2Y8, C9JRJ5, P12081, O60783, P40429, Q6IQ30, Q8N442, K7EKI4, Q9Y2Z4, Q6FHK1, B7Z9U0, Q9BQ48, A0A024R326, Q9NZI8, P08708, P26373, Q08ES8, E9PE17, Q2L6I2,…	0.341696	0.639809	0.00454545
GO:2001233	regulation of apoptotic signaling pathway	P	1	152	17	6210	0.0588235	0.0244767	over	Q5JSB5	P23396, Q5JSB5, Q86TM6, Q53SF4, P12931, O43715, Q96HI4, B4DEZ3, Q8WWQ0, P63167, B2R7U4, H3BT57, Q2TAM5, P27348, A8K2R3, E9PNQ9, P07996, P07237, Q04917, Q92974, C9J185, Q5F2F8, Q7Z6J0, Q2QL34, B2RB23, Q53TG4, Q9Y4L1, A0A0S2Z3Y4, B3KSM6, B3KRK7, B3KNC3, P42858, P14174, Q6NX55, A5YM53, C9JAX1, Q96EB6, B7Z454, Q6LCB0, D7PBN3, H6WA46, Q9NYF8, B4DEL2, O75489, E9PEQ6, P12236, Q12846, Q03135, H6TXS1, P13…	0.344155	0.641141	0.00657895
GO:0055082	cellular chemical homeostasis	P	1	152	17	6210	0.0588235	0.0244767	over	G3V1D1	H0YDD9, Q8TD43, Q16864, P57729, H3BLV0, P19174, P18085, A0A1B0GW73, Q49AE1, B7Z4M5, Q5SWX3, G3V1D1, P16615, A8KA62, Q59G44, P50897, Q8NE86, B2RAH2, B2R7U4, A0A0S2Z5C8, B2R983, D6R938, Q14571, H7C2Z6, P22694, E9PB90, B2RDW0, Q14573, B2R7M1, Q12797, B7ZLE0, B3KT70, B2R5I8, Q12955, A0A140T8Z0, H0Y953, B4DG62, E7ES08, A0A0S2Z3Y4, A0A0U1RRH1, B3KRK7, P42858, Q9HC07, Q9NWR8, P30519, H3BPW1, B4E2J2, C9J…	0.344155	0.641141	0.00657895
GO:0009986	cell surface	C	1	153	17	6210	0.0588235	0.0246377	over	Q9BYH2	Q96GX5, H3BLV0, O14672, Q49AE1, P15529, O15484, Q53SF4, A0A0J9YY65, Q6ICS0, Q5JR08, Q9BUG9, P04083, Q15262, H7C0V9, P07355, P07237, P07996, P27487, P78536, Q13641, Q16512, Q16513, Q9BS26, Q9UII2, O75379, K7EKE8, Q9HDC9, N1NSB5, C8C069, E7ES08, O43847, A0A024R0K5, A0A090MEX8, B4DWN1, A0A024R8K7, P14174, A0A1B0GTB0, B4DU18, Q96IB4, A5YM53, B2R7N6, P10809, B2RD79, X2KXS7, Q6YHK3, O75487, P10696, Q12…	0.345995	0.642938	0.00653595
GO:0044445	cytosolic part	C	1	156	17	6210	0.0588235	0.0251208	over	A0A1B0GVI7	P23396, C9K025, P62917, A0A0K2BMD8, P62081, P18124, P11441, H0YDD8, Q6QNY0, H7C5G2, P62750, A0A024RCR6, A0A087WXM6, Q9UH60, P46783, I3L3P7, H3BN98, B3KRB7, P62753, B3KM81, B4DMQ7, E7ETK0, X5D7Q2, S4R3X7, P46781, P36578, Q4G1C4, Q86YV9, P51116, F8VNZ0, Q96T76, K7EJT5, Q59GT1, P63173, E9PL57, P62241, P62888, P61313, P42574, P60866, P46779, P46778, Q6LCB0, D3DWY0, P25398, F5H136, O95295, Q8NI62, Q96…	0.351487	0.651494	0.00641026
GO:0040007	growth	P	1	157	17	6210	0.0588235	0.0252818	over	Q05BX6	F2Z2V0, B3KS40, O14672, H0Y6I0, A8K724, Q96K76, Q53SF4, Q5U602, P50897, Q8TCS8, H3BPE1, B4DEZ3, P42345, Q96T83, A0A1B0GUC3, H3BT57, Q9UH60, H0YFI1, Q9Y2X3, P46940, Q9BSK2, P07477, Q12792, B7Z4U3, P22059, H0Y5N4, Q5F2F8, P78536, O14681, P58546, C8C069, E9PGT3, B4DE20, B0AZR9, P67775, Q9NPD3, Q6NX55, A5YM53, C9JAX1, Q05BX6, P02795, Q2MJK0, Q96EB6, A0A0A0MSJ1, P22466, P07602, Q9Y2Q5, P04732, B4DEL2,…	0.353309	0.65322	0.00636943
GO:0050801	ion homeostasis	P	1	160	17	6210	0.0588235	0.0257649	over	G3V1D1	Q69YM4, Q8TD43, Q16864, P57729, H3BLV0, P19174, P18085, A0A1B0GW73, Q49AE1, B7Z4M5, Q5SWX3, G3V1D1, P16615, A8KA62, P12931, Q59G44, P50897, B3KXW8, Q8NE86, B2RAH2, B2R7U4, A0A0S2Z5C8, B2R983, Q96T83, D6R938, Q14571, H7C2Z6, P22694, B2RDW0, Q14573, B2R7M1, Q12797, B7ZLE0, B2R5I8, Q12955, A0A140T8Z0, H0Y953, E7ES08, A0A0S2Z3Y4, B2R9R2, A0A0U1RRH1, B3KRK7, P42858, Q9HC07, Q9NWR8, P30519, H3BPW1, B4E…	0.358743	0.660758	0.00625
GO:0043604	amide biosynthetic process	P	2	457	17	6210	0.117647	0.073591	over	K7ER90, B4DUP5	Q0VGA5, Q92615, O75822, B2RBJ8, Q8IXM3, H0YDD8, A5YKK6, O00148, A7BI36, H3BV98, H3BT57, A0A087WXM6, Q9HBH1, P07996, B2RCM2, D6RBL4, Q9NQ50, Q9NRX2, Q9Y399, Q8NDV7, E9PGT3, F8VZJ2, P51116, P62241, Q9UI10, Q9Y285, C9J7T7, B4DMT5, P25398, Q9UKV8, Q9Y2Y8, C9JRJ5, P12081, O60783, P40429, Q6IQ30, Q8N442, K7EKI4, Q9Y2Z4, Q6FHK1, B7Z9U0, Q9BQ48, A0A024R326, Q9NZI8, P08708, P26373, Q08ES8, E9PE17, Q2L6I2,…	0.359186	0.660758	0.00437637
GO:0051172	negative regulation of nitrogen compound metabolic process	P	2	459	17	6210	0.117647	0.073913	over	B4DXI2, A0A1B0GVI7	Q9H7S9, Q8N108, Q9UBB5, A5YKK6, H3BV98, H3BT57, E7ETD6, O00273, Q8N3U4, A8K2R3, P27348, B3KM81, E7EMW7, D6RBL4, Q3SY98, Q5VTR2, S4R3H4, C8C069, Q8NDV7, B2RAI2, P51116, A0A0C4DFT3, H0UI99, Q9UI10, Q6NX55, A8K6Y1, C9J7T7, J3QR41, Q96EB6, Q2MJK0, Q9UKV8, Q59FM7, Q9NYF8, Q9Y2Y8, B4DLR3, Q9NRY4, Q99471, H6TXS1, Q5T5X7, C9JRJ5, B4DXI2, P18615, B3KUJ5, P40429, Q6IQ30, Q9UJU1, A8K2T5, P63104, B4DL06, P26…	0.361236	0.661571	0.0043573
GO:0009893	positive regulation of metabolic process	P	4	1110	17	6210	0.235294	0.178744	over	A0A1B0GVI7, Q5JSB5, Q96AE4, G3V1D1	B2RAH5, Q9NQU5, B2RAH2, O00148, Q68E09, Q5JR08, H3BT57, E7ETD6, H0YN81, A8K2R3, B3KRB7, Q92974, B2R506, B4DL02, A0A024R669, A8K4T6, Q9H4L7, Q12834, Q5VTR2, E9PIX7, C8C069, E9PGT3, P51116, B1APR7, P62487, B2R8X4, P14174, Q2VIN3, O15405, J3QR41, Q96EB6, P10809, Q9H2G2, B4E0X8, A8K103, Q9UKV8, F5H136, A0A024R5X6, H6TXS1, B4DXI2, B2R761, H0YJ25, Q6MZZ4, B4DL06, P63104, B2R6U9, P26358, F8WFB0, Q59EJ8,…	0.36156	0.661571	0.0036036
GO:1903829	positive regulation of cellular protein localization	P	1	163	17	6210	0.0588235	0.026248	over	Q5JSB5	H0YNH5, B3KS40, Q5JSB5, A0A0A0MQU3, Q5VV41, Q8IVQ8, B2R7D7, B2RAH2, Q96HI4, P63167, Q5JR08, H3BT57, A0A075B784, P27986, P27348, Q05DU1, E7EMW7, Q04917, A8K330, B5BU25, Q5F2F8, Q12797, Q53F35, A0A0C4DGE4, Q01081, Q16512, O96019, Q01082, A0A024R9U8, A0A140TA28, P84095, B3KSM6, A0A0C4DFT3, Q9Y3B1, P12270, H3BPW1, P46779, Q8N335, A0A024R4V8, F5H136, Q9BVP2, O75369, Q12846, P33176, Q59F45, P35241, O15…	0.364134	0.661571	0.00613497
GO:0098763	mitotic cell cycle phase	P	1	163	17	6210	0.0588235	0.026248	over	Q5JSB5	Q96GX5, Q9Y266, Q9UPN1, Q5JSB5, B0AZS5, A0A0A0MQU3, B7Z4E5, Q6FHU0, O60566, P62195, Q9UH60, F8VYH9, Q9BW27, P43034, Q8N3U4, P0DJD0, Q8WUM0, D6RHI7, A8K4T6, Q9BU64, P62805, Q12834, B3KXX5, Q8NG31, B4DL80, O60216, A8K8D2, B4DUJ0, Q8N2Z9, P42695, J3QR41, Q2MJK0, X5DR54, Q29RF7, A0A024RD28, Q9NXD3, B3KMS0, A8K984, Q13257, B3KN47, Q8WVM7, A0A024RB10, A0A024RBR1, B0AZQ4, P57740, Q5T179, P35998, H0Y589,…	0.364134	0.661571	0.00613497
GO:0022403	cell cycle phase	P	1	163	17	6210	0.0588235	0.026248	over	Q5JSB5	Q96GX5, Q9Y266, Q9UPN1, Q5JSB5, B0AZS5, A0A0A0MQU3, B7Z4E5, Q6FHU0, O60566, P62195, Q9UH60, F8VYH9, Q9BW27, P43034, Q8N3U4, P0DJD0, Q8WUM0, D6RHI7, A8K4T6, Q9BU64, Q12834, P62805, B3KXX5, Q8NG31, B4DL80, O60216, A8K8D2, B4DUJ0, Q8N2Z9, J3QR41, P42695, Q2MJK0, X5DR54, Q29RF7, A0A024RD28, Q9NXD3, B3KMS0, A8K984, Q13257, B3KN47, Q8WVM7, A0A024RBR1, A0A024RB10, B0AZQ4, P57740, Q5T179, P35998, H0Y589,…	0.364134	0.661571	0.00613497
GO:0044848	biological phase	P	1	165	17	6210	0.0588235	0.02657	over	Q5JSB5	Q96GX5, Q9Y266, Q9UPN1, Q5JSB5, B0AZS5, A0A0A0MQU3, B7Z4E5, Q6FHU0, O60566, P62195, Q9UH60, F8VYH9, Q9BW27, P43034, Q8N3U4, P0DJD0, Q8WUM0, D6RHI7, A8K4T6, Q9BU64, Q12834, P62805, B3KXX5, Q8NG31, B4DL80, O60216, A8K8D2, B4DUJ0, Q8N2Z9, J3QR41, P42695, Q2MJK0, X5DR54, Q29RF7, A0A024RD28, P22466, Q9NXD3, B3KMS0, A8K984, Q13257, B3KN47, Q8WVM7, A0A024RBR1, A0A024RB10, B0AZQ4, P57740, Q5T179, P35998,…	0.367705	0.664767	0.00606061
GO:0019080	viral gene expression	P	1	165	17	6210	0.0588235	0.02657	over	K7ER90	J9R021, P23396, C9K025, P62917, P62081, A8K4M5, P18124, P35658, P13984, C9JLU1, Q53FD7, P62750, H3BV98, A0A087WXM6, P46783, Q9BW27, P0DJD0, I3L3P7, H3BN98, P62753, P62875, Q8WUM0, Q96HA1, O15371, E7ETK0, P46781, P36578, P24928, K7EJT5, P62487, P63173, P62241, P12270, P62888, P61313, P60866, P46779, P46778, B4DMT5, Q09472, P25398, Q8TEM1, P57740, Q8NI62, Q53HS1, C9JZB0, Q96IR1, P62891, K7EL20, P18…	0.367705	0.664767	0.00606061
GO:0006839	mitochondrial transport	P	1	166	17	6210	0.0588235	0.0267311	over	Q5JSB5	H0YNH5, O75947, P07900, B3KS40, Q5JSB5, O96008, A0A024R2H7, A0A0A0MQU3, P50416, Q8NE86, Q8TCS8, Q99766, Q96HI4, B4DEZ3, P63167, Q96EK5, H3BST5, Q9BSK2, A0A075B784, B4DUQ5, P27348, Q15785, Q04917, A8K330, B5BU25, Q5F2F8, Q2QL34, A0A0A6YYL4, Q01081, P48047, Q9UII2, A0A097PY54, B2RB23, O96019, A0A024R9U8, A0A1B0GTB8, A0A140TA28, F8WCQ4, B3KSM6, Q6KCM7, Q9Y3B1, B3KRK7, Q9NWR8, Q16762, Q5T1C6, P46779,…	0.369483	0.666265	0.0060241
GO:0050794	regulation of cellular process	P	11	3580	17	6210	0.647059	0.57649	over	B4DXI2, K7ER90, B4DUP5, A0A1B0GVI7, Q16678, Q5JSB5, B4DWS8, Q96AE4, G3V1D1, B7ZL14, Q05BX6	E9PJ81, H0Y6I0, A0A0K2BMD8, B2RAH5, Q8NE86, B2RAH2, F5GZI3, B2R983, H3BT57, H3BST5, B4DEA3, Q8N3U4, B4DMQ7, E7EMW7, A0A024R669, B4DN44, Q9H4L5, Q9H4L4, Q9H4L7, A0A024R5U7, Q9UKU7, K7EKE8, H0Y6H0, B4DVD6, E9PIX7, S4R3H4, H7C5H6, Q8NDV7, B3KY11, P0CJ79, B2RAI2, P62487, B2R8X4, P42858, Q8WXA9, A8K6Y1, P61158, Q05BX6, Q9UKV5, P07602, B4DMT5, Q9UKV8, B4DMT1, A0A024R5X6, A0A087WZT0, Q5T6Z8, B7ZKY2, B4D…	0.370361	0.666265	0.00307263
GO:0015075	ion transmembrane transporter activity	F	1	167	17	6210	0.0588235	0.0268921	over	Q9BYH2	Q69YM4, O75947, H0YDD9, Q8TD43, Q8NCD8, A0A024R798, Q7KZN9, Q16864, Q8WWI5, Q49AE1, Q9Y2G3, P16615, Q59G44, B1AMV8, B3KXW8, Q8NE86, B2RAH2, P53007, Q9H0U3, A0A0S2Z5C8, Q96T83, P13073, O14949, Q14571, Q59GD7, Q9NWI4, B2RDW0, Q14573, B2R7M1, P20674, P48047, Q9Y277, A0A097PY54, Q6P4A7, D6RIZ4, H0Y953, D6R9S7, A0A0U1RRH1, B6ETL5, Q9NWR8, A5YM53, P47985, B2R7N6, Q8N697, E9PN17, B4DL14, A0A059QFD5, Q8N…	0.371256	0.666265	0.00598802
GO:1903047	mitotic cell cycle process	P	2	470	17	6210	0.117647	0.0756844	over	B4DXI2, Q5JSB5	I3L4A2, B2RAH5, A5YKK6, O60566, Q5JR08, B3KUH0, F8VYH9, Q96JM3, Q9BVA1, Q53S54, Q68E01, Q9ULW0, A8K4T6, Q12834, Q12955, E9PIX7, P42858, J3QR41, Q9ULX6, Q2MJK0, Q9H5M4, P27694, Q86SY9, A8MX75, A0A024RBR1, A0A024RB10, Q9NQW6, Q6PJQ8, Q9P119, Q9Y2Z0, B4DXI2, P40306, A8K9A5, P61289, P62136, P62258, B7Z9U0, F5H2U8, A0A024R201, P31947, Q99460, H3BMF1, A0A0C4DGX4, P18754, Q96GD0, A5YRV2, P04350, O14578,…	0.372478	0.666304	0.00425532
GO:0032774	RNA biosynthetic process	P	4	1127	17	6210	0.235294	0.181481	over	B4DXI2, A0A1B0GVI7, Q5JSB5, Q96AE4	B2RAH5, Q9NQU5, Q9BRZ2, B2RAH2, O00148, Q68E09, H3BV98, E7ETD6, H3BT57, A0A087WXM6, B3KRB0, Q68E01, A8K2R3, B3KRB7, H0YN81, B2R506, Q92974, A0A024R669, Q9H4L7, H0Y6H0, Q5VTR2, B4DVD6, Q05048, C8C069, E9PGT3, F8VZJ2, P0CJ79, B2RAI2, O60216, P62487, Q96EB1, A0A0C4DFT3, B2R8X4, A0A087WXN4, P62241, Q2VIN3, Q6NX55, A8K6Y1, A0A0A8K8C0, J3QR41, O15405, Q96EB6, B4E0X8, A8K103, Q9UKV8, B4DMT1, A0A024R5X6,…	0.373094	0.666304	0.00354925
GO:0042802	identical protein binding	F	2	473	17	6210	0.117647	0.0761675	over	B7ZL14, Q05BX6	C9JBI3, F2Z2V0, Q562L9, B2R7U4, H3BV98, H3BT57, Q53SV2, B3KRB7, P27348, B4DMQ7, A0A140VKC0, B4DKM6, B2R506, P27487, K7EKE8, O00154, B7Z4N7, Q8IWJ2, P19623, P51116, A0A024R0K5, P42858, O15405, Q05BX6, Q96EB6, Q8N335, Q9H2G2, A0A024RBR1, B4E0X0, Q9BR76, A8KA01, B7Z3I9, P15104, Q3KRG8, B2R6U8, P12081, Q99584, Q9Y295, P61289, P63104, Q9Y2Z4, Q9C005, P54886, D6RCP9, P31946, Q13707, B4DUD6, F8WAX7, A0A…	0.375533	0.669033	0.00422833
GO:0050790	regulation of catalytic activity	P	3	800	17	6210	0.176471	0.128824	over	B4DUP5, B4DWS8, G3V1D1	E9PJ81, M0QZS0, B2RAH5, Q9NQU5, Q68E09, Q9BYG3, Q5JR08, H3BV98, H3BT57, B3KRB7, B4DL02, A8K4T6, A8K556, Q12834, B4E0W3, Q59EH0, Q5T123, C8C069, E9PGT3, Q96EB1, A0A0C4DFT3, P42858, Q6NX55, J3QR41, Q96EB6, P10809, A8K103, F5H136, Q12846, A8KAQ3, P63104, P62258, F8WFB0, Q59GN8, A8MW49, P31946, A0A024R201, P31947, P18754, A0A024RBQ5, P19838, F2Z357, B4DKP8, Q9UL15, Q9H2M9, Q92538, B4DZG7, Q71UM5, Q2T…	0.377881	0.671585	0.00375
GO:0010557	positive regulation of macromolecule biosynthetic process	P	2	477	17	6210	0.117647	0.0768116	over	A0A1B0GVI7, Q5JSB5	Q92615, P67809, B2RAH5, O00268, O00148, B2RAH2, B2R7U4, E7ETD6, F8VYH9, P49137, A8K2R3, B3KRB7, H0YN81, P07996, B2R506, Q92974, A0A024R669, Q9H4L7, Q5VTR2, C8C069, E9PGT3, P62487, B2R8X4, Q92841, Q2VIN3, J3QR41, O15405, C9J7T7, Q96EB6, Q9ULX6, A8K3S0, Q9UK58, A8K103, Q9UKV8, F5H136, A8MX75, Q9NYF8, Q9Y2Y8, A0A024R5X6, H6TXS1, P18615, B4DXI2, H0YJ25, B3KUJ5, Q6MZZ4, O14686, B4DL06, P63104, B2R6U9,…	0.379601	0.673012	0.00419287
GO:0008284	positive regulation of cell proliferation	P	1	174	17	6210	0.0588235	0.0280193	over	G3V1D1	Q9H7S9, Q8TD43, Q96RE7, H3BLV0, O14672, P15529, A0A024RAV5, Q53SF4, G3V1D1, P12931, B4DIZ6, P15531, P42224, P42345, B2R7U4, F8VYH9, Q2TAM5, Q9HBH1, P04083, Q53S54, I3L3P7, Q9BSK2, H3BN98, H7C212, P01111, B4DK69, H0Y5N4, B4DL02, P27487, O94874, P78536, A0A0D9SG71, P46781, P33981, A0A169TED2, Q53TG4, C8C069, Q9ULG6, E7ES08, P57735, A0A0S2Z3Y4, B7Z5H7, P84095, A0A090MEX8, M0QXF7, P14174, Q5JSL0, A5Y…	0.38354	0.678357	0.00574713
GO:0045935	positive regulation of nucleobase-containing compound metabolic process	P	2	485	17	6210	0.117647	0.0780998	over	A0A1B0GVI7, Q5JSB5	P67809, B2RAH5, O00268, A5YKK6, O00148, B2RAH2, H3BT57, E7ETD6, A8K2R3, B3KRB7, H0YN81, B2R506, Q92974, A0A024R669, Q9H4L7, Q5VTR2, C8C069, E9PGT3, B1APR7, P62487, B2R8X4, Q92841, Q2VIN3, J3QR41, O15405, Q96EB6, Q9ULX6, A8K3S0, Q9UK58, A8K103, Q9UKV8, F5H136, A8MX75, Q9NYF8, A0A024R5X6, H6TXS1, P18615, B4DXI2, H0YJ25, B3KUJ5, Q6MZZ4, G3XAG7, O14686, B4DL06, P63104, B2R6U9, B7Z9U0, F8WFB0, P26358,…	0.387709	0.683247	0.00412371
GO:0048513	animal organ development	P	3	813	17	6210	0.176471	0.130918	over	B4DUP5, A0A1B0GVI7, Q16678	Q9UEH5, Q5JR08, A0A0A0MTS5, H3BT57, E7ETD6, H0Y6I7, H0YN81, F2Z2U4, A8K4T6, Q9H4L7, Q12834, Q59EH0, P08727, S4R3H4, Q05048, C8C069, P54868, F8VZJ2, B2RAI2, B1APR7, A0A0C4DFT3, B2R8X4, O15405, P67936, Q96EB6, P07602, Q9BRX8, Q06124, P61160, A0A024RDV5, Q9H0B6, B1ALI9, B4DL06, P63104, P62258, B2R6U9, P26358, F8WFB0, B4DMU7, O75911, Q59GN8, F5H2U8, C9JCN8, P31946, A0A024R201, A0A024R684, P31947, Q9N…	0.388166	0.683247	0.00369004
GO:0044033	multi-organism metabolic process	P	1	178	17	6210	0.0588235	0.0286634	over	K7ER90	P36507, J9R021, P23396, C9K025, P62917, P62081, A8K4M5, P18124, P35658, P13984, C9JLU1, Q53FD7, P62750, H3BV98, A0A087WXM6, P46783, Q9BW27, P0DJD0, I3L3P7, H3BN98, P62753, Q8WUM0, P62875, Q96HA1, O15371, E7ETK0, P46781, P36578, K7EJT5, P24928, P62487, P63173, P62241, P12270, P62888, P61313, F2YHL7, P60866, P46779, P46778, B4DMT5, P25398, Q09472, Q8TEM1, P57740, O95292, Q8NI62, Q53HS1, C9JZB0, P11…	0.390457	0.685635	0.00561798
GO:0006518	peptide metabolic process	P	2	494	17	6210	0.117647	0.0795491	over	K7ER90, B4DUP5	Q0VGA5, Q92615, O75822, B2RBJ8, Q8IXM3, H0YDD8, A5YKK6, O00148, A7BI36, H3BV98, B2R983, H3BT57, A0A087WXM6, Q9HBH1, P07996, B2RCM2, D6RBL4, Q9NQ50, Q9NRX2, Q9Y399, Q8NDV7, E9PGT3, F8VZJ2, P51116, P62241, Q9UI10, Q9Y285, C9J7T7, B4DMT5, P25398, Q9UKV8, Q9Y2Y8, J3KNB5, O95571, C9JRJ5, P12081, O60783, P40429, Q6IQ30, Q8N442, K7EKI4, Q9Y2Z4, B2R769, Q6FHK1, B7Z9U0, Q9BQ48, A0A024R326, Q9NZI8, B2RAK1,…	0.396788	0.692026	0.00404858
GO:0033993	response to lipid	P	1	182	17	6210	0.0588235	0.0293076	over	A0A1B0GVI7	Q9H7S9, Q5T911, H3BLV0, H7C2I6, B5BTZ6, Q53SF4, P12931, A5YKK6, I3L412, B4DEZ3, Q05209, Q8TDD1, Q02338, B4DYQ3, P17275, P04083, Q5T6L6, Q12792, P07355, P07996, E7EMW7, Q04917, B4DK69, O94874, P78536, A0A087WU84, P12429, B5BTY5, A0A169TED2, A0A0A0MRX2, P54868, E7ES08, A0A0S2Z3Y4, A8K3B6, Q96RT1, A0A0B4J2A0, Q08945, Q92841, Q6NX55, P42574, Q96EB6, Q9HCY8, H0YLF3, A8K103, Q09472, Q9UN37, A0A024R7L5,…	0.397301	0.692026	0.00549451
GO:0000278	mitotic cell cycle	P	2	495	17	6210	0.117647	0.0797101	over	B4DXI2, Q5JSB5	I3L4A2, B2RAH5, A5YKK6, O60566, Q5JR08, B3KUH0, H3BT57, F8VYH9, Q96JM3, Q9BVA1, Q53S54, Q68E01, Q9ULW0, A8K4T6, Q12834, Q12955, Q5VTR2, E9PIX7, A0A0C4DFT3, P42858, J3QR41, Q9ULX6, Q2MJK0, Q96EB6, Q9H5M4, P27694, Q86SY9, A8MX75, A0A024RBR1, A0A024RB10, Q9NQW6, Q6PJQ8, Q9P119, Q9Y2Z0, B4DXI2, K7ES89, P40306, A8K9A5, P61289, P62136, P62258, B7Z9U0, F5H2U8, Q9UBE0, A0A024R201, P31947, Q99460, H3BMF1,…	0.397794	0.692026	0.0040404
GO:0007417	central nervous system development	P	1	183	17	6210	0.0588235	0.0294686	over	B4DUP5	B4DPP0, P06899, Q6ZMT4, A8K3K1, B4DZC0, P12931, P50897, P12532, P63167, Q562L9, Q5JR08, Q5XKR4, O14949, E7ETD6, F8VYH9, P07195, Q562T9, P62879, B7Z6Y2, P43034, C9J5W6, Q15262, B2R6K4, P27348, B2RDW0, Q04917, B4DUQ1, P49770, Q8NB90, H0Y5N4, H0YLC5, I3VM54, O75530, C8C069, X5DRF3, B4DE20, B2RAI2, P55316, A8K3B6, P84095, B3KSM6, B3KRK7, Q9UI10, B4E335, X5DR54, H6WA46, O75489, A0A024RB10, H0Y465, O75…	0.399001	0.692026	0.00546448
GO:0031328	positive regulation of cellular biosynthetic process	P	2	497	17	6210	0.117647	0.0800322	over	A0A1B0GVI7, Q5JSB5	Q92615, P67809, B2RAH5, O00268, O00148, B2RAH2, B2R7U4, E7ETD6, F8VYH9, P49137, A8K2R3, B3KRB7, H0YN81, P07996, B2R506, Q92974, A0A024R669, Q9H4L7, Q5VTR2, C8C069, E9PGT3, P62487, B2R8X4, Q92841, Q2VIN3, J3QR41, O15405, C9J7T7, Q96EB6, Q9ULX6, A8K3S0, Q9UK58, A8K103, Q9UKV8, F5H136, A8MX75, Q9NYF8, Q9Y2Y8, A0A024R5X6, H6TXS1, P16435, P18615, B4DXI2, H0YJ25, B3KUJ5, Q6MZZ4, O14686, B4DL06, P63104,…	0.399804	0.692026	0.00402414
GO:0043065	positive regulation of apoptotic process	P	1	184	17	6210	0.0588235	0.0296296	over	Q5JSB5	O95831, P23396, Q5JSB5, A8K724, M0QZS0, Q53SF4, Q5VV41, P12931, Q53RD8, O00422, Q96HI4, B4DEZ3, F8WF76, P63167, Q5JR08, H3BT57, Q9UH60, Q9Y3A2, Q9BQG0, B7Z6Y2, E5KN59, P27348, E9PNQ9, B3KM81, P62753, P07996, Q04917, Q92974, B4DK69, P31689, H0Y5N4, C9J185, Q5F2F8, A8K710, Q53F35, A0A0S2Z3I0, Q8IYV2, Q9BRQ8, S4R3H4, C8C069, B4DGW2, C9JFR7, E9PGT3, E7ES08, A0A0S2Z3Y4, P55316, F8VNZ0, B3KRK7, E9PL57,…	0.400696	0.692026	0.00543478
GO:0046034	ATP metabolic process	P	1	184	17	6210	0.0588235	0.0296296	over	Q9UDW1	O75947, B4DJ38, O75306, P08559, Q8IZ83, B4DY91, Q7KZN9, Q16864, B4DFL1, F8VYY9, K9J7I2, Q9UEH5, O43678, B4DEZ3, Q99766, A4UCT0, Q9UDW1, P36871, Q8N183, P13073, O14949, P07195, Q9NTK5, P22695, E9PB90, Q9BSK2, P20674, B3KT70, O95168, R4GN43, S4R3X7, Q5ZEY3, B4DDQ8, H0UIA1, P28331, P48047, Q9UII2, Q9UI09, P04406, O14561, A0A097PY54, P11177, O95167, B4DG62, C9JFR7, O60218, O75380, B3KSM6, P47985, E9P…	0.400696	0.692026	0.00543478
GO:0043068	positive regulation of programmed cell death	P	1	185	17	6210	0.0588235	0.0297907	over	Q5JSB5	O95831, P23396, A8K724, M0QZS0, Q5JSB5, Q53SF4, Q5VV41, P12931, O00422, Q53RD8, F8WF76, Q96HI4, B4DEZ3, P63167, Q5JR08, H3BT57, Q9Y3A2, Q9UH60, B7Z6Y2, Q9BQG0, E5KN59, P27348, P62753, E9PNQ9, B3KM81, P07996, Q92974, Q04917, P31689, H0Y5N4, C9J185, B4DK69, A8K710, Q5F2F8, Q53F35, Q8IYV2, A0A0S2Z3I0, Q9BRQ8, S4R3H4, C8C069, B4DGW2, E9PGT3, C9JFR7, E7ES08, P55316, A0A0S2Z3Y4, F8VNZ0, B3KRK7, E9PL57,…	0.402387	0.693315	0.00540541
GO:0000139	Golgi membrane	C	1	188	17	6210	0.0588235	0.0302738	over	Q4G148	Q9Y3Q3, H3BLV0, B3KUY5, P18085, Q7Z7M9, B3KP69, Q8IVQ6, E9PM62, B4DQA8, Q9NRW7, Q59G44, A8KA68, Q9NS00, Q5U602, Q9H0U4, Q96T83, O00391, B7Z2Y2, O14662, P09496, P48444, H7C0V9, Q9NWI4, P22059, O95721, Q9Y678, P49257, O75379, J3KQ45, A0A024R5M9, N1NSB5, B0AZR9, B3KSN1, A0A090MEX8, Q9HC07, Q96AJ9, Q9H9E3, Q9HC03, B2R758, E9PDF6, D6RF69, H0YLF3, A8K103, H0UID5, Q15836, X2KXS7, Q7Z5G4, A0A024RCT1, Q03…	0.407432	0.700363	0.00531915
GO:0009891	positive regulation of biosynthetic process	P	2	508	17	6210	0.117647	0.0818035	over	A0A1B0GVI7, Q5JSB5	Q92615, P67809, B2RAH5, O00268, B2RAH2, O00148, B2R7U4, E7ETD6, F8VYH9, P49137, A8K2R3, B3KRB7, H0YN81, P07996, B2R506, Q92974, A0A024R669, Q9H4L7, Q5VTR2, C8C069, E9PGT3, P62487, B2R8X4, Q92841, Q2VIN3, J3QR41, O15405, C9J7T7, Q96EB6, Q9ULX6, A8K3S0, Q9UK58, A8K103, Q9UKV8, F5H136, A8MX75, Q9Y2Y8, Q9NYF8, A0A024R5X6, H6TXS1, P16435, P18615, B4DXI2, H0YJ25, B3KUJ5, Q6MZZ4, O14686, B4DL06, P63104,…	0.410813	0.704525	0.00393701
GO:1901135	carbohydrate derivative metabolic process	P	2	512	17	6210	0.117647	0.0824477	over	Q9UDW1, Q4G148	O75947, B4DQ98, Q9UEH5, Q6QNY5, B2RAH2, E7EVH9, P13073, B2R8W4, P08842, A0A140VKC0, Q9Y3Z3, P07996, Q53T76, Q9BQ69, R4GN43, P49257, J3KSI4, P28331, P48047, Q9UI09, O14561, P52209, O00154, C9JFR7, O60218, E7EM50, P49247, A8K3S1, Q96EB6, B2R758, Q8N335, P07602, O95336, B4DL14, D6RF69, Q9H7Q4, H0YHN9, P15104, Q5T6Z8, O60547, B2R7W7, P18859, A8K9A5, P27449, B4DL06, A0A0A0MSS8, Q8N4T8, Q9UHQ9, D6RCP9,…	0.414796	0.709698	0.00390625
GO:1904951	positive regulation of establishment of protein localization	P	1	195	17	6210	0.0588235	0.031401	over	Q5JSB5	H0YNH5, Q8TD43, H0YDD9, B3KS40, Q5JSB5, Q5VV41, Q8NE86, B2R7D7, B2RAH2, Q68E09, Q96HI4, Q5JR08, Q9UK41, A0A075B784, P27348, E7EMW7, A8K330, Q16512, H0YNG9, B5BTY5, A0A169TED2, E7ES08, A0A140TA28, J3QRU4, A0A0C4DFT3, P14174, P09382, P46779, A0A024R4V8, F5H136, O75369, Q12846, Q9UJU1, P63104, P62258, Q9UHQ9, P05556, B2R9K8, Q9UBE0, P31946, Q8IWX8, P31947, H0YMG8, B3KNN8, B4E0H8, B4DMD3, Q8WUJ3, Q14…	0.419049	0.714785	0.00512821
GO:1901576	organic substance biosynthetic process	P	7	2245	17	6210	0.411765	0.361514	over	K7ER90, B4DXI2, B4DUP5, A0A1B0GVI7, Q5JSB5, Q96AE4, Q4G148	Q0VGA5, O75947, B2RAH5, B2RAH2, Q68E09, E7EVH9, B2R983, H3BT57, Q68E01, B4DEA3, Q8N3U4, A8K2R3, B4DMQ7, Q92974, B2R506, A0A024R669, D6RBL4, Q9H4L7, Q6IB91, O14561, H0Y6H0, B4DVD6, C8C069, P54868, Q8NDV7, P0CJ79, B3KY11, B2RAI2, P19623, Q96EB1, P62487, B2R8X4, A8K6Y1, Q9Y285, A0A0A8K8C0, O15405, Q96EB6, Q6NUM7, B4DMT5, P27694, Q86SY9, Q9UKV8, B4DMT1, A0A024R5X6, A0A087WZT0, Q5T6Z8, Q6MZZ4, Q9Y295,…	0.420282	0.714785	0.00311804
GO:0009205	purine ribonucleoside triphosphate metabolic process	P	1	196	17	6210	0.0588235	0.031562	over	Q9UDW1	O75947, B4DY91, Q16864, F8VYY9, K9J7I2, Q9UEH5, O43678, A4UCT0, Q9UDW1, P36871, P13073, P07195, Q9NTK5, P22695, E9PB90, Q9BSK2, B3KT70, R4GN43, S4R3X7, Q5ZEY3, B4DDQ8, P28331, P48047, Q9UI09, O14561, B4DG62, C9JFR7, O60218, O75380, P47985, E9PN17, F1B5L2, B4DL14, Q96DP0, O75489, Q9H7Q4, Q16768, H0YHN9, B4DE36, P25705, P18859, P31040, P56385, P00568, P27449, P56381, Q9NQX3, A0A0S2Z523, A0A059RS35,…	0.420691	0.714785	0.00510204
GO:0009199	ribonucleoside triphosphate metabolic process	P	1	198	17	6210	0.0588235	0.0318841	over	Q9UDW1	O75947, B4DY91, Q16864, F8VYY9, K9J7I2, Q9UEH5, O43678, A4UCT0, Q9UDW1, P36871, P13073, P07195, Q9NTK5, P22695, E9PB90, Q9BSK2, B3KT70, R4GN43, S4R3X7, Q5ZEY3, B4DDQ8, P28331, P48047, Q9UI09, O14561, B4DG62, C9JFR7, O60218, O75380, P47985, E9PN17, F1B5L2, B4DL14, Q96DP0, O75489, Q9H7Q4, Q16768, H0YHN9, B4DE36, P25705, P18859, P31040, P56385, P00568, P27449, P56381, Q9NQX3, A0A0S2Z523, A0A059RS35,…	0.423961	0.714836	0.00505051
GO:0006807	nitrogen compound metabolic process	P	9	2965	17	6210	0.529412	0.477456	over	Q9UDW1, B4DXI2, K7ER90, A0A1B0GVI7, B4DUP5, Q16678, Q5JSB5, Q96AE4, Q4G148	A8K2Q6, Q0VGA5, O75947, O75940, B2RAH5, B2RAH2, Q9BYG3, Q68E09, E7EVH9, P13073, B2R983, H3BT57, B3KXN9, Q68E01, B4DEA3, Q8N3U4, A8K2R3, B4DMQ7, Q92974, E7EMW7, B2R506, B4DII5, A8K330, A0A024R669, Q9BQ69, Q9H4L4, A0A024R5U7, D6RBL4, Q9H4L7, Q9UKU7, O75934, Q12834, O14561, H0Y6H0, P52209, B4DVD6, S4R3H4, Q6QN92, P54868, C8C069, Q8NDV7, B3KY11, P0CJ79, B2RAI2, P19623, P16104, B2R514, P62487, Q96EB1,…	0.425047	0.714836	0.00303541
GO:0009126	purine nucleoside monophosphate metabolic process	P	1	199	17	6210	0.0588235	0.0320451	over	Q9UDW1	O75947, B4DY91, Q16864, F8VYY9, K9J7I2, Q9UEH5, O43678, A4UCT0, Q9UDW1, P36871, P13073, P07195, Q9NTK5, P22695, E9PB90, Q9BSK2, B3KT70, R4GN43, S4R3X7, Q5ZEY3, B4DDQ8, P28331, P48047, Q9UI09, O14561, B4DG62, C9JFR7, O60218, O75380, P22102, P47985, A0A1B0GTJ7, E9PN17, F1B5L2, B4DL14, Q96DP0, O75489, Q9H7Q4, Q16768, H0YHN9, B4DE36, P49915, P25705, P18859, P31040, P56385, P00568, P27449, P56381, A0A…	0.42559	0.714836	0.00502513
GO:0004871	signal transducer activity	F	1	199	17	6210	0.0588235	0.0320451	over	A0A1B0GVI7	P36507, Q9ULV8, A0A024R798, Q8N108, Q9BW34, P19174, B5BTZ6, Q53SF4, C9J8E1, Q9NQU5, B2R7U4, Q5JR08, Q14571, P49137, B3KRB7, Q14573, B4DL02, A8K556, B4DHI1, P08727, A0A087WU84, K7EKE8, B5BTY5, A0A024R5E0, B4DE20, B0AZR9, Q96F46, B4E2J5, P09382, P63218, P60983, P22466, Q9H2G2, Q13136, B2RBL9, A8KAQ3, B3KR49, A8KA01, O94804, B4DL06, P05556, Q59GN8, O15551, K7ERE3, P10586, P17301, Q8N4C8, F5CTF4, Q5K…	0.42559	0.714836	0.00502513
GO:0009167	purine ribonucleoside monophosphate metabolic process	P	1	199	17	6210	0.0588235	0.0320451	over	Q9UDW1	O75947, B4DY91, Q16864, F8VYY9, K9J7I2, Q9UEH5, O43678, A4UCT0, Q9UDW1, P36871, P13073, P07195, Q9NTK5, P22695, E9PB90, Q9BSK2, B3KT70, R4GN43, S4R3X7, Q5ZEY3, B4DDQ8, P28331, P48047, Q9UI09, O14561, B4DG62, C9JFR7, O60218, O75380, P22102, P47985, A0A1B0GTJ7, E9PN17, F1B5L2, B4DL14, Q96DP0, O75489, Q9H7Q4, Q16768, H0YHN9, B4DE36, P49915, P25705, P18859, P31040, P56385, P00568, P27449, P56381, A0A…	0.42559	0.714836	0.00502513
GO:0009144	purine nucleoside triphosphate metabolic process	P	1	200	17	6210	0.0588235	0.0322061	over	Q9UDW1	O75947, B4DY91, Q16864, F8VYY9, K9J7I2, Q9UEH5, P30085, O43678, A4UCT0, Q9UDW1, P36871, P13073, P07195, Q9NTK5, P22695, E9PB90, Q9BSK2, Q9Y3Z3, B3KT70, R4GN43, S4R3X7, Q5ZEY3, B4DDQ8, P28331, P48047, Q9UI09, O14561, B4DG62, C9JFR7, O60218, O75380, P47985, E9PN17, F1B5L2, B4DL14, Q96DP0, O75489, Q9H7Q4, Q16768, H0YHN9, B4DE36, P25705, P18859, P31040, P56385, P00568, P27449, P56381, Q9NQX3, A0A0S2Z…	0.427215	0.715926	0.005
GO:0019219	regulation of nucleobase-containing compound metabolic process	P	4	1211	17	6210	0.235294	0.195008	over	B4DXI2, A0A1B0GVI7, Q5JSB5, Q96AE4	B2RAH5, Q9BRZ2, Q9NQU5, B2RAH2, O00148, Q68E09, H3BV98, H3BT57, E7ETD6, Q53S54, Q8N3U4, A8K2R3, B3KRB7, H0YN81, B2R506, Q92974, E7EMW7, B4DII5, A0A024R669, B4DL02, A0A024R5U7, Q9H4L7, H0Y6H0, Q5VTR2, S4R3H4, C8C069, E9PGT3, B2RAI2, F8VZJ2, P0CJ79, P51116, P16104, O60216, B1APR7, Q96EB1, A0A0C4DFT3, P62487, B2R8X4, Q8WXA9, Q2VIN3, Q6NX55, A8K6Y1, A0A0A8K8C0, J3QR41, O15405, Q96EB6, A8K103, Q9UKV8,…	0.430207	0.719297	0.00330306
GO:0010942	positive regulation of cell death	P	1	203	17	6210	0.0588235	0.0326892	over	Q5JSB5	M0QZS0, Q5JSB5, Q53SF4, A0A0K2BMD8, Q5VV41, Q53RD8, Q96HI4, Q5JR08, H3BT57, Q9BQG0, P27348, E9PNQ9, B3KM81, P07996, Q92974, C9J185, Q53TG4, S4R3H4, C8C069, B4DGW2, E9PGT3, C9JFR7, E7ES08, P10809, Q96EB6, Q6LCB0, Q96IZ0, Q9NYF8, B4DJN0, H0Y465, E7EQL6, Q9P119, O00291, A0A0G2JNZ2, B4DQK1, B4DL06, P63104, P62258, A0A0A0MSS8, Q75MK4, P00441, P05556, F5H2U8, P31946, P31947, P51812, B7Z2X0, B3KX06, H3B…	0.432063	0.720759	0.00492611
GO:0009141	nucleoside triphosphate metabolic process	P	1	206	17	6210	0.0588235	0.0331723	over	Q9UDW1	O75947, B4DY91, Q16864, F8VYY9, K9J7I2, Q9UEH5, P30085, O43678, A4UCT0, Q9UDW1, P36871, P13073, P07195, Q9NTK5, P22695, E9PB90, Q9BSK2, Q9Y3Z3, B3KT70, R4GN43, S4R3X7, Q5ZEY3, B4DDQ8, P28331, P48047, Q9UI09, O14561, B4DG62, C9JFR7, O60218, O75380, P47985, E9PN17, F1B5L2, B4DL14, Q96DP0, H0YNJ9, O75489, Q9H7Q4, Q16768, H0YHN9, B4DE36, P25705, P18859, P31040, P56385, P00568, P27449, P56381, Q9NQX3,…	0.436872	0.726488	0.00485437
GO:0009161	ribonucleoside monophosphate metabolic process	P	1	207	17	6210	0.0588235	0.0333333	over	Q9UDW1	O75947, B4DY91, Q16864, F8VYY9, K9J7I2, Q9UEH5, P30085, O43678, A4UCT0, Q9UDW1, P36871, P13073, P07195, Q9NTK5, P22695, E9PB90, Q9BSK2, B3KT70, R4GN43, S4R3X7, Q5ZEY3, B4DDQ8, P28331, P48047, Q9UI09, O14561, J3KRW8, B4DG62, C9JFR7, O60218, O75380, P22102, P47985, A0A1B0GTJ7, E9PN17, F1B5L2, Q9BZX2, B4DL14, Q96DP0, O75489, Q9H7Q4, Q16768, H0YHN9, B4DE36, P49915, P25705, P18859, P31040, P56385, P00…	0.438466	0.726488	0.00483092
GO:0019904	protein domain specific binding	F	1	207	17	6210	0.0588235	0.0333333	over	Q5JSB5	B8ZZL5, P36507, Q9ULV8, A0A024R3R5, Q5JSB5, Q5VV41, Q9UBB5, A5YKK6, J3QRV5, A0A024R8L7, Q53S54, P27348, Q13363, P62805, Q9NRX2, Q5JVZ8, A0A0C4DFT3, P63218, Q96EB6, Q6LCB0, F8W9Y7, Q96IZ0, Q59FM7, Q9Y608, A5PKT7, Q9NY61, A8K4G7, A0A024R5H8, Q9UJU1, P63104, P62258, B4DMU7, Q59GN8, B3KR50, B2R9K8, F5H2U8, P31946, F8VVT7, B7Z836, P31947, Q5RGS4, A8K2B4, B4DMD3, O14578, A0A024RBC7, F6R503, B4DZG7, M0Q…	0.438466	0.726488	0.00483092
GO:0071705	nitrogen compound transport	P	1	210	17	6210	0.0588235	0.0338164	over	Q9BYH2	H0YDD9, Q8NCD8, Q8TD43, A0A024R798, A0A0A0MTB0, Q9Y2G3, P35658, Q8NE86, O00148, Q8TCS8, Q9H0U4, Q6PJ25, Q14571, Q9BW27, Q99808, P0DJD0, B4DUQ5, Q9BSK2, Q13243, Q14573, Q8WUM0, Q13242, P38919, Q9Y277, A0A024RDB2, A0A169TED2, Q9NRX5, B0AZR9, G5E9W3, E9PF10, A8K6H9, J3QRU4, A8K3B8, Q16762, Q8N697, Q9HAU5, Q9ULX6, O95219, M0R106, O43772, A0A024RCT1, A0A024R7L5, Q12846, Q53HS1, P51809, A0A142I7X2, Q8N…	0.443224	0.73107	0.0047619
GO:0009123	nucleoside monophosphate metabolic process	P	1	210	17	6210	0.0588235	0.0338164	over	Q9UDW1	O75947, B4DY91, Q16864, F8VYY9, K9J7I2, Q9UEH5, P30085, O43678, A4UCT0, Q9UDW1, P36871, P13073, P07195, Q9NTK5, P22695, E9PB90, Q9BSK2, B3KT70, R4GN43, S4R3X7, Q5ZEY3, B4DDQ8, P28331, P48047, Q9UI09, O14561, J3KRW8, B4DG62, C9JFR7, O60218, O75380, P22102, P47985, A0A1B0GTJ7, E9PN17, F1B5L2, Q9BZX2, B4DL14, Q96DP0, O75489, Q9H7Q4, Q16768, H0YHN9, B4DE36, P49915, P25705, P18859, P31040, P56385, P00…	0.443224	0.73107	0.0047619
GO:0022891	substrate-specific transmembrane transporter activity	F	1	211	17	6210	0.0588235	0.0339775	over	Q9BYH2	O75947, Q8NCD8, Q8TD43, H0YDD9, A0A024R798, Q16864, A0A0A0MTB0, Q9Y2G3, Q8NE86, B2RAH2, Q9H0U3, A0A0S2Z5C8, P13073, Q14571, P60059, Q99808, Q9BSK2, B4DUQ5, Q14573, P48047, Q9Y277, Q9NRX5, D6RIZ4, A8K6H9, Q9NWR8, P47985, Q8N697, E9PN17, B4DL14, Q8NEW0, M0R106, O43772, A8KA01, P25705, P18859, P56385, P27449, P56381, B4DHI5, Q9Y6R1, O15431, Q96NB2, A0A0S2Z523, Q333A6, A0A059RS35, O00299, B3KVN0, B3K…	0.444801	0.732028	0.00473934
GO:0051173	positive regulation of nitrogen compound metabolic process	P	2	545	17	6210	0.117647	0.0877617	over	A0A1B0GVI7, Q5JSB5	Q92615, P67809, B2RAH5, O00268, A5YKK6, B2RAH2, O00148, H3BT57, E7ETD6, F8VYH9, A8K2R3, B3KRB7, H0YN81, P07996, B2R506, Q92974, A0A024R669, Q9H4L7, Q5VTR2, C8C069, E9PGT3, B1APR7, P62487, B2R8X4, Q92841, Q2VIN3, J3QR41, O15405, C9J7T7, Q96EB6, Q9ULX6, A8K3S0, Q9UK58, A8K103, Q9UKV8, F5H136, A8MX75, Q9NYF8, A0A024R5X6, H6TXS1, P18615, B4DXI2, H0YJ25, B3KUJ5, Q6MZZ4, G3XAG7, O14686, B4DL06, P63104,…	0.447227	0.733908	0.00366972
GO:0019725	cellular homeostasis	P	1	213	17	6210	0.0588235	0.0342995	over	G3V1D1	H0YDD9, Q8TD43, Q16864, H3BLV0, P19174, P18085, B7Z4M5, P10599, Q8NE86, B2RAH2, A4UCT0, B2R7U4, A0A0S2Z5C8, B4DIZ2, B2R983, O00391, H3BST5, Q14571, P22694, E9PB90, Q14573, B3KT70, Q12955, B4DG62, E7ES08, P42858, Q9NWR8, P30519, B4E2J2, Q9H1E5, C9JAX1, Q96EB6, C9J1Z8, Q8NEW0, A0A024R7L5, Q12846, P35754, P27449, P00441, Q9Y6R1, Q8IWX8, Q86SX6, B3KQT9, Q9NXV2, Q02790, F5CTF4, Q9NX57, B7Z7A4, Q8WUJ3,…	0.447944	0.733908	0.00469484
GO:0043603	cellular amide metabolic process	P	2	547	17	6210	0.117647	0.0880837	over	K7ER90, B4DUP5	Q0VGA5, Q92615, O75822, B2RBJ8, Q8IXM3, H0YDD8, A5YKK6, O00148, A7BI36, H3BV98, B2R983, H3BT57, A0A087WXM6, Q9HBH1, P07996, B2RCM2, D6RBL4, Q9NQ50, Q9NRX2, Q9Y399, Q8NDV7, E9PGT3, F8VZJ2, O60218, P51116, P62241, Q9UI10, Q9Y285, C9J7T7, B4DMT5, P25398, Q9UKV8, Q9Y2Y8, J3KNB5, B2R7W0, H0YHN9, O95571, C9JRJ5, P12081, O60783, P40429, Q6IQ30, Q8N442, K7EKI4, B2R769, Q9Y2Z4, Q6FHK1, B7Z9U0, Q9BQ48, A0A…	0.449166	0.734271	0.00365631
GO:0034641	cellular nitrogen compound metabolic process	P	8	2666	17	6210	0.470588	0.429308	over	Q9UDW1, B4DXI2, K7ER90, A0A1B0GVI7, B4DUP5, Q16678, Q5JSB5, Q96AE4	A8K2Q6, Q0VGA5, O75947, O75940, B2RAH5, B2RAH2, Q9BYG3, Q68E09, E7EVH9, P13073, B2R983, H3BT57, Q68E01, B4DEA3, Q8N3U4, A8K2R3, B4DMQ7, Q92974, E7EMW7, B2R506, B4DII5, A8K330, A0A024R669, Q9BQ69, Q9H4L4, A0A024R5U7, D6RBL4, Q9H4L7, O75934, Q9UKU7, O14561, H0Y6H0, P52209, B4DVD6, S4R3H4, C8C069, Q8NDV7, B3KY11, P0CJ79, B2RAI2, P19623, P16104, B2R514, P62487, Q96EB1, B2R8X4, Q8WXA9, A8K6Y1, Q9Y285,…	0.456143	0.74402	0.00300075
GO:0050789	regulation of biological process	P	11	3745	17	6210	0.647059	0.60306	over	B4DXI2, K7ER90, B4DUP5, A0A1B0GVI7, Q16678, Q5JSB5, B4DWS8, Q96AE4, B7ZL14, G3V1D1, Q05BX6	E9PJ81, H0Y6I0, A0A0K2BMD8, B2RAH5, Q8NE86, B2RAH2, F5GZI3, B2R983, H3BT57, H3BST5, B4DEA3, Q8N3U4, B4DMQ7, O14545, E7EMW7, Q9H4L5, B4DN44, A0A024R669, Q9H4L4, Q9H4L7, A0A024R5U7, Q9UKU7, K7EKE8, H0Y6H0, B4DVD6, E9PIX7, S4R3H4, H7C5H6, Q8NDV7, Q8IWJ2, B3KY11, P0CJ79, B2RAI2, P62487, B2R8X4, P42858, Q8WXA9, A8K6Y1, P61158, Q05BX6, Q9UKV5, B4DMT5, P07602, Q9UKV8, B4DMT1, A0A024R5X6, A0A087WZT0, Q5T…	0.458086	0.745061	0.00293725
GO:0046128	purine ribonucleoside metabolic process	P	1	220	17	6210	0.0588235	0.0354267	over	Q9UDW1	O75947, B4DY91, Q16864, F8VYY9, K9J7I2, Q9UEH5, O43678, A4UCT0, Q9UDW1, P36871, P13073, P07195, Q9NTK5, P22695, E9PB90, Q9BSK2, B3KT70, R4GN43, S4R3X7, Q5ZEY3, B4DDQ8, P28331, P48047, Q9UI09, O14561, O00154, B4DG62, C9JFR7, O60218, O75380, P47985, A0A1B0GTJ7, E9PN17, F1B5L2, B4DL14, Q96DP0, O75489, Q9H7Q4, Q16768, H0YHN9, B4DE36, P49915, P25705, P23526, P18859, P31040, P56385, P00568, P27449, P56…	0.458811	0.745061	0.00454545
GO:0097190	apoptotic signaling pathway	P	1	222	17	6210	0.0588235	0.0357488	over	Q5JSB5	Q5JSB5, Q86TM6, Q53SF4, Q96HI4, Q8WWQ0, B2R7U4, A0A024RCR6, H3BT57, H3BST5, Q53S54, Q9BQG0, P27348, A8K2R3, E9PNQ9, P07996, Q92974, C9J185, Q2QL34, Q53TG4, A0A169TED2, C9JFR7, Q9Y4L1, P42858, P14174, Q92841, Q6NX55, C9JAX1, Q96EB6, Q6LCB0, Q9NYF8, O75489, E9PEQ6, Q12846, A8KAQ3, H6TXS1, O00291, P61289, P63104, P62258, Q5T2B5, P00441, P31946, P31947, F8WAX7, A0A0C4DGX4, F5CTF4, B3KX06, A5YRV2, Q9U…	0.461879	0.746738	0.0045045
GO:0042278	purine nucleoside metabolic process	P	1	222	17	6210	0.0588235	0.0357488	over	Q9UDW1	O75947, B4DY91, Q16864, F8VYY9, K9J7I2, Q9UEH5, O43678, A4UCT0, Q9UDW1, P36871, P13073, P07195, Q9NTK5, P22695, E9PB90, Q9BSK2, Q9BQ69, B3KT70, R4GN43, S4R3X7, Q5ZEY3, B4DDQ8, P28331, P48047, Q9UI09, O14561, O00154, B4DG62, C9JFR7, O60218, O75380, P47985, A0A1B0GTJ7, E9PN17, F1B5L2, B4DL14, Q96DP0, O75489, Q9H7Q4, Q16768, H0YHN9, B4DE36, P49915, P25705, P23526, P18859, P31040, P56385, P00568, P27…	0.461879	0.746738	0.0045045
GO:0001775	cell activation	P	1	223	17	6210	0.0588235	0.0359098	over	A0A1B0GVI7	H3BLV0, O14672, Q53RD8, Q6QNY0, I3L412, Q562L9, Q5JR08, Q14571, B4DPW9, Q14573, P07996, Q14451, P27487, Q16512, Q16513, K7EKE8, P12429, A0A169TED2, Q53TG4, E9PGT3, B0AZR9, E7ES08, Q96F46, A8K3B6, J3QRU4, P14174, P09382, A0A0C4DGV9, O15405, P10809, A8K103, Q9Y2Y8, O95219, O75369, Q12846, Q06124, Q9BR76, B3KR49, Q3KRG8, P51809, Q99584, K7ES89, B4DTQ6, P63104, P05556, B3KR50, P51812, Q13707, P68133,…	0.463407	0.747562	0.0044843
GO:0022857	transmembrane transporter activity	F	1	224	17	6210	0.0588235	0.0360709	over	Q9BYH2	O75947, Q8NCD8, Q8TD43, H0YDD9, A0A024R798, Q16864, A0A0A0MTB0, Q9Y2G3, Q8NE86, B2RAH2, Q59E87, Q9H0U3, A0A0S2Z5C8, P13073, Q14571, P60059, Q99808, Q9BSK2, B4DUQ5, Q14573, P48047, Q9Y277, Q9NRX5, D6RIZ4, A8K6H9, Q9NWR8, P47985, Q8N697, E9PN17, B4DL14, Q8NEW0, M0R106, O43772, A0A024RCT1, A8KA01, P25705, P18859, P56385, P27449, P56381, B4DHI5, Q9Y6R1, O15431, Q96NB2, Q9UP03, A0A0S2Z523, Q333A6, Q2L…	0.46493	0.747677	0.00446429
GO:0061024	membrane organization	P	2	564	17	6210	0.117647	0.0908213	over	Q5JSB5, Q05BX6	D6RF48, F5H157, B3KM89, H0Y6I0, Q5VV41, Q96HI4, Q5JR08, A0A024RCR6, B3KUH0, F5GZI3, Q6PJ25, A0A087WXM6, H3BST5, Q9UK41, Q53S54, O14662, Q0JRZ9, P61026, P27348, B3KRB7, P59190, P07996, O95202, P49257, Q12955, B9A067, K7EKE8, Q5JVZ8, F8WB76, Q8IWJ2, E9PF10, B3KWN0, J3QRU4, A0A0C4DFT3, P62241, A0A087WXN9, O15400, Q05BX6, J3QR41, Q9ULX6, P50395, P25398, B4DN54, E9PEQ6, Q12846, A0A087WYR0, Q5T0N5, Q5T…	0.465516	0.747677	0.0035461
GO:0030001	metal ion transport	P	1	226	17	6210	0.0588235	0.0363929	over	G3V1D1	Q658P3, Q8TD43, Q16864, K9J7I2, P19174, Q9UEH5, B2RAH5, Q8NE86, B2RAH2, A0A0S2Z5C8, Q9H0U3, B2R983, Q14571, P22694, P27348, Q14573, R4GN43, Q12955, P28331, Q9UI09, P58546, F8WB76, B3KWN0, A0A0C4DFT3, P42858, Q9NWR8, B4E2J2, E5RFJ9, Q8IWZ3, Q8N335, P22466, F1B5L2, H0YLF3, Q96DP0, Q9ULH0, Q8NEW0, O75489, A0A024R5X6, K7EIU4, A8KA01, B7ZKY2, P35754, P27449, B4DL06, P63104, P62258, Q9Y6R1, P31946, Q8I…	0.467965	0.749971	0.00442478
GO:0009150	purine ribonucleotide metabolic process	P	1	228	17	6210	0.0588235	0.036715	over	Q9UDW1	O75947, B4DY91, Q16864, F8VYY9, K9J7I2, Q9UEH5, P30085, O43678, B4DIZ6, A4UCT0, Q9UDW1, P36871, P13073, P07195, Q9NTK5, P22695, E9PB90, Q9BSK2, P07996, B3KT70, R4GN43, S4R3X7, Q5ZEY3, B4DDQ8, P28331, P48047, Q9UI09, O14561, O00154, B4DG62, C9JFR7, B0AZR9, O60218, O75380, P22102, P47985, A0A1B0GTJ7, E9PN17, F1B5L2, B4DL14, Q96DP0, O75489, Q9H7Q4, Q16768, H0YHN9, B4DE36, P49915, P25705, P18859, P31…	0.470984	0.750748	0.00438596
GO:0006091	generation of precursor metabolites and energy	P	1	228	17	6210	0.0588235	0.036715	over	Q9UDW1	Q59GM9, B4DY91, Q16864, F8VYY9, K9J7I2, Q9UEH5, O43678, Q96CP5, A4UCT0, Q9UDW1, P36871, P13073, A0A024R8L7, P07195, P22695, E9PB90, Q9BSK2, E7EVY0, B3KT70, R4GN43, S4R3X7, Q5ZEY3, B4DDQ8, P28331, Q6IB91, Q9UI09, O14561, P11216, B4DG62, C9JFR7, Q96HY7, O60218, P38117, O75380, F8W031, P47985, A8K3S1, F1B5L2, Q96DP0, A8K4W7, O75489, Q9H7Q4, Q16768, H0YHN9, B4DE36, A8K6K7, Q96I99, B2R7W7, P31040, P27…	0.470984	0.750748	0.00438596
GO:0005737	cytoplasm	C	13	4490	17	6210	0.764706	0.723027	over	Q16678, Q5JSB5, Q4G148, G3V1D1, Q9UDW1, K7ER90, B4DXI2, B4DUP5, A0A1B0GVI7, B4DWS8, Q96AE4, B7ZL14, Q05BX6	E9PJ81, H0Y6I0, B2RAH7, A0A0K2BMD8, B2RAH5, Q8NE86, B2RAH2, H7C5G2, E7EVH9, F5GZI3, B2R983, H3BT57, B2R8W4, H3BST5, B3KXN9, B4DEA3, Q8N3U4, B4DMQ7, E7EMW7, Q9H4L5, B4DN44, A0A024R669, Q9UKU7, Q6IB91, O14561, P52209, B4DVD6, E9PIX7, S4R3H4, Q8NDV7, H7C5H6, P54868, Q8IWJ2, B2RAI2, B3KY11, P19623, D3DPC4, B2R8X4, P42858, A8K6Y1, P61158, Q05BX6, Q9UKV5, P07602, B4DMT5, J3KRJ3, Q9UKV8, B4DMT1, A0A024R…	0.471519	0.750748	0.00289532	RefSeqs: B5BU16, B2RD36, A8MYV4, E7EV99, Q14789, A0JP11, Q7RTP6, P19474, A0A0C4DG40, F6SDV2, A0A0C4DG44, O60344, Q6FG43, Q9HC35, Q9BZS5, Q5H9P4, E5RFK7, B7Z4P1, Q8WUF5, Q9P0U0, Q7RU05, Q96G03, H7BZ18, F8WDR2, Q9HBQ7, B2RD51, Q7L9L4, Q6ZQN2, E9PIF4, Q9UHV9, B4DGL8, P21796, A8K2Q6, O75947, Q0VGA5, Q9Y266, O75940, A0MZ66, Q9BYG3, Q68E09, Q9HAF1, P13073, O00391, Q5U5X0, Q9BYG5, Q92973, A8K2R3, K7EP07…
GO:0048878	chemical homeostasis	P	1	230	17	6210	0.0588235	0.037037	over	G3V1D1	Q59GM9, H0YDD9, Q8TD43, Q16864, H3BLV0, P19174, P18085, B7Z4M5, Q8NE86, B2RAH2, B2R7U4, A0A0S2Z5C8, B2R983, B4E1G1, A0A024R8L7, H0YFI1, Q14571, P22694, E9PB90, Q6PIA0, Q14573, B3KT70, Q12955, A0A087WU84, P11216, B4DG62, B0AZR9, E7ES08, P42858, Q9NWR8, P30519, B4E2J2, C9JAX1, Q96EB6, Q13131, Q8N335, C9J1Z8, H0YLF3, Q8NEW0, Q12846, Q16531, P27449, P22676, Q9Y6R1, O15551, Q8IWX8, Q9UP03, O43306, Q9N…	0.473987	0.753044	0.00434783
GO:0009119	ribonucleoside metabolic process	P	1	233	17	6210	0.0588235	0.0375201	over	Q9UDW1	O75947, B4DY91, Q16864, F8VYY9, K9J7I2, Q9UEH5, P30085, O43678, A4UCT0, Q9UDW1, P36871, P13073, P07195, Q9NTK5, P22695, E9PB90, Q9BSK2, B3KT70, R4GN43, S4R3X7, Q5ZEY3, B4DDQ8, P28331, P48047, Q9UI09, O14561, O00154, B4DG62, C9JFR7, O60218, O75380, P47985, A0A1B0GTJ7, E9PN17, F1B5L2, Q9BZX2, B4DL14, Q96DP0, O75489, Q9H7Q4, Q16768, H0YHN9, B4DE36, P49915, P25705, P23526, P18859, P31040, P56385, P00…	0.478461	0.758511	0.00429185
GO:0009259	ribonucleotide metabolic process	P	1	235	17	6210	0.0588235	0.0378422	over	Q9UDW1	O75947, B4DY91, Q16864, F8VYY9, K9J7I2, Q9UEH5, P30085, O43678, B4DIZ6, Q9UDW1, A4UCT0, P13073, P36871, P07195, Q9NTK5, P22695, E9PB90, Q9BSK2, P07996, B3KT70, R4GN43, S4R3X7, Q5ZEY3, P28331, B4DDQ8, P48047, Q9UI09, O14561, O00154, J3KRW8, C9JFR7, B4DG62, B0AZR9, O60218, O75380, P22102, P47985, A0A1B0GTJ7, E9PN17, F1B5L2, Q9BZX2, B4DL14, Q96DP0, O75489, Q9H7Q4, Q16768, H0YHN9, B4DE36, P49915, P25…	0.481424	0.761563	0.00425532
GO:0042803	protein homodimerization activity	F	1	236	17	6210	0.0588235	0.0380032	over	Q05BX6	B8ZZL5, C9JBI3, B2ZGL7, F2Z2V0, M0R205, Q53SF4, B2R7D7, B4DIZ6, B2R7U4, H3BV98, H3BT57, E7EVY0, B3KRB7, E9PNQ9, B4DMQ7, Q9HAV7, B2R506, P27487, C9J185, Q9HB71, D3DXC9, K7EKE8, O00154, B7Z4N7, P19623, P51116, A0A024R0K5, Q9Y2H2, B4E2J2, Q15554, O15405, Q05BX6, Q8N335, Q9H2G2, Q13257, A0A024RBR1, Q9H147, B4E0X0, Q3KRG8, B2R6U8, A8K4G7, P12081, Q99584, P09234, O94804, Q9BRG1, B4DQK1, B4DVU8, Q9Y2Z4,…	0.482899	0.762254	0.00423729
GO:0090150	establishment of protein localization to membrane	P	1	238	17	6210	0.0588235	0.0383253	over	Q5JSB5	C9K025, F5H157, H0Y6I0, Q5JSB5, P62917, E9PQW0, Q5VV41, P11441, B2R7D7, Q96HI4, A0A024RCR6, Q9H0U4, A0A087WXM6, P46783, P61026, P0DJD0, I3L3P7, H3BN98, E7EVY0, P27348, B3KRB7, B4DYY3, P59190, B4DWW0, Q12955, O75379, P46781, Q8IWJ2, A8K3B6, K7EJT5, B4DRL9, A0A0C4DFT3, P62241, P60866, P46779, B4DV31, P46778, P50395, P25398, Q13136, B3KS61, B4DN54, Q12846, A0A087WYR0, Q5T6Z8, P40429, Q9UJU1, P63104,…	0.485838	0.765248	0.00420168
GO:0032991	macromolecular complex	C	8	2725	17	6210	0.470588	0.438808	over	Q9UDW1, K7ER90, B4DXI2, A0A1B0GVI7, B4DUP5, Q5JSB5, Q96AE4, G3V1D1	E9PJ81, A8K2Q6, O75947, O75940, A0A0K2BMD8, B2RAH5, Q8NE86, B2RAH2, H7C5G2, Q9HAF1, F5GZI3, P13073, H3BT57, Q68E01, B4DEA3, H0Y6I7, Q8N3U4, A8K2R3, K7EP07, B4DMQ7, B2R506, Q92974, A0A024R669, Q9H4L4, D6RBL4, Q9H4L7, O75934, Q12834, Q59EH0, O14561, B4DVD6, S4R3H4, Q8NDV7, H7C5H6, Q6QN92, C8C069, E9PF10, B3KY11, P16104, B2R514, P62487, Q96EB1, B2R8X4, P42858, Q9H0C8, A8K6Y1, P61158, Q9Y285, O15400,…	0.488122	0.767199	0.00293578
GO:1901137	carbohydrate derivative biosynthetic process	P	1	242	17	6210	0.0588235	0.0389694	over	Q4G148	O75947, P18085, P30085, Q86TM6, Q9NYU1, Q9NYU2, E9PPU6, A4UCT0, E7EVH9, Q9H0U3, P36871, E9PB90, A0A140VKC0, P07996, B3KT70, P49257, J3KSI4, B4DDQ8, P48047, O00154, J3KRW8, B4DG62, B0AZR9, A0A087X208, E7EM50, P22102, A0A1B0GTJ7, B4DW50, Q96EB6, B2R758, E9PN17, Q9BZX2, C9J1Z8, B4DL14, D6RF69, B2R6D4, A0A0A0MTD6, H0YNJ9, O75487, P15104, Q5T6Z8, O60547, B3KNL8, P49915, P25705, P18859, P56385, P00568,…	0.491669	0.771122	0.00413223
GO:0034654	nucleobase-containing compound biosynthetic process	P	4	1306	17	6210	0.235294	0.210306	over	B4DXI2, A0A1B0GVI7, Q5JSB5, Q96AE4	O75947, B2RAH5, Q9BRZ2, Q9NQU5, B2RAH2, O00148, Q68E09, E7EVH9, H3BV98, H3BT57, E7ETD6, A0A087WXM6, B3KRB0, Q68E01, A8K2R3, B3KRB7, H0YN81, A0A140VKC0, B2R506, Q92974, A0A024R669, Q9H4L7, H0Y6H0, O00154, Q5VTR2, B4DVD6, Q05048, C8C069, E9PGT3, B2RAI2, F8VZJ2, P0CJ79, O60216, Q96EB1, A0A0C4DFT3, P62487, B2R8X4, A0A087WXN4, P62241, Q2VIN3, Q6NX55, A8K6Y1, A0A0A8K8C0, J3QR41, O15405, Q96EB6, B4DL14,…	0.494048	0.773201	0.00306279
GO:0080090	regulation of primary metabolic process	P	6	2030	17	6210	0.352941	0.326892	over	K7ER90, B4DXI2, A0A1B0GVI7, B4DUP5, Q5JSB5, Q96AE4	E9PJ81, A8K2Q6, B2RAH5, B2RAH2, Q68E09, F5GZI3, H3BT57, B4DEA3, Q8N3U4, A8K2R3, Q92974, E7EMW7, B2R506, B4DII5, A8K330, A0A024R669, Q9BQ69, Q9H4L4, A0A024R5U7, D6RBL4, Q9H4L7, Q9UKU7, Q12834, H0Y6H0, S4R3H4, E9PIX7, C8C069, Q8NDV7, F8WB76, P0CJ79, B2RAI2, B3KY11, P16104, Q96EB1, P62487, B2R8X4, P42858, Q8WXA9, Q9H0C8, A8K6Y1, A0A0A8K8C0, O15405, A8K321, Q96EB6, P10809, B4DMT5, P07602, A8K2S7, Q9U…	0.499546	0.776554	0.00295567
GO:1903827	regulation of cellular protein localization	P	1	248	17	6210	0.0588235	0.0399356	over	Q5JSB5	H0YNH5, B3KS40, Q5JSB5, P10599, Q5VV41, B2R7D7, B2RAH2, Q96HI4, P48729, Q5JR08, H3BT57, P0DJD0, A0A075B784, P27348, B4DPW9, A8K2R3, A8K330, E7EMW7, A0A0C4DGE4, Q16512, Q9UNK0, H0YNG9, Q8IWJ2, A8K3B6, A0A140TA28, J3QRU4, A0A0C4DFT3, O15400, P46779, Q96EB6, Q8N335, A8K2S7, P50395, Q13136, A0A024R4V8, F5H136, Q9BVP2, O75369, O75367, Q12846, Q5T6Z8, Q9P119, A8K4G7, B3KUJ5, Q9UJU1, P63104, B4DL06, P62…	0.500299	0.776554	0.00403226
GO:0006163	purine nucleotide metabolic process	P	1	249	17	6210	0.0588235	0.0400966	over	Q9UDW1	O75947, B4DY91, Q16864, F8VYY9, K9J7I2, Q9UEH5, P30085, O43678, B4DIZ6, Q9UDW1, A4UCT0, P13073, P36871, P07195, Q9NTK5, P22695, E9PB90, Q9BSK2, Q9Y3Z3, P07996, B3KT70, R4GN43, S4R3X7, Q5ZEY3, P28331, B4DDQ8, P48047, Q9UI09, O14561, O00154, C9JFR7, B4DG62, B0AZR9, O60218, O75380, P22102, P47985, A0A1B0GTJ7, E9PN17, F1B5L2, B4DL14, Q96DP0, O75489, Q9H7Q4, Q16768, H0YHN9, A8K6K2, B4DE36, P49915, P25…	0.501724	0.776554	0.00401606
GO:0032787	monocarboxylic acid metabolic process	P	1	249	17	6210	0.0588235	0.0400966	over	Q16678	B4DY91, Q9H845, A8MXV4, F8VYY9, B2RBJ8, Q04760, A4UCT0, P36871, A0A024R8L7, P07195, B4DJK7, P43155, E9PB90, P49137, B4DMQ7, P24752, O75828, B3KT70, Q9UKU7, S4R3X7, Q5ZEY3, B4DDQ8, O14561, O00154, P52209, Q4G1C4, Q8N8N7, Q6QN92, Q96HY7, B4DG62, K7ERC8, P38117, O60218, P14174, P30084, F8W031, B3KRC6, Q6Y1H2, Q96EB6, Q5T1C6, Q9Y2Y8, Q9H7Q4, Q16768, B2R7W0, H0YHN9, Q08426, B4DE36, Q53GQ0, H6TXS1, P09…	0.501724	0.776554	0.00401606
GO:0006915	apoptotic process	P	2	603	17	6210	0.117647	0.0971014	over	A0A1B0GVI7, Q5JSB5	I3L4A2, A8K2Q6, M0QZS0, O75940, Q5VV41, Q9NQU5, A0A0C4DFU1, Q96HI4, Q5JR08, B2R7U4, A0A024RCR6, H3BT57, F8VYH9, O00273, H3BST5, Q53S54, P27348, A8K2R3, B3KRB7, B3KM81, B4DMQ7, P07996, Q92974, O14681, P28331, Q9Y277, S4R3H4, C8C069, E9PGT3, C9JFR7, A0A024R0K5, P42858, P14174, B3KUI2, Q92841, Q6NX55, J3QR41, O15405, Q96EB6, P10809, Q9H2G2, A8K103, A8MX75, Q9NYF8, B4DJN0, E9PEQ6, B4E0X0, G5E9Z2, Q12…	0.502082	0.776554	0.00331675
GO:0048523	negative regulation of cellular process	P	5	1677	17	6210	0.294118	0.270048	over	B4DXI2, A0A1B0GVI7, Q16678, Q5JSB5, G3V1D1	E9PJ81, A8K2Q6, Q9BYG3, F5GZI3, B2R983, H3BT57, O00391, Q68E01, B4DEA3, Q8N3U4, A8K2R3, E7EMW7, Q92974, Q9BQ69, D6RBL4, Q9H4L7, Q12834, H0Y6H0, S4R3H4, C8C069, Q8NDV7, B2RAI2, B3KY11, P16104, B2R8X4, P42858, Q9H0C8, A8K6Y1, A0A0A8K8C0, O15405, Q96EB6, P10809, A8K2S7, Q9UKV8, E9PEQ6, Q06124, Q5T6Z8, B7ZKY2, Q3KRG8, Q6MZZ4, A8K2T5, P26358, Q59EJ8, B4DMU7, A8MW49, F5H2U8, C9JCN8, A0A024R201, A0A024R…	0.502538	0.776554	0.00298151
GO:0006511	ubiquitin-dependent protein catabolic process	P	1	251	17	6210	0.0588235	0.0404187	over	Q53EY9	E9PJ81, G5E9G6, Q9ULV8, Q5VYK3, B3KS40, Q86TM6, I3L412, P48729, A0A0A0MSQ3, O60566, B4DIZ2, P15374, B4E1G1, H3BT57, Q9UK41, Q53S54, B4DEA3, A0A075B784, Q14694, E7EMW7, A8K4T6, A0A0D9SG71, E5RJR5, Q12834, B7Z4N7, Q5VTR2, J3QR41, P61956, Q9UKV5, Q96EB6, A8K103, Q13257, A0A024R4V8, Q9P0P0, P35998, B4DUC2, A0AVT1, Q9P119, A8K4G7, Q16531, P40306, G3XAG7, P61289, B4DL06, R4GND1, Q93009, Q93008, Q5T2B5,…	0.504562	0.776905	0.00398406
GO:0010638	positive regulation of organelle organization	P	1	252	17	6210	0.0588235	0.0405797	over	Q5JSB5	H0YNH5, D6RF48, B3KS40, Q5JSB5, P18085, A5YKK6, Q68E09, K7ELY9, Q96HI4, Q8WWQ0, Q5JR08, H3BT57, O15511, Q53S54, A0A075B784, P27348, B4DPW9, A8K330, P49257, Q16513, Q53TG4, A0A169TED2, P59998, H0YAN8, A0A140TA28, P42858, A0A0C4DGV9, P60983, P61158, P60981, Q15554, J3QR41, P46779, Q9Y281, C9J1Z8, F5H136, Q9BVP2, A0A024RBR1, O75367, Q9BR76, A9QQ22, B3KR49, A8K4G7, P61160, Q9NX47, Q9UJU1, P63104, P62…	0.505976	0.776905	0.00396825
GO:0019693	ribose phosphate metabolic process	P	1	254	17	6210	0.0588235	0.0409018	over	Q9UDW1	O75947, B4DY91, P37837, Q16864, F8VYY9, K9J7I2, Q9UEH5, P30085, O43678, B4DIZ6, Q9UDW1, A4UCT0, P13073, P36871, P07195, Q9NTK5, P22695, E9PB90, Q9BSK2, P07996, B3KT70, R4GN43, S4R3X7, Q5ZEY3, P28331, B4DDQ8, P48047, Q9UI09, O14561, O00154, P52209, J3KRW8, C9JFR7, B4DG62, B0AZR9, O60218, O75380, P22102, P47985, A0A1B0GTJ7, P49247, E9PN17, F1B5L2, Q9BZX2, O95336, B4DL14, Q96DP0, O75489, Q9H7Q4, Q16…	0.508791	0.776905	0.00393701
GO:0009116	nucleoside metabolic process	P	1	255	17	6210	0.0588235	0.0410628	over	Q9UDW1	O75947, B4DY91, Q16864, F8VYY9, K9J7I2, Q9UEH5, P30085, O43678, Q9UDW1, A4UCT0, E7EVH9, P13073, P36871, P07195, Q9NTK5, P22695, E9PB90, Q9BSK2, Q9BQ69, B3KT70, R4GN43, S4R3X7, Q5ZEY3, P28331, B4DDQ8, P48047, Q9UI09, O14561, O00154, J3KRW8, C9JFR7, B4DG62, O60218, O75380, P47985, A0A1B0GTJ7, E9PN17, F1B5L2, Q9BZX2, B4DL14, Q96DP0, O75489, H0YNJ9, Q9H7Q4, Q16768, H0YHN9, B4DE36, P49915, P23526, P25…	0.510193	0.776905	0.00392157
GO:0019941	modification-dependent protein catabolic process	P	1	255	17	6210	0.0588235	0.0410628	over	Q53EY9	E9PJ81, G5E9G6, Q9ULV8, Q5VYK3, B3KS40, Q86TM6, I3L412, A0A0A0MSQ3, P48729, O60566, B4DIZ2, P15374, B4E1G1, H3BT57, Q9UK41, Q53S54, B4DEA3, A0A075B784, Q14694, E7EMW7, A8K4T6, A0A0D9SG71, E5RJR5, Q12834, B7Z4N7, Q5VTR2, J3QR41, P61956, Q9UKV5, Q96EB6, A8K103, Q13257, A0A024R4V8, Q9P0P0, P35998, B4DUC2, A0AVT1, Q9P119, A8K4G7, Q16531, P40306, G3XAG7, P61289, B4DL06, R4GND1, Q93009, P22314, Q93008,…	0.510193	0.776905	0.00392157
GO:0065008	regulation of biological quality	P	4	1332	17	6210	0.235294	0.214493	over	A0A1B0GVI7, Q16678, Q5JSB5, G3V1D1	Q59GM9, A8K2Q6, H0Y6I0, M0QZS0, B7Z4M5, B2RAH5, Q8NE86, A0A0C4DFU1, B2RAH2, Q5JR08, B2R983, H3BT57, O00391, H3BST5, Q92973, A8K2R3, A8K4T6, Q9UKU7, P49257, P28331, Q12834, Q5T123, S4R3H4, F8WB76, C8C069, O60218, P51116, A0A0C4DFT3, B2R8X4, P42858, P61158, O15400, J3QR41, P67936, Q96EB6, Q9Y281, P10809, P27694, A8K103, Q86SY9, F5H136, A0A024R5X6, E9PEQ6, Q06124, Q12846, B7ZKY2, C9JRJ5, P61160, B2R…	0.511205	0.776905	0.003003
GO:0030529	intracellular ribonucleoprotein complex	C	2	613	17	6210	0.117647	0.0987118	over	K7ER90, B4DUP5	A8K566, Q92615, B4E299, O75822, P67809, A0A0K2BMD8, Q8IXM3, H0YDD8, A5YKK6, O00148, Q562L9, A7BI36, H3BV98, A0A087WXM6, Q9BVA1, Q9Y2X3, Q6NZY4, Q9UK45, Q9H2H8, O75934, Q9NQ50, Q9NRX2, Q9Y399, B4DVD6, Q8ND56, Q8NDV7, Q6P2E9, B3KY11, J3QLI9, P51116, H0UI99, P62241, A2A2V2, Q2VIN3, Q9UI10, Q92841, A6NHL2, B4DMT5, P25398, Q9UKV8, B4DLR3, E9PEQ6, A0A087WYR0, H6TXS1, B3KUJ0, C9JRJ5, O60783, P40429, Q9Y…	0.511233	0.776905	0.00326264
GO:1990904	ribonucleoprotein complex	C	2	613	17	6210	0.117647	0.0987118	over	K7ER90, B4DUP5	A8K566, Q92615, B4E299, O75822, P67809, A0A0K2BMD8, Q8IXM3, H0YDD8, A5YKK6, O00148, Q562L9, A7BI36, H3BV98, A0A087WXM6, Q9BVA1, Q9Y2X3, Q6NZY4, Q9UK45, Q9H2H8, O75934, Q9NQ50, Q9NRX2, Q9Y399, B4DVD6, Q8ND56, Q8NDV7, Q6P2E9, B3KY11, J3QLI9, P51116, H0UI99, A2A2V2, P62241, Q2VIN3, Q92841, Q9UI10, A6NHL2, B4DMT5, P25398, Q9UKV8, B4DLR3, E9PEQ6, A0A087WYR0, H6TXS1, B3KUJ0, C9JRJ5, O60783, P40429, Q9Y…	0.511233	0.776905	0.00326264
GO:0019438	aromatic compound biosynthetic process	P	4	1336	17	6210	0.235294	0.215137	over	B4DXI2, A0A1B0GVI7, Q5JSB5, Q96AE4	O75947, B2RAH5, Q9BRZ2, Q9NQU5, B2RAH2, O00148, Q68E09, E7EVH9, H3BV98, H3BT57, E7ETD6, A0A087WXM6, B3KRB0, Q68E01, A8K2R3, B3KRB7, H0YN81, A0A140VKC0, B2R506, Q92974, A0A024R669, Q9H4L7, H0Y6H0, O00154, Q5VTR2, B4DVD6, Q05048, C8C069, E9PGT3, B2RAI2, F8VZJ2, P0CJ79, O60216, Q96EB1, A0A0C4DFT3, P62487, B2R8X4, A0A087WXN4, P62241, Q2VIN3, Q6NX55, A8K6Y1, Q9Y285, A0A0A8K8C0, J3QR41, O15405, Q96EB6,…	0.513829	0.778459	0.00299401
GO:0005743	mitochondrial inner membrane	C	1	258	17	6210	0.0588235	0.0415459	over	Q9UDW1	O75947, Q9H845, K9J7I2, Q9UEH5, O43678, Q8IXM3, Q8NE86, P12532, Q96CP5, Q9NX20, Q02338, Q9UDW1, P13073, C9JBY7, P22695, B4DUQ5, Q96DA6, Q53T76, R4GN43, O95202, P48047, P28331, A0A024R301, Q9UI09, B9A067, Q9NQ50, Q9NRX2, O14561, C9JFR7, O75380, Q9NWR8, Q9UDX5, Q9BUN6, P47985, B3KM95, E9PN17, F1B5L2, B4DL14, J3KRJ3, Q96DP0, O75489, O43772, B2R9J4, Q9H2W6, E7EQL6, P25705, P18859, P31040, O60783, P56…	0.514377	0.778459	0.00387597
GO:0018130	heterocycle biosynthetic process	P	4	1340	17	6210	0.235294	0.215781	over	B4DXI2, A0A1B0GVI7, Q5JSB5, Q96AE4	O75947, B2RAH5, Q9BRZ2, Q9NQU5, B2RAH2, O00148, Q68E09, E7EVH9, H3BV98, H3BT57, E7ETD6, A0A087WXM6, B3KRB0, Q68E01, A8K2R3, B3KRB7, H0YN81, A0A140VKC0, B2R506, Q92974, A0A024R669, Q9H4L7, H0Y6H0, O00154, Q5VTR2, B4DVD6, Q05048, C8C069, E9PGT3, B2RAI2, F8VZJ2, P0CJ79, O60216, Q96EB1, A0A0C4DFT3, P62487, B2R8X4, A0A087WXN4, P62241, Q2VIN3, Q6NX55, A8K6Y1, Q9Y285, A0A0A8K8C0, J3QR41, O15405, Q96EB6,…	0.516449	0.779987	0.00298507
GO:0012501	programmed cell death	P	2	621	17	6210	0.117647	0.1	over	A0A1B0GVI7, Q5JSB5	I3L4A2, A8K2Q6, M0QZS0, O75940, Q5VV41, Q9NQU5, A0A0C4DFU1, Q96HI4, Q5JR08, B2R7U4, Q8NB16, A0A024RCR6, H3BT57, O00273, F8VYH9, H3BST5, Q53S54, P27348, A8K2R3, B3KRB7, B3KM81, B4DMQ7, P07996, Q92974, O14681, P28331, Q9Y277, S4R3H4, C8C069, E9PGT3, C9JFR7, A0A024R0K5, P42858, P14174, B3KUI2, Q92841, Q6NX55, J3QR41, O15405, P10809, Q96EB6, Q9H2G2, A8K103, A8MX75, Q9NYF8, B4DJN0, E9PEQ6, B4E0X0, G5E…	0.518486	0.781455	0.00322061
GO:0043632	modification-dependent macromolecule catabolic process	P	1	262	17	6210	0.0588235	0.04219	over	Q53EY9	E9PJ81, G5E9G6, Q9ULV8, Q5VYK3, B3KS40, Q86TM6, Q8TCS8, P48729, I3L412, A0A0A0MSQ3, O60566, B4DIZ2, P15374, B4E1G1, H3BT57, Q9UK41, Q53S54, B4DEA3, A0A075B784, Q14694, E7EMW7, A8K4T6, A0A0D9SG71, E5RJR5, Q12834, B7Z4N7, Q5VTR2, J3QR41, P61956, Q9UKV5, Q96EB6, A8K103, Q13257, A0A024R4V8, Q9P0P0, P35998, B4DUC2, A0AVT1, Q9P119, A8K4G7, Q16531, P40306, G3XAG7, P61289, B4DL06, P22314, R4GND1, Q93009,…	0.519903	0.781985	0.00381679
GO:0016021	integral component of membrane	C	2	624	17	6210	0.117647	0.100483	over	Q9UDW1, Q9BYH2	Q9UHN6, A0A024R3R5, A0A024R798, O14672, P52799, Q8NE86, B2RAH2, A7BI36, Q6PJ25, O00391, H3BST5, O14662, B2R6S9, P07996, B4DL02, A8K556, Q92968, P49257, B9A067, K7EKE8, D6RIZ4, C8C069, P37268, Q9NR77, A0A024R0K5, E7EM50, Q6ZWP8, J3QRU4, A0A0C4DFT3, F8W031, Q8N4V1, O15400, Q9UKV5, P10809, P07602, D6RF69, O95219, Q8NEW0, B4DJN0, B4DN54, A0A024RCT1, G5E9Z2, Q06124, Q12846, A8KAQ3, A0A0B4J206, Q3KRG8,…	0.521189	0.782317	0.00320513
GO:1901657	glycosyl compound metabolic process	P	1	267	17	6210	0.0588235	0.0429952	over	Q9UDW1	O75947, B4DY91, Q16864, F8VYY9, K9J7I2, Q9UEH5, P30085, O43678, Q9UDW1, A4UCT0, E7EVH9, P36871, P13073, P07195, Q9NTK5, P22695, E9PB90, Q9BSK2, Q9BQ69, B3KT70, R4GN43, S4R3X7, Q5ZEY3, B4DDQ8, P28331, P48047, Q9UI09, O14561, O00154, J3KRW8, B4DG62, C9JFR7, O60218, O75380, P47985, A0A1B0GTJ7, E9PN17, F1B5L2, Q9BZX2, B4DL14, Q96DP0, O75489, H0YNJ9, Q9H7Q4, Q16768, H0YHN9, B4DE36, P49915, P23526, P25…	0.526727	0.786644	0.00374532
GO:0045892	negative regulation of transcription, DNA-templated	P	1	268	17	6210	0.0588235	0.0431562	over	B4DXI2	Q9H7S9, Q96LA8, Q8N108, B5BTZ6, Q9UBB5, Q53RD8, A5YKK6, E7ETD6, H3BT57, A8K2R3, P27348, B3KM81, Q13363, Q15545, P62805, H0YLC5, Q3SY98, C8C069, B3KRT9, B2RAI2, E7ES08, E9PQX9, O75381, A0A0C4DFT3, H0UI99, Q6NX55, A8K6Y1, C9J7T7, J3QR41, Q96EB6, Q2MJK0, Q96IZ0, Q59FM7, Q9NYF8, Q9NRY4, O75367, Q99471, K7EIU4, H6TXS1, Q5T5X7, H0Y589, V9GY66, E9PMQ6, C9JRJ5, B4DXI2, B3KUJ5, Q01105, P17096, Q9UJU1, A8K…	0.52808	0.786644	0.00373134
GO:0031224	intrinsic component of membrane	C	2	632	17	6210	0.117647	0.101771	over	Q9BYH2, Q9UDW1	Q9UHN6, A0A024R798, A0A024R3R5, O14672, P52799, Q8NE86, B2RAH2, A7BI36, Q6PJ25, O00391, H3BST5, O14662, B2R6S9, P07996, B4DL02, A8K556, Q92968, P49257, K7EKE8, B9A067, D6RIZ4, C8C069, P37268, Q9NR77, A0A024R0K5, E7EM50, Q6ZWP8, J3QRU4, A0A0C4DFT3, F8W031, Q8N4V1, O15400, Q9UKV5, P10809, P07602, D6RF69, O95219, Q8NEW0, B4DJN0, B4DN54, A0A024RCT1, G5E9Z2, Q06124, Q12846, A8KAQ3, A0A0B4J206, Q3KRG8,…	0.528356	0.786644	0.00316456
GO:0003676	nucleic acid binding	F	5	1721	17	6210	0.294118	0.277134	over	B4DXI2, K7ER90, A0A1B0GVI7, B4DUP5, Q96AE4	A8K2Q6, Q0VGA5, O75940, Q9BYG3, Q92973, B4DEA3, A8K2R3, A8K330, E7EMW7, Q9BQ69, A0A024R5U7, Q9H4L7, H0Y6H0, B4DVD6, S4R3H4, Q8NDV7, B3KY11, B2RAI2, P0CJ79, P16104, P62487, D3DPC4, B2R8X4, Q99598, Q8WXA9, A8K6Y1, Q9Y285, O15405, A6NHL2, P10809, B4DMT5, P27694, Q9UKV8, Q86SY9, B4DMT1, A0A024R5X6, E9PEQ6, A0A087WZT0, Q1ED39, B4DVE4, Q6MZZ4, Q8N442, A8K2T5, Q9Y6A4, K7EKI4, F8WFB0, P26358, P54886, F5H…	0.52908	0.786644	0.00290529
GO:0019866	organelle inner membrane	C	1	269	17	6210	0.0588235	0.0433172	over	Q9UDW1	O75947, A0A024R3R5, Q9H845, K9J7I2, Q9UEH5, O43678, Q8IXM3, Q8NE86, P12532, Q96CP5, Q9NX20, Q02338, Q9UDW1, P13073, C9JBY7, P22695, B4DUQ5, Q96DA6, Q53T76, R4GN43, O95202, P48047, P28331, A0A024R301, Q9UI09, B9A067, Q9NQ50, Q9NRX2, O14561, C9JFR7, O75380, Q9NWR8, Q9UDX5, Q9BUN6, P47985, B3KM95, Q96EB6, E9PN17, F1B5L2, B4DL14, J3KRJ3, Q96DP0, O75489, O43772, B2R9J4, Q9H2W6, E7EQL6, P25705, P18859,…	0.529431	0.786644	0.00371747
GO:1901564	organonitrogen compound metabolic process	P	4	1362	17	6210	0.235294	0.219324	over	Q9UDW1, K7ER90, B4DUP5, Q4G148	Q0VGA5, O75947, Q9UEH5, Q9NQU5, B2RAH2, O00148, E7EVH9, H3BV98, P13073, B2R983, H3BT57, A0A087WXM6, B3KXN9, A8K2R3, B3KRB7, B4DMQ7, Q9Y3Z3, B2RCM2, Q9BQ69, A0A024R669, A8K4T6, D6RBL4, Q9UKU7, P28331, O14561, H0Y6H0, O00154, P52209, Q6QN92, P54868, B2RCM6, Q8NDV7, E9PGT3, O60218, F8VZJ2, P19623, P51116, Q5T0Q6, B1APR7, P62487, P14174, P62241, Q9Y285, P49247, J3QR41, Q6Y1H2, P07602, Q9H2G2, B4DMT5,…	0.530773	0.787046	0.00293686
GO:0044763	single-organism cellular process	P	12	4238	17	6210	0.705882	0.682448	over	Q9BYH2, Q9UDW1, B4DXI2, B4DUP5, A0A1B0GVI7, Q16678, Q5JSB5, B4DWS8, Q4G148, G3V1D1, B7ZL14, Q05BX6	E9PJ81, H0Y6I0, A0A0K2BMD8, B2RAH5, Q8NE86, B2RAH2, E7EVH9, F5GZI3, B2R983, H3BT57, B2R8W4, H3BST5, B3KXN9, B4DEA3, H0Y6I7, Q8N3U4, B4DMQ7, E7EMW7, B4DN44, A0A024R669, Q9H4L4, Q9H4L7, Q9UKU7, Q6IB91, K7EKE8, H0Y6H0, O14561, P52209, B4DVD6, S4R3H4, E9PIX7, H7C5H6, P54868, Q8NDV7, Q8IWJ2, B3KY11, P19623, P62487, B2R8X4, P42858, A8K6Y1, P61158, Q05BX6, Q9UKV5, P07602, Q9UKV8, A0A024R5X6, B4DN54, O14…	0.533893	0.790075	0.00283152	RefSeqs: Q5H9P4, B7ZW30, E5RFK7, B7Z4P1, Q8WUF5, B4DGM3, Q96G03, H7BZ18, A0A087WUN5, A0A024R6E3, Q9HBQ7, Q7L9L4, E9PIF4, B4DGL8, P21796, Q13472, A8K2Q6, Q0VGA5, O75947, Q9Y266, O75940, A0MZ66, Q68E09, Q9HAF1, P13073, O00391, Q9BYG5, Q68E01, A8K2R3, K7EP07, Q92974, A8K330, B4DII5, Q9BQ69, Q92968, Q12834, Q9Y277, Q59EH0, C8C069, Q6QN92, F8WB76, E9PF10, P16104, Q99598, Q9H0C8, Q9Y285, O15400, O15405…
GO:0016192	vesicle-mediated transport	P	2	646	17	6210	0.117647	0.104026	over	B7ZL14, Q05BX6	D6RF48, F2Z2V0, Q969L2, B3KM89, F5H157, H0Y6I0, A0A0K2BMD8, Q9NRW7, P61020, Q562L9, B4DYI0, J3QRV5, O00391, O15511, Q9UK41, Q53S54, O14662, Q0JRZ9, P61026, B2R6S9, P59190, P07996, B4DHG4, P49257, Q12955, Q5JVZ8, Q8IWJ2, P51116, A5YP36, J3QRU4, P42858, P61158, O15400, Q92845, Q05BX6, Q6NX51, P07602, Q9H5M4, A8K103, Q13813, Q12965, O95219, Q12846, A8KAQ3, Q9BR76, Q5T0N5, Q3KRG8, O00291, P61160, B4D…	0.540745	0.797996	0.00309598
GO:0022892	substrate-specific transporter activity	F	1	278	17	6210	0.0588235	0.0447665	over	Q9BYH2	O75947, Q8NCD8, Q8TD43, H0YDD9, A0A024R798, Q16864, A0A0A0MTB0, Q9Y2G3, P35658, Q8NE86, B2RAH2, B3KUH0, Q9H0U3, A0A0S2Z5C8, Q6PJ25, P13073, B7Z2Y2, Q14571, P60059, Q99808, Q9BSK2, B4DUQ5, Q96QK1, Q14573, B4DII5, P48047, Q9Y277, Q9NRX5, D6RIZ4, A8K6H9, Q99598, Q9NWR8, P47985, Q8N697, E9PN17, B4DL14, Q8NEW0, M0R106, O43772, A8KA01, Q96P70, P25705, P18859, B2R761, P56385, P27449, P56381, P61966, B4D…	0.541419	0.797996	0.00359712
GO:0044431	Golgi apparatus part	C	1	282	17	6210	0.0588235	0.0454106	over	Q4G148	A0A087WZA6, Q5VYK3, H3BLV0, P18085, B3KUY5, O14672, H0Y6I0, Q9NRW7, Q9H0U4, A4D1B7, B4DYI0, H3BRR0, O00391, B7Z2Y2, O14662, P09496, P61026, P0DJD0, P59190, P49257, Q9UNK0, O75379, J3KQ45, Q8IWJ2, B0AZR9, A0A087X208, J3QRU4, Q96AJ9, Q9H9E3, B2R758, D6RF69, C9J1Z8, H0YLF3, A8K103, A0A0A0MTD6, Q8WVM8, O75487, A0A024RCT1, Q96NT0, A8KA01, Q5T6Z8, P51809, B3KNL8, A0A024R5H8, B8ZZI9, B4DIK4, P61966, Q9C…	0.546655	0.803063	0.0035461
GO:0051603	proteolysis involved in cellular protein catabolic process	P	1	283	17	6210	0.0588235	0.0455717	over	Q53EY9	E9PJ81, G5E9G6, Q9ULV8, Q5VYK3, B3KS40, Q86TM6, P48729, I3L412, A0A0A0MSQ3, O60566, B4DIZ2, P15374, B4E1G1, H3BT57, Q9UK41, Q53S54, B4DEA3, P22694, A0A075B784, Q14694, E7EMW7, A8K4T6, A0A0D9SG71, E5RJR5, Q12834, B7Z4N7, Q5VTR2, J3QR41, P61956, Q9UKV5, Q96EB6, A8K103, Q13257, A0A024R4V8, Q9P0P0, P35998, B4DUC2, A0A0B4J206, A0AVT1, Q9P119, A8K4G7, A0A0G2JNZ5, Q86WA8, Q16531, P40306, G3XAG7, P61289,…	0.547955	0.803063	0.00353357
GO:0032268	regulation of cellular protein metabolic process	P	3	1023	17	6210	0.176471	0.164734	over	K7ER90, B4DXI2, B4DUP5	E9PJ81, B2RAH5, Q9NQU5, O00148, Q68E09, Q5JR08, F5GZI3, H3BV98, E7ETD6, H3BT57, B4DEA3, H0YN81, A8K2R3, B3KRB7, Q92974, E7EMW7, B4DL02, A8K4T6, A8K556, D6RBL4, Q12834, Q5VTR2, C8C069, Q8NDV7, E9PGT3, P51116, Q96EB1, A0A0C4DFT3, P14174, P42858, O15405, Q96EB6, P10809, Q9H2G2, B4DMT5, A8K103, Q9UKV8, Q06124, H6TXS1, Q5T6Z8, U3KQC1, B4DXI2, C9JRJ5, P40429, P63104, B4DL06, P62258, P26358, Q59EJ8, Q59…	0.54814	0.803063	0.00293255
GO:0072657	protein localization to membrane	P	1	285	17	6210	0.0588235	0.0458937	over	Q5JSB5	C9K025, F5H157, Q5JSB5, H0Y6I0, P62917, E9PQW0, Q5VV41, P11441, B2R7D7, Q96HI4, Q9H0U4, A0A024RCR6, F5GZI3, A0A087WXM6, P46783, P61026, P0DJD0, I3L3P7, E7EVY0, P27348, H3BN98, B3KRB7, B4DYY3, P59190, A0A0C4DGE4, B4DWW0, Q9UNK0, Q12955, O75379, P46781, Q86YV9, Q8IWJ2, A0A087X208, A8K3B6, B4DRL9, K7EJT5, A0A0C4DFT3, P62241, O15400, P60866, P46779, B4DV31, P46778, P50395, P25398, Q13136, B3KS61, B4D…	0.550545	0.804535	0.00350877
GO:1901362	organic cyclic compound biosynthetic process	P	4	1394	17	6210	0.235294	0.224477	over	B4DXI2, A0A1B0GVI7, Q5JSB5, Q96AE4	O75947, A0A024R3R5, B2RAH5, Q9NQU5, Q9BRZ2, O00148, B2RAH2, Q68E09, E7EVH9, H3BV98, H3BT57, E7ETD6, A0A087WXM6, B3KRB0, Q68E01, B3KRB7, H0YN81, A8K2R3, A0A140VKC0, Q92974, B2R506, A0A024R669, Q9H4L7, H0Y6H0, O00154, Q5VTR2, B4DVD6, Q05048, C8C069, P37268, E9PGT3, P0CJ79, B2RAI2, F8VZJ2, O60216, Q96EB1, P62487, A0A0C4DFT3, B2R8X4, A0A087WXN4, P62241, Q2VIN3, Q6NX55, A8K6Y1, Q9Y285, A0A0A8K8C0, B3K…	0.551336	0.804535	0.00286944
GO:0016567	protein ubiquitination	P	1	288	17	6210	0.0588235	0.0463768	over	Q53EY9	E9PJ81, G5E9G6, Q9ULV8, Q8NC42, Q86TM6, Q9BRZ2, I3L412, A0A0A0MSQ3, Q9C0C9, O60566, B4DIZ2, B4E1G1, H3BT57, Q9UK41, Q53S54, H0YKB8, Q6PIA0, A8K2R3, B3KM81, E7EMW7, Q7Z7E8, A8K4T6, A0A0D9SG71, E5RJR5, Q12834, Q8NEX1, Q6PJD5, B7Z4N7, Q5VTR2, B4DG67, V9GY54, A0A0A6YYC7, B4DYZ9, J3QR41, Q9NPD8, Q9UKV5, Q96EB6, A8K103, Q13257, Q9P0P0, A0A024RB10, P35998, H6TXS1, A0A0B4J206, A0AVT1, A0A142I7X2, Q9NX47,…	0.554403	0.806326	0.00347222
GO:0050896	response to stimulus	P	8	2851	17	6210	0.470588	0.459098	over	Q9BYH2, B4DXI2, B4DUP5, A0A1B0GVI7, Q16678, Q5JSB5, B4DWS8, Q05BX6	A8K2Q6, E9PJ81, A0A0K2BMD8, B2RAH5, Q8NE86, B2RAH2, A0MZ66, Q68E09, Q9HAF1, F5GZI3, B2R983, H3BT57, H3BST5, Q68E01, B4DEA3, H0Y6I7, A8K2R3, E7EMW7, Q92974, Q9BQ69, B4DN44, A0A024R669, Q92968, Q9H4L7, Q6IB91, K7EKE8, Q59EH0, H0Y6H0, B4DVD6, S4R3H4, E9PIX7, C8C069, P54868, F8WB76, H7C5H6, Q8NDV7, A0A024R1M8, B3KY11, B2RAI2, P16104, B2R514, P62487, B2R8X4, P42858, Q9H0C8, P61158, O15400, O15405, Q05…	0.556095	0.806326	0.00280603
GO:0065009	regulation of molecular function	P	3	1035	17	6210	0.176471	0.166667	over	B4DUP5, B4DWS8, G3V1D1	E9PJ81, F2Z2V0, M0QZS0, B2RAH5, Q9NQU5, B2RAH2, Q68E09, Q9BYG3, Q5JR08, B2R983, H3BV98, H3BT57, A8K2R3, B3KRB7, B2R6S9, B2R506, Q92974, B4DL02, A8K4T6, A8K556, Q12834, B4E0W3, Q59EH0, Q5T123, C8C069, F8WB76, E9PGT3, P51116, Q96EB1, A0A0C4DFT3, P42858, Q6NX55, J3QR41, O15405, Q96EB6, Q9UKV5, P10809, Q9H2G2, A8K103, F5H136, A0A024R5X6, Q12846, A8KAQ3, B7ZKY2, B4DL06, P63104, P62258, F8WFB0, Q59GN8,…	0.556717	0.806326	0.00289855
GO:0006812	cation transport	P	1	290	17	6210	0.0588235	0.0466989	over	G3V1D1	Q658P3, O75947, Q8TD43, H0YDD9, A0A024R798, Q16864, K9J7I2, P19174, Q9UEH5, Q9Y2G3, B2RAH5, Q8NE86, B2RAH2, A0A0S2Z5C8, Q9H0U3, B2R983, P13073, Q6PJ25, Q14571, P22694, P27348, Q14573, R4GN43, Q12955, P28331, P48047, Q9UI09, P58546, F8WB76, B3KWN0, A0A0C4DFT3, P42858, Q9NWR8, P47985, B4E2J2, E5RFJ9, Q8N697, Q8IWZ3, Q8N335, E9PN17, P22466, F1B5L2, B4DL14, H0YLF3, Q96DP0, Q9ULH0, Q8NEW0, O75489, A0A…	0.556958	0.806326	0.00344828
GO:0010604	positive regulation of macromolecule metabolic process	P	3	1039	17	6210	0.176471	0.167311	over	A0A1B0GVI7, Q5JSB5, Q96AE4	B2RAH5, Q9NQU5, B2RAH2, O00148, Q68E09, Q5JR08, H3BT57, E7ETD6, H0YN81, A8K2R3, B3KRB7, Q92974, B2R506, B4DL02, A0A024R669, A8K4T6, Q9H4L7, Q12834, Q5VTR2, E9PIX7, C8C069, E9PGT3, P51116, B1APR7, P62487, B2R8X4, P14174, Q2VIN3, O15405, J3QR41, Q96EB6, P10809, Q9H2G2, B4E0X8, A8K103, Q9UKV8, F5H136, A0A024R5X6, H6TXS1, B4DXI2, H0YJ25, Q6MZZ4, B4DL06, P63104, B2R6U9, P26358, F8WFB0, Q59EJ8, Q59GN8,…	0.559558	0.808495	0.00288739
GO:0065007	biological regulation	P	11	3934	17	6210	0.647059	0.633494	over	B4DXI2, K7ER90, A0A1B0GVI7, B4DUP5, Q16678, Q5JSB5, B4DWS8, Q96AE4, G3V1D1, B7ZL14, Q05BX6	E9PJ81, H0Y6I0, A0A0K2BMD8, B2RAH5, Q8NE86, B2RAH2, F5GZI3, B2R983, H3BT57, H3BST5, B4DEA3, Q8N3U4, B4DMQ7, O14545, E7EMW7, Q9H4L5, B4DN44, A0A024R669, Q9H4L4, Q9H4L7, A0A024R5U7, Q9UKU7, K7EKE8, H0Y6H0, B4DVD6, S4R3H4, E9PIX7, H7C5H6, Q8NDV7, Q8IWJ2, B3KY11, P0CJ79, B2RAI2, P62487, B2R8X4, P42858, Q8WXA9, A8K6Y1, P61158, Q05BX6, Q9UKV5, B4DMT5, P07602, Q9UKV8, B4DMT1, A0A024R5X6, A0A087WZT0, Q5T…	0.562581	0.811115	0.00279614
GO:0044257	cellular protein catabolic process	P	1	297	17	6210	0.0588235	0.0478261	over	Q53EY9	E9PJ81, G5E9G6, Q9ULV8, Q5VYK3, B3KS40, Q86TM6, P48729, I3L412, A0A0A0MSQ3, O60566, B4DIZ2, P15374, B4E1G1, H3BT57, Q9UK41, Q53S54, B4DEA3, P22694, A0A075B784, Q14694, E7EMW7, A8K4T6, E5RJR5, A0A0D9SG71, Q12834, B7Z4N7, Q5VTR2, J3QR41, P61956, Q9UKV5, Q96EB6, A8K103, Q13257, A0A024R4V8, Q9P0P0, P35998, B4DUC2, A0A0B4J206, A0AVT1, Q9P119, A8K4G7, A0A0G2JNZ5, Q86WA8, Q16531, Q9UJU1, P40306, G3XAG7,…	0.565792	0.811115	0.003367
GO:0070201	regulation of establishment of protein localization	P	1	297	17	6210	0.0588235	0.0478261	over	Q5JSB5	H0YNH5, H0YDD9, Q8TD43, B3KS40, Q5JSB5, P10599, Q5VV41, Q8NE86, B2R7D7, B2RAH2, Q96HI4, Q68E09, J3QRV5, Q5JR08, Q14571, Q9UK41, P0DJD0, A0A075B784, P27348, B4DPW9, Q14573, A8K330, E7EMW7, A0A0C4DGE4, Q16512, Q16513, H0YNG9, B5BTY5, A0A169TED2, B0AZR9, Q8IWJ2, E7ES08, A8K3B6, A0A140TA28, J3QRU4, A0A0C4DFT3, P14174, P09382, P46779, Q96EB6, A8K2S7, P50395, Q13136, A0A024R4V8, F5H136, Q8WVM8, O75369,…	0.565792	0.811115	0.003367
GO:0072521	purine-containing compound metabolic process	P	1	297	17	6210	0.0588235	0.0478261	over	Q9UDW1	O75947, B4DY91, Q16864, F8VYY9, K9J7I2, Q9UEH5, P30085, A0A087WVZ9, O43678, Q8TCS8, B4DIZ6, Q9UDW1, A4UCT0, P13073, P36871, P07195, Q9NTK5, P22695, E9PB90, Q9BSK2, Q9Y3Z3, P07996, Q9BQ69, D3DXC9, B3KT70, R4GN43, S4R3X7, Q5ZEY3, P28331, B4DDQ8, P48047, Q9UI09, O14561, O00154, J3KRW8, C9JFR7, B4DG62, B0AZR9, O60218, O75380, P62487, P22102, A0A1B0GTJ7, P47985, E9PN17, F1B5L2, B4DL14, Q96DP0, O75489,…	0.565792	0.811115	0.003367
GO:0009987	cellular process	P	15	5343	17	6210	0.882353	0.860386	over	Q16678, Q5JSB5, Q4G148, G3V1D1, Q53EY9, Q9BYH2, Q9UDW1, B4DXI2, K7ER90, B4DUP5, A0A1B0GVI7, B4DWS8, Q96AE4, B7ZL14, Q05BX6	E9PJ81, H0Y6I0, A0A0K2BMD8, B2RAH5, Q8NE86, B2RAH2, E7EVH9, F5GZI3, B2R983, H3BT57, B2R8W4, H3BST5, B3KXN9, B4DEA3, H0Y6I7, Q8N3U4, B4DMQ7, E7EMW7, B4DN44, A0A024R669, Q9H4L5, Q9H4L4, Q9H4L7, A0A024R5U7, Q9UKU7, Q6IB91, K7EKE8, O14561, H0Y6H0, P52209, B4DVD6, S4R3H4, E9PIX7, P54868, H7C5H6, Q8NDV7, Q8IWJ2, B3KY11, P0CJ79, B2RAI2, P19623, P62487, B2R8X4, D3DPC4, P42858, Q8WXA9, A8K6Y1, P61158, Q05…	0.569367	0.81465	0.00280741	RefSeqs: A0A0D9SFB3, Q8N0Z8, Q7RTQ9, B5MCK8, Q6P2Q9, Q8WUH2, B7Z532, Q5TEC6, B5BU16, B2RD36, A8MYV4, E7EV99, E9PID8, A0JP11, Q14789, Q7RTP6, P19474, A0A0C4DG40, F6SDV2, A0A0C4DG44, B4DXM6, O60344, Q6FG43, Q9HC35, Q9BZS5, Q9HC36, Q5H9P4, B7ZW30, E5RFK7, B7Z4P1, B4DGM5, Q8WUF5, Q9P0U0, B4DGM3, Q7RU05, Q96G03, H7BZ18, F8WDR2, A0A087WUN5, A0A024R6E3, Q9HBQ7, Q7L9L4, B2RD51, Q6ZQN2, E9PIF4, Q9UHV9, B4…
GO:0071310	cellular response to organic substance	P	2	683	17	6210	0.117647	0.109984	over	A0A1B0GVI7, Q16678	Q9H7S9, H0YDD9, F2Z2V0, M0QZS0, A5YKK6, B2RAH2, Q8TDD1, Q5JR08, F5GZI3, H3BV98, H3BT57, E7ETD6, H0YFI1, P60059, P49137, P27348, B3KRB7, B3KM81, P07996, Q9Y3Z3, E7EMW7, Q92974, B4DL02, A8K4T6, B4DHI1, P54868, C8C069, E9PGT3, O60218, P62487, Q2VIN3, P63218, Q92841, Q6NX55, C9J7T7, Q96EB6, Q9UKV5, A8K103, Q9UKV8, Q06124, Q12846, B2RBL9, A8KAQ3, Q9BR76, H6TXS1, P16435, B7ZKY2, B3KVL0, B3KUJ5, P32929,…	0.572525	0.816994	0.00292826
GO:0055085	transmembrane transport	P	1	303	17	6210	0.0588235	0.0487923	over	Q9BYH2	O75947, H0YDD9, Q8TD43, Q8NCD8, A0A024R798, Q16864, P19174, E9PQW0, Q9Y2G3, B2RAH5, Q8NE86, B2RAH2, Q59E87, A0A0S2Z5C8, Q9H0U3, B2R983, Q14571, P22694, P61026, Q9BSK2, P27348, Q9P2B4, P07996, Q14573, B4DWW0, Q92968, Q53FL4, Q12955, P48047, Q9Y277, D6RIZ4, P58546, F8WB76, P41091, A8K6H9, O75381, A0A0C4DFT3, P42858, Q9NWR8, P20042, B4E2J2, Q8IWZ3, B4DV31, E9PN17, P22466, Q8N335, J3KRJ3, B4DL14, Q9U…	0.573231	0.816994	0.00330033
GO:0019058	viral life cycle	P	1	306	17	6210	0.0588235	0.0492754	over	K7ER90	A8K2Q6, B8ZZL5, C9K025, P62917, P35658, P13984, O00148, Q9H0U4, B3KUH0, H3BV98, B4E1G1, H3BT57, A0A087WXM6, Q9UK41, Q9BW27, P46783, H0YKB8, P0DJD0, I3L3P7, H3BN98, Q8WUM0, B4DII5, Q13363, B7ZKK7, Q16513, K7EKE8, P46781, E9PF10, P51116, K7EJT5, P62487, P09382, P62241, P60866, P46779, P46778, B4DMT5, P25398, E9PEQ6, Q53HS1, P51808, A8K4G7, A0A142I7X2, P18615, B3KUJ5, P40429, Q16531, Q9BRG1, A0A024R…	0.576906	0.819957	0.00326797
GO:0008219	cell death	P	2	689	17	6210	0.117647	0.11095	over	A0A1B0GVI7, Q5JSB5	I3L4A2, A8K2Q6, M0QZS0, O75940, A0A0K2BMD8, Q5VV41, Q9NQU5, A0A0C4DFU1, Q96HI4, Q5JR08, B2R7U4, Q8NB16, A0A024RCR6, H3BT57, O00273, F8VYH9, H3BST5, Q53S54, P27348, A8K2R3, B3KRB7, B3KM81, B4DMQ7, P07996, Q92974, O14681, P28331, Q9Y277, S4R3H4, C8C069, E9PGT3, C9JFR7, Q5T0Q6, A0A024R0K5, P42858, P14174, B3KUI2, Q92841, Q6NX55, J3QR41, O15405, P10809, Q96EB6, Q9H2G2, A8K103, A8MX75, Q9NYF8, B4DJN0,…	0.577545	0.819957	0.00290276
GO:0022402	cell cycle process	P	2	694	17	6210	0.117647	0.111755	over	B4DXI2, Q5JSB5	I3L4A2, Q9Y266, F5H157, B2RAH5, A5YKK6, O00148, A0A0A0MSQ3, O60566, Q5JR08, B3KUH0, H3BT57, F8VYH9, Q96JM3, Q9BVA1, H0YFI1, Q53S54, Q68E01, Q8N3U4, Q9ULW0, P49137, P07996, A8K4T6, Q9H4L7, Q12834, Q12955, E9PIX7, P16104, A0A024R307, O60216, J3QS66, A0A0C4DFT3, P42858, P14174, A8K6Y1, J3QR41, Q9ULX6, Q2MJK0, A0A024RD28, Q9H5M4, P27694, A0A024R4V8, Q86SY9, A8MX75, B4DM33, A0A024RB10, A0A024RBR1, Q9N…	0.581698	0.82426	0.00288184
GO:0009117	nucleotide metabolic process	P	1	313	17	6210	0.0588235	0.0504026	over	Q9UDW1	O75947, B4DY91, P37837, Q16864, F8VYY9, K9J7I2, Q9UEH5, P30085, O43678, B4DIZ6, Q9UDW1, A4UCT0, P36871, P13073, P07195, Q9NTK5, P22695, E9PB90, Q9BSK2, B4DMQ7, Q9Y3Z3, P07996, B3KT70, R4GN43, Q5ZEY3, S4R3X7, P28331, B4DDQ8, P48047, Q9UI09, O14561, P52209, O00154, J3KRW8, C9JFR7, B4DG62, B0AZR9, O60218, O75380, Q6IA69, P22102, P47985, A0A1B0GTJ7, P49247, E9PN17, Q8N335, F1B5L2, Q9BZX2, O95336, B4D…	0.585365	0.826327	0.00319489
GO:0051246	regulation of protein metabolic process	P	3	1076	17	6210	0.176471	0.173269	over	K7ER90, B4DXI2, B4DUP5	E9PJ81, B2RAH5, Q9NQU5, O00148, Q68E09, Q5JR08, F5GZI3, H3BV98, E7ETD6, H3BT57, B4DEA3, H0YN81, A8K2R3, B3KRB7, Q92974, E7EMW7, B4DL02, A8K556, A8K4T6, Q9H4L4, D6RBL4, Q12834, Q5VTR2, C8C069, Q8NDV7, E9PGT3, P51116, Q96EB1, A0A0C4DFT3, P14174, P42858, O15405, Q96EB6, P10809, Q9H2G2, B4DMT5, A8K2S7, A8K103, Q9UKV8, Q06124, H6TXS1, Q5T6Z8, U3KQC1, B4DXI2, C9JRJ5, P40429, P63104, B4DL06, P62258, P26…	0.585409	0.826327	0.0027881
GO:1902578	single-organism localization	P	3	1079	17	6210	0.176471	0.173752	over	Q9BYH2, Q5JSB5, G3V1D1	O75947, F5H157, H0Y6I0, Q9UEH5, A0A0K2BMD8, Q8NE86, B2RAH2, Q68E09, F5GZI3, B2R983, P13073, H3BT57, O00391, A0A087WXM6, H3BST5, Q92973, B3KRB7, E7EMW7, B4DII5, Q9H4L5, Q92968, Q9Y277, P28331, H7C5H6, F8WB76, Q8IWJ2, A0A024R1M8, E9PF10, A0A0C4DFT3, P42858, P14174, P62241, P61158, O15400, Q6NX51, Q96EB6, P07602, J3KRJ3, B4DL14, A8K103, B4DN54, Q06124, Q12846, A8KAQ3, Q5T0N5, Q5T6Z8, Q96P70, B7ZKY2,…	0.58747	0.827645	0.00278035
GO:0030234	enzyme regulator activity	F	1	316	17	6210	0.0588235	0.0508857	over	Q05BX6	P36507, O95433, F8VYY9, P18085, B2RAH5, F2Z2E2, I3L412, Q59E87, Q53RT9, F8VYH9, A0A0D9SF70, Q6PIA0, A1A4S6, D6RHI7, Q9HAV7, A3E0Z5, B7ZKK7, Q12834, B4E0W3, Q59EH0, P12429, Q5T123, Q3SY98, C8C069, E9PGT3, J3QS66, Q9UBT2, B4DRL9, Q9UD71, Q96EB1, A0A096LP07, B3KUI2, I3L425, P60983, Q05BX6, Q2MJK0, P07602, P50395, C9J1Z8, Q15435, A8K103, Q9UK58, F8W9Y7, Q9NRY4, H0Y465, O75367, Q12846, Q9P119, Q01105,…	0.588941	0.828128	0.00316456
GO:0006753	nucleoside phosphate metabolic process	P	1	319	17	6210	0.0588235	0.0513688	over	Q9UDW1	O75947, B4DY91, P37837, Q16864, F8VYY9, K9J7I2, Q9UEH5, P30085, O43678, B4DIZ6, Q9UDW1, A4UCT0, P36871, P13073, P07195, Q9NTK5, P22695, E9PB90, Q9BSK2, B4DMQ7, Q9Y3Z3, P07996, B3KT70, R4GN43, Q5ZEY3, S4R3X7, P28331, B4DDQ8, P48047, Q9UI09, O14561, P52209, O00154, J3KRW8, C9JFR7, B4DG62, B0AZR9, O60218, O75380, Q6IA69, P22102, P47985, A0A1B0GTJ7, P49247, E9PN17, Q8N335, F1B5L2, Q9BZX2, O95336, B4D…	0.592488	0.829936	0.0031348
GO:0051050	positive regulation of transport	P	1	319	17	6210	0.0588235	0.0513688	over	Q5JSB5	H0YNH5, H0YDD9, D6RF48, Q8TD43, B3KS40, Q5JSB5, P19174, P18085, Q8NE86, B2RAH2, Q96HI4, I3L412, P61020, Q68E09, B2RAY1, Q9UBS0, Q5JR08, B2R983, Q9UK41, P61026, P22694, A0A075B784, P27348, P59190, B4DUQ1, A8K330, E7EMW7, A0A0C4DGE4, Q16512, Q12955, H0YNG9, Q16513, B5BTY5, A0A169TED2, E7ES08, P51116, A8K3B6, A0A140TA28, J3QRU4, A0A0C4DFT3, P42858, P14174, P09382, P46779, Q8N335, P22466, C9J1Z8, H0Y…	0.592488	0.829936	0.0031348
GO:0006325	chromatin organization	P	1	327	17	6210	0.0588235	0.052657	over	B4DXI2	Q96LA8, G5E9G6, Q8N108, B3KS40, Q9UBB5, B4DG57, I3L412, Q9HAF1, Q562L9, Q9H7B4, H3BT57, E7ETD6, H0Y6I7, A8K2R3, H0YN81, H7C212, F2Z2U4, Q13363, E7EMW7, Q9H4L7, Q15545, D3DS96, Q16512, E5RJR5, A0A0D9SG71, P62805, H0Y6H0, I3VM54, A0A169TED2, Q5VTR2, B3KRT9, Q7LBC6, E7ES08, H0Y3R4, P16104, B1APR7, Q96EB1, A0A0A8K8C0, J3QR41, H7C3U5, Q96EB6, Q9ULX6, Q2MJK0, A0A024RD28, Q12962, B2R5B6, A8K103, O95696,…	0.601807	0.837306	0.0030581
GO:0003008	system process	P	1	327	17	6210	0.0588235	0.052657	over	Q16678	Q13237, Q8TD43, P15924, Q53SF4, B2RAH5, Q9UBB5, B2RAH2, A0A0A0MTB8, Q562L9, Q9UBS0, A4UCT0, B2R7U4, Q9H0U3, B2R983, Q14571, P43034, P22694, Q14573, Q96DA6, O75828, Q12955, A0A087WU84, Q59EH0, H0YME5, P58546, F8WB76, B0AZR9, E9PGT3, B3KWN0, Q9Y2H2, B4DRL9, B1APR7, A0A0C4DFT3, P42858, P67936, Q8IWZ3, Q8N335, P22466, Q12965, Q9ULH0, A0A024R5X6, H0Y465, B3KP05, K7EIU4, P16435, B7ZKY2, B3KVL0, P61160,…	0.601807	0.837306	0.0030581
GO:0051240	positive regulation of multicellular organismal process	P	1	327	17	6210	0.0588235	0.052657	over	Q16678	Q9H7S9, Q8TD43, F2Z2V0, Q14444, P19174, H0Y6I0, M0R205, B5BTZ6, Q53SF4, P52799, B2RAH2, A0MZ66, B2R7U4, Q5JR08, B2R983, H3BT57, P43034, P07996, Q92974, Q14451, C9J185, B7ZKK7, Q16512, Q12834, Q16513, P12429, B5BTY5, A0A169TED2, S4R3H4, P58546, C8C069, O75131, E7ES08, A0A087X208, F8VZJ2, Q96F46, A8K3B6, B2R8X4, P14174, P09382, I3L425, O15405, Q96EB6, P10809, P22466, Q6LCB0, H0YLF3, Q9Y2Y8, O95219,…	0.601807	0.837306	0.0030581
GO:0005789	endoplasmic reticulum membrane	C	1	329	17	6210	0.0588235	0.0529791	over	Q16678	E9PJ81, H0YNH6, D6RF48, A0A024R3R5, D3DP46, B3KM89, Q86TM6, E9PQW0, Q5VV42, Q9Y5M8, Q9NRW5, Q9Y3I0, O60568, A7BI36, Q9H0U4, B2R7U4, Q5JR08, B4DHX0, Q9HBH5, Q9H0U3, B4E1G1, Q14571, P60059, P61026, H3BN98, P08842, Q14573, B4DHG3, C9J185, Q8TC12, H0YNG3, Q92604, P49257, Q5JRA6, Q5UCC4, Q9NRX5, P37268, E7EM50, P30519, Q8N4V1, B3KRC6, E5RFJ9, Q6Y1H2, Q9UKV5, Q6NUM7, B3KSW0, B3KS61, A0A024RCT1, Q53GQ0,…	0.604105	0.83821	0.00303951
GO:0031966	mitochondrial membrane	C	1	333	17	6210	0.0588235	0.0536232	over	Q9UDW1	O75947, Q9H845, K9J7I2, Q9UEH5, O43678, Q8IXM3, P12532, Q8NE86, Q96CP5, Q9NX20, Q02338, Q9UDW1, P13073, C9JBY7, H3BST5, P22695, E7EVY2, B4DUQ5, E9PB90, Q9BSK2, Q15785, E7EVY0, Q96DA6, Q53T76, R4GN43, O95202, P28331, A0A024R301, Q9Y277, P48047, Q9UI09, Q9NQ50, Q9NRX2, B9A067, O14561, Q3SY98, C9JFR7, B4DG62, O75380, A0A096LP07, Q9UDX5, Q9NWR8, Q9BUN6, P47985, B3KM95, E9PN17, F1B5L2, Q6NUM7, B4DL14,…	0.608664	0.839757	0.003003
GO:0005215	transporter activity	F	1	334	17	6210	0.0588235	0.0537842	over	Q9BYH2	O75947, Q8NCD8, Q8TD43, H0YDD9, A0A024R798, F2Z2V0, Q16864, A0A0A0MTB0, Q9Y2G3, P35658, Q8NE86, B2RAH2, Q59E87, B3KUH0, Q9H0U3, A0A0S2Z5C8, Q6PJ25, P13073, B7Z2Y2, Q14571, P60059, Q99808, B4DUQ5, Q9BSK2, Q96QK1, Q14573, Q8WUM0, B4DII5, P48047, Q9Y277, Q9NRX5, D6RIZ4, O75131, A8K6H9, Q99598, Q9NWR8, P47985, Q8N697, E9PN17, B4DL14, Q8NEW0, M0R106, O43772, A0A024RCT1, A8KA01, Q96P70, Q01469, A0A142I…	0.609796	0.839757	0.00299401
GO:0042175	nuclear outer membrane-endoplasmic reticulum membrane network	C	1	337	17	6210	0.0588235	0.0542673	over	Q16678	E9PJ81, H0YNH6, D6RF48, A0A024R3R5, B3KM89, D3DP46, E9PQW0, Q5VV42, Q86TM6, Q9Y5M8, Q9NRW5, Q9Y3I0, O60568, A7BI36, Q9H0U4, B2R7U4, Q5JR08, B4DHX0, Q9HBH5, Q9H0U3, B4E1G1, Q14571, P60059, P61026, P08842, H3BN98, Q14573, B4DHG3, C9J185, Q8TC12, H0YNG3, Q92604, P49257, Q5JRA6, Q5UCC4, Q9NRX5, P37268, E7EM50, P30519, Q8N4V1, B3KRC6, E5RFJ9, Q6Y1H2, Q9UKV5, Q6NUM7, B3KSW0, B3KS61, A0A024RCT1, Q53GQ0,…	0.613174	0.842827	0.00296736
GO:0016477	cell migration	P	1	340	17	6210	0.0588235	0.0547504	over	Q9BYH2	Q6ZRV2, P19174, O14672, P18085, Q53SF4, Q5VV41, P52799, A0MZ66, B2RAH2, I3L412, B2R7U4, Q5JR08, Q9H0U4, A0A0A0MTS5, Q9BYG5, Q9BVA1, O15511, Q53S54, P43034, P61026, B4DPW9, P07996, Q14451, Q96T04, B4DL02, P27487, Q92968, Q16512, Q16513, P08727, Q5JRA6, P12429, Q5T123, Q5JVZ8, A0A169TED2, Q5VTR2, Q53TG4, Q96PY5, F8W1F5, O75131, C8C069, B4DE20, E7ES08, A0A024R0K5, B2R8X4, P14174, A0A024R8K7, B4E2J5,…	0.616524	0.845847	0.00294118
GO:0030163	protein catabolic process	P	1	343	17	6210	0.0588235	0.0552335	over	Q53EY9	E9PJ81, G5E9G6, Q9ULV8, Q5VYK3, B3KS40, Q86TM6, P48729, I3L412, A0A0A0MSQ3, A0A024RCR6, O60566, B4DIZ2, P15374, B4E1G1, H3BT57, Q9UK41, Q53S54, B4DEA3, Q9BVQ7, P22694, A0A075B784, Q14694, A0A0C4DGG1, E7EMW7, A8K4T6, E5RJR5, A0A0D9SG71, Q12834, B7Z4N7, A0A169TED2, Q5VTR2, B4DQJ4, B4DYZ9, J3QR41, P61956, Q9UKV5, Q96EB6, A8K2S7, A8K103, Q13257, A0A024R4V8, Q9P0P0, P35998, B4DUC2, A0A0B4J206, A0AVT1,…	0.619846	0.84704	0.00291545
GO:0072594	establishment of protein localization to organelle	P	1	343	17	6210	0.0588235	0.0552335	over	Q5JSB5	H0YNH5, B3KS40, C9K025, H0Y6I0, Q5JSB5, P62917, B5BTZ6, E9PQW0, P10599, B2RAH2, Q96HI4, B4DYI0, Q9H0U4, A0A087WXM6, Q92973, P46783, P0DJD0, P61026, A0A075B784, I3L3P7, E9PB90, P27348, Q15785, H3BN98, P59190, A8K330, E7EMW7, B4DII5, B4DWW0, B3KT70, Q92968, H0YNG9, P46781, B3KS56, Q8IWJ2, B4DG62, O75381, A0A140TA28, K7EJT5, P62241, P60866, P46779, Q96EB6, B4DV31, P46778, J3KRJ3, P25398, F5H136, Q14…	0.619846	0.84704	0.00291545
GO:0005768	endosome	C	1	348	17	6210	0.0588235	0.0560386	over	Q05BX6	Q658P3, P36507, Q5VYK3, A0A087WZA6, F5H157, P18085, Q9Y2G3, Q9NRW7, B2RAH2, P61020, K7ELY9, B2RAY1, B3KUH0, Q5JR08, Q9H0U4, A0A0S2Z5C8, Q6PJ25, Q96BM9, H0YFI1, Q9UK41, P09496, P61026, Q96QK1, P08842, P59190, K7EP07, Q14694, H7C331, A0A0C4DGG1, Q16512, Q9UNK0, Q8NEX1, O75379, P12429, B4DG67, Q9Y2H2, J3QRU4, P42858, Q96AJ9, Q8N4V1, O15400, Q05BX6, A6NHL2, P10809, C9J1Z8, H0YLF3, Q9ULH0, O95219, A0A…	0.625324	0.849977	0.00287356
GO:0060341	regulation of cellular localization	P	1	350	17	6210	0.0588235	0.0563607	over	Q5JSB5	H0YNH5, H0YDD9, D6RF48, P36507, B3KS40, Q9UPN1, Q5JSB5, P19174, P10599, Q5VV41, B2R7D7, B2RAH2, K7ELY9, Q96HI4, P48729, P61020, Q5JR08, B2R983, H3BT57, F8VYH9, P22694, P0DJD0, A0A075B784, P27348, B4DPW9, A8K2R3, A8K330, E7EMW7, A0A0C4DGE4, Q16512, Q12955, Q9UNK0, H0YNG9, Q16513, O75379, A0A169TED2, Q8IWJ2, P51116, A8K3B6, A0A140TA28, J3QRU4, A0A0C4DFT3, P42858, O15400, B4E2J2, P46779, Q9ULX6, Q96…	0.627494	0.851351	0.00285714
GO:0007155	cell adhesion	P	1	353	17	6210	0.0588235	0.0568438	over	Q16678	Q9UPN1, H3BLV0, O14672, D3DPU8, P15924, Q53SF4, Q6QNY5, B2RAH5, Q53RD8, P52799, B2R7D7, B2RAH2, Q562L9, Q5JR08, A0A0A0MTS5, Q5T6L6, C9J8U1, B4DPW9, P07996, Q14451, P27487, A0A087WZB5, Q16512, Q16513, K7EKE8, Q5JRA6, Q5JVZ8, A0A169TED2, Q53TG4, C8C069, B0AZR9, E7ES08, A0A024R0K5, A8K3B6, A0A0C4DFT3, A0A024R8K7, P09382, A0A0C4DGV9, B4DU18, P10809, Q2MJK0, Q9H2G2, Q13136, O75369, H0Y465, Q12846, Q06…	0.630727	0.854158	0.00283286
GO:0005740	mitochondrial envelope	C	1	356	17	6210	0.0588235	0.0573269	over	Q9UDW1	O75947, Q9H845, K9J7I2, Q9UEH5, O43678, Q8IXM3, P12532, Q8NE86, Q96CP5, Q8TCS8, Q9NX20, Q02338, Q9UDW1, P13073, C9JBY7, H3BST5, P22695, E7EVY2, Q9BSK2, B4DUQ5, E9PB90, Q15785, E7EVY0, Q96DA6, Q53T76, R4GN43, O95202, P28331, A0A024R301, Q9Y277, P48047, Q9UI09, Q9NQ50, Q9NRX2, B9A067, O14561, Q3SY98, C9JFR7, B4DG62, O75380, A0A096LP07, Q9UDX5, Q9NWR8, Q9BUN6, P47985, B3KM95, E9PN17, F1B5L2, Q6NUM7,…	0.633934	0.855345	0.00280899
GO:0022610	biological adhesion	P	1	358	17	6210	0.0588235	0.057649	over	Q16678	Q9UPN1, H3BLV0, D3DPU8, O14672, P15924, Q6QNY5, Q53SF4, B2RAH5, Q53RD8, P52799, B2R7D7, B2RAH2, Q562L9, Q5JR08, A0A0A0MTS5, C9J8U1, Q5T6L6, B4DPW9, P07996, Q14451, P27487, A0A087WZB5, Q16512, Q16513, K7EKE8, Q5JRA6, Q5JVZ8, A0A169TED2, Q53TG4, C8C069, B0AZR9, E7ES08, A0A024R0K5, A8K3B6, A0A0C4DFT3, A0A024R8K7, P09382, A0A0C4DGV9, B4DU18, P10809, Q2MJK0, Q9H2G2, Q13136, O75369, H0Y465, Q12846, Q06…	0.636057	0.856635	0.0027933
GO:0048870	cell motility	P	1	362	17	6210	0.0588235	0.0582931	over	Q9BYH2	Q6ZRV2, P19174, O14672, P18085, Q53SF4, Q5VV41, P52799, B2RAH2, A0MZ66, I3L412, B2R7U4, Q5JR08, Q9H0U4, A0A0A0MTS5, Q9BYG5, Q9BVA1, O15511, Q53S54, P61026, P43034, B4DPW9, P07996, Q14451, Q96T04, B4DL02, P27487, Q92968, Q16512, Q16513, P08727, Q5JRA6, P12429, Q5T123, Q5JVZ8, A0A169TED2, Q5VTR2, Q53TG4, Q96PY5, F8W1F5, O75131, C8C069, B4DE20, E7ES08, Q9Y2H2, A0A024R0K5, B2R8X4, P14174, A0A024R8K7,…	0.640269	0.856911	0.00276243
GO:0051674	localization of cell	P	1	362	17	6210	0.0588235	0.0582931	over	Q9BYH2	Q6ZRV2, P19174, O14672, P18085, Q53SF4, Q5VV41, P52799, B2RAH2, A0MZ66, I3L412, B2R7U4, Q5JR08, Q9H0U4, A0A0A0MTS5, Q9BYG5, Q9BVA1, O15511, Q53S54, P61026, P43034, B4DPW9, P07996, Q14451, Q96T04, B4DL02, P27487, Q92968, Q16512, Q16513, P08727, Q5JRA6, P12429, Q5T123, Q5JVZ8, A0A169TED2, Q5VTR2, Q53TG4, Q96PY5, F8W1F5, O75131, C8C069, B4DE20, E7ES08, Q9Y2H2, A0A024R0K5, B2R8X4, P14174, A0A024R8K7,…	0.640269	0.856911	0.00276243
GO:0032880	regulation of protein localization	P	1	363	17	6210	0.0588235	0.0584541	over	Q5JSB5	H0YNH5, H0YDD9, Q8TD43, B3KS40, Q5JSB5, P10599, Q5VV41, Q8NE86, B2R7D7, B2RAH2, Q96HI4, P48729, Q68E09, J3QRV5, Q5JR08, H3BT57, Q14571, Q9UK41, O14662, P0DJD0, A0A075B784, P27348, B4DPW9, A8K2R3, Q14573, A8K330, E7EMW7, A0A0C4DGE4, Q16512, Q16513, Q9UNK0, H0YNG9, B5BTY5, A0A169TED2, B0AZR9, Q8IWJ2, E7ES08, A8K3B6, A0A140TA28, J3QRU4, A0A0C4DFT3, P14174, P09382, O15400, P46779, Q96EB6, Q8N335, A8K…	0.641314	0.856911	0.00275482
GO:0044255	cellular lipid metabolic process	P	1	363	17	6210	0.0588235	0.0584541	over	Q16678	B2ZGL7, C9J173, F2Z2V0, B4DUA6, A8MXV4, Q9H845, F8VYY9, P19174, A0A0A0MTB0, Q5HYD9, B4DHX0, Q9HBH5, A0A024R8L7, H0YFI1, B4DJK7, P43155, P43034, P49137, P08842, B4DMQ7, P24752, O75828, Q53T76, Q92604, Q8TC12, Q9UKU7, J3KSI4, O14561, Q4G1C4, O00154, A0A024R5E0, Q9NRX5, Q8N8N7, P54868, P37268, O75131, K7ERC8, O60218, P38117, A0A087X208, Q9Y2H2, E7EM50, Q659C5, P14174, P30084, E9PIH9, B3KRC6, C9J7T7,…	0.641314	0.856911	0.00275482
GO:0032446	protein modification by small protein conjugation	P	1	364	17	6210	0.0588235	0.0586151	over	Q53EY9	E9PJ81, G5E9G6, Q8TD43, Q9ULV8, Q8NC42, Q86TM6, Q9BRZ2, P35658, I3L412, A0A0A0MSQ3, Q9C0C9, O60566, B4DIZ2, B4E1G1, H3BT57, Q9UK41, Q53S54, Q9Y2X3, Q9BW27, H0YKB8, Q8N3U4, P0DJD0, Q6PIA0, A8K2R3, B3KM81, Q8WUM0, E7EMW7, Q7Z7E8, B4DUQ1, F2Z363, A8K4T6, A0A0D9SG71, E5RJR5, Q12834, Q8NEX1, Q6PJD5, B7Z4N7, Q5VTR2, B4DG67, Q9UBT2, O60216, V9GY54, A0A0A6YYC7, B4DYZ9, J3QR41, P61956, Q9NPD8, Q9UKV5, Q96…	0.642357	0.856911	0.00274725
GO:0005102	receptor binding	F	1	365	17	6210	0.0588235	0.0587762	over	Q05BX6	Q9ULV8, G5E9G6, Q5T911, A8MXV4, P19174, P18085, O14672, Q53SF4, Q5VV41, P52799, A5YKK6, B2R7D7, Q8WWQ0, I3L412, Q8TDD1, H3BRR0, A0A0A0MTS5, B4E1G1, A0A024R8L7, Q9BVA1, P61026, P43155, B2R6S9, A8K2R3, P27348, B4DYY3, B3KM81, P07996, O94906, B4DL02, P27487, Q15545, Q2QL34, Q16512, P08727, Q5T123, Q5JVZ8, A0A169TED2, Q53TG4, C8C069, O75131, B4DGW2, E9PHV5, B0AZR9, E7ES08, A8K3B6, O75381, Q9UD71, A0A…	0.643397	0.856911	0.00273973
GO:0007275	multicellular organism development	P	4	1476	17	6210	0.235294	0.237681	under	Q9BYH2, B4DUP5, A0A1B0GVI7, Q16678	F2Z2V0, F5H157, Q9Y266, H0Y6I0, Q9UEH5, B2RAH5, Q9NQU5, B2RAH2, A0MZ66, Q5JR08, F5GZI3, A0A0A0MTS5, H3BT57, E7ETD6, Q9BYG5, H3BST5, Q53S54, H0Y6I7, H0YN81, B3KRB7, A8K2R3, F2Z2U4, Q92974, A8K4T7, B4DL02, A8K4T6, Q9H4L7, Q92968, Q12834, B4E0W3, Q59EH0, P08727, H0Y6H0, Q05048, S4R3H4, E9PIX7, C8C069, P54868, H7C5H6, E9PGT3, B2RAI2, F8VZJ2, P51116, Q5T0Q6, B1APR7, A0A0C4DFT3, B2R8X4, P42858, O15405,…	0.602313	0.837306	0.00271003
GO:0048519	negative regulation of biological process	P	5	1853	17	6210	0.294118	0.29839	under	B4DXI2, A0A1B0GVI7, Q16678, Q5JSB5, G3V1D1	E9PJ81, A8K2Q6, Q9BYG3, F5GZI3, B2R983, H3BT57, O00391, Q68E01, B4DEA3, Q8N3U4, A8K2R3, O14545, Q92974, E7EMW7, Q9BQ69, D6RBL4, Q9H4L7, Q12834, H0Y6H0, S4R3H4, C8C069, Q8NDV7, B2RAI2, B3KY11, P16104, P62487, B2R8X4, P42858, Q99598, Q9H0C8, A8K6Y1, A0A0A8K8C0, O15405, Q96EB6, P10809, A8K2S7, Q9UKV8, E9PEQ6, Q06124, Q5T6Z8, B7ZKY2, Q3KRG8, Q6MZZ4, A8K2T5, P26358, Q59EJ8, B4DMU7, A8MW49, F5H2U8, C9J…	0.605925	0.839124	0.00269833
GO:0006810	transport	P	5	1855	17	6210	0.294118	0.298712	under	Q9BYH2, Q5JSB5, B7ZL14, G3V1D1, Q05BX6	A8K2Q6, O75947, H0Y6I0, A0A0K2BMD8, B2RAH5, Q8NE86, B2RAH2, Q68E09, F5GZI3, B2R983, P13073, H3BT57, O00391, H3BST5, Q92973, K7EP07, B4DII5, E7EMW7, Q92974, A8K330, Q9H4L5, Q92968, Q9Y277, Q59EH0, B4DVD6, F8WB76, H7C5H6, Q8IWJ2, A0A024R1M8, E9PF10, P42858, Q99598, P61158, O15400, Q05BX6, Q96EB6, Q9Y282, P07602, A8K2S7, J3KRJ3, A0A024R5X6, B4DN54, E9PEQ6, Q12846, Q06124, B7ZKY2, Q3KRG8, P61160, Q99…	0.60705	0.839124	0.00269542
GO:0006950	response to stress	P	4	1507	17	6210	0.235294	0.242673	under	B4DUP5, A0A1B0GVI7, Q16678, Q5JSB5	E9PJ81, A8K2Q6, A0A0K2BMD8, Q9NQU5, Q9BRZ2, A0A0C4DFU1, O00148, Q68E09, Q5JR08, H3BV98, H3BT57, O00151, Q68E01, Q53S54, B4DEA3, P60059, B4DGE7, B3KRB7, A8K2R3, Q9Y3Z3, F2Z2U4, E7EMW7, Q92974, A8K4T7, P27487, A0A024R669, B4DL02, Q9BQ69, A8K4T6, Q92968, Q9H4L7, P49257, P08729, K7EKE8, P08727, B4DVD6, S4R3H4, H3BMH3, C8C069, E9PGT3, A0A024R1M8, B2RAI2, O60218, P51116, P16104, B2R514, Q659C4, O60216,…	0.620855	0.84704	0.00265428
GO:0046872	metal ion binding	F	2	746	17	6210	0.117647	0.120129	under	Q16678, G3V1D1	Q9H7S9, Q92618, C9JBI3, Q9ULV8, A8K566, F2Z2V0, B3KM89, Q8NC42, B2R9Y1, A0A0K2BMD8, Q9BRZ2, A0A0C4DFU1, E9PI61, O60568, Q6PJ25, H3BT57, E7ETD6, O00151, Q96JM3, Q92610, H0Y6I7, Q6NZY4, B4DPW9, B4DMQ7, P07996, Q9Y3Z3, B4DHG3, Q53T76, Q75MM6, E7EMW7, Q92974, A0A024R669, O95202, Q8NEX1, Q6IB91, O95205, I3VM54, Q5VTR2, E9PGT3, Q8NB15, P0CJ79, B2RAI2, A0A087WXN4, H0UI99, B3KRC6, P67936, Q9UKV5, Q53RS5,…	0.62331	0.848812	0.00268097
GO:0043169	cation binding	F	2	759	17	6210	0.117647	0.122222	under	Q16678, G3V1D1	Q9H7S9, Q92618, C9JBI3, Q9ULV8, A8K566, F2Z2V0, B3KM89, Q8NC42, B2R9Y1, A0A0K2BMD8, Q9BRZ2, A0A0C4DFU1, E9PI61, O60568, Q6PJ25, H3BT57, E7ETD6, Q96JM3, O00151, Q92610, H0Y6I7, Q6NZY4, B4DPW9, B4DMQ7, P07996, Q9Y3Z3, B4DHG3, Q92974, Q53T76, Q75MM6, E7EMW7, A0A024R669, O95202, Q6IB91, Q8NEX1, O95205, I3VM54, Q5VTR2, Q8NB15, E9PGT3, P0CJ79, B2RAI2, H0UI99, A0A087WXN4, Q9H0C8, B3KRC6, P67936, Q9UKV5,…	0.633256	0.855345	0.00263505
GO:0016491	oxidoreductase activity	F	1	366	17	6210	0.0588235	0.0589372	under	Q16678	Q658P3, A0A024R3R5, Q9H845, K9J7I2, Q9UEH5, A0A0K2BMD8, B2R9Y1, P10599, Q9NRW5, A0A0C4DFU1, Q5HYD9, O60568, Q02338, B4DHX0, B2R7U4, Q9HBH5, B2R983, P13073, O00391, Q8IUF8, A0A024R8L7, P07195, B3KXN9, Q9Y394, U3KQU8, A8K2R3, B4DMQ7, B4DHG3, O75828, Q53T76, Q13363, Q9UKU7, Q8TC12, R4GN43, Q5ZEY3, A0A024R301, P28331, Q9UI09, H0Y6H0, P52209, I3VM54, Q4G1C4, Q8N8N7, Q96HY7, K7ERC8, O60218, B4DRL9, I6L…	0.644435	0.856911	0.00273224
GO:0043170	macromolecule metabolic process	P	9	3384	17	6210	0.529412	0.544928	under	B4DXI2, K7ER90, A0A1B0GVI7, B4DUP5, Q16678, Q5JSB5, Q96AE4, Q4G148, Q53EY9	E9PJ81, B2RAH7, B2RAH5, B2RAH2, F5GZI3, H3BT57, B4DEA3, H0Y6I7, Q8N3U4, B4DMQ7, E7EMW7, A0A024R669, Q9H4L4, Q9H4L7, A0A024R5U7, O14561, H0Y6H0, B4DVD6, E9PIX7, S4R3H4, Q8NDV7, B3KY11, P0CJ79, B2RAI2, P62487, B2R8X4, P42858, Q8WXA9, A8K6Y1, Q9UKV5, B4DMT5, Q9UKV8, B4DMT1, A0A024R5X6, A0A087WZT0, Q5T6Z8, B7ZKY2, B4DVE4, Q8N442, Q9Y6A4, K7EKI4, F8WFB0, B4DMU7, A8MW49, C9JCN8, F5H2U8, B2RAK1, Q5BKZ1,…	0.646995	0.858244	0.00265957
GO:0051234	establishment of localization	P	5	1932	17	6210	0.294118	0.311111	under	Q9BYH2, Q5JSB5, G3V1D1, B7ZL14, Q05BX6	A8K2Q6, O75947, H0Y6I0, A0A0K2BMD8, B2RAH5, Q8NE86, B2RAH2, Q68E09, F5GZI3, B2R983, P13073, H3BT57, O00391, H3BST5, Q92973, K7EP07, B4DII5, E7EMW7, Q92974, A8K330, Q9H4L5, Q92968, Q9Y277, Q59EH0, B4DVD6, F8WB76, H7C5H6, Q8IWJ2, A0A024R1M8, E9PF10, P42858, Q99598, P61158, O15400, Q05BX6, Q96EB6, Q9Y282, P07602, A8K2S7, J3KRJ3, A0A024R5X6, B4DN54, E9PEQ6, Q12846, Q06124, Q5T6Z8, B7ZKY2, Q3KRG8, P61…	0.649257	0.858244	0.00258799
GO:0016023	cytoplasmic, membrane-bounded vesicle	C	1	371	17	6210	0.0588235	0.0597424	under	Q05BX6	Q5VYK3, A0A087WZA6, H3BLV0, B3KM89, F5H157, O14672, P18085, O75146, A0A0K2BMD8, A0A087X1N4, Q6QNY0, P61020, I3L412, K7ELY9, Q9H0U4, A4UCT0, H3BRR0, O00391, Q0JRZ9, O14662, P61026, P09496, P27348, P59190, P07996, P27487, A0A0C4DGE4, P49257, Q8NEX1, O75379, P12429, J3KQ45, B4DG67, D6RIZ4, Q9Y4L1, Q9Y2H2, J3QRU4, P42858, H0YNX7, Q96AJ9, O15400, Q05BX6, P10809, C9J1Z8, A8K103, H0YLF3, Q12965, Q8NEW0,…	0.649578	0.858244	0.00269542
GO:0022008	neurogenesis	P	1	373	17	6210	0.0588235	0.0600644	under	B4DUP5	P36507, F2Z2V0, Q14444, Q9UBB4, H0Y6I0, P18085, B5BTZ6, Q9NQU5, F2Z2E2, P52799, A0A0A0MTB8, A0MZ66, Q9H0U4, Q5JR08, J3QRV5, F5GZI3, F8VYH9, Q9NUM4, Q9BYG5, H3BST5, Q9BVA1, P61026, P43034, H0YN81, B4DPW9, P27348, P59190, Q96T04, Q16512, Q12834, Q12955, Q16513, A0A169TED2, Q53TG4, Q05048, O75131, C8C069, P58546, B4DE20, A0A087X208, Q5T0Q6, P51116, Q9Y2H2, J3QS66, H0YAN8, A8K3B6, B2R8X4, I3L425, Q9U…	0.651616	0.858244	0.00268097
GO:0044712	single-organism catabolic process	P	1	373	17	6210	0.0588235	0.0600644	under	Q16678	E9PJ81, B2ZGL7, B4DY91, A8MXV4, Q5VYK3, Q9H845, F8VYY9, B5MC79, P19174, Q86TM6, B4DIZ6, O60568, Q02338, A0A024RCR6, A4UCT0, B2R7U4, E9PPU6, P36871, Q9H7B4, B4E1G1, A0A024R8L7, P07195, B3KXN9, P43155, P43034, E9PB90, P08842, Q9Y3Z3, P24752, B4DHG3, B4DKM6, Q8TD30, D3DXC9, B3KT70, Q9UKU7, Q5ZEY3, S4R3X7, Q16512, B4DDQ8, P54868, Q6QN92, B4DG62, Q96HY7, O60218, P38117, Q9Y2H2, P30084, P30519, Q16762,…	0.651616	0.858244	0.00268097
GO:0044267	cellular protein metabolic process	P	5	1938	17	6210	0.294118	0.312077	under	K7ER90, B4DXI2, B4DUP5, Q4G148, Q53EY9	E9PJ81, A8K2Q6, Q0VGA5, B2RAH5, Q68E09, Q9HAF1, F5GZI3, H3BT57, H0Y6I7, B4DEA3, Q8N3U4, A8K2R3, Q92974, E7EMW7, Q9BQ69, Q9H4L4, D6RBL4, Q9H4L7, Q12834, H0Y6H0, O14561, B4DVD6, E9PIX7, C8C069, Q8NDV7, B2R514, Q96EB1, P42858, Q9H0C8, Q9Y285, O15405, Q96EB6, Q9UKV5, P10809, B4DMT5, P27694, Q9UKV8, A0A024R5X6, E9PEQ6, Q06124, Q5T6Z8, A0AVT1, B7ZKY2, Q8N442, B4DIK4, Q9Y6A4, K7EKI4, P26358, Q59EJ8, Q9B…	0.652452	0.858244	0.00257998
GO:0055086	nucleobase-containing small molecule metabolic process	P	1	379	17	6210	0.0588235	0.0610306	under	Q9UDW1	O75947, B4DY91, P37837, Q16864, F8VYY9, K9J7I2, Q9UEH5, P30085, A0A087WVZ9, O43678, P10599, Q8TCS8, B4DIZ6, Q9UDW1, A4UCT0, E7EVH9, P36871, P13073, P07195, Q9NTK5, P22695, E9PB90, Q9BSK2, B4DMQ7, Q9Y3Z3, P07996, Q9BQ69, D3DXC9, B3KT70, R4GN43, Q5ZEY3, S4R3X7, P28331, B4DDQ8, P48047, Q9UI09, O14561, P52209, O00154, J3KRW8, C9JFR7, B4DG62, B0AZR9, O60218, Q5T0Q6, O75380, P62487, Q6IA69, P22102, P47…	0.657662	0.863316	0.00263852
GO:2000113	negative regulation of cellular macromolecule biosynthetic process	P	1	381	17	6210	0.0588235	0.0613527	under	B4DXI2	Q9H7S9, Q96LA8, P36507, Q8N108, B5BTZ6, Q53SF4, Q9UBB5, Q53RD8, A5YKK6, H3BV98, H3BT57, E7ETD6, Q8N3U4, A8K2R3, P27348, B3KM81, Q13363, Q14451, C9J185, P38919, B7ZKK7, D6RBL4, Q15545, Q5ZEY3, P62805, H0YME5, H0YLC5, Q3SY98, Q53TG4, Q8NDV7, C8C069, B3KRT9, E7ES08, B2RAI2, P51116, E9PQX9, O75381, A0A0C4DFT3, H0UI99, Q9UI10, Q6NX55, A8K6Y1, B4DYZ9, Q15554, C9J7T7, J3QR41, Q96EB6, Q2MJK0, Q29RF7, Q9U…	0.659655	0.863316	0.00262467
GO:0051239	regulation of multicellular organismal process	P	2	795	17	6210	0.117647	0.128019	under	A0A1B0GVI7, Q16678	F2Z2V0, H0Y6I0, M0QZS0, B2RAH5, Q9BRZ2, B2RAH2, A0MZ66, Q5JR08, A0A0A0MTS5, B2R983, H3BT57, H0YN81, B2R6S9, B3KRB7, F2Z2U4, Q92974, A8K4T6, Q12834, Q5T123, S4R3H4, C8C069, F8WB76, E9PGT3, F8VZJ2, P51116, Q5T0Q6, B2R8X4, P14174, O15405, P67936, P10809, Q9Y281, Q96EB6, A8K103, Q9BRX8, A0A024R5X6, Q06124, H6TXS1, B7ZKY2, Q3KRG8, B3KVL0, C9JRJ5, B4DL06, P63104, P62258, B2R6U9, F8WFB0, Q59EJ8, Q59GN8,…	0.659837	0.863316	0.00251572
GO:0031324	negative regulation of cellular metabolic process	P	2	803	17	6210	0.117647	0.129308	under	B4DXI2, A0A1B0GVI7	E9PJ81, Q9BYG3, F5GZI3, H3BV98, H3BT57, E7ETD6, Q8N3U4, A8K2R3, B3KRB7, E7EMW7, A8K4T6, D6RBL4, Q12834, Q5VTR2, S4R3H4, C8C069, Q8NDV7, E9PGT3, B2RAI2, P51116, A0A0C4DFT3, Q6NX55, A8K6Y1, J3QR41, Q96EB6, A8K103, Q9UKV8, Q06124, H6TXS1, Q5T6Z8, C9JRJ5, B4DXI2, P40429, Q6IQ30, A8K2T5, P63104, B4DL06, P62258, P26358, Q59EJ8, A8MW49, F5H2U8, Q9NZI8, Q9C004, C9JCN8, P31946, A0A024R201, P31947, Q8NDT2,…	0.665552	0.869244	0.00249066
GO:0007049	cell cycle	P	2	807	17	6210	0.117647	0.129952	under	B4DXI2, Q5JSB5	Q9Y266, F5H157, B2RAH5, Q9NQU5, O00148, Q5JR08, H3BT57, E7ETD6, Q53S54, Q68E01, Q8N3U4, Q92974, A0A024R669, A8K4T6, Q9H4L7, Q12834, B4E0W3, Q5VTR2, E9PIX7, C8C069, E9PGT3, P16104, O60216, A0A0C4DFT3, P42858, P14174, A8K6Y1, P61158, J3QR41, Q96EB6, P27694, Q86SY9, A0A024RBR1, Q9NQW6, H6TXS1, Q6PJQ8, B4DXI2, P61160, A8K9A5, B4DL06, P63104, P62258, F5H2U8, P31946, A0A024R201, P31947, H3BMF1, P55735,…	0.668383	0.871391	0.00247831
GO:0043167	ion binding	F	2	819	17	6210	0.117647	0.131884	under	Q16678, G3V1D1	Q59GM9, A8K566, F2Z2V0, Q8NC42, A0A0K2BMD8, Q9BRZ2, A0A0C4DFU1, H3BT57, E7ETD6, O00151, H0Y6I7, B4DMQ7, Q9Y3Z3, Q92974, E7EMW7, A0A024R669, Q6IB91, O14561, Q5VTR2, E9PGT3, P0CJ79, B2RAI2, A0A087WXN4, Q9H0C8, B3KRC6, P67936, Q9UKV5, Q53RS5, B4DMT1, A0A024RBR1, H6TXS1, O95571, B3KVL0, C9JRJ5, B3KVL5, Q99584, B2R761, H0YJ25, A8K2T5, P63104, B4DIK4, P62258, B2R6U9, B2R769, A6NFI3, P26358, Q8TDB6, B2R…	0.676773	0.880765	0.002442
GO:1901363	heterocyclic compound binding	F	6	2364	17	6210	0.352941	0.380676	under	K7ER90, B4DXI2, A0A1B0GVI7, B4DUP5, Q16678, Q96AE4	A8K2Q6, Q0VGA5, O75940, A0A0K2BMD8, Q9BYG3, Q68E09, H3BST5, Q92973, B4DEA3, A8K2R3, B4DMQ7, A8K330, E7EMW7, Q9BQ69, A0A024R5U7, Q9H4L7, Q9UKU7, Q6IB91, Q59EH0, H0Y6H0, B4DVD6, S4R3H4, E9PIX7, Q8NDV7, H7C5H6, B3KY11, P0CJ79, B2RAI2, P16104, P62487, D3DPC4, B2R8X4, Q99598, Q8WXA9, A8K6Y1, Q9Y285, P61158, O15405, A6NHL2, P10809, Q96EB6, B4DMT5, P27694, Q9UKV8, Q86SY9, B4DMT1, A0A024R5X6, E9PEQ6, A0A…	0.680133	0.881727	0.00253807
GO:0044248	cellular catabolic process	P	2	824	17	6210	0.117647	0.132689	under	Q16678, Q53EY9	E9PJ81, A8MXV4, A0A0K2BMD8, H0YEF3, B2R983, H3BT57, A0A087WXM6, Q53S54, B3KXN9, B4DEA3, A0A075B784, Q9Y3Z3, B4DKM6, E7EMW7, A8K4T6, Q9UKU7, Q12834, O00154, B7Z4N7, Q5VTR2, P54868, Q6QN92, O60218, P38117, P62241, J3QR41, Q9UKV5, Q96EB6, A8K103, Q9UKV8, B4E0X0, A0AVT1, B2R761, P40429, Q6IQ30, B4DL06, Q59EJ8, Q9C005, Q92947, A8MW49, P08708, A0A024R201, P26373, Q08ES8, B3KY23, P62266, F8W7C6, P62263,…	0.680223	0.881727	0.00242718
GO:0051716	cellular response to stimulus	P	6	2366	17	6210	0.352941	0.380998	under	A0A1B0GVI7, B4DUP5, Q16678, Q5JSB5, B4DWS8, Q05BX6	E9PJ81, A8K2Q6, B2RAH5, Q8NE86, B2RAH2, A0MZ66, Q68E09, Q9HAF1, F5GZI3, B2R983, H3BT57, H3BST5, Q68E01, B4DEA3, A8K2R3, E7EMW7, Q92974, Q9BQ69, A0A024R669, B4DN44, Q92968, Q9H4L7, Q59EH0, K7EKE8, B4DVD6, S4R3H4, E9PIX7, Q8NDV7, C8C069, P54868, F8WB76, H7C5H6, B3KY11, P16104, B2R514, P62487, P42858, P61158, O15405, Q05BX6, Q96EB6, Q9UKV5, P10809, P07602, A8K2S7, P27694, Q9UKV8, Q86SY9, A0A024R5X6,…	0.681116	0.881727	0.00253593
GO:0002376	immune system process	P	2	830	17	6210	0.117647	0.133655	under	Q9BYH2, A0A1B0GVI7	F5H157, Q9NQU5, Q9BRZ2, Q5JR08, H3BV98, H3BT57, B4DEA3, H0YN81, B3KRB7, Q9Y3Z3, F2Z2U4, P27487, B4DL02, A8K4T7, A8K4T6, Q92968, K7EKE8, B4DVD6, S4R3H4, Q8NC33, P51116, B2R8X4, P14174, P61158, O15400, O15405, P10809, Q96EB6, A8K103, Q9BRX8, Q12846, Q06124, Q3KRG8, P61160, Q99584, P40429, Q9H0B6, B4DL06, B2R769, B2R6U9, A8MW49, Q59GN8, B2RAK1, P08708, A0A024R201, Q13707, P55735, S6FRS6, B2R8Z8, A0A…	0.684327	0.882481	0.00240964
GO:0097708	intracellular vesicle	C	1	410	17	6210	0.0588235	0.0660225	under	Q05BX6	B3KM89, F5H157, O14672, A0A0K2BMD8, Q6QNY0, P61020, Q5JR08, H3BRR0, O00391, Q0JRZ9, O14662, P61026, P27348, P59190, P07996, P27487, P49257, Q8NEX1, Q59EH0, D6RIZ4, J3QRU4, P42858, H0YNX7, O15400, Q05BX6, P10809, A8K103, Q12965, Q8NEW0, Q96NT0, Q12846, Q9BR76, A8KAQ3, A8KA01, Q5T0N5, O00291, B4DWG1, P27449, P63104, P62258, Q9UJU6, Q9UHQ9, P05556, B2RAK1, P31946, P31947, A0A024R684, Q6LEU0, P55735,…	0.68736	0.882481	0.00243902
GO:0031410	cytoplasmic vesicle	C	1	410	17	6210	0.0588235	0.0660225	under	Q05BX6	B3KM89, F5H157, O14672, A0A0K2BMD8, Q6QNY0, P61020, Q5JR08, H3BRR0, O00391, Q0JRZ9, O14662, P61026, P27348, P59190, P07996, P27487, P49257, Q8NEX1, Q59EH0, D6RIZ4, J3QRU4, P42858, H0YNX7, O15400, Q05BX6, P10809, A8K103, Q12965, Q8NEW0, Q96NT0, Q12846, Q9BR76, A8KAQ3, A8KA01, Q5T0N5, O00291, B4DWG1, P27449, P63104, P62258, Q9UJU6, Q9UHQ9, P05556, B2RAK1, P31946, P31947, A0A024R684, Q6LEU0, P55735,…	0.68736	0.882481	0.00243902
GO:0044432	endoplasmic reticulum part	C	1	410	17	6210	0.0588235	0.0660225	under	Q16678	E9PJ81, D6RF48, A0A024R3R5, B3KM89, O14672, Q5VV42, Q9NRW5, O60568, A7BI36, B2R7U4, Q5JR08, Q9HBH5, P60059, P61026, P08842, P59190, B4DHG3, P07996, Q9H4L5, Q92604, P49257, Q9NRX5, P37268, E7EM50, P30519, Q8N4V1, B3KRC6, Q6Y1H2, Q9UKV5, Q6NUM7, J3KNB5, A0A024RCT1, P16435, A0A0B4J206, B2R7W7, A8MU21, A0A090N8P3, B2R769, Q9UHQ9, O75911, C9JBL1, Q9BSY0, F8WAX7, P55735, Q9BZF1, A8YQF4, F6WST4, O14579,…	0.68736	0.882481	0.00243902
GO:0048468	cell development	P	1	412	17	6210	0.0588235	0.0663446	under	B4DUP5	F2Z2V0, Q9UBB4, F5H157, H0Y6I0, B2RAH5, P52799, A0MZ66, Q562L9, Q5JR08, F5GZI3, A0A0A0MTS5, Q9BYG5, F8VYH9, Q9BVA1, P61026, B3KRB7, P27348, P59190, Q92974, Q12834, Q12955, K7EKE8, P08727, C8C069, Q5T0Q6, P51116, Q9UI10, P67936, Q9Y281, Q13813, A0A024RB10, C9JG41, Q06124, Q9BR76, C9JRJ5, A0A024RDV5, B3KUJ5, Q9UJU1, O14686, P63104, B4DL06, Q9UJU6, B2R6U9, A0A0A0MR09, F8WFB0, P05556, B7Z952, Q59GN8,…	0.68919	0.882481	0.00242718
GO:0010605	negative regulation of macromolecule metabolic process	P	2	840	17	6210	0.117647	0.135266	under	B4DXI2, A0A1B0GVI7	E9PJ81, F2Z2V0, Q8TDD1, F5GZI3, H3BV98, H3BT57, E7ETD6, Q8N3U4, A8K2R3, B3KRB7, E7EMW7, Q9BQ69, A8K4T6, D6RBL4, Q12834, Q5VTR2, S4R3H4, C8C069, Q8NDV7, E9PGT3, B2RAI2, E9PGT1, P51116, P62487, A0A0C4DFT3, Q99598, P14174, Q6NX55, A8K6Y1, J3QR41, Q96EB6, A8K2S7, A8K103, Q9UKV8, Q06124, H6TXS1, Q5T6Z8, C9JRJ5, B4DXI2, P40429, Q6IQ30, A8K2T5, P63104, B4DL06, P62258, P26358, Q59EJ8, A8MW49, F5H2U8, Q9N…	0.69108	0.882481	0.00238095
GO:0007005	mitochondrion organization	P	1	415	17	6210	0.0588235	0.0668277	under	Q5JSB5	Q9H845, Q9UEH5, B2RBJ8, Q8IXM3, Q96HI4, H3BST5, A0A075B784, P27348, B3KM81, B4DHG3, A8K330, A8K4T7, Q92968, R4GN43, O95202, P28331, Q9UI09, Q9NQ50, Q9NRX2, B9A067, O14561, Q9Y399, B4DVD6, S4R3H4, C9JFR7, J3QLI9, Q659C4, A0A140TA28, B2R8X4, J3KRJ3, A0A024R5X6, B4DN54, E9PEQ6, O60783, P63104, P62258, K7EKI4, Q9Y2Z4, Q6FHK1, Q9UHQ9, Q9BQ48, A8MW49, Q9UBE0, P31946, K7EJE8, P31947, E9PE17, Q9BYD2, B2R…	0.691916	0.882481	0.00240964
GO:0097159	organic cyclic compound binding	F	6	2390	17	6210	0.352941	0.384863	under	K7ER90, B4DXI2, A0A1B0GVI7, B4DUP5, Q16678, Q96AE4	A8K2Q6, Q0VGA5, O75940, A0A0K2BMD8, Q9BYG3, Q68E09, H3BST5, Q92973, B4DEA3, A8K2R3, B4DMQ7, A8K330, E7EMW7, Q9H4L5, Q9BQ69, A0A024R5U7, Q9H4L7, Q9UKU7, Q6IB91, Q59EH0, H0Y6H0, B4DVD6, S4R3H4, E9PIX7, Q8NDV7, H7C5H6, B3KY11, P0CJ79, B2RAI2, P16104, P62487, D3DPC4, B2R8X4, Q99598, Q8WXA9, A8K6Y1, Q9Y285, P61158, O15405, A6NHL2, P10809, Q96EB6, B4DMT5, P27694, Q9UKV8, Q86SY9, B4DMT1, A0A024R5X6, E9P…	0.692797	0.882481	0.00251046
GO:0070647	protein modification by small protein conjugation or removal	P	1	417	17	6210	0.0588235	0.0671498	under	Q53EY9	E9PJ81, Q9ULV8, Q8NC42, Q9BRZ2, A0A0A0MSQ3, O60566, P15374, H3BT57, Q9UK41, Q53S54, Q9Y2X3, Q8N3U4, A0A075B784, A8K2R3, B3KM81, F2Z2U4, E7EMW7, F2Z363, A8K4T6, Q9H4L4, Q12834, Q8NEX1, B7Z4N7, Q5VTR2, E9PGT6, O60216, B2R514, J3QR41, Q9UKV5, Q96EB6, B4DMT5, Q12962, A8K103, P27694, A0A024RAP0, Q9P0P0, A0A024RB10, H6TXS1, A0A0B4J206, A0AVT1, K7ES89, P40306, G3XAG7, P61289, B4DL06, Q8TDB6, Q59GN8, Q9U…	0.693721	0.882481	0.00239808
GO:0009719	response to endogenous stimulus	P	1	417	17	6210	0.0588235	0.0671498	under	A0A1B0GVI7	Q9H7S9, M0QZS0, A5YKK6, B2RAH2, Q8TDD1, Q5JR08, B2R7U4, F5GZI3, H0YFI1, P27348, P07996, Q92974, E7EMW7, B4DL02, P54868, C8C069, E9PGT3, O60218, P62487, P63218, Q92841, Q6NX55, Q96EB6, A8K103, A0A024RB10, Q06124, Q9BR76, A8KAQ3, H6TXS1, P16435, B3KVL0, B3KUJ5, Q9UJU1, P27449, O14686, B4DL06, P63104, A0A0A0MSS8, P26358, P05556, Q59GN8, P31943, C9JCN8, P31946, P31947, B3KVN0, Q96GD0, Q9BZF1, F5CTF4,…	0.693721	0.882481	0.00239808
GO:0006725	cellular aromatic compound metabolic process	P	6	2402	17	6210	0.352941	0.386795	under	Q9UDW1, B4DXI2, A0A1B0GVI7, Q16678, Q5JSB5, Q96AE4	A8K2Q6, Q0VGA5, O75947, O75940, B2RAH5, B2RAH2, Q9BYG3, Q68E09, E7EVH9, P13073, H3BT57, Q68E01, B4DEA3, Q8N3U4, A8K2R3, B4DMQ7, Q92974, E7EMW7, B2R506, B4DII5, A8K330, A0A024R669, Q9BQ69, Q9H4L4, A0A024R5U7, Q9H4L7, D6RBL4, O75934, O14561, H0Y6H0, P52209, B4DVD6, S4R3H4, C8C069, B3KY11, P0CJ79, B2RAI2, P16104, B2R514, P62487, Q96EB1, B2R8X4, Q8WXA9, A8K6Y1, Q9Y285, A0A0A8K8C0, O15405, Q96EB6, P10…	0.698556	0.885758	0.00249792
GO:0003723	RNA binding	F	3	1258	17	6210	0.176471	0.202576	under	K7ER90, B4DUP5, Q96AE4	P05204, Q0VGA5, A8K566, A0A024R3R5, O75940, Q9BRZ2, A0A0C4DG62, O00148, Q9BYG3, Q8TDD1, H3BV98, A0A087WXM6, Q92973, B3KRB2, Q9UMY1, A0A075B784, A8K2R3, Q9Y3Z3, A8K330, E7EMW7, A0A024R5U7, B9A067, Q5VTR2, B4DVD6, Q05048, S4R3H4, Q8NDV7, B3KY11, P51116, Q659C4, P62487, D3DPC4, Q99598, Q8WXA9, P62241, A2A2V2, Q2VIN3, A8K6Y1, Q9Y285, A6NHL2, P10809, B4DMT5, B4E0X8, B4DL14, Q9UKV8, A8K4W7, F5H136, E9P…	0.699887	0.885758	0.00238474
GO:0044260	cellular macromolecule metabolic process	P	8	3135	17	6210	0.470588	0.504831	under	B4DXI2, K7ER90, A0A1B0GVI7, B4DUP5, Q5JSB5, Q96AE4, Q4G148, Q53EY9	E9PJ81, B2RAH5, B2RAH2, F5GZI3, H3BT57, B4DEA3, H0Y6I7, Q8N3U4, B4DMQ7, E7EMW7, A0A024R669, Q9H4L4, A0A024R5U7, Q9H4L7, O14561, H0Y6H0, B4DVD6, E9PIX7, S4R3H4, Q8NDV7, B3KY11, P0CJ79, B2RAI2, P62487, B2R8X4, P42858, Q8WXA9, A8K6Y1, Q9UKV5, B4DMT5, Q9UKV8, B4DMT1, A0A024R5X6, A0A087WZT0, Q5T6Z8, B7ZKY2, B4DVE4, Q8N442, Q9Y6A4, K7EKI4, F8WFB0, A8MW49, C9JCN8, F5H2U8, B2RAK1, Q5BKZ1, Q8NDT2, B3KY23,…	0.699918	0.885758	0.00255183
GO:0035556	intracellular signal transduction	P	2	862	17	6210	0.117647	0.138808	under	Q5JSB5, B4DWS8	F2Z2V0, F5H157, M0QZS0, Q9NQU5, Q8NE86, B2RAH2, A0MZ66, Q68E09, Q9HAF1, Q5JR08, B2R983, H3BT57, H3BST5, Q53S54, B4DGE7, B3KRB7, A8K2R3, A1A4S6, Q92974, B4DL02, A8K4T6, B4E0W3, Q59EH0, H3BMH3, C8C069, F8WB76, B2RCM6, Q8NDV7, A0A0C4DFT3, P42858, P14174, Q6NX55, O15405, J3QR41, Q96EB6, A8K103, P27694, Q9UKV8, Q06124, H6TXS1, C9JRJ5, Q99584, P62258, P26358, Q59EJ8, Q59GN8, Q9C004, P31946, A0A024R201,…	0.70556	0.890487	0.00232019
GO:0006974	cellular response to DNA damage stimulus	P	1	431	17	6210	0.0588235	0.0694042	under	Q5JSB5	Q7L9B9, A5YKK6, O00148, A0A024RCR6, H3BT57, Q68E01, Q53S54, B4DEA3, P49137, A8K2R3, P27348, F2Z2U4, E7EMW7, Q75MM6, A0A024R669, Q9BQ69, Q9H4L7, I3VM54, E9PGT3, P16104, A0A024R307, B2R514, O60216, B1APR7, P62487, P14174, A0A0C4DGV9, Q96EB6, A8K3S0, P27694, Q86SY9, A8MX75, Q9NYF8, Q59FM7, A0A024RAP0, A0A024RB10, B4E0X0, H6TXS1, B4DYK6, B4DUC2, Q9P119, P18858, G3XAG7, P63104, B7Z9U0, Q8TDB6, Q59EJ8,…	0.706081	0.890487	0.00232019
GO:0040011	locomotion	P	1	435	17	6210	0.0588235	0.0700483	under	Q9BYH2	O14672, Q5VV41, P52799, B2RAH2, A0MZ66, B2R7U4, Q5JR08, A0A0A0MTS5, H3BT57, Q9BYG5, Q9BVA1, H3BST5, O15511, Q53S54, P61026, B4DPW9, P07996, B4DL02, P27487, Q92968, P08727, Q5T123, Q5JVZ8, Q5VTR2, Q96PY5, C8C069, Q5T0Q6, A0A024R0K5, B2R8X4, P14174, P67936, Q9H2G2, A8K103, A0A024R4V8, Q13813, Q06124, Q12846, Q9NQW6, B2RBL9, Q9BR76, Q3KRG8, Q9P119, C9JRJ5, Q9UJU1, B4DL06, Q9Y6A4, B2R6U9, B7Z952, P05…	0.709525	0.892549	0.00229885
GO:0008152	metabolic process	P	11	4211	17	6210	0.647059	0.6781	under	Q9UDW1, B4DXI2, K7ER90, B4DUP5, A0A1B0GVI7, Q16678, Q5JSB5, Q96AE4, Q4G148, G3V1D1, Q53EY9	E9PJ81, B2RAH7, A0A0K2BMD8, B2RAH5, B2RAH2, E7EVH9, F5GZI3, B2R983, H3BT57, B2R8W4, B3KXN9, B4DEA3, H0Y6I7, Q8N3U4, B4DMQ7, E7EMW7, A0A024R669, Q9H4L4, Q9H4L7, A0A024R5U7, Q9UKU7, Q6IB91, O14561, H0Y6H0, P52209, B4DVD6, E9PIX7, S4R3H4, P54868, Q8NDV7, B3KY11, P0CJ79, B2RAI2, P19623, Q96IJ6, P62487, B2R8X4, D3DPC4, P42858, Q8WXA9, A8K6Y1, Q9UKV5, P07602, B4DMT5, Q9UKV8, B4DMT1, A0A024R5X6, A0A087W…	0.710483	0.892549	0.00261221	RefSeqs: F5H225, A8K1J3, Q08J23, A0AV47, A0A120HF56, B4DXL9, Q59G74, A0A0D9SFB3, Q8N0Z8, B5MCK8, Q6P2Q9, Q8WUH2, B7Z532, B5BU16, Q5TEC6, B2RD36, A8MYV4, E9PID8, A0JP11, Q14789, Q7RTP6, P19474, F6SDV2, A0A0C4DG44, O60344, Q6FG43, Q9BZS5, Q9HC36, B7ZW30, E5RFK7, B7Z4P1, B4DGM5, Q8WUF5, Q9P0U0, B4DGM3, Q96G03, H7BZ18, F8WDR2, A0A087WUN5, A0A024R6E3, Q9HBQ7, Q7L9L4, E9PIF4, Q13472, A8K2Q6, Q0VGA5, O7…
GO:0019538	protein metabolic process	P	5	2062	17	6210	0.294118	0.332045	under	K7ER90, B4DXI2, B4DUP5, Q4G148, Q53EY9	E9PJ81, A8K2Q6, Q0VGA5, B2RAH7, B2RAH5, Q68E09, Q9HAF1, F5GZI3, H3BT57, H0Y6I7, B4DEA3, Q8N3U4, A8K2R3, E7EMW7, Q92974, Q9BQ69, Q9H4L4, D6RBL4, Q9H4L7, Q12834, O14561, H0Y6H0, B4DVD6, E9PIX7, C8C069, Q8NDV7, B2R514, Q96EB1, P42858, Q9H0C8, Q9Y285, O15405, Q96EB6, Q9UKV5, P10809, B4DMT5, A8K2S7, P27694, Q9UKV8, A0A024R5X6, E9PEQ6, Q06124, Q5T6Z8, B7ZKY2, A0AVT1, Q8N442, B4DIK4, Q9Y6A4, K7EKI4, P26…	0.715109	0.892549	0.00242483
GO:0070887	cellular response to chemical stimulus	P	2	878	17	6210	0.117647	0.141385	under	A0A1B0GVI7, Q16678	F2Z2V0, F5H157, M0QZS0, B2RAH2, Q8TDD1, Q5JR08, F5GZI3, B2R983, H3BV98, H3BT57, E7ETD6, P60059, B3KRB7, Q9Y3Z3, E7EMW7, Q92974, B4DL02, A8K4T6, P54868, C8C069, E9PGT3, O60218, P62487, Q2VIN3, Q6NX55, P67936, Q96EB6, Q9UKV5, A8K103, Q9UKV8, E9PEQ6, Q06124, Q12846, A8KAQ3, H6TXS1, B7ZKY2, B3KVL0, P40429, P27449, B4DL06, P63104, P26358, Q59EJ8, Q59GN8, A8MW49, F5H2U8, P31943, C9JCN8, P31946, A0A024R…	0.715767	0.892549	0.0022779
GO:0005654	nucleoplasm	C	4	1686	17	6210	0.235294	0.271498	under	B4DXI2, A0A1B0GVI7, Q5JSB5, Q96AE4	O75947, Q9Y266, O75940, H0Y6I0, B2RAH5, B2RAH2, Q9BYG3, Q68E09, Q9HAF1, H3BT57, Q68E01, H0Y6I7, B4DEA3, Q8N3U4, A8K2R3, K7EP07, B2R506, B4DII5, A8K330, E7EMW7, A0A024R669, Q9H4L4, D6RBL4, A0A024R5U7, Q9H4L7, O75934, Q12834, H0Y6H0, B4DVD6, S4R3H4, Q8NDV7, B3KY11, B2RAI2, P16104, B2R514, Q96EB1, P62487, B2R8X4, P42858, Q8WXA9, A8K6Y1, Q96EB6, O75937, Q9NXD3, P27694, Q9UKV8, Q86SY9, B4DMT1, A0A024R…	0.718723	0.892549	0.00237248
GO:0019637	organophosphate metabolic process	P	1	446	17	6210	0.0588235	0.0718196	under	Q9UDW1	O75947, F2Z2V0, Q9UEH5, P13073, B4DMQ7, Q9Y3Z3, P07996, Q53T76, Q92604, R4GN43, P28331, P48047, Q9UI09, O14561, P52209, O00154, Q9NRX5, C9JFR7, O60218, E7EM50, Q659C5, Q6IA69, P49247, B3KM95, Q8N335, Q6NUM7, O95336, B4DL14, Q9H7Q4, H0YHN9, P18859, B2R761, A8K9A5, P27449, B4DHI5, Q59GN8, D6RCP9, Q9NQX3, A0A0S2Z523, H3BNH2, Q9BSY0, A0A087WYS1, Q8ND26, B5LY71, Q53SW4, A8K2S1, O95479, A0A024R5Z9, A0A…	0.718801	0.892549	0.00224215
GO:0043085	positive regulation of catalytic activity	P	1	448	17	6210	0.0588235	0.0721417	under	G3V1D1	Q5VV41, B2RAH5, Q9NQU5, Q68E09, Q5JR08, O60566, Q8NB16, P49137, Q9ULW0, P27348, B3KM81, P07996, B4DL02, A8K4T6, Q12834, Q59EH0, Q5T123, Q9NRX5, C8C069, C9JFR7, J3QS66, J3QR41, Q96EB6, P10809, A8K3S0, Q9UK58, F5H136, B4DJN0, A0A024RAP0, Q12846, P16435, Q9Y2Z0, O00291, P40306, P61289, P63104, Q9UJU6, F8WFB0, P05556, Q59GN8, P31946, P07737, A0A024R201, Q99460, Q7L576, A0A0C4DGX4, B3KX06, Q96LN2, K7E…	0.720458	0.892549	0.00223214
GO:0006629	lipid metabolic process	P	1	453	17	6210	0.0588235	0.0729469	under	Q16678	A0A024R3R5, F2Z2V0, B4DUA6, A8MXV4, Q9H845, Q9NRW5, Q5HYD9, Q9HBH5, H0YFI1, B4DJK7, Q9Y394, P49137, P08842, B4DMQ7, O75828, Q53T76, Q92604, Q9UKU7, J3KSI4, O14561, O00154, Q9NRX5, P54868, C8C069, P37268, A0A024R1M8, O60218, P38117, E7EM50, Q659C5, P14174, B3KRC6, C9J7T7, Q6Y1H2, B3KM95, Q96EB6, B2R758, Q8N335, Q6NUM7, P07602, Q9Y2Y8, H0YHN9, Q08426, Q06124, H6TXS1, B2R7W7, B2R761, Q86WA8, P63104,…	0.724559	0.892549	0.00220751
GO:0048731	system development	P	3	1303	17	6210	0.176471	0.209823	under	B4DUP5, A0A1B0GVI7, Q16678	F2Z2V0, F5H157, H0Y6I0, Q9UEH5, Q9NQU5, A0MZ66, B2RAH2, Q5JR08, F5GZI3, A0A0A0MTS5, H3BT57, E7ETD6, Q9BYG5, H3BST5, Q53S54, H0Y6I7, H0YN81, F2Z2U4, Q92974, B4DL02, A8K4T7, A8K4T6, Q9H4L7, Q92968, Q12834, B4E0W3, Q59EH0, P08727, S4R3H4, Q05048, C8C069, P54868, E9PGT3, F8VZJ2, B2RAI2, Q5T0Q6, P51116, B1APR7, A0A0C4DFT3, B2R8X4, P42858, O15405, P67936, Q9Y281, Q96EB6, P10809, P07602, Q9H2G2, Q9BRX8,…	0.724688	0.892549	0.00230238
GO:0033365	protein localization to organelle	P	1	454	17	6210	0.0588235	0.0731079	under	Q5JSB5	F5H157, H0Y6I0, P67809, B2RAH2, Q96HI4, B4DYI0, A0A024RCR6, O60566, H3BT57, H9KV93, A0A087WXM6, Q96JM3, Q92973, P61026, A0A075B784, P27348, P59190, A8K330, E7EMW7, B4DII5, Q92968, Q12955, H7C5H6, Q8IWJ2, O60216, A0A140TA28, P62241, J3QR41, Q96EB6, J3KRJ3, A8K2S7, Q9H5M4, P25398, A0A024R4V8, F5H136, B4DN54, B4DM33, A0A087WYR0, Q96P70, Q9P119, P40429, Q86WA8, Q9UJU1, P63104, B4DL06, P62258, A0A0A0M…	0.725372	0.892549	0.00220264
GO:0016070	RNA metabolic process	P	4	1700	17	6210	0.235294	0.273752	under	B4DXI2, A0A1B0GVI7, Q5JSB5, Q96AE4	Q0VGA5, O75940, B2RAH5, B2RAH2, Q68E09, Q9BYG3, H3BT57, Q68E01, A8K2R3, A8K330, Q92974, B2R506, A0A024R669, Q9H4L4, A0A024R5U7, Q9H4L7, D6RBL4, O75934, H0Y6H0, B4DVD6, S4R3H4, C8C069, B3KY11, P0CJ79, B2RAI2, Q96EB1, P62487, B2R8X4, Q8WXA9, A8K6Y1, A0A0A8K8C0, Q9Y285, O15405, Q96EB6, O75937, Q9UKV8, B4DMT1, A0A024R5X6, A0A087WZT0, B4DVE4, Q9Y295, Q6MZZ4, A8K2T5, P26358, F8WFB0, Q59EJ8, C9JCN8, F5H…	0.725665	0.892549	0.00235294
GO:0042221	response to chemical	P	3	1305	17	6210	0.176471	0.210145	under	Q9BYH2, A0A1B0GVI7, Q16678	E9PJ81, F2Z2V0, F5H157, M0QZS0, A0A0K2BMD8, Q9BRZ2, A0A0C4DFU1, B2RAH2, Q8TDD1, Q5JR08, F5GZI3, B2R983, H3BV98, E7ETD6, H3BT57, P60059, B3KRB7, Q9Y3Z3, B4DKM6, Q92974, E7EMW7, B4DL02, A8K4T6, P54868, C8C069, E9PGT3, O60218, Q5T0Q6, P62487, B2R8X4, Q2VIN3, Q6NX55, P67936, Q9UKV5, Q96EB6, P10809, A8K2S7, A8K103, Q9UKV8, J3KNB5, E9PEQ6, Q06124, Q12846, A8KAQ3, H6TXS1, B7ZKY2, B3KVL0, Q99584, P40429,…	0.725757	0.892549	0.00229885
GO:0044238	primary metabolic process	P	10	3899	17	6210	0.588235	0.627858	under	Q9UDW1, B4DXI2, K7ER90, A0A1B0GVI7, B4DUP5, Q16678, Q5JSB5, Q96AE4, Q4G148, Q53EY9	E9PJ81, B2RAH7, B2RAH5, B2RAH2, E7EVH9, F5GZI3, H3BT57, B2R8W4, B4DEA3, H0Y6I7, Q8N3U4, B4DMQ7, E7EMW7, A0A024R669, Q9H4L4, Q9H4L7, A0A024R5U7, Q9UKU7, Q6IB91, O14561, H0Y6H0, P52209, B4DVD6, E9PIX7, S4R3H4, Q8NDV7, P54868, B3KY11, P0CJ79, B2RAI2, P19623, P62487, B2R8X4, P42858, Q8WXA9, A8K6Y1, Q9UKV5, P07602, B4DMT5, Q9UKV8, B4DMT1, A0A024R5X6, A0A087WZT0, Q5T6Z8, B7ZKY2, B4DVE4, Q3KRG8, Q8N442,…	0.726406	0.892549	0.00256476
GO:0016032	viral process	P	1	459	17	6210	0.0588235	0.073913	under	K7ER90	A8K2Q6, Q9BRZ2, O00148, Q562L9, B3KUH0, H3BV98, H3BT57, A0A087WXM6, Q9UK41, B3KRB7, Q9Y3Z3, B4DII5, Q9H2H8, A8K4T7, Q92968, K7EKE8, Q9Y399, B4DVD6, S4R3H4, E9PF10, P51116, J3QLI9, P62487, A0A0C4DGV9, P62241, Q6NX55, Q9Y281, B4DMT5, P25398, A0A024RAP0, E9PEQ6, P18615, B3KUJ5, P40429, A0A024R341, B4DHI5, A0A024R326, A8MW49, F5H2U8, B4DNW3, P08708, P26373, Q08ES8, Q13707, P18754, P62266, A0A024RBQ5,…	0.729405	0.892549	0.00217865
GO:0044802	single-organism membrane organization	P	1	461	17	6210	0.0588235	0.0742351	under	Q5JSB5	D6RF48, F5H157, H0Y6I0, Q5VV41, Q96HI4, A0A024RCR6, B3KUH0, F5GZI3, A0A087WXM6, H3BST5, O14662, Q0JRZ9, P61026, P27348, B3KRB7, P59190, O95202, Q12955, B9A067, F8WB76, Q8IWJ2, E9PF10, J3QRU4, A0A0C4DFT3, P62241, A0A087WXN9, O15400, Q9ULX6, P50395, P25398, B4DN54, E9PEQ6, Q12846, A0A087WYR0, Q5T0N5, Q5T6Z8, B2R761, P40429, Q9UJU1, P63104, P62258, P05556, A0A024R326, P31946, P08708, P26373, Q08ES8,…	0.731003	0.892549	0.0021692
GO:0044764	multi-organism cellular process	P	1	461	17	6210	0.0588235	0.0742351	under	K7ER90	A8K2Q6, Q9BRZ2, O00148, Q562L9, B3KUH0, H3BV98, H3BT57, A0A087WXM6, Q9UK41, B3KRB7, Q9Y3Z3, B4DII5, Q9H2H8, A8K4T7, Q92968, K7EKE8, Q9Y399, B4DVD6, S4R3H4, E9PF10, P51116, J3QLI9, P62487, A0A0C4DGV9, P62241, Q6NX55, Q9Y281, B4DMT5, P25398, A0A024RAP0, E9PEQ6, P18615, B3KUJ5, P40429, A0A024R341, B4DHI5, A0A024R326, A8MW49, F5H2U8, B4DNW3, P08708, P26373, Q08ES8, Q13707, P18754, P62266, A0A024RBQ5,…	0.731003	0.892549	0.0021692
GO:1901360	organic cyclic compound metabolic process	P	6	2474	17	6210	0.352941	0.39839	under	Q9UDW1, B4DXI2, A0A1B0GVI7, Q16678, Q5JSB5, Q96AE4	A8K2Q6, Q0VGA5, O75947, O75940, B2RAH5, B2RAH2, Q9BYG3, Q68E09, E7EVH9, P13073, H3BT57, Q68E01, B4DEA3, Q8N3U4, A8K2R3, B4DMQ7, Q92974, E7EMW7, B2R506, B4DII5, A8K330, A0A024R669, Q9BQ69, Q9H4L4, A0A024R5U7, Q9H4L7, D6RBL4, O75934, O14561, H0Y6H0, P52209, B4DVD6, S4R3H4, C8C069, P54868, A0A024R1M8, B3KY11, P0CJ79, B2RAI2, P16104, B2R514, P62487, Q96EB1, B2R8X4, Q8WXA9, A8K6Y1, Q9Y285, A0A0A8K8C0,…	0.731914	0.892549	0.00242522
GO:0009888	tissue development	P	1	465	17	6210	0.0588235	0.0748792	under	Q16678	Q9H7S9, Q9UEH5, O95678, B2RAH5, Q9NQU5, O60568, Q562L9, Q5JR08, A0A0A0MTS5, F5GZI3, E7ETD6, F8VYH9, H0Y6I7, P61026, B4DPW9, P08842, B3KRB7, B4DHG3, A8K4T6, P08729, Q9Y277, P08727, C8C069, F8VZJ2, B1APR7, A0A0C4DFT3, Q92841, P67936, P05787, A8MX75, B4E074, H0YHN9, Q9BR76, Q3KRG8, A0A024RDV5, B3KUJ5, Q9UJU1, P40306, B1ALI9, P61289, B4DL06, A0A0A0MSS8, B2R6U9, F8WFB0, P31942, P05556, F5H2U8, P07737,…	0.734171	0.892549	0.00215054
GO:0042592	homeostatic process	P	1	469	17	6210	0.0588235	0.0755233	under	G3V1D1	Q59GM9, H0YDD9, Q9H845, B7Z4M5, Q8NE86, B2RAH2, Q562L9, B2R7U4, B2R983, O00391, H3BT57, F8VYH9, H3BST5, H0YFI1, Q9UKU7, Q12955, S4R3H4, F8WB76, P42858, P30519, Q9H1E5, J3QR41, Q96EB6, Q8N335, A8K3S0, P27694, Q86SY9, F5H136, A8MX75, Q8NEW0, B4DLR3, Q12846, P18858, P27449, A0A0A0MSS8, Q92947, O15551, Q86SX6, P08708, Q13707, B3KX11, F5CTF4, P62263, K7EPR5, Q562M3, Q96JJ7, B7Z8Q4, H7C5K2, A0A0S2Z4V1,…	0.737304	0.892549	0.0021322
GO:0007165	signal transduction	P	4	1728	17	6210	0.235294	0.278261	under	A0A1B0GVI7, Q5JSB5, B4DWS8, Q05BX6	B2RAH5, Q8NE86, B2RAH2, A0MZ66, Q68E09, Q9HAF1, F5GZI3, B2R983, H3BT57, H3BST5, B4DEA3, A8K2R3, Q92974, E7EMW7, B4DN44, Q59EH0, K7EKE8, Q8NDV7, C8C069, F8WB76, H7C5H6, P62487, P42858, P61158, O15405, Q05BX6, Q96EB6, Q9UKV5, P10809, P27694, Q9UKV8, E9PEQ6, Q06124, Q12846, B7ZKY2, Q3KRG8, P61160, Q99584, P26358, Q59EJ8, C9JCN8, A0A024R201, A0A024R684, Q13707, F8WAX7, P55735, A0A024RBQ5, A8YQF4, A5Y…	0.739224	0.892549	0.00231481
GO:0044419	interspecies interaction between organisms	P	1	472	17	6210	0.0588235	0.0760064	under	K7ER90	A8K2Q6, Q9BRZ2, O00148, Q562L9, B3KUH0, H3BV98, H3BT57, A0A087WXM6, Q9UK41, B3KRB7, Q9Y3Z3, B4DII5, Q9H2H8, A8K4T7, Q92968, K7EKE8, Q9Y399, B4DVD6, S4R3H4, E9PF10, J3QLI9, P51116, P62487, A0A0C4DGV9, P62241, Q6NX55, Q9Y281, B4DMT5, P25398, A0A024RAP0, E9PEQ6, Q9Y2Z0, P18615, B3KUJ5, P40429, A0A024R341, B4DHI5, A0A024R326, A8MW49, F5H2U8, B4DNW3, P08708, P26373, Q08ES8, Q13707, P18754, P62266, A0A…	0.739632	0.892549	0.00211864
GO:0044403	symbiosis, encompassing mutualism through parasitism	P	1	472	17	6210	0.0588235	0.0760064	under	K7ER90	A8K2Q6, Q9BRZ2, O00148, Q562L9, B3KUH0, H3BV98, H3BT57, A0A087WXM6, Q9UK41, B3KRB7, Q9Y3Z3, B4DII5, Q9H2H8, A8K4T7, Q92968, K7EKE8, Q9Y399, B4DVD6, S4R3H4, E9PF10, J3QLI9, P51116, P62487, A0A0C4DGV9, P62241, Q6NX55, Q9Y281, B4DMT5, P25398, A0A024RAP0, E9PEQ6, Q9Y2Z0, P18615, B3KUJ5, P40429, A0A024R341, B4DHI5, A0A024R326, A8MW49, F5H2U8, B4DNW3, P08708, P26373, Q08ES8, Q13707, P18754, P62266, A0A…	0.739632	0.892549	0.00211864
GO:0009967	positive regulation of signal transduction	P	1	473	17	6210	0.0588235	0.0761675	under	Q5JSB5	F2Z2V0, A0A024R798, Q8N108, Q9NQU5, B2RAH2, Q96HI4, Q68E09, Q8NB16, B2R7U4, Q5JR08, B2R983, H3BT57, H0YFI1, B4DGE7, P49137, P27348, B3KRB7, P07996, E7EMW7, B4DL02, A8K4T6, H3BMH3, C8C069, P14174, P42858, Q92841, O15405, Q96EB6, Q9H2G2, Q9H5M4, A8K103, Q9NYF8, Q06124, A8KA01, Q99584, B3KUJ5, P40306, P27449, P61289, O14686, P63104, P62258, A0A0A0MSS8, Q9UJU6, B2R6U9, Q59GN8, P31946, A0A024R201, P31…	0.740403	0.892549	0.00211416
GO:0010629	negative regulation of gene expression	P	1	473	17	6210	0.0588235	0.0761675	under	B4DXI2	Q9H7S9, B4E299, Q8N108, F2Z2V0, Q9UBB5, A5YKK6, H3BV98, E7ETD6, H3BT57, A8K2R3, P27348, B3KM81, P07996, D6RBL4, Q3SY98, Q5VTR2, S4R3H4, C8C069, Q8NDV7, B2RAI2, E9PGT1, P51116, P62487, A0A0C4DFT3, Q99598, H0UI99, P14174, Q9UI10, Q92841, Q6NX55, A8K6Y1, C9J7T7, J3QR41, Q96EB6, Q2MJK0, Q9UKV8, Q59FM7, Q9NYF8, Q9Y2Y8, Q9NRY4, A0A024RB10, Q99471, H6TXS1, Q5T6Z8, Q5T5X7, C9JRJ5, B4DXI2, P18615, B3KUJ5,…	0.740403	0.892549	0.00211416
GO:0044699	single-organism process	P	12	4610	17	6210	0.705882	0.742351	under	Q16678, Q5JSB5, Q4G148, G3V1D1, Q9BYH2, Q9UDW1, B4DXI2, A0A1B0GVI7, B4DUP5, B4DWS8, B7ZL14, Q05BX6	E9PJ81, H0Y6I0, A0A0K2BMD8, B2RAH5, Q8NE86, B2RAH2, E7EVH9, F5GZI3, B2R983, H3BT57, B2R8W4, H3BST5, B3KXN9, H0Y6I7, B4DEA3, Q8N3U4, B4DMQ7, E7EMW7, B4DN44, Q9H4L5, A0A024R669, Q9H4L4, Q9H4L7, Q9UKU7, Q6IB91, K7EKE8, H0Y6H0, O14561, P52209, B4DVD6, S4R3H4, E9PIX7, H7C5H6, P54868, Q8NDV7, Q8IWJ2, B3KY11, B2RAI2, P19623, P62487, B2R8X4, P42858, A8K6Y1, P61158, Q05BX6, Q9UKV5, P07602, J3KRJ3, Q9UKV8,…	0.741643	0.892549	0.00260304	RefSeqs: Q7RTP6, P19474, A0A0C4DG40, F6SDV2, A0A0C4DG44, B4DXM6, O60344, Q6FG43, Q9HC35, Q9BZS5, Q5H9P4, Q9HBR0, B7ZW30, E5RFK7, B7Z4P1, Q8WUF5, U6FM64, B4DGM3, Q96G03, H7BZ18, A0A087WUN5, A0A024R6E3, Q9HBQ7, Q7L9L4, E9PIF4, B4DGL8, P21796, Q13472, A8K2Q6, Q0VGA5, O75947, Q9Y266, O75940, A0MZ66, Q68E09, Q9BYG3, Q9HAF1, P13073, O00391, Q9BYG5, Q92973, Q68E01, A8K2R3, K7EP07, Q92974, A8K330, B4DII5…
GO:0033554	cellular response to stress	P	2	921	17	6210	0.117647	0.148309	under	Q16678, Q5JSB5	E9PJ81, O00148, Q68E09, Q5JR08, H3BT57, Q68E01, Q53S54, B4DEA3, P60059, B4DGE7, A8K2R3, B3KRB7, F2Z2U4, E7EMW7, B4DL02, A8K4T7, A0A024R669, Q9BQ69, Q92968, Q9H4L7, B4DVD6, S4R3H4, H3BMH3, C8C069, E9PGT3, O60218, P16104, B2R514, Q659C4, O60216, B1APR7, P62487, A0A0C4DFT3, P14174, J3QR41, P67936, Q96EB6, Q9UKV5, A8K2S7, P27694, Q86SY9, B4E0X0, E9PEQ6, H6TXS1, B3KVL0, P63104, P62258, Q8TDB6, Q59EJ8,…	0.741866	0.892549	0.00217155
GO:0009892	negative regulation of metabolic process	P	2	921	17	6210	0.117647	0.148309	under	B4DXI2, A0A1B0GVI7	E9PJ81, F2Z2V0, Q8TDD1, Q9BYG3, F5GZI3, H3BV98, H3BT57, E7ETD6, Q8N3U4, A8K2R3, B3KRB7, E7EMW7, Q9BQ69, A8K4T6, D6RBL4, Q12834, Q5VTR2, S4R3H4, C8C069, Q8NDV7, E9PGT3, B2RAI2, E9PGT1, P51116, P62487, A0A0C4DFT3, Q99598, P14174, Q6NX55, A8K6Y1, J3QR41, Q96EB6, A8K2S7, A8K103, Q9UKV8, Q06124, H6TXS1, Q5T6Z8, C9JRJ5, B4DXI2, P40429, Q6IQ30, A8K2T5, P63104, B4DL06, P62258, P26358, Q59EJ8, A8MW49, C9J…	0.741866	0.892549	0.00217155
GO:0019752	carboxylic acid metabolic process	P	1	475	17	6210	0.0588235	0.0764895	under	Q16678	Q0VGA5, C9JBI3, A8MXV4, Q9H845, B2RBJ8, Q6QNY5, Q5HYD9, O60568, B2R983, B4DJK7, P49137, B4DMQ7, B4DHG3, O75828, B2RCM2, A8K4T6, Q9UKU7, A0A024R301, O14561, O00154, P52209, Q6QN92, P54868, P38117, O60218, P19623, P14174, Q9UI10, F8W031, B3KRC6, Q9Y285, Q6Y1H2, Q96EB6, A8K4W7, Q59FM7, Q9Y2Y8, Q9H7Q4, B2R7W0, Q08426, H0YHN9, H6TXS1, P15104, P16435, P12081, B2R761, P32929, Q86WA8, P40306, P61289, A0A…	0.741939	0.892549	0.00210526
GO:0043436	oxoacid metabolic process	P	1	477	17	6210	0.0588235	0.0768116	under	Q16678	Q0VGA5, C9JBI3, A8MXV4, Q9H845, B2RBJ8, Q6QNY5, Q5HYD9, O60568, B2R983, B4DJK7, P49137, B4DMQ7, B4DHG3, O75828, B2RCM2, A8K4T6, Q9UKU7, A0A024R301, O14561, O00154, P52209, Q6QN92, P54868, P38117, O60218, P19623, P14174, Q9UI10, F8W031, B3KRC6, Q9Y285, Q6Y1H2, Q96EB6, A8K4W7, Q59FM7, Q9Y2Y8, Q9H7Q4, B2R7W0, Q08426, H0YHN9, H6TXS1, P15104, P16435, P12081, B2R761, P32929, Q86WA8, P40306, P61289, A0A…	0.743467	0.892549	0.00209644
GO:0016740	transferase activity	F	2	925	17	6210	0.117647	0.148953	under	Q4G148, Q53EY9	Q59GM9, P51580, Q9BRZ2, Q9NQU5, B2R983, B2R8W4, E7ETD6, Q53S54, B3KRB7, B4DMQ7, A0A140VKC0, F2Z2U4, B3KRB8, E7EMW7, F2Z363, A0A024R669, D6RBL4, Q5VTR2, E9PIX7, Q6QN92, P37268, P54868, B2RCM6, E9PGT3, P19623, Q659C5, Q96IJ6, P62487, Q96EB1, D3DPC4, F8VQX6, J3QR41, Q96EB6, Q9UKV5, B2R758, Q6NUM7, Q9H2G2, A8K103, Q86SY9, A0A024R5X6, Q06124, H6TXS1, B7ZKY2, A0AVT1, B2R761, A8K9A5, P26358, Q8TDB6, Q9C…	0.744196	0.892549	0.00216216
GO:1901575	organic substance catabolic process	P	2	928	17	6210	0.117647	0.149436	under	Q16678, Q53EY9	E9PJ81, A8MXV4, H0YEF3, B2RAH2, H3BT57, A0A087WXM6, B3KXN9, Q53S54, B4DEA3, A0A075B784, A8K2R3, Q9Y3Z3, B4DKM6, E7EMW7, A8K4T6, Q9UKU7, Q12834, O00154, B7Z4N7, Q5VTR2, Q6QN92, P54868, O60218, P38117, P62241, J3QR41, Q9UKV5, Q96EB6, A8K2S7, A8K103, Q9UKV8, B4E0X0, A0AVT1, B2R761, P40429, Q6IQ30, B4DL06, P63104, B2R769, Q59EJ8, Q9C005, Q92947, A8MW49, B2RAK1, P31946, P08708, P26373, Q08ES8, A0A024R…	0.745933	0.893173	0.00215517
GO:0051130	positive regulation of cellular component organization	P	1	483	17	6210	0.0588235	0.0777778	under	Q5JSB5	D6RF48, Q8N108, H0Y6I0, Q5VV41, A5YKK6, Q96HI4, Q68E09, Q5JR08, H3BT57, E7ETD6, Q9UK41, O15511, Q53S54, A0A075B784, P49137, P27348, B4DPW9, H0YN81, A8K2R3, A8K330, P49257, Q12834, Q12955, Q5VTR2, P51116, A0A140TA28, A0A0C4DFT3, P42858, A0A0C4DGV9, P61158, J3QR41, Q9ULX6, Q96EB6, Q9Y281, P27694, A8K103, A8MX75, F5H136, Q9NYF8, A0A024RBR1, B4E0X0, Q12846, Q9BR76, Q5T0N5, H6TXS1, Q9P119, O00291, P61…	0.748	0.894188	0.00207039
GO:0036211	protein modification process	P	3	1354	17	6210	0.176471	0.218035	under	B4DXI2, Q4G148, Q53EY9	E9PJ81, A8K2Q6, Q8NC42, B2RAH5, Q9BRZ2, Q9NQU5, Q68E09, Q9HAF1, Q5JR08, F5GZI3, H3BV98, E7ETD6, H3BT57, Q53S54, H0Y6I7, B4DEA3, Q8N3U4, A0A075B784, B3KRB7, H0YN81, A8K2R3, F2Z2U4, Q92974, E7EMW7, F2Z363, Q9H2H8, B3KRB8, B4DL02, Q9BQ69, A8K556, Q9H4L4, A8K4T6, Q9H4L7, P49257, Q12834, H0Y6H0, O14561, B7Z4N7, Q5VTR2, B4DVD6, E9PGT6, E9PIX7, C8C069, B2RCM6, E9PGT3, O60216, B2R514, B1APR7, Q96EB1, A0A…	0.751067	0.89494	0.00221566
GO:0006464	cellular protein modification process	P	3	1354	17	6210	0.176471	0.218035	under	B4DXI2, Q4G148, Q53EY9	E9PJ81, A8K2Q6, Q8NC42, B2RAH5, Q9BRZ2, Q9NQU5, Q68E09, Q9HAF1, Q5JR08, F5GZI3, H3BV98, E7ETD6, H3BT57, Q53S54, H0Y6I7, B4DEA3, Q8N3U4, A0A075B784, B3KRB7, H0YN81, A8K2R3, F2Z2U4, Q92974, E7EMW7, F2Z363, Q9H2H8, B3KRB8, B4DL02, Q9BQ69, A8K556, Q9H4L4, A8K4T6, Q9H4L7, P49257, Q12834, H0Y6H0, O14561, B7Z4N7, Q5VTR2, B4DVD6, E9PGT6, E9PIX7, C8C069, B2RCM6, E9PGT3, O60216, B2R514, B1APR7, Q96EB1, A0A…	0.751067	0.89494	0.00221566
GO:0010647	positive regulation of cell communication	P	1	492	17	6210	0.0588235	0.0792271	under	Q5JSB5	H0YDD9, F2Z2V0, A0A024R798, Q8N108, Q9NQU5, Q8NE86, B2RAH2, Q96HI4, Q68E09, Q8NB16, B2R7U4, Q5JR08, B2R983, H3BT57, H0YFI1, B4DGE7, P49137, P27348, B3KRB7, P07996, E7EMW7, B4DL02, A8K4T6, Q12955, H3BMH3, C8C069, J3QRU4, P14174, P42858, Q92841, O15405, Q96EB6, Q9H2G2, Q9H5M4, A8K103, Q9NYF8, O95219, Q06124, Q12846, A8KA01, Q99584, B3KUJ5, P40306, P27449, P61289, O14686, P63104, P62258, A0A0A0MSS8,…	0.754657	0.895672	0.00203252
GO:0042981	regulation of apoptotic process	P	1	492	17	6210	0.0588235	0.0792271	under	Q5JSB5	I3L4A2, A8K2Q6, M0QZS0, Q5VV41, Q9NQU5, A0A0C4DFU1, Q96HI4, Q5JR08, B2R7U4, H3BT57, O00273, F8VYH9, P27348, A8K2R3, B3KRB7, B3KM81, B4DMQ7, P07996, Q92974, S4R3H4, C8C069, E9PGT3, C9JFR7, A0A024R0K5, P42858, P14174, B3KUI2, Q6NX55, J3QR41, O15405, Q96EB6, P10809, Q9H2G2, A8K103, Q9NYF8, B4DJN0, E9PEQ6, B4E0X0, Q12846, B2RBL9, H6TXS1, Q9P119, O00291, B3KUJ5, P61289, P63104, B4DL06, P62258, A0A0A0M…	0.754657	0.895672	0.00203252
GO:0048856	anatomical structure development	P	4	1765	17	6210	0.235294	0.284219	under	Q9BYH2, B4DUP5, A0A1B0GVI7, Q16678	Q9Y266, H0Y6I0, B2RAH5, B2RAH2, A0MZ66, F5GZI3, H3BT57, Q9BYG5, H3BST5, H0Y6I7, A8K2R3, Q92974, Q9H4L7, Q92968, Q9Y277, Q12834, Q59EH0, K7EKE8, H0Y6H0, E9PIX7, S4R3H4, C8C069, P54868, H7C5H6, B2RAI2, B2R8X4, P42858, P61158, O15405, Q9Y281, Q96EB6, P10809, P07602, Q9UKV8, Q06124, Q6PJQ8, Q3KRG8, P61160, Q6MZZ4, Q9H0B6, Q9Y295, A8K2T5, Q9Y6A4, F8WFB0, P26358, B4DMU7, O75911, F5H2U8, C9JCN8, Q86SX6,…	0.756471	0.895672	0.00226629
GO:0033043	regulation of organelle organization	P	1	495	17	6210	0.0588235	0.0797101	under	Q5JSB5	I3L4A2, D6RF48, A5YKK6, B2RAH2, Q96HI4, Q68E09, Q5JR08, O60566, H3BT57, Q53S54, O15511, A0A075B784, P27348, B4DPW9, A8K330, Q92974, P49257, Q9Y277, Q12834, Q5T123, A0A140TA28, P42858, A0A0C4DGV9, P61158, J3QR41, Q9Y281, F5H136, B4DLR3, B4DM33, A0A024RBR1, E9PEQ6, Q9NQW6, Q9BR76, Q6PJQ8, Q9P119, H0YEI0, P61160, Q9UJU1, P63104, B4DL06, P62258, Q9UJU6, Q9UHQ9, Q59GN8, Q9UBE0, P31946, P07737, B7Z836,…	0.756839	0.895672	0.0020202
GO:0010033	response to organic substance	P	2	949	17	6210	0.117647	0.152818	under	A0A1B0GVI7, Q16678	E9PJ81, F2Z2V0, M0QZS0, Q9BRZ2, B2RAH2, Q8TDD1, Q5JR08, F5GZI3, H3BV98, H3BT57, E7ETD6, P60059, B3KRB7, Q9Y3Z3, E7EMW7, Q92974, B4DL02, A8K4T6, P54868, C8C069, E9PGT3, O60218, P62487, Q2VIN3, Q6NX55, P10809, Q96EB6, Q9UKV5, A8K2S7, A8K103, Q9UKV8, Q06124, Q12846, A8KAQ3, H6TXS1, B7ZKY2, B3KVL0, P40429, A8K9A5, P27449, B4DL06, P63104, B2R6U9, P26358, Q59EJ8, Q59GN8, P31943, C9JCN8, P31946, A0A024R…	0.757838	0.895672	0.00210748
GO:0023056	positive regulation of signaling	P	1	498	17	6210	0.0588235	0.0801932	under	Q5JSB5	H0YDD9, F2Z2V0, A0A024R798, Q8N108, Q9NQU5, Q8NE86, B2RAH2, Q96HI4, Q68E09, Q8NB16, B2R7U4, Q5JR08, B2R983, H3BT57, H0YFI1, B4DGE7, P49137, P27348, B3KRB7, P07996, E7EMW7, B4DL02, A8K4T6, H3BMH3, C8C069, J3QRU4, P14174, P42858, Q92841, O15405, Q96EB6, Q9H2G2, Q9H5M4, A8K103, Q9NYF8, O95219, Q06124, Q12846, A8KA01, Q99584, B3KUJ5, P40306, P27449, P61289, O14686, P63104, P62258, A0A0A0MSS8, Q9UJU6,…	0.759003	0.895672	0.00200803
GO:0098796	membrane protein complex	C	1	505	17	6210	0.0588235	0.0813205	under	Q9UDW1	E9PJ81, O75947, B3KM89, Q9UEH5, Q8NE86, B2RAH2, B3KUH0, P13073, Q9BVA1, H0YFI1, Q9UK41, O14662, P07996, B4DL02, R4GN43, P28331, P48047, Q9UI09, P08727, B9A067, O14561, Q3SY98, C8C069, J3QRU4, A0A0C4DFT3, P63218, Q8N4V1, O15400, Q9UKV5, P10809, B4DL14, J3KRJ3, A8K103, O95219, B4DN54, A0A024RCT1, Q12846, Q06124, A0A0B4J206, Q3KRG8, B3KVL0, Q9P119, P18859, P27449, B4DL06, P05556, A0A0S2Z523, C9JBL1,…	0.763982	0.896631	0.0019802
GO:0043067	regulation of programmed cell death	P	1	505	17	6210	0.0588235	0.0813205	under	Q5JSB5	I3L4A2, A8K2Q6, M0QZS0, Q5VV41, Q9NQU5, A0A0C4DFU1, Q96HI4, Q5JR08, B2R7U4, H3BT57, F8VYH9, O00273, P27348, A8K2R3, B3KRB7, B3KM81, B4DMQ7, P07996, Q92974, S4R3H4, C8C069, E9PGT3, C9JFR7, A0A024R0K5, P42858, P14174, B3KUI2, Q6NX55, J3QR41, O15405, Q96EB6, P10809, Q9H2G2, A8K103, Q9NYF8, B4DJN0, E9PEQ6, B4E0X0, Q12846, B2RBL9, H6TXS1, Q9P119, O00291, B3KUJ5, P61289, P63104, B4DL06, P62258, A0A0A0M…	0.763982	0.896631	0.0019802
GO:1902580	single-organism cellular localization	P	1	506	17	6210	0.0588235	0.0814815	under	Q5JSB5	O75947, F5H157, H0Y6I0, Q5VV41, Q6QNY0, B2RAH2, Q96HI4, P61020, A0A024RCR6, F5GZI3, H9KV93, A0A087WXM6, H3BST5, Q92973, P61026, P27348, B3KRB7, P59190, E7EMW7, B4DII5, Q92968, Q12955, P48047, A0PJM7, H7C5H6, Q8IWJ2, E9PF10, J3QRU4, A0A0C4DFT3, P42858, P62241, O15400, Q92845, Q96EB6, J3KRJ3, B4DL14, P50395, P25398, O95219, B4DN54, Q12846, A0A087WYR0, Q5T0N5, Q5T6Z8, Q96P70, Q9P119, P18859, B2R761,…	0.764685	0.896631	0.00197628
GO:0009056	catabolic process	P	2	963	17	6210	0.117647	0.155072	under	Q16678, Q53EY9	E9PJ81, A8MXV4, A0A0K2BMD8, H0YEF3, B2RAH2, B2R983, H3BT57, A0A087WXM6, B3KXN9, Q53S54, B4DEA3, A0A075B784, A8K2R3, Q9Y3Z3, B4DKM6, E7EMW7, A8K4T6, Q9UKU7, Q12834, O00154, B7Z4N7, Q5VTR2, Q6QN92, P54868, O60218, P38117, P62241, J3QR41, Q9UKV5, Q96EB6, A8K2S7, A8K103, Q9UKV8, B4E0X0, A0AVT1, B2R761, P40429, Q6IQ30, B4DL06, P63104, B2R769, Q59EJ8, Q9C005, Q92947, A8MW49, B2RAK1, P31946, P08708, P26…	0.765528	0.896631	0.00207684
GO:0044237	cellular metabolic process	P	10	3986	17	6210	0.588235	0.641868	under	Q9UDW1, B4DXI2, K7ER90, B4DUP5, A0A1B0GVI7, Q16678, Q5JSB5, Q4G148, Q96AE4, Q53EY9	E9PJ81, A0A0K2BMD8, B2RAH5, B2RAH2, E7EVH9, F5GZI3, B2R983, H3BT57, B2R8W4, B3KXN9, B4DEA3, H0Y6I7, Q8N3U4, B4DMQ7, E7EMW7, A0A024R669, Q9H4L4, Q9H4L7, A0A024R5U7, Q9UKU7, Q6IB91, O14561, H0Y6H0, P52209, B4DVD6, E9PIX7, S4R3H4, P54868, Q8NDV7, B3KY11, P0CJ79, B2RAI2, P19623, P62487, B2R8X4, D3DPC4, P42858, Q8WXA9, A8K6Y1, Q9UKV5, P07602, B4DMT5, Q9UKV8, B4DMT1, A0A024R5X6, A0A087WZT0, Q5T6Z8, B7Z…	0.765923	0.896631	0.00250878	RefSeqs: Q9HC52, Q6P2P2, F5H227, B2RD27, E7EMI5, Q9UHS8, Q13443, A8K1J3, Q08J23, A0AV47, B4DXL9, Q59G74, A0A0D9SFB3, Q8N0Z8, B5MCK8, Q6P2Q9, Q8WUH2, B7Z532, B5BU16, Q5TEC6, B2RD36, A8MYV4, E9PID8, A0JP11, Q14789, Q7RTP6, P19474, F6SDV2, A0A0C4DG44, O60344, Q9BZS5, Q9HC36, B7ZW30, E5RFK7, B7Z4P1, B4DGM5, Q9P0U0, B4DGM3, Q96G03, H7BZ18, F8WDR2, A0A087WUN5, A0A024R6E3, Q9HBQ7, Q7L9L4, E9PIF4, Q13472…
GO:0044265	cellular macromolecule catabolic process	P	1	517	17	6210	0.0588235	0.0832528	under	Q53EY9	E9PJ81, Q9ULV8, H0YEF3, A5YKK6, A0A0A0MSQ3, O60566, P15374, H3BT57, O00273, A0A087WXM6, Q53S54, Q9UK41, B4DEA3, A0A075B784, Q9UK45, E7EMW7, A8K4T6, Q12834, B7Z4N7, Q5VTR2, Q6P2E9, P62241, J3QR41, Q9UKV5, Q96EB6, A8K103, P25398, Q9UKV8, A0A024R4V8, Q9P0P0, B4E0X0, O95453, B4DUC2, A0A0B4J206, A0AVT1, Q9P119, Q86WA8, P40429, Q6IQ30, P40306, G3XAG7, Q9UJU1, P61289, B4DL06, B7Z9U0, Q59EJ8, Q12972, A0A…	0.772292	0.900574	0.00193424
GO:0048518	positive regulation of biological process	P	5	2191	17	6210	0.294118	0.352818	under	A0A1B0GVI7, Q16678, Q5JSB5, Q96AE4, G3V1D1	A8K2Q6, H0Y6I0, A0A0K2BMD8, B2RAH5, Q8NE86, B2RAH2, A0MZ66, Q68E09, F5GZI3, B2R983, H3BT57, H3BST5, B4DEA3, A8K2R3, K7EP07, Q92974, E7EMW7, B2R506, A8K330, A0A024R669, Q9H4L5, Q9H4L7, Q12834, K7EKE8, H0Y6H0, S4R3H4, E9PIX7, C8C069, F8WB76, B3KY11, P62487, B2R8X4, P42858, Q9H0C8, P61158, P49006, O15400, O15405, A8K321, Q96EB6, P10809, Q9Y281, P27694, Q9UKV8, B4DMT1, A0A024R5X6, A0A024RBR1, E9PEQ6,…	0.772876	0.900574	0.00228206
GO:0002682	regulation of immune system process	P	1	518	17	6210	0.0588235	0.0834138	under	A0A1B0GVI7	O14672, Q9NQU5, Q562L9, Q5JR08, B2R7U4, H3BRR0, H3BV98, H3BT57, F8VYH9, O15511, B4DEA3, P49137, H0YN81, B3KRB7, B3KM81, P07996, Q9Y3Z3, P27487, A8K4T7, B4DL02, A8K4T6, Q92968, K7EKE8, Q9Y399, Q5JVZ8, B4DVD6, S4R3H4, Q8NC33, A0A024R0K5, J3QLI9, P51116, J3QRU4, B2R8X4, P14174, P61158, O15400, O15405, P10809, Q96EB6, A8K103, Q9BRX8, O95219, Q12846, Q06124, B2RBL9, Q3KRG8, P61160, K7ES89, P40306, Q9U…	0.772972	0.900574	0.0019305
GO:0005794	Golgi apparatus	C	1	525	17	6210	0.0588235	0.0845411	under	Q4G148	F5H157, O14672, H0Y6I0, Q9NRW7, Q96HI4, B4DYI0, Q5JR08, H3BRR0, O00391, H0YFI1, O14662, P61026, A8K690, P08842, P59190, F2Z2U4, P49257, O14681, Q12955, Q9NRX6, Q8NDV7, Q8IWJ2, B2RAI2, J3QRU4, A0A0C4DFT3, P42858, Q8N4V1, B2R758, D6RF69, Q9H5M4, A8K103, Q8NEW0, B4DJN0, A0A024RCT1, Q96NT0, C9JG41, A8KAQ3, A8KA01, Q5T0N5, Q5T6Z8, Q9P119, O00291, P18858, A0A024RDV5, B4DIK4, F8WFB0, Q9C005, Q9C004, Q4G…	0.777679	0.902534	0.00190476
GO:0044700	single organism signaling	P	4	1813	17	6210	0.235294	0.291948	under	A0A1B0GVI7, Q5JSB5, B4DWS8, Q05BX6	B2RAH5, Q8NE86, B2RAH2, A0MZ66, Q68E09, Q9HAF1, F5GZI3, B2R983, H3BT57, Q9BYG5, H3BST5, B4DEA3, A8K2R3, Q92974, E7EMW7, B4DN44, Q59EH0, K7EKE8, Q8NDV7, C8C069, F8WB76, H7C5H6, P62487, P42858, P61158, O15405, Q05BX6, Q96EB6, Q9UKV5, P10809, P27694, Q9UKV8, A0A024R5X6, E9PEQ6, Q06124, Q12846, B7ZKY2, Q3KRG8, P61160, Q99584, P26358, Q59EJ8, B2RAK1, F5H2U8, C9JCN8, A0A024R201, A0A024R684, Q13707, F8W…	0.777706	0.902534	0.00220629
GO:0005773	vacuole	C	1	526	17	6210	0.0588235	0.0847021	under	Q05BX6	A0A024R798, F5H157, Q9NRW7, B2RAH2, P61020, B3KUH0, Q5JR08, Q9HBH5, Q6PJ25, H0YFI1, Q9UK41, O14662, P61026, Q53SV2, B4DGE7, P08842, P59190, K7EP07, P27487, Q8NEX1, J3QRU4, P42858, Q8N4V1, O15400, Q8N697, Q05BX6, A6NHL2, P10809, P07602, A8K103, Q12965, O95219, Q8NEW0, B4DJN0, B4DTA9, A0A024RBR1, A0A024RB10, C9JG41, Q12846, A8KAQ3, Q5T6Z8, Q9Y2Z0, O60784, P27449, Q9UJU1, B2RAK1, Q9NQX4, Q9BXB4, Q6L…	0.778344	0.902534	0.00190114
GO:0005515	protein binding	F	12	4690	17	6210	0.705882	0.755233	under	Q9BYH2, B4DXI2, K7ER90, A0A1B0GVI7, B4DUP5, Q5JSB5, Q96AE4, B7ZL14, G3V1D1, Q05BX6, M0R2S3, Q53EY9	E9PJ81, H0Y6I0, B2RAH7, A0A0K2BMD8, B2RAH5, Q8NE86, S4R3I2, Q6YHU6, B2RAH2, F5GZI3, B2R983, H3BT57, H3BST5, B4DEA3, H0Y6I7, Q8N3U4, B4DMQ7, O14545, E7EMW7, A0A024R669, Q9H4L5, B4DN44, Q9H4L4, Q9H4L7, Q6IB91, K7EKE8, H0Y6H0, B4DVD6, S4R3H4, E9PIX7, H7C5H6, Q8NDV7, Q8IWJ2, B3KY11, B2RAI2, P19623, Q96IJ6, B2R8X4, P42858, Q8WXA9, A8K6Y1, P61158, Q05BX6, Q9UKV5, B4DMT5, P07602, Q9NXD3, J3KRJ3, Q9UKV8,…	0.781366	0.904609	0.00255864	RefSeqs: B4DGM5, Q8WUF5, Q9P0U0, B4DGM3, Q96G03, F8WDR2, A0A024R6E3, Q9HBQ7, Q7L9L4, B2RD51, Q6ZQN2, Q9UHV9, B4DGL8, P21796, Q13472, A8K2Q6, Q9Y266, O75940, A0MZ66, Q9BYG3, Q68E09, Q9HAF1, P13073, Q9BYG5, Q92973, Q68E01, A8K2R3, K7EP07, B2R506, Q92974, B4DII5, A8K330, Q9BQ69, Q92968, O75934, Q12834, Q9Y277, Q59EH0, C8C069, F8WB76, A0A024R1M8, E9PF10, P16104, B2R514, Q96EB1, Q99598, Q9H0C8, P49006…
GO:0031967	organelle envelope	C	1	537	17	6210	0.0588235	0.0864734	under	Q9UDW1	O75947, A0A024R3R5, Q9H845, P67809, Q9UEH5, Q8IXM3, Q8NE86, B3KUH0, P13073, H3BT57, F8VYH9, H3BST5, Q9BVA1, Q92973, P60059, Q96DA6, Q75MM6, Q53T76, Q9H4L5, O95202, R4GN43, A0A024R301, P28331, Q9Y277, P48047, Q9NQ50, Q9NRX2, Q9UI09, B9A067, O14561, Q3SY98, E9PGT3, C9JFR7, E9PF10, H0YNX7, B3KM95, Q96EB6, Q6NUM7, J3KRJ3, B4DL14, B4DN54, Q6NUM9, P18859, O60783, A8K9A5, K7EKI4, Q6FHK1, P54886, Q9BQ48,…	0.785534	0.905965	0.0018622
GO:0031975	envelope	C	1	541	17	6210	0.0588235	0.0871176	under	Q9UDW1	O75947, A0A024R3R5, Q9H845, P67809, Q9UEH5, Q8IXM3, Q8NE86, B3KUH0, P13073, H3BT57, F8VYH9, H3BST5, Q9BVA1, Q92973, P60059, Q96DA6, Q75MM6, Q53T76, Q9H4L5, O95202, R4GN43, A0A024R301, P28331, Q9Y277, P48047, Q9NQ50, Q9NRX2, Q9UI09, B9A067, O14561, Q3SY98, E9PGT3, C9JFR7, E9PF10, H0YNX7, B3KM95, Q96EB6, Q6NUM7, J3KRJ3, B4DL14, B4DN54, Q6NUM9, P18859, O60783, A8K9A5, K7EKI4, Q6FHK1, P54886, Q9BQ48,…	0.788094	0.905965	0.00184843
GO:0023052	signaling	P	4	1839	17	6210	0.235294	0.296135	under	A0A1B0GVI7, Q5JSB5, B4DWS8, Q05BX6	B2RAH5, Q8NE86, B2RAH2, A0MZ66, Q68E09, Q9HAF1, F5GZI3, B2R983, H3BT57, Q9BYG5, H3BST5, B4DEA3, A8K2R3, Q92974, E7EMW7, B4DN44, Q12834, Q59EH0, K7EKE8, Q8NDV7, C8C069, F8WB76, H7C5H6, P62487, P42858, P61158, O15405, Q05BX6, Q96EB6, Q9UKV5, P10809, P27694, Q9UKV8, A0A024R5X6, E9PEQ6, Q06124, Q12846, B7ZKY2, Q3KRG8, P61160, Q99584, P26358, Q59EJ8, B2RAK1, F5H2U8, C9JCN8, A0A024R201, A0A024R684, Q13…	0.788669	0.905965	0.0021751
GO:0044425	membrane part	C	3	1435	17	6210	0.176471	0.231079	under	Q9BYH2, Q9UDW1, Q16678	E9PJ81, O75947, A0A024R3R5, F5H157, Q9UEH5, Q8NE86, B2RAH2, Q5JR08, F5GZI3, P13073, O00391, H3BST5, Q0JRZ9, P60059, B3KRB7, B2R6S9, Q92974, P27487, B4DL02, A8K556, Q92968, P49257, P28331, Q9Y277, P08727, K7EKE8, B9A067, Q59EH0, O14561, F8WB76, P37268, C8C069, Q9NR77, H7C5H6, A0A024R1M8, Q8NC33, A0A0C4DFT3, B3KRC6, O15400, P67936, Q6Y1H2, Q9UKV5, P10809, Q6NUM7, P07602, B4DL14, J3KRJ3, A8K103, B4D…	0.789217	0.905965	0.00209059
GO:0006928	movement of cell or subcellular component	P	1	543	17	6210	0.0588235	0.0874396	under	Q9BYH2	O14672, Q5VV41, P52799, Q6QNY0, B2RAH2, A0MZ66, Q562L9, Q5JR08, B2R7U4, A0A0A0MTS5, H9KV93, Q9BYG5, Q9BVA1, H3BST5, O15511, Q53S54, P61026, B4DPW9, P07996, B4DL02, P27487, Q92968, Q12955, P08727, A0PJM7, Q5T123, Q5JVZ8, Q5VTR2, Q96PY5, C8C069, A0A024R0K5, Q5T0Q6, B2R8X4, P14174, P42858, P61158, Q92845, P67936, Q9UKV5, Q8N335, Q9H2G2, A8K103, A0A024R4V8, Q12965, Q13813, Q06124, Q9NQW6, Q12846, B2R…	0.789363	0.905965	0.00184162
GO:0031090	organelle membrane	C	2	1010	17	6210	0.117647	0.162641	under	Q9UDW1, Q4G148	O75947, A0A024R3R5, F5H157, Q9UEH5, Q8NE86, Q5JR08, Q53RT9, P13073, O00391, H3BT57, H3BST5, B4DGE7, Q9H4L5, P27487, Q92968, P49257, P28331, Q9Y277, B9A067, O14561, Q9NR77, E9PGT3, P42858, O15400, Q8N697, Q96EB6, B2R758, Q6NUM7, P07602, B4DL14, J3KRJ3, A8K103, B4DTA9, B4DN54, A0A024RBR1, Q6NUM9, B7ZKY2, P27449, A8K9A5, P63104, B4DIK4, P62258, K7EKI4, P54886, Q9BQ48, O75911, B2RAK1, P31946, P31947,…	0.789942	0.905965	0.0019802
GO:0007154	cell communication	P	4	1848	17	6210	0.235294	0.297585	under	A0A1B0GVI7, Q5JSB5, B4DWS8, Q05BX6	B2RAH5, Q8NE86, B2RAH2, A0MZ66, Q68E09, Q9HAF1, F5GZI3, B2R983, H3BT57, Q9BYG5, H3BST5, B4DEA3, A8K2R3, Q92974, E7EMW7, B4DN44, Q12834, Q59EH0, K7EKE8, Q8NDV7, C8C069, F8WB76, H7C5H6, P62487, P42858, P61158, O15405, Q05BX6, Q96EB6, Q9UKV5, P10809, P27694, Q9UKV8, A0A024R5X6, E9PEQ6, Q06124, Q12846, B7ZKY2, Q3KRG8, P61160, Q99584, P26358, Q59EJ8, B2RAK1, F5H2U8, C9JCN8, A0A024R201, A0A024R684, Q13…	0.792376	0.907339	0.0021645
GO:0043412	macromolecule modification	P	3	1447	17	6210	0.176471	0.233011	under	B4DXI2, Q4G148, Q53EY9	E9PJ81, A8K2Q6, Q8NC42, B2RAH5, Q9BRZ2, Q9NQU5, Q68E09, Q9HAF1, Q5JR08, F5GZI3, H3BV98, E7ETD6, H3BT57, Q53S54, B3KRB2, H0Y6I7, B4DEA3, Q8N3U4, A0A075B784, B3KRB7, H0YN81, A8K2R3, F2Z2U4, Q92974, E7EMW7, F2Z363, Q9H2H8, B3KRB8, B4DL02, Q9BQ69, A8K556, Q9H4L4, A8K4T6, D6RBL4, Q9H4L7, P49257, Q12834, H0Y6H0, O14561, B7Z4N7, Q5VTR2, B4DVD6, E9PGT6, E9PIX7, C8C069, B2RCM6, E9PGT3, O60216, B2R514, B1A…	0.794483	0.90761	0.00207326
GO:0044429	mitochondrial part	C	1	554	17	6210	0.0588235	0.089211	under	Q9UDW1	O75947, Q9H845, Q9UEH5, Q8IXM3, Q8NE86, P13073, H3BST5, B3KM81, Q96DA6, Q53T76, R4GN43, O95202, Q9UKU7, P28331, A0A024R301, Q9Y277, P48047, Q6IB91, Q9UI09, Q9NQ50, Q9NRX2, B9A067, O14561, Q3SY98, P54868, Q6QN92, C9JFR7, P38117, O60218, F8W031, B3KM95, P10809, Q6NUM7, B4DL14, J3KRJ3, A8K4W7, B4DN54, Q9H7Q4, B2R7W0, H0YHN9, O95571, P18859, O60783, A8K9A5, K7EKI4, Q9Y2Z4, Q6FHK1, P54886, Q8N4T8, Q9B…	0.796216	0.90761	0.00180505
GO:0031325	positive regulation of cellular metabolic process	P	2	1023	17	6210	0.117647	0.164734	under	A0A1B0GVI7, Q5JSB5	B2RAH5, Q9NQU5, B2RAH2, O00148, Q68E09, Q5JR08, H3BT57, E7ETD6, H0YN81, A8K2R3, B3KRB7, Q92974, B2R506, B4DL02, A0A024R669, A8K4T6, Q9H4L7, Q12834, Q5VTR2, E9PIX7, C8C069, E9PGT3, P51116, B1APR7, P62487, B2R8X4, P14174, Q2VIN3, O15405, J3QR41, Q96EB6, P10809, Q9H2G2, A8K103, Q9UKV8, F5H136, A0A024R5X6, H6TXS1, B4DXI2, H0YJ25, Q6MZZ4, B4DL06, P63104, B2R6U9, P26358, F8WFB0, Q59EJ8, Q59GN8, F5H2U8,…	0.796323	0.90761	0.00195503
GO:0071704	organic substance metabolic process	P	10	4065	17	6210	0.588235	0.654589	under	Q9UDW1, B4DXI2, K7ER90, B4DUP5, A0A1B0GVI7, Q16678, Q5JSB5, Q4G148, Q96AE4, Q53EY9	E9PJ81, B2RAH7, B2RAH5, B2RAH2, E7EVH9, F5GZI3, B2R983, H3BT57, B2R8W4, B3KXN9, B4DEA3, H0Y6I7, Q8N3U4, B4DMQ7, E7EMW7, A0A024R669, Q9H4L4, Q9H4L7, A0A024R5U7, Q9UKU7, Q6IB91, O14561, H0Y6H0, P52209, B4DVD6, E9PIX7, S4R3H4, P54868, Q8NDV7, B3KY11, P0CJ79, B2RAI2, P19623, P62487, B2R8X4, P42858, Q8WXA9, A8K6Y1, Q9UKV5, P07602, B4DMT5, Q9UKV8, B4DMT1, A0A024R5X6, A0A087WZT0, Q5T6Z8, B7ZKY2, B4DVE4,…	0.799261	0.909547	0.00246002	RefSeqs: E7EMI5, Q13443, A8K1J3, Q08J23, A0AV47, A0A120HF56, B4DXL9, Q59G74, A0A0D9SFB3, Q8N0Z8, B5MCK8, Q6P2Q9, Q8WUH2, B7Z532, B5BU16, Q5TEC6, A8MYV4, E9PID8, A0JP11, Q14789, Q7RTP6, P19474, F6SDV2, A0A0C4DG44, O60344, Q6FG43, Q9BZS5, Q9HC36, B7ZW30, E5RFK7, B7Z4P1, B4DGM5, Q9P0U0, B4DGM3, Q96G03, H7BZ18, F8WDR2, A0A087WUN5, Q9HBQ7, A0A024R6E3, Q7L9L4, E9PIF4, Q13472, A8K2Q6, Q0VGA5, O75947, O7…
GO:0043226	organelle	C	14	5353	17	6210	0.823529	0.861997	under	Q16678, Q5JSB5, Q4G148, A0A0J9YX89, G3V1D1, Q9UDW1, Q9BYH2, B4DXI2, K7ER90, A0A1B0GVI7, B4DUP5, Q96AE4, B7ZL14, Q05BX6	E9PJ81, H0Y6I0, A0A0K2BMD8, B2RAH5, Q8NE86, B2RAH2, E7EVH9, F5GZI3, B2R983, H3BT57, B2R8W4, H3BST5, B4DEA3, H0Y6I7, Q8N3U4, B4DMQ7, E7EMW7, B4DN44, Q9H4L5, A0A024R669, Q9H4L4, Q9H4L7, A0A024R5U7, Q9UKU7, Q6IB91, K7EKE8, H0Y6H0, O14561, P52209, B4DVD6, E9PIX7, S4R3H4, P54868, Q8NDV7, H7C5H6, Q8IWJ2, B2RAI2, B3KY11, Q96IJ6, P62487, D3DPC4, B2R8X4, P42858, Q8WXA9, A8K6Y1, P61158, Q05BX6, Q9UKV5, P07…	0.800991	0.910105	0.00261536	RefSeqs: E9PID8, Q14789, A0JP11, Q7RTP6, P19474, A0A0C4DG40, F6SDV2, A0A0C4DG44, O60344, Q6FG43, Q9HC35, Q9BZS5, Q5H9P4, E5RFK7, B7Z4P1, B4DGM5, Q8WUF5, Q9P0U0, U6FM64, B4DGM3, Q7RU05, Q96G03, H7BZ18, F8WDR2, A0A087WUN5, Q9HBQ7, A0A024R6E3, Q7L9L4, B2RD51, Q6ZQN2, E9PIF4, Q9UHV9, B4DGL8, P21796, Q13472, A8K2Q6, O75947, Q0VGA5, Q9Y266, O75940, A0MZ66, Q9BYG3, Q68E09, Q9HAF1, P13073, O00391, Q9BYG5…
GO:0044707	single-multicellular organism process	P	4	1875	17	6210	0.235294	0.301932	under	Q9BYH2, B4DUP5, A0A1B0GVI7, Q16678	Q9Y266, H0Y6I0, B2RAH5, B2RAH2, A0MZ66, F5GZI3, B2R983, H3BT57, Q9BYG5, H3BST5, H0Y6I7, A8K2R3, Q92974, Q9H4L7, Q92968, Q12834, Q59EH0, H0Y6H0, E9PIX7, S4R3H4, C8C069, F8WB76, P54868, H7C5H6, B2RAI2, P62487, B2R8X4, P42858, P61158, O15405, Q96EB6, P10809, Q9Y281, P07602, A0A024R5X6, Q06124, A0AVT1, B7ZKY2, Q3KRG8, P61160, Q99584, Q6MZZ4, Q9H0B6, Q9Y295, A8K2T5, Q9Y6A4, F8WFB0, P26358, Q59EJ8, B4D…	0.803227	0.911234	0.00213333
GO:0010941	regulation of cell death	P	1	568	17	6210	0.0588235	0.0914654	under	Q5JSB5	I3L4A2, A8K2Q6, M0QZS0, A0A0K2BMD8, Q5VV41, Q9NQU5, A0A0C4DFU1, Q96HI4, Q5JR08, B2R7U4, H3BT57, F8VYH9, O00273, P27348, A8K2R3, B3KRB7, B3KM81, B4DMQ7, P07996, Q92974, S4R3H4, C8C069, E9PGT3, C9JFR7, A0A024R0K5, P42858, P14174, B3KUI2, Q6NX55, J3QR41, O15405, Q96EB6, P10809, Q9H2G2, A8K103, Q9NYF8, B4DJN0, A0A024RB10, E9PEQ6, B4E0X0, Q12846, B2RBL9, H6TXS1, P16435, Q9P119, O00291, B3KUJ5, P61289,…	0.804635	0.911267	0.00176056
GO:0044767	single-organism developmental process	P	4	1882	17	6210	0.235294	0.30306	under	Q9BYH2, B4DUP5, A0A1B0GVI7, Q16678	Q9Y266, H0Y6I0, B2RAH5, B2RAH2, A0MZ66, F5GZI3, H3BT57, Q9BYG5, H3BST5, H0Y6I7, A8K2R3, K7EP07, Q92974, Q9H4L7, Q92968, Q9Y277, Q12834, Q59EH0, K7EKE8, H0Y6H0, E9PIX7, S4R3H4, C8C069, P54868, H7C5H6, B2RAI2, P62487, B2R8X4, P42858, P61158, O15405, Q96EB6, Q9Y281, P10809, P07602, Q9UKV8, Q06124, Q6PJQ8, Q3KRG8, P61160, Q6MZZ4, Q9H0B6, Q9Y295, A8K2T5, Q9Y6A4, F8WFB0, P26358, B4DMU7, O75911, F5H2U8,…	0.805974	0.911267	0.0021254
GO:0044093	positive regulation of molecular function	P	1	572	17	6210	0.0588235	0.0921095	under	G3V1D1	B2RAH5, Q5VV41, Q9NQU5, B2RAH2, Q68E09, O60566, Q5JR08, Q8NB16, B2R983, Q9ULW0, P49137, A8K2R3, B3KRB7, P27348, B3KM81, P07996, B2R506, Q92974, B4DL02, A8K4T6, Q12834, Q12955, Q59EH0, Q5T123, Q9NRX5, C8C069, C9JFR7, J3QS66, P42858, J3QR41, P10809, Q9UKV5, Q96EB6, A8K3S0, Q9H2G2, Q9UK58, A8K103, F5H136, Q13813, B4DJN0, A0A024RAP0, Q12846, P16435, O00291, Q9Y2Z0, P40306, P61289, B4DL06, P63104, Q9U…	0.80698	0.911267	0.00174825
GO:0044459	plasma membrane part	C	1	580	17	6210	0.0588235	0.0933977	under	Q9BYH2	H0YDD9, F5H157, O14672, P52799, B2RAH2, Q5JR08, F5GZI3, Q9BVA1, P61026, B4DPW9, B3KRB7, P59190, B3KM81, P07996, Q92974, P27487, B4DL02, A8K556, Q12955, P08727, K7EKE8, C8C069, F8WB76, A0A024R0K5, J3QRU4, A0A0C4DFT3, P63218, F8W031, O15400, P67936, A8K103, Q12965, O95219, B4DJN0, A0A024RCT1, Q06124, Q12846, Q9BR76, A0A0U1RQR3, B7ZKY2, Q3KRG8, Q9P119, B3KVL0, K7ES89, Q9UJU1, B4DL06, P05556, O75911,…	0.81159	0.915065	0.00172414
GO:0006508	proteolysis	P	1	584	17	6210	0.0588235	0.0940419	under	Q53EY9	E9PJ81, Q9ULV8, F2Z2V0, O14672, B2RAH7, A0A0A0MSQ3, H7C2A6, O60566, P15374, H3BT57, Q53S54, Q9UK41, B4DEA3, A0A075B784, P27348, B3KM81, F2Z2U4, P07996, E7EMW7, P27487, A8K4T6, Q9H4L4, Q12834, B7Z4N7, Q5VTR2, E9PGT6, E9PGT3, C9JFR7, B2R514, Q6ZWP8, Q2VIN3, J3QR41, P10809, Q9UKV5, Q96EB6, B4DMT5, Q12962, A8K103, A0A024R4V8, B4DJN0, Q9P0P0, B4DUC2, Q5T6Z8, A0A0B4J206, A0AVT1, Q9P119, O00291, B3KUJ5,…	0.813856	0.916072	0.00171233
GO:0005783	endoplasmic reticulum	C	1	586	17	6210	0.0588235	0.0943639	under	Q16678	E9PJ81, A8K2Q6, D6RF48, A0A024R3R5, B4DUA6, B3KM89, O14672, B7Z4M5, O00264, Q5VV42, Q9NRW5, O60568, A7BI36, B2R7U4, Q5JR08, Q9HBH5, Q6PJ25, B2R8W4, P60059, O14662, P61026, P08842, B2R6S9, P59190, B4DHG3, P07996, Q9H4L5, Q92604, P49257, J3KSI4, O14681, Q12955, Q9NRX5, P37268, E7EM50, A0A0C4DFT3, P42858, F8W150, P30519, Q8N4V1, B3KRC6, Q9H1E5, Q92845, Q6Y1H2, Q9UKV5, Q6NUM7, A8K2S7, B4DJN0, J3KNB5,…	0.814979	0.916072	0.00170648
GO:0006139	nucleobase-containing compound metabolic process	P	5	2307	17	6210	0.294118	0.371498	under	Q9UDW1, B4DXI2, A0A1B0GVI7, Q5JSB5, Q96AE4	A8K2Q6, Q0VGA5, O75947, O75940, B2RAH5, B2RAH2, Q9BYG3, Q68E09, E7EVH9, P13073, H3BT57, Q68E01, B4DEA3, Q8N3U4, A8K2R3, B4DMQ7, Q92974, E7EMW7, B2R506, B4DII5, A8K330, A0A024R669, Q9BQ69, Q9H4L4, A0A024R5U7, Q9H4L7, D6RBL4, O75934, O14561, H0Y6H0, P52209, B4DVD6, S4R3H4, C8C069, B3KY11, P0CJ79, B2RAI2, P16104, B2R514, P62487, Q96EB1, B2R8X4, Q8WXA9, A8K6Y1, Q9Y285, A0A0A8K8C0, O15405, Q96EB6, P10…	0.817969	0.918027	0.00216732
[truncated: 80 more rows]
